# Supplementary material for: Genomic analysis of the causative agents of coccidiosis in domestic chickens
Source: HighWire-hosted journal article supplement (doi:10.1101/gr.168955.113), 2014-07-11
Supplement: Dataset_S1.xlsx [file Dataset_S1.xlsx]

## Sheet: Novel families
Family	Species	# members	Members
esf1	E. tenella	42	ETH_00031345	ETH_00018310	ETH_00016145	ETH_00021070	ETH_00012200	ETH_00031525	ETH_00025955	ETH_00025960	ETH_00004515	ETH_00016715	ETH_00031360	ETH_00016135	ETH_00016150	ETH_00025895	ETH_00018305	ETH_00016710	ETH_00025900	ETH_00014770	ETH_00031500	ETH_00031495	ETH_00031490	ETH_00031470	ETH_00001090	ETH_00001085	ETH_00016120	ETH_00004525	ETH_00025600	ETH_00003965	ETH_00013470	ETH_00013475	ETH_00004520	ETH_00007960	ETH_00025965	ETH_00016130	ETH_00016140	ETH_00018300	ETH_00018315	ETH_00017310	ETH_00030550	ETH_00014825
	E. necatrix	40	ENH_00030160	ENH_00052180	ENH_00051350	ENH_00082400	ENH_00003100	ENH_00029170	ENH_00039800	ENH_00056810	ENH_00030130	ENH_00019600	ENH_00051330	ENH_00035010	ENH_00052170	ENH_00056820	ENH_00035020	ENH_00000790	ENH_00003150	ENH_00003160	ENH_00003170	ENH_00003210	ENH_00007370	ENH_00007380	ENH_00009840	ENH_00015210	ENH_00022400	ENH_00023000	ENH_00023340	ENH_00023350	ENH_00032380	ENH_00038940	ENH_00042730	ENH_00051320	ENH_00051340	ENH_00052160	ENH_00052190	ENH_00060140	ENH_00072360	ENH_00085780	ENH_00000770	ENH_00035120
	E. acervulina	18	EAH_00052470	EAH_00064650	EAH_00001560	EAH_00045350	EAH_00062480	EAH_00065230	EAH_00015780	EAH_00034030	EAH_00048800	EAH_00048810	EAH_00034050	EAH_00041800	EAH_00066740	EAH_00067560	EAH_00068270	EAH_00022630	EAH_00041910	EAH_00034040
	E. maxima	20	EMW_00015380	EMW_00022200	EMW_00022210	EMW_00022220	EMW_00022230	EMW_00058350	EMW_00059050	EMW_00028910	EMW_00057600	EMW_00058870	EMW_00008220	EMW_00022180	EMW_00014990	EMW_00015000	EMW_00036920	EMW_00000370	EMW_00002940	EMW_00046660	EMW_00058830	EMW_00022190
	E. mitis	30	EMH_0019470	EMH_0043060	EMH_0074310	EMH_0093290	EMH_0002220	EMH_0002230	EMH_0016430	EMH_0044680	EMH_0035230	EMH_0072370	EMH_0049680	EMH_0044530	EMH_0053200	EMH_0085090	EMH_0087550	EMH_0014950	EMH_0039670	EMH_0071700	EMH_0044570	EMH_0022170	EMH_0022180	EMH_0022190	EMH_0038110	EMH_0061280	EMH_0066820	EMH_0046740	EMH_0069860	EMH_0014940	EMH_0085710	EMH_0091080
	E. brunetti	50	EBH_0035680	EBH_0035700	EBH_0040830	EBH_0049760	EBH_0049770	EBH_0049780	EBH_0049800	EBH_0049810	EBH_0066070	EBH_0066090	EBH_0081100	EBH_0083770	EBH_0084830	EBH_0085270	EBH_0085540	EBH_0072000	EBH_0075890	EBH_0075910	EBH_0014880	EBH_0021930	EBH_0056410	EBH_0056420	EBH_0006620	EBH_0040420	EBH_0010590	EBH_0010600	EBH_0039720	EBH_0047820	EBH_0047830	EBH_0040430	EBH_0002980	EBH_0029240	EBH_0084170	EBH_0001490	EBH_0013790	EBH_0013810	EBH_0000750	EBH_0000760	EBH_0000770	EBH_0000780	EBH_0000790	EBH_0000810	EBH_0000820	EBH_0023370	EBH_0030900	EBH_0007990	EBH_0020700
	E. praecox	25	EPH_0010570	EPH_0021210	EPH_0055020	EPH_0059140	EPH_0065150	EPH_0066320	EPH_0067720	EPH_0050610	EPH_0002020	EPH_0004180	EPH_0004190	EPH_0025380	EPH_0004600	EPH_0010470	EPH_0004930	EPH_0014550	EPH_0017450	EPH_0017470	EPH_0010440	EPH_0074430	EPH_0074880	EPH_0058240	EPH_0035170	EPH_0050820	EPH_0010450
esf2	E. tenella	23	ETH_00018550	ETH_00018555	ETH_00018560	ETH_00018565	ETH_00018570	ETH_00022415	ETH_00008110	ETH_00018600	ETH_00018605	ETH_00018610	ETH_00018615	ETH_00018580	ETH_00018585	ETH_00018590	ETH_00018595	ETH_00018540	ETH_00018535	ETH_00018530	ETH_00018525	ETH_00018520	ETH_00022330	ETH_00022350	ETH_00018575
	E. necatrix	22	ENH_00012300	ENH_00012310	ENH_00023750	ENH_00023760	ENH_00072020	ENH_00025800	ENH_00034770	ENH_00022370	ENH_00026920	ENH_00053640	ENH_00053650	ENH_00053660	ENH_00071990	ENH_00072000	ENH_00023770	ENH_00023780	ENH_00023790	ENH_00023800	ENH_00023810	ENH_00071280	ENH_00071320	ENH_00072010
	E. acervulina	2	EAH_00063390	EAH_00009940
	E. maxima	4	EMW_00029990	EMW_00049330	EMW_00030020	EMW_00058450
	E. mitis	2	EMH_0030130	EMH_0039240
	E. brunetti	10	EBH_0030310	EBH_0030300	EBH_0069200	EBH_0011200	EBH_0030330	EBH_0030340	EBH_0030370	EBH_0084290	EBH_0084350	EBH_0011220
	E. praecox	4	EPH_0073980	EPH_0036370	EPH_0018650	EPH_0057050
esf3	E. tenella	17	ETH_00011380.1	ETH_00011385.1	ETH_00011390.1	ETH_00011395.1	ETH_00011400.1	ETH_00020170.1	ETH_00020175.1	ETH_00020180.1	ETH_00020185.1	ETH_00020190.1	ETH_00020195.1	ETH_00030115.1	ETH_00030120.1	ETH_00030125.1	ETH_00030130.1	ETH_00030135.1	ETH_00030140.1
	E. necatrix		-
	E. acervulina		-
	E. maxima		-
	E. mitis		-
	E. brunetti		-
	E. praecox		-
esf4	E. tenella	9	ETH_00000535.1	ETH_00000540.1	ETH_00000545.1	ETH_00002320.1	ETH_00010320.1	ETH_00010325.1	ETH_00026055.1	ETH_00034275.1	ETH_00034350.1
	E. necatrix		-
	E. acervulina		-
	E. maxima		-
	E. mitis		-
	E. brunetti		-
	E. praecox		-
esf5	E. tenella	9	ETH_00003085.1	ETH_00011220.1	ETH_00029610.1	ETH_00029615.1	ETH_00029620.1	ETH_00029625.1	ETH_00029820.1	ETH_00032700.1	ETH_00032705.1
	E. necatrix	2	ENH_00014800	ENH_00014810
	E. acervulina	1	EAH_00042690
	E. maxima	1	EMW_00055200
	E. mitis	1	EMH_0069700
	E. brunetti	1	EBH_0056180
	E. praecox	1	EPH_0026480
esf6	E. tenella	10	ETH_00018795	ETH_00021165	ETH_00013515	ETH_00013485	ETH_00013490	ETH_00013500	ETH_00013505	ETH_00013510	ETH_00021170	ETH_00021175
	E. necatrix	7	ENH_00049900	ENH_00024090	ENH_00033110	ENH_00011290	ENH_00021260	ENH_00032520	ENH_00032530
	E. acervulina	2	EAH_00001770	EAH_00067270
	E. maxima	6	EMW_00008090	EMW_00059320	EMW_00060200	EMW_00037730	EMW_00048910	EMW_00048890
	E. mitis	3	EMH_0051810	EMH_0088400	EMH_0056280
	E. brunetti	3	EBH_0014730	EBH_0042860	EBH_0042850
	E. praecox	5	EPH_0044090	EPH_0055640	EPH_0064760	EPH_0065740	EPH_0012160
[truncated: 3 more columns]

## Sheet: ropk families
Family	Ids
Eten1	EAH_00025320	EAH_00025330	EAH_00061960	EBH_0043140	EBH_0043150	EMH_0008940	EMH_0078390	ENH_00065170	ENH_00065180	ENH_00065190
Eten2a	EBH_0028350	EMH_0007270	ENH_00026360
Eten2b	EAH_00024380	ENH_00026550
Eten3	EAH_00001780	EAH_00035630	EAH_00035640	EAH_00066590	EBH_0014740	EBH_0034050	EBH_0034060	EBH_0034070	EBH_0072720	EBH_0083470	EBH_0083490	EMH_0008950	EMH_0021070	EMH_0036080	EMH_0053090	EMW_00023480	EMW_00023500	EMW_00023540	ENH_00011250	ENH_00032550	ENH_00034060	ENH_00034070	ENH_00034110	ENH_00034120	ENH_00034130	EPH_0004790	EPH_0004810	EPH_0004850	EPH_0075720
Eten4	EAH_00010760	EAH_00064180	EBH_0070490	EBH_0070500	EMH_0016070	EMW_00023160	EMW_00023170	ENH_00020520	ENH_00020530	EPH_0016320
Eten5	EAH_00016580	EBH_0016430	EMH_0057520	EMW_00016130	ENH_00066980	ENH_00066990	ENH_00067000	ENH_00067010	EPH_0030570
Eten6	EAH_00006000	EBH_0046730	EMH_0006040	EMW_00047180	ENH_00002490	EPH_0059470
ROP21/27	EAH_00057090	EAH_00057630	EBH_0029060	EMW_00052550	ENH_00010530
ROP35	EAH_00045380	EAH_00050320	EBH_0002260	EBH_0025260	EMH_0026440	EMH_0083730	EMW_00019770	ENH_00011700	ENH_00057200	EPH_0003380	EPH_0024640
Unique	EAH_00014120	EAH_00014170	EAH_00021280	EAH_00024410	EAH_00053570	EBH_0015070	EBH_0015100	EBH_0027910	EBH_0045030	EBH_0046560	EMH_0003990	EMH_0008250	EMH_0024250	EMH_0037600	EMH_0070730	EMH_0086440	EMW_00025440	EMW_00029010	EMW_00033310	EMW_00033540	ENH_00009670	ENH_00016500	ENH_00026510	ENH_00056490	ENH_00056530	ENH_00075210	EPH_0002380	EPH_0011160	EPH_0075010	EPH_0075060

## Sheet: ApiAP2 genes
Species	# Genes	# Domains	Ids
Babesia bovis	24	33	BBOV_I000100	BBOV_I002320	BBOV_I003560	BBOV_I004280	BBOV_I004850	BBOV_II001610	BBOV_II003230	BBOV_II004230	BBOV_II005480	BBOV_II005880	BBOV_II007120	BBOV_III000230	BBOV_III000570	BBOV_III003770	BBOV_III004090	BBOV_III004740	BBOV_III007040	BBOV_III007880	BBOV_III008870	BBOV_III009600	BBOV_IV000500	BBOV_IV002360	BBOV_IV011690	BBOV_IV011830
Cryptosporidium hominis	16	20	Chro.10392	Chro.20370	Chro.30233	Chro.30337	Chro.40076	Chro.40131	Chro.40212	Chro.40336	Chro.50121	Chro.50419	Chro.60146	Chro.60301	Chro.60360	Chro.80100	Chro.80364	Chro.80375
Cryptosporidium parvm	17	25	cgd1_3520	cgd2_3490	cgd3_1980	cgd3_2970	cgd4_1110	cgd4_1880	cgd4_2950	cgd4_3820	cgd4_600	cgd5_2570	cgd5_4250	cgd6_1140	cgd6_2600	cgd6_5320	cgd8_3130	cgd8_3230	cgd8_810
Eimeria acervulina	56	74	EAH_00000430	EAH_00000660	EAH_00000670	EAH_00002330	EAH_00002720	EAH_00003980	EAH_00009220	EAH_00010230	EAH_00010770	EAH_00010830	EAH_00011040	EAH_00013090	EAH_00013510	EAH_00014350	EAH_00015430	EAH_00015840	EAH_00018980	EAH_00021020	EAH_00021030	EAH_00022180	EAH_00022600	EAH_00023960	EAH_00028680	EAH_00030200	EAH_00030710	EAH_00031060	EAH_00032140	EAH_00032750	EAH_00032960	EAH_00036560	EAH_00039490	EAH_00039510	EAH_00040800	EAH_00040960	EAH_00041250	EAH_00042070	EAH_00042420	EAH_00042840	EAH_00043270	EAH_00044350	EAH_00044480	EAH_00044610	EAH_00045180	EAH_00045580	EAH_00046160	EAH_00048510	EAH_00050080
Eimeria brunetti	40	-	EBH_0006830	EBH_0008990	EBH_0010390	EBH_0012590	EBH_0013930	EBH_0015950	EBH_0016290	EBH_0020260	EBH_0020730	EBH_0022560	EBH_0023300	EBH_0026130	EBH_0026390	EBH_0026400	EBH_0028870	EBH_0029250	EBH_0029840	EBH_0030780	EBH_0030980	EBH_0032050	EBH_0033590	EBH_0033800	EBH_0042400	EBH_0043590	EBH_0044250	EBH_0045210	EBH_0049880	EBH_0050960	EBH_0054420	EBH_0054430	EBH_0055200	EBH_0056270	EBH_0057960	EBH_0058380	EBH_0058480	EBH_0067740	EBH_0068050	EBH_0075090	EBH_0080550	EBH_0086500
Eimeria maxima	42	57	EMW_00005330	EMW_00006540	EMW_00007120	EMW_00008360	EMW_00009640	EMW_00010400	EMW_00010800	EMW_00011230	EMW_00011720	EMW_00013110	EMW_00014890	EMW_00015550	EMW_00016230	EMW_00018350	EMW_00018700	EMW_00020080	EMW_00020120	EMW_00023090	EMW_00023370	EMW_00024270	EMW_00024620	EMW_00025060	EMW_00028110	EMW_00029230	EMW_00029950	EMW_00029960	EMW_00031740	EMW_00032200	EMW_00036730	EMW_00037370	EMW_00037550	EMW_00038940	EMW_00042270	EMW_00045060	EMW_00045620	EMW_00045820	EMW_00047030	EMW_00048440	EMW_00051840	EMW_00052130	EMW_00055100	EMW_00059100
Eimeria mitis	28	-	EMH_0005360	EMH_0009170	EMH_0017020	EMH_0018930	EMH_0019770	EMH_0031300	EMH_0040820	EMH_0041590	EMH_0050170	EMH_0050300	EMH_0051410	EMH_0051610	EMH_0052160	EMH_0057910	EMH_0058170	EMH_0058550	EMH_0059350	EMH_0060530	EMH_0060790	EMH_0065930	EMH_0067630	EMH_0068300	EMH_0069850	EMH_0076110	EMH_0076950	EMH_0088950	EMH_0093510	EMH_0097340
Eimeria necatrix	53	71	ENH_00003690	ENH_00003700	ENH_00006640	ENH_00010000	ENH_00010640	ENH_00013260	ENH_00013570	ENH_00016220	ENH_00016850	ENH_00020600	ENH_00020660	ENH_00021140	ENH_00021820	ENH_00026700	ENH_00027130	ENH_00027630	ENH_00031050	ENH_00033250	ENH_00035750	ENH_00036370	ENH_00036810	ENH_00036820	ENH_00038140	ENH_00040480	ENH_00041340	ENH_00046520	ENH_00049200	ENH_00049800	ENH_00050800	ENH_00052600	ENH_00052610	ENH_00055250	ENH_00056330	ENH_00057100	ENH_00057590	ENH_00057660	ENH_00060940	ENH_00064230	ENH_00065130	ENH_00065730	ENH_00067590	ENH_00068760	ENH_00069430	ENH_00072970	ENH_00073840	ENH_00074130	ENH_00077450
Eimeria praecox	30	-	EPH_0002730	EPH_0004360	EPH_0004700	EPH_0005260	EPH_0009800	EPH_0010990	EPH_0016400	EPH_0018380	EPH_0020220	EPH_0020350	EPH_0020460	EPH_0021120	EPH_0022330	EPH_0026060	EPH_0027340	EPH_0031050	EPH_0031170	EPH_0040510	EPH_0040520	EPH_0041530	EPH_0045860	EPH_0046460	EPH_0047730	EPH_0052810	EPH_0054010	EPH_0056120	EPH_0068110	EPH_0074340	EPH_0075950	EPH_0076240
Eimeria tenella	46	63	ETH_00000030.1	ETH_00000040.1	ETH_00001325.1	ETH_00002450.1	ETH_00003130.1	ETH_00006655.1	ETH_00007355.1	ETH_00007835.1	ETH_00008030.1	ETH_00008150.1	ETH_00009105.1	ETH_00009395.1	ETH_00009535.1	ETH_00009540.1	ETH_00011345.1	ETH_00013055.1	ETH_00013960.1	ETH_00013965.1	ETH_00014440.1	ETH_00014800.1	ETH_00016515.1	ETH_00016895.1	ETH_00016970.1	ETH_00017360.1	ETH_00017520.1	ETH_00020340.1	ETH_00020490.1	ETH_00022605.1	ETH_00023250.1	ETH_00024745.1	ETH_00026435.1	ETH_00027370.1	ETH_00027725.1	ETH_00028070.1	ETH_00028930.1	ETH_00031200.1	ETH_00031980.1	ETH_00032970.1	ETH_00033770.1	ETH_00034370.1	ETH_00036635.1	ETH_00037940.1	ETH_00038495.1	ETH_00038930.1	ETH_00042195.1	ETH_00042305.1
Neospora caninum	65	100	NCLIV_002930	NCLIV_007460	NCLIV_007810	NCLIV_009360	NCLIV_009480	NCLIV_009580	NCLIV_010930	NCLIV_011080	NCLIV_011370	NCLIV_012620	NCLIV_014510	NCLIV_016660	NCLIV_017050	NCLIV_019060	NCLIV_019680	NCLIV_019690	NCLIV_020020	NCLIV_021340	NCLIV_021360	NCLIV_021870	NCLIV_022440	NCLIV_023820	NCLIV_023830	NCLIV_0254	NCLIV_025610	NCLIV_028720	NCLIV_030300	NCLIV_032930	NCLIV_034030	NCLIV_034610	NCLIV_035780	NCLIV_037340	NCLIV_038720	NCLIV_040560	NCLIV_041960	NCLIV_042430	NCLIV_042620	NCLIV_044800	NCLIV_047580	NCLIV_048320	NCLIV_048470	NCLIV_050970	NCLIV_051170	NCLIV_051890	NCLIV_051990	NCLIV_052140	NCLIV_052260
Plasmodium berghei	28	50	PBANKA_010290	PBANKA_010950	PBANKA_011210	PBANKA_021440	PBANKA_052170	PBANKA_061240	PBANKA_083520	PBANKA_090590	PBANKA_090960	PBANKA_093230	PBANKA_093910	PBANKA_100180	PBANKA_101550	PBANKA_103430	PBANKA_112180	PBANKA_120590	PBANKA_122810	PBANKA_123160	PBANKA_131320	PBANKA_131970	PBANKA_132980	PBANKA_135600	PBANKA_136370	PBANKA_140370	PBANKA_141570	PBANKA_141810	PBANKA_143750	PBANKA_145370
Plasmodium chabaudi	27	48	PCHAS_010360	PCHAS_011010	PCHAS_011270	PCHAS_021280	PCHAS_052190	PCHAS_061410	PCHAS_070710	PCHAS_071090	PCHAS_083550	PCHAS_090520	PCHAS_091200	PCHAS_100270	PCHAS_101630	PCHAS_103510	PCHAS_112130	PCHAS_120660	PCHAS_122880	PCHAS_123220	PCHAS_131650	PCHAS_132300	PCHAS_133440	PCHAS_136060	PCHAS_136830	PCHAS_140560	PCHAS_141750	PCHAS_143950	PCHAS_145600
Plasmodium falciparum	31	55	PF3D7_0404100	PF3D7_0411000	PF3D7_0420300	PF3D7_0423000	PF3D7_0516800	PF3D7_0604100	PF3D7_0611200	PF3D7_0613800	PF3D7_0622900	PF3D7_0730300	PF3D7_0730500	PF3D7_0802100	PF3D7_0934400	PF3D7_1007700	PF3D7_1107800	PF3D7_1115500	PF3D7_1139300	PF3D7_1143100	PF3D7_1222400	PF3D7_1222600	PF3D7_1239200	PF3D7_1305200	PF3D7_1317200	PF3D7_1319600	PF3D7_1342900	PF3D7_1350900	PF3D7_1408200	PF3D7_1429200	PF3D7_1449500	PF3D7_1456000	PF3D7_1466400
Plasmodium knowlesi	32	57	PKH_011630	PKH_021500	PKH_021520	PKH_030380	PKH_031060	PKH_052480	PKH_073250	PKH_080640	PKH_090510	PKH_091270	PKH_093690	PKH_094060	PKH_101490	PKH_101600	PKH_112660	PKH_113520	PKH_113800	PKH_114550	PKH_121160	PKH_123920	PKH_125010	PKH_125680	PKH_125850	PKH_132110	PKH_133910	PKH_140370	PKH_141640	PKH_141880	PKH_143890	PKH_143910	PKH_145310	PKH_146720
Plasmodium vivax	32	55	PVX_000700	PVX_001040	PVX_080355	PVX_080410	PVX_081810	PVX_081820	PVX_083040	PVX_083440	PVX_085085	PVX_086035	PVX_086995	PVX_090110	PVX_090190	PVX_091065	PVX_091420	PVX_092570	PVX_092760	PVX_093635	PVX_094580	PVX_100910	PVX_113370	PVX_113695	PVX_113825	PVX_114260	PVX_117145	PVX_117665	PVX_118015	PVX_122095	PVX_122680	PVX_122795	PVX_123750	PVX_123760
Plasmodium yoelii	28	50	PY17X_0104500	PY17X_0111100	PY17X_0113700	PY17X_0215800	PY17X_0523100	PY17X_0614900	PY17X_0838600	PY17X_0907300	PY17X_0911000	PY17X_0934300	PY17X_0941600	PY17X_1003200	PY17X_1017000	PY17X_1036700	PY17X_1123200	PY17X_1209100	PY17X_1231600	PY17X_1235000	PY17X_1317000	PY17X_1323500	PY17X_1334500	PY17X_1361700	PY17X_1369400	PY17X_1405400	PY17X_1417400	PY17X_1419800	PY17X_1440000	PY17X_1456200
Theileria annulata	25	34	TA02615	TA04145	TA04435	TA05055	TA06995	TA07100	TA07550	TA08375	TA09965	TA10460	TA10940	TA11145	TA11665	TA12015	TA13395	TA13515	TA13690	TA16105	TA16485	TA16535	TA17415	TA18095	TA18375	TA19920	TA20595
Toxoplasma gondii	65	101	TGME49_202490	TGME49_203050	TGME49_203690	TGME49_203710	TGME49_205650	TGME49_208020	TGME49_211720	TGME49_214840	TGME49_214960	TGME49_215150	TGME49_215340	TGME49_215570	TGME49_215895	TGME49_216220	TGME49_217700	TGME49_218960	TGME49_220530	TGME49_224050	TGME49_224230	TGME49_225110	TGME49_226515	TGME49_229370	TGME49_233120	TGME49_237090	TGME49_237425	TGME49_240900	TGME49_244510	TGME49_246660	TGME49_247700	TGME49_247730	TGME49_249190	TGME49_250800	TGME49_251740	TGME49_252370	TGME49_253380	TGME49_255220	TGME49_262000	TGME49_262420	TGME49_264485	TGME49_267460	TGME49_267642	TGME49_269010	TGME49_271030	TGME49_272710	TGME49_273660	TGME49_280460	TGME49_280470
Theileria parva	24	32	TP01_0068	TP01_0491	TP01_0492	TP01_0780	TP01_1126	TP01_1139	TP02_0163	TP02_0226	TP02_0497	TP02_0534	TP03_0032	TP03_0093	TP03_0417	TP03_0526	TP03_0757	TP03_0825	TP03_0854	TP04_0175	TP04_0270	TP04_0428	TP04_0602	TP04_0692	TP04_0790	TP04_0872
[truncated: 18 more columns]

## Sheet: ApiAP2 clusters
Pan-apicomplexan
Coccidia-specific
Eimeria-specific
Orthologous group	Ids
apiap2_og_59	bbov|BBOV_III008870	emax|EMWEY_00037550	enec|ENH_00069430	eten|ETH_00017520.1	ncan|NCLIV_009480	pcha|PCHAS_120660	pcha|PCHAS_141750	pfal|PF3D7_1222400	pyoe|PY17X_1209100	pyoe|PY17X_1417400	tann|TA09965	tgon|TGME49_299020	tpar|TP04_0790	pfal|PF3D7_1007700	pkno|PKH_080640	pviv|PVX_094580	eace|EAH_00015430	ebru|EBH_0077910	emax|EMWEY_00052470	emit|EMH_0067980	enec|ENH_00049200	epra|EPH_0022420	eace|EAH_00040800	ebru|EBH_0050960	emax|EMWEY_00037560	emit|EMH_0067630	eten|ETH_00037030.1	ncan|NCLIV_070180	tgon|TGME49_306000	eace|EAH_00056900	emax|EMWEY_00059100	enec|ENH_00013260	ncan|NCLIV_048470	tgon|TGME49_224050	epra|EPH_0040520	eten|ETH_00038930.1	ebru|EBH_0050980	enec|ENH_00073070	ncan|NCLIV_050120	tgon|TGME49_235740	eten|ETH_00039595.1	ebru|EBH_0078020	epra|EPH_0066730	pber|PBANKA_120590	enec|ENH_00057590	ncan|NCLIV_019680	tgon|TGME49_280470	pber|PBANKA_141570
apiap2_og_90	bbov|BBOV_III007870	chom|Chro.60574	cpar|cgd4_1530	eace|EAH_00020420	emax|EMWEY_00020850	emit|EMH_0050580	enec|ENH_00011100	epra|EPH_0025640	eten|ETH_00032180.1	ncan|NCLIV_048960	pfal|PF3D7_1120400	pkno|PKH_091780	pviv|PVX_091652	tgon|TGME49_223510	tpar|TP04_0691	bbov|BBOV_III007880	tann|TA10460	tpar|TP04_0692	bbov|BBOV_IV005690	eace|EAH_00055030	enec|ENH_00067770	eten|ETH_00001930.1	ncan|NCLIV_025340	pber|PBANKA_100150	pcha|PCHAS_100240	pfal|PF3D7_0403800	pkno|PKH_031090	pviv|PVX_093510	pyoe|PY17X_1002900	tann|TA04130	tgon|TGME49_262490	tpar|TP03_0361	chom|Chro.40175	cpar|cgd6_4990	pkno|PKH_011360	pcha|PCHAS_122620	pyoe|PY17X_1228800	pber|PBANKA_122560	pfal|PF3D7_0805000	epra|EPH_0014780
apiap2_og_336	bbov|BBOV_IV001060	tann|TA19000	tpar|TP01_0128	bbov|BBOV_IV010220	tpar|TP01_0780	bbov|BBOV_IV011130	chom|Chro.40107	cpar|cgd4_880	eace|EAH_00007850	ebru|EBH_0062750	emax|EMWEY_00013570	emit|EMH_0041110	eten|ETH_00035895.1	ncan|NCLIV_059260	pber|PBANKA_121300	pcha|PCHAS_121370	pfal|PF3D7_1014600	pkno|PKH_081460	pviv|PVX_094945	pyoe|PY17X_1216200	tann|TA06995	tgon|TGME49_217050	tpar|TP01_0779	enec|ENH_00085950	epra|EPH_0035950	epra|EPH_0016740	eten|ETH_00029605.1
apiap2_og_456	bbov|BBOV_I004850	chom|Chro.40131	enec|ENH_00036810	eten|ETH_00009540.1	pber|PBANKA_123160	pcha|PCHAS_123220	pfal|PF3D7_0516800	pkno|PKH_101600	pyoe|PY17X_1235000	tann|TA05055	tpar|TP03_0526	cpar|cgd4_1110	ebru|EBH_0054430	emit|EMH_0017020	epra|EPH_0020460	ncan|NCLIV_028720	tgon|TGME49_255220	eace|EAH_00000660	emax|EMWEY_00024260	enec|ENH_00036800	eten|ETH_00009545.1	ncan|NCLIV_040560	pviv|PVX_080410	tgon|TGME49_264485
apiap2_og_546	bbov|BBOV_IV007160	chom|Chro.60262	cpar|cgd6_2240	eace|EAH_00028240	ebru|EBH_0085830	emax|EMWEY_00039000	emit|EMH_0093100	enec|ENH_00072790	epra|EPH_0074110	eten|ETH_00027950.1	ncan|NCLIV_023150	pber|PBANKA_143620	pcha|PCHAS_143820	pfal|PF3D7_1221000	pkno|PKH_143760	pviv|PVX_123685	pyoe|PY17X_1438600	tann|TA20495	tgon|TGME49_201250	tpar|TP01_0511	emit|EMH_0095560	ncan|NCLIV_022440	tgon|TGME49_202490
apiap2_og_571	eten|ETH_00003130.1	eten|ETH_00031200.1	pkno|PKH_021500	eace|EAH_00051470	ebru|EBH_0066540	emax|EMWEY_00045820	emit|EMH_0092750	enec|ENH_00073840	ncan|NCLIV_061420	tgon|TGME49_218960	eace|EAH_00059560	ebru|EBH_0044250	emit|EMH_0093510	epra|EPH_0056120	epra|EPH_0067850	pber|PBANKA_021440	pcha|PCHAS_021280	pfal|PF3D7_0730300	pviv|PVX_081810	pyoe|PY17X_0215800	ncan|NCLIV_009360	tgon|TGME49_299150
apiap2_og_724	bbov|BBOV_II004230	emax|EMWEY_00029960	ncan|NCLIV_058430	tann|TA07100	tpar|TP04_0175	eace|EAH_00021020	ebru|EBH_0026390	emax|EMWEY_00008580	emit|EMH_0018920	enec|ENH_00052600	epra|EPH_0005260	eten|ETH_00013965.1	pber|PBANKA_052170	pcha|PCHAS_052190	pfal|PF3D7_0420300	pkno|PKH_052480	pviv|PVX_090110	pyoe|PY17X_0523100	tgon|TGME49_315760	ncan|NCLIV_034610	tgon|TGME49_272710
apiap2_og_991	bbov|BBOV_III003770	chom|Chro.80100	cpar|cgd8_810	eace|EAH_00052610	emax|EMWEY_00005330	eten|ETH_00016895.1	tann|TA12015	tpar|TP02_0226	eten|ETH_00016890.1	ebru|EBH_0028760	emit|EMH_0082540	enec|ENH_00038710	epra|EPH_0055380	emax|EMWEY_00005340	ebru|EBH_0028780	emit|EMH_0091370	enec|ENH_00018370	ncan|NCLIV_038200	tgon|TGME49_200350	emit|EMH_0082550
apiap2_og_1165	eace|EAH_00018960	emit|EMH_0071500	eten|ETH_00034370.1	ncan|NCLIV_057200	tgon|TGME49_314000	eace|EAH_00018980	ebru|EBH_0080550	emax|EMWEY_00047030	emit|EMH_0050170	enec|ENH_00057650	epra|EPH_0045860	eten|ETH_00033770.1	ebru|EBH_0029250	enec|ENH_00057660	epra|EPH_0054800	emit|EMH_0085290	enec|ENH_00014740	eten|ETH_00003390.1	ncan|NCLIV_034030	tgon|TGME49_273660
apiap2_og_1246	bbov|BBOV_II005480	eace|EAH_00013090	emax|EMWEY_00032200	emit|EMH_0050300	enec|ENH_00035750	eten|ETH_00001325.1	pber|PBANKA_143750	pcha|PCHAS_143950	pfal|PF3D7_1222600	pkno|PKH_143910	pviv|PVX_123760	pyoe|PY17X_1440000	tann|TA13515	tpar|TP02_0497	ebru|EBH_0060720	epra|EPH_0006300	tgon|TGME49_220530	ebru|EBH_0065580	epra|EPH_0006320
apiap2_og_1428	pviv|PVX_110895	pviv|PVX_250300	bbov|BBOV_III010060	chom|Chro.80141	cpar|cgd8_1210	eace|EAH_00019420	ebru|EBH_0032050	enec|ENH_00049010	eten|ETH_00011560.1	ncan|NCLIV_066020	pber|PBANKA_052020	pcha|PCHAS_052040	pfal|PF3D7_1037300	pkno|PKH_062160	pyoe|PY17X_0521300	tann|TA11570	tgon|TGME49_249900	tpar|TP02_0141
apiap2_og_1732	ncan|NCLIV_007460	ncan|NCLIV_069580	eace|EAH_00045650	ebru|EBH_0008990	emax|EMWEY_00050460	emit|EMH_0036730	enec|ENH_00010000	eten|ETH_00013055.1	tgon|TGME49_252370	epra|EPH_0010380	pkno|PKH_112660	pviv|PVX_114260	emax|EMWEY_00047920	pber|PBANKA_112180	pcha|PCHAS_112130	pfal|PF3D7_0622900	pyoe|PY17X_1123200
apiap2_og_1739	pfal|PF3D7_1233200.1	pfal|PF3D7_1233200.2	chom|Chro.70183	cpar|cgd7_1550	enec|ENH_00016850	pber|PBANKA_144790	pcha|PCHAS_145020	pkno|PKH_145040	pviv|PVX_100615	pyoe|PY17X_1450400	eace|EAH_00045970	ebru|EBH_0051060	emax|EMWEY_00038940	emit|EMH_0054220	epra|EPH_0026060	ncan|NCLIV_041960	tgon|TGME49_289710
apiap2_og_1969	eace|EAH_00045170	ebru|EBH_0077450	epra|EPH_0058690	eten|ETH_00013580.1	eace|EAH_00045180	ebru|EBH_0057960	emax|EMWEY_00052130	emit|EMH_0058170	enec|ENH_00068760	epra|EPH_0022920	ncan|NCLIV_011080	emit|EMH_0093160	ncan|NCLIV_044110	tgon|TGME49_206330	tgon|TGME49_318470	eten|ETH_00042840.1	eten|ETH_00002145.1
apiap2_og_2209	eace|EAH_00044610	ebru|EBH_0035170	emax|EMWEY_00031740	emit|EMH_0043380	enec|ENH_00031050	eten|ETH_00028070.1	tgon|TGME49_205650	ebru|EBH_0035180	epra|EPH_0035560	pcha|PCHAS_131650	ncan|NCLIV_020020	pber|PBANKA_131320	pfal|PF3D7_1449500	pkno|PKH_125680	pviv|PVX_118015	pyoe|PY17X_1317000
apiap2_og_2283	bbov|BBOV_III000570	eace|EAH_00015840	ebru|EBH_0058380	emax|EMWEY_00007120	enec|ENH_00008320	ncan|NCLIV_009580	pber|PBANKA_010950	pcha|PCHAS_011010	pfal|PF3D7_0611200	pkno|PKH_113800	pviv|PVX_113695	pyoe|PY17X_0111100	tann|TA18095	tgon|TGME49_320700	tpar|TP03_0757
apiap2_og_2387	chom|Chro.80364	cpar|cgd8_3130	eace|EAH_00058530	enec|ENH_00049800	eten|ETH_00009105.1	ncan|NCLIV_044800	pber|PBANKA_131970	pcha|PCHAS_132300	pfal|PF3D7_1456000	pkno|PKH_125010	pviv|PVX_117665	pyoe|PY17X_1323500	tgon|TGME49_306620	ebru|EBH_0077330	epra|EPH_0014010
apiap2_og_2398	eace|EAH_00003980	ebru|EBH_0020260	emax|EMWEY_00018350	emit|EMH_0060790	enec|ENH_00074130	epra|EPH_0021120	eten|ETH_00022605.1	eace|EAH_00003990	ebru|EBH_0020250	emax|EMWEY_00018360	emit|EMH_0058570	enec|ENH_00074120	eten|ETH_00022600.1	ncan|NCLIV_036580	tgon|TGME49_270010
apiap2_og_2427	eace|EAH_00021030	ebru|EBH_0026400	emax|EMWEY_00029950	emit|EMH_0018930	enec|ENH_00052610	epra|EPH_0005250	eten|ETH_00013960.1	ncan|NCLIV_066800	pber|PBANKA_100180	pcha|PCHAS_100270	pfal|PF3D7_0404100	pkno|PKH_031060	pviv|PVX_001040	pyoe|PY17X_1003200	tgon|TGME49_251740
apiap2_og_2503	bbov|BBOV_I000100	enec|ENH_00065130	eten|ETH_00027725.1	ncan|NCLIV_066150	pber|PBANKA_083520	pcha|PCHAS_083550	pfal|PF3D7_0934400	pkno|PKH_073250	pviv|PVX_086995	pyoe|PY17X_0838600	tann|TA17415	tpar|TP03_0854	eace|EAH_00034500	emit|EMH_0022910
apiap2_og_2513	bbov|BBOV_I004280	eace|EAH_00054650	enec|ENH_00081210	ncan|NCLIV_059950	pber|PBANKA_090590	pcha|PCHAS_070710	pfal|PF3D7_1143100	pkno|PKH_094060	pviv|PVX_092760	pyoe|PY17X_0907300	tann|TA16105	tgon|TGME49_216220	emit|EMH_0095050	epra|EPH_0059640
apiap2_og_2539	bbov|BBOV_III004090	ncan|NCLIV_042430	pber|PBANKA_140370	pcha|PCHAS_140560	pfal|PF3D7_1305200	pkno|PKH_140370	pviv|PVX_122095	pyoe|PY17X_1405400	tann|TA02615	tgon|TGME49_290180	tpar|TP03_0032	ebru|EBH_0081860	enec|ENH_00041340	eten|ETH_00042195.1
apiap2_og_2604	cpar|cgd6_5320	pber|PBANKA_090960	pcha|PCHAS_071090	pfal|PF3D7_1139300	pviv|PVX_092570	pyoe|PY17X_0911000	eace|EAH_00022830	ebru|EBH_0026080	emit|EMH_0054650	epra|EPH_0038440	eten|ETH_00017255.1	ncan|NCLIV_063940	tgon|TGME49_247730	pkno|PKH_093690
apiap2_og_2657	eace|EAH_00055780	emax|EMWEY_00047720	emit|EMH_0045180	enec|ENH_00004650	epra|EPH_0026080	eten|ETH_00009390.1	eace|EAH_00059490	ebru|EBH_0033590	emax|EMWEY_00051840	emit|EMH_0040820	enec|ENH_00056330	epra|EPH_0066510	eten|ETH_00009395.1	emit|EMH_0073360
apiap2_og_2697	bbov|BBOV_I002320	eace|EAH_00032750	enec|ENH_00003700	tann|TA04145	tpar|TP03_0093	ebru|EBH_0010400	emax|EMWEY_00020120	emit|EMH_0049230	enec|ENH_00003690	epra|EPH_0074320	eten|ETH_00035590.1	ebru|EBH_0071870	eten|ETH_00043885.1
apiap2_og_2711	bbov|BBOV_II001610	chom|Chro.20370	cpar|cgd2_3490	ncan|NCLIV_054950	pber|PBANKA_132980	pcha|PCHAS_133440	pfal|PF3D7_1466400	pkno|PKH_123920	pviv|PVX_117145	pyoe|PY17X_1334500	tann|TA08375	tgon|TGME49_310950	tpar|TP04_0428
apiap2_og_2721	bbov|BBOV_II005870	eace|EAH_00047750	emax|EMWEY_00030650	enec|ENH_00049770	eten|ETH_00009090.1	ncan|NCLIV_042620	tann|TA13700	tgon|TGME49_290630	ebru|EBH_0022670	emit|EMH_0095600	epra|EPH_0027490	epra|EPH_0027480	emit|EMH_0074260
apiap2_og_2930	bbov|BBOV_III004740	eten|ETH_00042305.1	ncan|NCLIV_025610	pber|PBANKA_093230	pcha|PCHAS_091200	pfal|PF3D7_1115500	pkno|PKH_091270	pviv|PVX_091420	pyoe|PY17X_0934300	tann|TA13395	tgon|TGME49_262000	eace|EAH_00023970
apiap2_og_2932	bbov|BBOV_III005780	eace|EAH_00030710	ebru|EBH_0012590	emax|EMWEY_00048440	enec|ENH_00079540	eten|ETH_00023250.1	ncan|NCLIV_050970	tann|TA12840	tgon|TGME49_237090	tpar|TP02_0375	emit|EMH_0075360	epra|EPH_0002730
apiap2_og_2992	eace|EAH_00000430	ebru|EBH_0043590	emax|EMWEY_00043490	emit|EMH_0019770	enec|ENH_00046520	epra|EPH_0044390	eten|ETH_00016790.1	emit|EMH_0019760	enec|ENH_00011220	eten|ETH_00042625.1	epra|EPH_0044130	eten|ETH_00002460.1
apiap2_og_3112	bbov|BBOV_I003560	tann|TA20595	tpar|TP01_0491	ncan|NCLIV_025360	pviv|PVX_091620	tgon|TGME49_262470	pber|PBANKA_092840	pcha|PCHAS_091590	pfal|PF3D7_1119700	pyoe|PY17X_0930400	pkno|PKH_091710
apiap2_og_3273	eace|EAH_00028680	ebru|EBH_0055200	emax|EMWEY_00026430	emit|EMH_0058550	enec|ENH_00057100	eten|ETH_00026435.1	ebru|EBH_0011190	emax|EMWEY_00026410	epra|EPH_0016470	ncan|NCLIV_051170	tgon|TGME49_237425
apiap2_og_3395	eace|EAH_00041250	epra|EPH_0018380	emax|EMWEY_00042270	emit|EMH_0060530	enec|ENH_00014050	eten|ETH_00035370.1	ncan|NCLIV_021870	tgon|TGME49_203050	pkno|PKH_143890	pviv|PVX_123750
apiap2_og_3400	enec|ENH_00027130	epra|EPH_0075950	eten|ETH_00020490.1	eace|EAH_00039510	ebru|EBH_0030980	emax|EMWEY_00015550	emit|EMH_0035190	ncan|NCLIV_021340	tgon|TGME49_203710	emit|EMH_0076950
apiap2_og_3465	eace|EAH_00002720	ebru|EBH_0029840	emax|EMWEY_00023090	emit|EMH_0065520	emit|EMH_0069850	enec|ENH_00060940	epra|EPH_0010990	eten|ETH_00011345.1	ncan|NCLIV_048320	tgon|TGME49_224230
apiap2_og_3475	eace|EAH_00011040	ebru|EBH_0036000	emax|EMWEY_00018700	emit|EMH_0031010	enec|ENH_00036370	epra|EPH_0014040	ncan|NCLIV_016660	epra|EPH_0014030	eten|ETH_00041475.1	tgon|TGME49_240460
apiap2_og_3516	eace|EAH_00036560	ebru|EBH_0003170	emax|EMWEY_00029230	emit|EMH_0057910	enec|ENH_00045980	epra|EPH_0037000	eten|ETH_00007835.1	ncan|NCLIV_021360	tgon|TGME49_203690	eten|ETH_00040560.1
apiap2_og_3531	eace|EAH_00042420	ebru|EBH_0016290	emax|EMWEY_00024620	emit|EMH_0076110	enec|ENH_00086380	epra|EPH_0031170	eten|ETH_00017360.1	eten|ETH_00037285.1	ncan|NCLIV_032930	tgon|TGME49_233120
apiap2_og_3540	eace|EAH_00045580	ebru|EBH_0074300	emax|EMWEY_00011230	emit|EMH_0095620	enec|ENH_00080590	eten|ETH_00037765.1	tgon|TGME49_215895	enec|ENH_00072970	eten|ETH_00033610.1	ncan|NCLIV_060240
apiap2_og_3637	emax|EMWEY_00020080	eace|EAH_00050080	ebru|EBH_0075090	emit|EMH_0097340	enec|ENH_00027630	epra|EPH_0046230	eten|ETH_00006655.1	tgon|TGME49_310900	ncan|NCLIV_054920
apiap2_og_3656	bbov|BBOV_II007120	pber|PBANKA_010290	pcha|PCHAS_010360	pfal|PF3D7_0604100	pkno|PKH_114550	pviv|PVX_113370	pyoe|PY17X_0104500	tann|TA11665	tpar|TP02_0163
apiap2_og_3683	enec|ENH_00026700	eten|ETH_00028930.1	eace|EAH_00031060	ebru|EBH_0068050	emax|EMWEY_00002130	emit|EMH_0011120	epra|EPH_0074340	ncan|NCLIV_053760	tgon|TGME49_309410
apiap2_og_3725	bbov|BBOV_IV011830	pber|PBANKA_145370	pcha|PCHAS_145600	pfal|PF3D7_1239200	pkno|PKH_145310	pviv|PVX_100910	pyoe|PY17X_1456200	tann|TA16485	tpar|TP01_1126
apiap2_og_3761	enec|ENH_00050800	eace|EAH_00058170	ebru|EBH_0027780	emax|EMWEY_00031250	emit|EMH_0077870	eten|ETH_00024745.1	ncan|NCLIV_052140	ebru|EBH_0027810	tgon|TGME49_215150
apiap2_og_3770	eace|EAH_00000670	ebru|EBH_0054420	emax|EMWEY_00024270	emit|EMH_0017130	enec|ENH_00036820	epra|EPH_0020350	eten|ETH_00009535.1	ncan|NCLIV_030300	tgon|TGME49_229370
apiap2_og_3783	eace|EAH_00002330	ebru|EBH_0015950	emax|EMWEY_00037370	emit|EMH_0041590	enec|ENH_00013570	epra|EPH_0004360	eten|ETH_00014440.1	ncan|NCLIV_023820	tgon|TGME49_282210
apiap2_og_3922	eace|EAH_00022600	ebru|EBH_0020730	emax|EMWEY_00028110	emit|EMH_0059350	enec|ENH_00085730	epra|EPH_0004700	eten|ETH_00014800.1	ncan|NCLIV_017050	tgon|TGME49_240900
apiap2_og_3956	eace|EAH_00030200	ebru|EBH_0067740	emax|EMWEY_00010800	emit|EMH_0031300	enec|ENH_00016220	epra|EPH_0046460	eten|ETH_00007640.1	ncan|NCLIV_051990	tgon|TGME49_214960
apiap2_og_3996	eace|EAH_00039490	ebru|EBH_0023300	emax|EMWEY_00033830	emit|EMH_0042290	enec|ENH_00021140	epra|EPH_0047730	eten|ETH_00032970.1	ncan|NCLIV_023830	tgon|TGME49_282220
apiap2_og_4112	emit|EMH_0051610	emit|EMH_0096430	eace|EAH_00044480	ebru|EBH_0006830	enec|ENH_00040480	eten|ETH_00031980.1	ncan|NCLIV_007810	tgon|TGME49_253380
apiap2_og_4170	chom|Chro.50121	cpar|cgd5_2570	enec|ENH_00070580	eten|ETH_00035235.1	ncan|NCLIV_066340	tgon|TGME49_250800	ncan|NCLIV_035650	tgon|TGME49_271200
apiap2_og_4231	eace|EAH_00010770	ebru|EBH_0045210	emax|EMWEY_00025060	emit|EMH_0088950	enec|ENH_00020600	epra|EPH_0020220	eten|ETH_00000040.1	emit|EMH_0016060
apiap2_og_4326	eace|EAH_00042840	ebru|EBH_0030780	emax|EMWEY_00036730	emit|EMH_0094540	enec|ENH_00006640	epra|EPH_0052810	eten|ETH_00002450.1	emit|EMH_0037780
apiap2_og_4334	eace|EAH_00044350	ebru|EBH_0026130	emax|EMWEY_00055100	emit|EMH_0031100	enec|ENH_00014450	epra|EPH_0020810	ncan|NCLIV_062490	tgon|TGME49_217700
apiap2_og_4393	eace|EAH_00067000	ebru|EBH_0028870	emax|EMWEY_00023370	ncan|NCLIV_014510	tgon|TGME49_285895	epra|EPH_0068110	enec|ENH_00033250	eten|ETH_00008150.1
apiap2_og_4468	ncan|NCLIV_065400	pber|PBANKA_136370	pcha|PCHAS_136830	pfal|PF3D7_1350900	pkno|PKH_125850	pviv|PVX_083440	pyoe|PY17X_1369400	tgon|TGME49_249190
apiap2_og_4656	eace|EAH_00010230	ebru|EBH_0086500	emax|EMWEY_00006540	emit|EMH_0005360	enec|ENH_00067590	epra|EPH_0076240	eten|ETH_00016970.1
apiap2_og_4667	eace|EAH_00010830	ebru|EBH_0001260	emax|EMWEY_00013110	emit|EMH_0020570	enec|ENH_00020660	epra|EPH_0008850	eten|ETH_00000030.1
apiap2_og_4690	eace|EAH_00013510	emax|EMWEY_00009640	emit|EMH_0028400	enec|ENH_00064230	epra|EPH_0045150	eten|ETH_00027370.1	ebru|EBH_0036090
apiap2_og_4696	eace|EAH_00014350	ebru|EBH_0023380	emax|EMWEY_00008360	emit|EMH_0026730	enec|ENH_00038140	epra|EPH_0031050	eten|ETH_00020340.1
apiap2_og_4741	eace|EAH_00019070	ebru|EBH_0013930	emax|EMWEY_00014890	emit|EMH_0065930	enec|ENH_00077450	epra|EPH_0054010	eten|ETH_00007355.1
apiap2_og_4756	eace|EAH_00022180	ebru|EBH_0033800	emax|EMWEY_00045060	emit|EMH_0052160	enec|ENH_00065730	epra|EPH_0016400	eten|ETH_00008030.1
apiap2_og_4769	eace|EAH_00023960	ebru|EBH_0024730	emax|EMWEY_00010400	emit|EMH_0051410	enec|ENH_00045480	epra|EPH_0009800	eten|ETH_00033180.1
apiap2_og_4835	eace|EAH_00032960	emax|EMWEY_00011710	enec|ENH_00021820	ebru|EBH_0049880	emax|EMWEY_00011720	epra|EPH_0044950	eten|ETH_00037940.1
apiap2_og_4890	eace|EAH_00042070	ebru|EBH_0056260	emax|EMWEY_00047740	emit|EMH_0045440	epra|EPH_0013640	enec|ENH_00009250	eten|ETH_00032475.1
apiap2_og_4895	eace|EAH_00043270	ebru|EBH_0058480	emax|EMWEY_00036010	emit|EMH_0093970	epra|EPH_0037270	eten|ETH_00035645.1	emit|EMH_0079930
apiap2_og_4993	eace|EAH_00058150	ebru|EBH_0063270	emax|EMWEY_00017750	emit|EMH_0064240	enec|ENH_00010640	epra|EPH_0023150	eten|ETH_00016515.1
apiap2_og_5107	bbov|BBOV_III009600	ncan|NCLIV_035780	tann|TA11145	tgon|TGME49_271030	tpar|TP04_0872	pfal|PF3D7_0802100
apiap2_og_5256	eace|EAH_00032140	ebru|EBH_0022560	epra|EPH_0006030	emit|EMH_0071570	enec|ENH_00081080	eten|ETH_00038495.1
apiap2_og_5309	eace|EAH_00046160	ebru|EBH_0043820	emax|EMWEY_00019200	emit|EMH_0040210	epra|EPH_0026760	eten|ETH_00040735.1
apiap2_og_5400	pfal|PF3D7_1342900	pber|PBANKA_135600	pcha|PCHAS_136060	pkno|PKH_121160	pviv|PVX_083040	pyoe|PY17X_1361700
apiap2_og_5429	pfal|PF3D7_1429200	pber|PBANKA_101550	pcha|PCHAS_101630	pkno|PKH_132110	pviv|PVX_085085	pyoe|PY17X_1017000
apiap2_og_5432	pviv|PVX_091065	pber|PBANKA_093910	pcha|PCHAS_090520	pfal|PF3D7_1107800	pkno|PKH_090510	pyoe|PY17X_0941600
apiap2_og_5484	pber|PBANKA_011210	pcha|PCHAS_011270	pfal|PF3D7_0613800	pkno|PKH_113520	pviv|PVX_113825	pyoe|PY17X_0113700
apiap2_og_5633	pber|PBANKA_052340	pcha|PCHAS_052360	pfal|PF3D7_0423000	pkno|PKH_052660	pviv|PVX_090190	pyoe|PY17X_0524800
apiap2_og_5661	pber|PBANKA_061240	pcha|PCHAS_061410	pkno|PKH_030380	pviv|PVX_000700	pyoe|PY17X_0614900	pfal|PF3D7_0411000
apiap2_og_5994	pber|PBANKA_103430	pcha|PCHAS_103510	pfal|PF3D7_1408200	pkno|PKH_133910	pviv|PVX_086035	pyoe|PY17X_1036700
apiap2_og_6387	pber|PBANKA_141810	pcha|PCHAS_141990	pfal|PF3D7_1319600	pkno|PKH_141880	pviv|PVX_122795	pyoe|PY17X_1419800
apiap2_og_6604	eace|EAH_00009220	ebru|EBH_0042400	emax|EMWEY_00045620	emit|EMH_0068300	eten|ETH_00036635.1
apiap2_og_6700	eace|EAH_00035590	ebru|EBH_0022090	emit|EMH_0009170	enec|ENH_00001950	eten|ETH_00042390.1
apiap2_og_6957	pber|PBANKA_122810	pcha|PCHAS_122880	pkno|PKH_011630	pyoe|PY17X_1231600	pviv|PVX_093635
apiap2_og_7613	bbov|BBOV_II003230	tann|TA07550	tpar|TP04_0270
apiap2_og_7637	bbov|BBOV_II005880	tann|TA13690	tpar|TP02_0534
apiap2_og_7655	bbov|BBOV_III000230	tann|TA18375	tpar|TP03_0825
apiap2_og_7722	bbov|BBOV_III007040	tann|TA10940	tpar|TP04_0602
apiap2_og_7771	bbov|BBOV_IV000500	tann|TA19920	tpar|TP01_0068
apiap2_og_7794	bbov|BBOV_IV002360	tann|TA04435	tpar|TP03_0417
apiap2_og_7871	bbov|BBOV_IV011690	tann|TA16535	tpar|TP01_1139
apiap2_og_7894	chom|Chro.60360	ncan|NCLIV_051390	tgon|TGME49_214140
apiap2_og_7963	eace|EAH_00040960	ebru|EBH_0061000	emax|EMWEY_00016230
apiap2_og_7979	eace|EAH_00048510	ncan|NCLIV_063450	tgon|TGME49_246660
apiap2_og_8283	pfal|PF3D7_0730500	pkno|PKH_021520	pviv|PVX_081820
apiap2_og_8648	cpar|cgd4_1880	chom|Chro.40212
apiap2_og_8783	chom|Chro.10392	cpar|cgd1_3520
apiap2_og_9057	chom|Chro.30233	cpar|cgd3_1980
apiap2_og_9079	chom|Chro.30337	cpar|cgd3_2970
apiap2_og_9152	chom|Chro.40076	cpar|cgd4_600
apiap2_og_9226	chom|Chro.40336	cpar|cgd4_2950
apiap2_og_9268	chom|Chro.40435	cpar|cgd4_3820
apiap2_og_9443	chom|Chro.50419	cpar|cgd5_4250
apiap2_og_9513	chom|Chro.60146	cpar|cgd6_1140
apiap2_og_9563	chom|Chro.60301	cpar|cgd6_2600
apiap2_og_10001	chom|Chro.80375	cpar|cgd8_3230
apiap2_og_10960	enec|ENH_00055250	eten|ETH_00003600.1
apiap2_og_11360	ncan|NCLIV_002930	tgon|TGME49_208020
apiap2_og_11546	ncan|NCLIV_010930	tgon|TGME49_318610
apiap2_og_11550	ncan|NCLIV_011370	tgon|TGME49_211720
apiap2_og_11584	ncan|NCLIV_012620	tgon|TGME49_220520
apiap2_og_11747	ncan|NCLIV_019060	tgon|TGME49_244510
apiap2_og_11764	ncan|NCLIV_019690	tgon|TGME49_280460
apiap2_og_11906	ncan|NCLIV_0254	tgon|TGME49_262420
apiap2_og_12199	ncan|NCLIV_037340	tgon|TGME49_269010
apiap2_og_12236	ncan|NCLIV_038720	tgon|TGME49_267460
apiap2_og_12304	ncan|NCLIV_041340	tgon|TGME49_288950
apiap2_og_12447	ncan|NCLIV_047580	tgon|TGME49_225110
apiap2_og_12543	ncan|NCLIV_051890	tgon|TGME49_214840
apiap2_og_12555	ncan|NCLIV_052260	tgon|TGME49_215340
apiap2_og_12562	ncan|NCLIV_052490	tgon|TGME49_215570
apiap2_og_12814	ncan|NCLIV_063920	tgon|TGME49_247700
apiap2_og_13070	pkno|PKH_101490	pviv|PVX_080355
apiap2_og_13110	pkno|PKH_141640	pviv|PVX_122680
