# Supplementary material for: Genomic analysis of the causative agents of coccidiosis in domestic chickens
Source: HighWire-hosted journal article supplement (doi:10.1101/gr.168955.113), 2014-07-11
Supplement: Dataset_S2.xlsx [file Dataset_S2.xlsx]

## Sheet: E. tenella vs. others
			E. acervulina			E. brunetti			E. maxima			E. mitis			E. necatrix			E. praecox
ID	# comparisons	Mean Ka/Ks	Ka	Ks	Ka/Ks	Ka	Ks	Ka/Ks	Ka	Ks	Ka/Ks	Ka	Ks	Ka/Ks	Ka	Ks	Ka/Ks	Ka	Ks	Ka/Ks	Product
ETH_00024515	1	3.74	na	na	na	na	na	na	na	na	na	na	na	na	0.05	0.01	3.74	na	na	na	hypothetical protein
ETH_00026535	1	3.13	na	na	na	na	na	na	na	na	na	na	na	na	0.13	0.04	3.13	na	na	na	hypothetical protein
ETH_00014390	1	2.63	na	na	na	na	na	na	na	na	na	na	na	na	0.05	0.02	2.63	na	na	na	hypothetical protein
ETH_00018625	1	2.5	na	na	na	na	na	na	na	na	na	na	na	na	0.09	0.04	2.5	na	na	na	hypothetical protein
ETH_00036965	1	2.25	NaN	NaN	NaN	0.89	0.4	2.25	NaN	NaN	NaN	na	na	na	na	na	na	NaN	NaN	NaN	na
ETH_00022680	1	2.24	na	na	na	na	na	na	na	na	na	na	na	na	0.07	0.03	2.24	na	na	na	hypothetical protein
ETH_00015435	1	2.04	na	na	na	na	na	na	na	na	na	na	na	na	0.03	0.02	2.04	na	na	na	hypothetical protein
ETH_00031235	1	2	na	na	na	na	na	na	na	na	na	na	na	na	0.12	0.06	2	na	na	na	hypothetical protein
ETH_00024625	1	1.93	na	na	na	na	na	na	na	na	na	na	na	na	0.07	0.04	1.93	na	na	na	hypothetical protein
ETH_00042340	1	1.85	na	na	na	na	na	na	na	na	na	na	na	na	0.14	0.07	1.85	na	na	na	hypothetical protein
ETH_00018840	1	1.83	na	na	na	na	na	na	na	na	na	na	na	na	0.09	0.05	1.83	na	na	na	hypothetical protein
ETH_00036615	1	1.72	na	na	na	na	na	na	na	na	na	na	na	na	0.13	0.08	1.72	na	na	na	na
ETH_00008145	1	1.71	na	na	na	na	na	na	na	na	na	na	na	na	0.26	0.15	1.71	na	na	na	hypothetical protein
ETH_00006450	1	1.62	na	na	na	na	na	na	na	na	na	na	na	na	0.05	0.03	1.62	na	na	na	hypothetical protein
ETH_00017705	1	1.53	na	na	na	na	na	na	na	na	na	na	na	na	0.05	0.03	1.53	na	na	na	hypothetical protein
ETH_00036445	1	1.4	na	na	na	na	na	na	na	na	na	na	na	na	0.36	0.25	1.4	na	na	na	hypothetical protein
ETH_00035095	1	1.36	na	na	na	na	na	na	na	na	na	na	na	na	0.1	0.07	1.36	na	na	na	hypothetical protein
ETH_00002125	1	1.33	na	na	na	na	na	na	na	na	na	na	na	na	0.21	0.16	1.33	na	na	na	hypothetical protein
ETH_00004275	1	1.32	na	na	na	na	na	na	na	na	na	na	na	na	0.09	0.07	1.32	na	na	na	hypothetical protein
ETH_00030925	1	1.32	na	na	na	na	na	na	na	na	na	na	na	na	0.04	0.03	1.32	na	na	na	hypothetical protein
ETH_00003685	1	1.28	na	na	na	na	na	na	na	na	na	na	na	na	0.05	0.04	1.28	na	na	na	hypothetical protein
ETH_00004515	1	1.25	na	na	na	na	na	na	na	na	na	na	na	na	0.13	0.1	1.25	na	na	na	esf1 family
ETH_00015000	1	1.22	na	na	na	na	na	na	na	na	na	na	na	na	0.11	0.09	1.22	na	na	na	hypothetical protein
ETH_00009325	1	1.22	na	na	na	na	na	na	na	na	na	na	na	na	0.11	0.09	1.22	na	na	na	hypothetical protein
ETH_00019145	1	1.21	na	na	na	na	na	na	na	na	na	na	na	na	0.08	0.07	1.21	na	na	na	hypothetical protein
ETH_00028730	1	1.21	na	na	na	na	na	na	na	na	na	na	na	na	0.13	0.1	1.21	na	na	na	hypothetical protein
ETH_00002650	1	1.19	na	na	na	na	na	na	na	na	na	na	na	na	0.04	0.03	1.19	na	na	na	hypothetical protein
ETH_00014840	1	1.19	na	na	na	na	na	na	na	na	na	na	na	na	0.16	0.14	1.19	na	na	na	hypothetical protein
ETH_00001005	1	1.18	na	na	na	na	na	na	na	na	na	na	na	na	0.11	0.09	1.18	na	na	na	hypothetical protein
ETH_00007100	1	1.14	na	na	na	na	na	na	na	na	na	na	na	na	0.04	0.03	1.14	na	na	na	hypothetical protein
ETH_00014765	1	1.14	na	na	na	na	na	na	na	na	na	na	na	na	0.13	0.11	1.14	na	na	na	esf1 family
ETH_00028400	1	1.13	na	na	na	na	na	na	na	na	na	na	na	na	0.1	0.09	1.13	na	na	na	hypothetical protein
ETH_00039735	1	1.13	na	na	na	na	na	na	na	na	na	na	na	na	0.14	0.12	1.13	na	na	na	hypothetical protein
ETH_00033460	1	1.13	na	na	na	na	na	na	na	na	na	na	na	na	0.06	0.05	1.13	na	na	na	hypothetical protein
ETH_00015420	1	1.12	na	na	na	na	na	na	na	na	na	na	na	na	0.1	0.09	1.12	na	na	na	hypothetical protein
ETH_00033390	1	1.11	na	na	na	na	na	na	na	na	na	na	na	na	0.05	0.04	1.11	na	na	na	hypothetical protein
ETH_00031470	1	1.1	na	na	na	na	na	na	na	na	na	na	na	na	0.15	0.13	1.1	na	na	na	esf1 family
ETH_00021335	1	1.1	na	na	na	na	na	na	na	na	na	na	na	na	0.12	0.11	1.1	na	na	na	hypothetical protein
ETH_00027880	1	1.09	na	na	na	na	na	na	na	na	na	na	na	na	0.25	0.23	1.09	na	na	na	hypothetical protein
ETH_00004525	1	1.08	na	na	na	na	na	na	na	na	na	na	na	na	0.14	0.13	1.08	na	na	na	esf1 family
ETH_00014195	1	1.08	na	na	na	na	na	na	na	na	na	na	na	na	0.1	0.1	1.08	na	na	na	hypothetical protein
ETH_00040090	1	1.08	na	na	na	na	na	na	na	na	na	na	na	na	0.12	0.11	1.08	na	na	na	hypothetical protein
ETH_00025520	1	1.08	na	na	na	na	na	na	na	na	na	na	na	na	0.37	0.34	1.08	na	na	na	hypothetical protein
ETH_00032055	1	1.07	na	na	na	na	na	na	na	na	na	na	na	na	0.1	0.09	1.07	na	na	na	hypothetical protein
ETH_00028275	1	1.07	na	na	na	na	na	na	na	na	na	na	na	na	0.03	0.02	1.07	na	na	na	hypothetical protein
ETH_00027250	1	1.05	na	na	na	na	na	na	na	na	na	na	na	na	0.11	0.1	1.05	na	na	na	hypothetical protein
ETH_00013475	1	1.05	na	na	na	na	na	na	na	na	na	na	na	na	0.1	0.1	1.05	na	na	na	esf1 family
ETH_00000020	1	1.05	na	na	na	na	na	na	na	na	na	na	na	na	0.17	0.17	1.05	na	na	na	hypothetical protein
ETH_00026110	1	1.04	na	na	na	na	na	na	na	na	na	na	na	na	0.08	0.07	1.04	na	na	na	hypothetical protein
ETH_00010335	1	1.04	na	na	na	na	na	na	na	na	na	na	na	na	0.05	0.04	1.04	na	na	na	hypothetical protein
ETH_00039040	1	1.03	na	na	na	na	na	na	na	na	na	na	na	na	0.04	0.04	1.03	na	na	na	na
ETH_00011445	1	1.02	na	na	na	na	na	na	na	na	na	na	na	na	0.27	0.27	1.02	na	na	na	hypothetical protein
ETH_00031990	1	1.02	na	na	na	na	na	na	na	na	na	na	na	na	0.15	0.15	1.02	na	na	na	hypothetical protein
ETH_00016545	1	1.02	na	na	na	na	na	na	na	na	na	na	na	na	0.08	0.08	1.02	na	na	na	hypothetical protein
ETH_00014775	1	1.01	na	na	na	na	na	na	na	na	na	na	na	na	0.21	0.2	1.01	na	na	na	hypothetical protein
ETH_00019360	1	1	na	na	na	na	na	na	na	na	na	na	na	na	0.27	0.27	1	na	na	na	hypothetical protein
ETH_00004815	1	1	na	na	na	na	na	na	na	na	na	na	na	na	0.11	0.11	1	na	na	na	hypothetical protein
ETH_00016315	1	1	na	na	na	na	na	na	na	na	na	na	na	na	0.17	0.17	1	na	na	na	hypothetical protein
ETH_00004595	1	1	na	na	na	na	na	na	na	na	na	NaN	NaN	NaN	0.13	0.13	1	na	na	na	hypothetical protein
ETH_00027130	1	0.99	na	na	na	na	na	na	na	na	na	na	na	na	0.15	0.15	0.99	na	na	na	hypothetical protein
ETH_00007330	1	0.99	na	na	na	na	na	na	na	na	na	na	na	na	0.61	0.62	0.99	na	na	na	hypothetical protein
ETH_00028680	1	0.97	na	na	na	na	na	na	na	na	na	na	na	na	0.1	0.1	0.97	na	na	na	hypothetical protein
ETH_00003605	1	0.97	na	na	na	na	na	na	na	na	na	na	na	na	0.16	0.17	0.97	na	na	na	hypothetical protein
ETH_00006175	1	0.96	na	na	na	na	na	na	na	na	na	na	na	na	0.05	0.05	0.96	na	na	na	hypothetical protein
ETH_00016140	1	0.96	na	na	na	na	na	na	na	na	na	na	na	na	0.11	0.11	0.96	na	na	na	esf1 family
ETH_00038755	1	0.96	NaN	NaN	NaN	NaN	NaN	NaN	na	na	na	na	na	na	1.25	1.3	0.96	na	na	na	na
ETH_00014300	1	0.96	na	na	na	na	na	na	na	na	na	na	na	na	0.13	0.14	0.96	na	na	na	hypothetical protein
ETH_00022330	1	0.96	na	na	na	na	na	na	na	na	na	na	na	na	0.15	0.16	0.96	na	na	na	esf2 family
ETH_00007070	1	0.95	na	na	na	na	na	na	na	na	na	na	na	na	0.12	0.12	0.95	na	na	na	hypothetical protein
ETH_00028450	1	0.94	na	na	na	na	na	na	na	na	na	na	na	na	0.02	0.02	0.94	na	na	na	hypothetical protein
ETH_00007075	1	0.94	na	na	na	na	na	na	na	na	na	na	na	na	0.06	0.07	0.94	na	na	na	hypothetical protein
ETH_00034145	1	0.93	na	na	na	na	na	na	na	na	na	na	na	na	0.1	0.11	0.93	na	na	na	na
ETH_00016320	1	0.93	na	na	na	na	na	na	na	na	na	na	na	na	0.19	0.2	0.93	na	na	na	hypothetical protein
ETH_00028800	1	0.92	na	na	na	na	na	na	na	na	na	na	na	na	0.14	0.16	0.92	na	na	na	hypothetical protein
ETH_00038105	1	0.92	na	na	na	na	na	na	na	na	na	na	na	na	0.1	0.11	0.92	na	na	na	na
ETH_00028140	1	0.92	na	na	na	na	na	na	na	na	na	na	na	na	0.25	0.27	0.92	na	na	na	hypothetical protein
ETH_00034500	1	0.91	na	na	na	na	na	na	na	na	na	na	na	na	0.18	0.19	0.91	na	na	na	hypothetical protein
ETH_00033825	2	0.91	1.2	1.36	0.88	NaN	NaN	NaN	na	na	na	NaN	NaN	NaN	na	na	na	1.3	1.37	0.95	hypothetical protein, conserved
ETH_00007960	1	0.9	na	na	na	na	na	na	na	na	na	na	na	na	0.08	0.09	0.9	na	na	na	esf1 family
ETH_00027855	1	0.9	na	na	na	na	na	na	na	na	na	na	na	na	0.09	0.09	0.9	na	na	na	hypothetical protein
ETH_00032145	1	0.89	na	na	na	na	na	na	na	na	na	na	na	na	0.11	0.12	0.89	na	na	na	hypothetical protein
ETH_00029065	1	0.88	na	na	na	na	na	na	na	na	na	na	na	na	0.1	0.12	0.88	na	na	na	hypothetical protein
ETH_00022625	1	0.88	na	na	na	na	na	na	na	na	na	na	na	na	0.09	0.1	0.88	na	na	na	hypothetical protein
ETH_00036680	1	0.88	na	na	na	na	na	na	na	na	na	na	na	na	1.08	1.23	0.88	na	na	na	na
ETH_00029335	1	0.88	na	na	na	na	na	na	na	na	na	na	na	na	0.05	0.05	0.88	na	na	na	hypothetical protein
ETH_00023385	2	0.88	na	na	na	0.19	1.76	0.11	na	na	na	na	na	na	0.11	0.07	1.65	na	na	na	ATP synthase lipid-binding protein, putative
ETH_00022350	1	0.88	na	na	na	na	na	na	na	na	na	na	na	na	0.11	0.12	0.88	na	na	na	esf2 family
ETH_00007740	1	0.88	na	na	na	na	na	na	na	na	na	na	na	na	0.22	0.25	0.88	na	na	na	hypothetical protein
ETH_00004220	1	0.87	na	na	na	na	na	na	na	na	na	na	na	na	0.04	0.04	0.87	na	na	na	hypothetical protein
ETH_00029195	1	0.87	na	na	na	na	na	na	na	na	na	na	na	na	0.26	0.29	0.87	na	na	na	hypothetical protein
ETH_00039080	2	0.87	na	na	na	na	na	na	na	na	na	1.23	0.92	1.34	0.15	0.37	0.4	na	na	na	hypothetical protein
ETH_00018520	1	0.87	na	na	na	na	na	na	na	na	na	na	na	na	0.12	0.14	0.87	na	na	na	esf2 family
ETH_00014820	1	0.86	na	na	na	na	na	na	na	na	na	na	na	na	0.1	0.12	0.86	na	na	na	hypothetical protein
ETH_00020025	2	0.86	na	na	na	na	na	na	0.69	3.89	0.18	na	na	na	0.08	0.05	1.55	na	na	na	hypothetical protein
ETH_00025895	1	0.86	na	na	na	na	na	na	na	na	na	na	na	na	0.12	0.14	0.86	na	na	na	esf1 family
ETH_00014825	1	0.85	na	na	na	na	na	na	na	na	na	na	na	na	0.12	0.13	0.85	na	na	na	esf1 family
ETH_00018575	1	0.85	na	na	na	na	na	na	na	na	na	na	na	na	0.13	0.15	0.85	na	na	na	esf2 family
ETH_00001840	1	0.85	na	na	na	na	na	na	na	na	na	na	na	na	0.35	0.41	0.85	na	na	na	hypothetical protein
ETH_00011425	1	0.85	na	na	na	na	na	na	na	na	na	na	na	na	0.05	0.06	0.85	na	na	na	hypothetical protein
ETH_00030055	1	0.85	na	na	na	na	na	na	na	na	na	na	na	na	0.08	0.1	0.85	na	na	na	hypothetical protein
ETH_00034040	1	0.84	na	na	na	na	na	na	na	na	na	na	na	na	0.07	0.09	0.84	na	na	na	na
ETH_00015225	1	0.84	na	na	na	0.24	0.29	0.84	na	na	na	na	na	na	na	na	na	na	na	na	hypothetical protein
ETH_00025425	1	0.84	na	na	na	na	na	na	na	na	na	na	na	na	0.05	0.05	0.84	na	na	na	hypothetical protein
ETH_00043695	1	0.83	na	na	na	na	na	na	na	na	na	na	na	na	0.08	0.09	0.83	na	na	na	hypothetical protein
ETH_00029980	1	0.83	na	na	na	na	na	na	na	na	na	na	na	na	0.14	0.17	0.83	na	na	na	hypothetical protein
ETH_00003810	1	0.83	na	na	na	na	na	na	na	na	na	na	na	na	0.05	0.06	0.83	na	na	na	hypothetical protein
ETH_00030550	1	0.83	na	na	na	na	na	na	na	na	na	na	na	na	0.11	0.13	0.83	na	na	na	esf1 family
ETH_00000855	1	0.83	na	na	na	na	na	na	na	na	na	na	na	na	0.1	0.12	0.83	na	na	na	hypothetical protein
ETH_00017915	1	0.83	NaN	NaN	NaN	NaN	NaN	NaN	na	na	na	na	na	na	0.1	0.12	0.83	na	na	na	hypothetical protein
ETH_00003850	1	0.83	na	na	na	na	na	na	na	na	na	na	na	na	0.16	0.19	0.83	na	na	na	hypothetical protein
ETH_00022540	1	0.83	na	na	na	na	na	na	na	na	na	na	na	na	0.26	0.31	0.83	na	na	na	hypothetical protein
ETH_00015215	1	0.83	na	na	na	na	na	na	na	na	na	na	na	na	0.14	0.17	0.83	na	na	na	hypothetical protein
ETH_00036910	1	0.82	na	na	na	na	na	na	na	na	na	na	na	na	0.27	0.33	0.82	na	na	na	na
ETH_00019985	1	0.82	na	na	na	na	na	na	na	na	na	na	na	na	0.09	0.12	0.82	na	na	na	hypothetical protein
ETH_00012510	1	0.82	na	na	na	na	na	na	na	na	na	na	na	na	0.45	0.55	0.82	na	na	na	hypothetical protein
ETH_00041955	1	0.82	na	na	na	na	na	na	na	na	na	na	na	na	0.2	0.24	0.82	na	na	na	hypothetical protein
ETH_00016710	1	0.81	na	na	na	na	na	na	na	na	na	na	na	na	0.09	0.11	0.81	na	na	na	esf1 family
ETH_00029750	1	0.81	na	na	na	na	na	na	na	na	na	na	na	na	0.64	0.78	0.81	na	na	na	hypothetical protein
ETH_00004605	1	0.81	na	na	na	na	na	na	na	na	na	na	na	na	0.18	0.22	0.81	na	na	na	hypothetical protein
ETH_00014425	1	0.81	na	na	na	na	na	na	na	na	na	NaN	NaN	NaN	0.24	0.29	0.81	na	na	na	hypothetical protein, conserved
ETH_00021955	3	0.81	na	na	na	0.37	1.23	0.3	0.51	2.33	0.22	na	na	na	0.06	0.03	1.9	na	na	na	hypothetical protein
ETH_00025965	1	0.8	na	na	na	na	na	na	na	na	na	na	na	na	0.11	0.13	0.8	na	na	na	esf1 family
ETH_00006970	1	0.8	na	na	na	na	na	na	na	na	na	na	na	na	0.06	0.08	0.8	na	na	na	hypothetical protein
ETH_00041005	4	0.8	0.7	0.8	0.88	0.93	1.1	0.85	na	na	na	na	na	na	0.2	0.36	0.55	1.19	1.27	0.94	4-hydroxybenzoate octaprenyltransferase, putative
ETH_00001590	1	0.8	na	na	na	na	na	na	na	na	na	na	na	na	0.06	0.07	0.8	na	na	na	hypothetical protein
ETH_00002355	1	0.8	na	na	na	na	na	na	na	na	na	na	na	na	0.11	0.14	0.8	na	na	na	hypothetical protein
ETH_00021795	1	0.8	na	na	na	na	na	na	na	na	na	na	na	na	0.03	0.04	0.8	na	na	na	hypothetical protein
ETH_00031500	1	0.8	na	na	na	na	na	na	na	na	na	na	na	na	0.16	0.2	0.8	na	na	na	esf1 family
ETH_00012045	2	0.8	0.17	1	0.17	1.69	1.19	1.42	NaN	NaN	NaN	na	na	na	na	na	na	na	na	na	hypothetical protein
ETH_00029925	1	0.79	na	na	na	na	na	na	na	na	na	na	na	na	0.17	0.21	0.79	na	na	na	hypothetical protein
ETH_00000405	1	0.79	na	na	na	na	na	na	na	na	na	na	na	na	0.03	0.04	0.79	na	na	na	hypothetical protein
ETH_00000010	5	0.78	na	na	na	0.77	1.11	0.69	0.77	1.1	0.7	0.79	1.42	0.55	0.2	0.16	1.28	0.94	1.44	0.65	hypothetical protein
ETH_00004520	1	0.78	na	na	na	na	na	na	na	na	na	na	na	na	0.13	0.17	0.78	na	na	na	esf1 family
ETH_00003615	1	0.77	na	na	na	na	na	na	na	na	na	na	na	na	0.09	0.12	0.77	na	na	na	hypothetical protein
ETH_00000025	1	0.77	na	na	na	na	na	na	na	na	na	na	na	na	0.11	0.14	0.77	na	na	na	hypothetical protein
ETH_00029075	1	0.77	na	na	na	na	na	na	na	na	na	na	na	na	0.09	0.12	0.77	na	na	na	hypothetical protein
ETH_00025525	2	0.77	na	na	na	0.81	1.87	0.43	na	na	na	na	na	na	0.27	0.25	1.1	na	na	na	hypothetical protein
ETH_00043270	1	0.76	na	na	na	na	na	na	na	na	na	na	na	na	0.05	0.06	0.76	na	na	na	na
ETH_00008285	1	0.76	na	na	na	na	na	na	na	na	na	na	na	na	0.18	0.24	0.76	na	na	na	hypothetical protein
ETH_00003020	1	0.76	na	na	na	na	na	na	na	na	na	na	na	na	0.2	0.26	0.76	na	na	na	hypothetical protein
ETH_00023425	1	0.76	na	na	na	na	na	na	na	na	na	na	na	na	0.05	0.07	0.76	na	na	na	hypothetical protein
ETH_00001265	1	0.76	na	na	na	na	na	na	na	na	na	na	na	na	0.13	0.17	0.76	na	na	na	hypothetical protein
ETH_00007815	1	0.76	na	na	na	na	na	na	na	na	na	na	na	na	0.07	0.09	0.76	na	na	na	hypothetical protein
ETH_00041690	1	0.76	na	na	na	na	na	na	na	na	na	na	na	na	0.21	0.27	0.76	na	na	na	na
ETH_00003460	1	0.75	NaN	NaN	NaN	1.15	1.52	0.75	NaN	NaN	NaN	na	na	na	na	na	na	na	na	na	actin, putative
ETH_00015270	1	0.75	na	na	na	na	na	na	na	na	na	na	na	na	0.05	0.06	0.75	na	na	na	hypothetical protein
ETH_00012860	1	0.75	na	na	na	na	na	na	na	na	na	na	na	na	0.08	0.11	0.75	na	na	na	hypothetical protein
ETH_00015710	1	0.75	na	na	na	na	na	na	na	na	na	na	na	na	0.14	0.19	0.75	na	na	na	hypothetical protein
ETH_00021180	1	0.75	na	na	na	na	na	na	na	na	na	na	na	na	0.18	0.25	0.75	na	na	na	hypothetical protein
ETH_00004625	1	0.75	na	na	na	na	na	na	na	na	na	na	na	na	0.14	0.19	0.75	na	na	na	hypothetical protein
ETH_00013470	1	0.74	na	na	na	na	na	na	na	na	na	na	na	na	0.1	0.13	0.74	na	na	na	esf1 family
ETH_00000940	1	0.74	na	na	na	na	na	na	na	na	na	na	na	na	0.22	0.29	0.74	na	na	na	hypothetical protein
ETH_00015910	1	0.74	na	na	na	na	na	na	na	na	na	na	na	na	0.17	0.22	0.74	na	na	na	hypothetical protein
ETH_00003280	1	0.74	na	na	na	na	na	na	na	na	na	na	na	na	0.13	0.17	0.74	na	na	na	hypothetical protein
ETH_00027360	2	0.74	NaN	NaN	NaN	NaN	NaN	NaN	NaN	NaN	NaN	0.57	0.42	1.36	0.03	0.2	0.13	na	na	na	U2 small nuclear ribonucleoprotein auxiliary factor U2AF, putative
ETH_00039330	3	0.74	1.08	1.4	0.77	0.75	0.97	0.77	na	na	na	na	na	na	0.07	0.11	0.68	na	na	na	na
ETH_00011780	1	0.74	na	na	na	na	na	na	na	na	na	na	na	na	0.06	0.08	0.74	na	na	na	hypothetical protein
ETH_00022225	5	0.74	na	na	na	0.93	1.17	0.8	0.77	2.1	0.37	0.88	1.25	0.7	0.25	0.21	1.15	0.96	1.44	0.67	hypothetical protein
ETH_00020980	1	0.74	na	na	na	na	na	na	na	na	na	na	na	na	0.06	0.09	0.74	na	na	na	hypothetical protein
ETH_00016130	1	0.73	na	na	na	na	na	na	na	na	na	na	na	na	0.09	0.12	0.73	na	na	na	esf1 family
ETH_00021255	1	0.73	na	na	na	na	na	na	na	na	na	na	na	na	0.41	0.56	0.73	na	na	na	hypothetical protein
ETH_00012000	1	0.73	na	na	na	na	na	na	na	na	na	na	na	na	0.1	0.13	0.73	na	na	na	hypothetical protein
ETH_00030610	1	0.73	na	na	na	na	na	na	na	na	na	na	na	na	0.14	0.19	0.73	na	na	na	hypothetical protein
ETH_00000480	1	0.73	na	na	na	na	na	na	NaN	NaN	NaN	na	na	na	0.14	0.19	0.73	na	na	na	hypothetical protein
ETH_00012310	1	0.73	na	na	na	na	na	na	na	na	na	na	na	na	0.29	0.4	0.73	na	na	na	hypothetical protein
ETH_00014525	1	0.73	na	na	na	na	na	na	na	na	na	na	na	na	0.09	0.12	0.73	na	na	na	hypothetical protein
ETH_00017310	1	0.73	na	na	na	na	na	na	na	na	na	na	na	na	0.12	0.17	0.73	na	na	na	esf1 family
ETH_00009850	1	0.72	na	na	na	na	na	na	na	na	na	na	na	na	0.12	0.17	0.72	na	na	na	hypothetical protein
ETH_00033435	1	0.72	na	na	na	na	na	na	na	na	na	na	na	na	0.09	0.12	0.72	na	na	na	hypothetical protein
ETH_00019745	2	0.72	0.23	2.43	0.1	1.8	1.35	1.34	NaN	NaN	NaN	na	na	na	na	na	na	na	na	na	hypothetical protein, conserved
ETH_00027175	1	0.72	na	na	na	na	na	na	na	na	na	na	na	na	0.2	0.28	0.72	na	na	na	hypothetical protein
ETH_00013280	1	0.72	na	na	na	na	na	na	na	na	na	na	na	na	0.3	0.42	0.72	na	na	na	hypothetical protein
ETH_00031490	1	0.71	na	na	na	na	na	na	na	na	na	na	na	na	0.11	0.16	0.71	na	na	na	esf1 family
ETH_00042610	3	0.71	na	na	na	NaN	NaN	NaN	0.82	2.16	0.38	NaN	NaN	NaN	0.08	0.07	1.15	0.72	1.18	0.61	hypothetical protein
ETH_00021930	2	0.71	na	na	na	0.28	0.35	0.82	na	na	na	na	na	na	0.05	0.08	0.61	na	na	na	hypothetical protein
ETH_00009080	1	0.71	na	na	na	na	na	na	na	na	na	na	na	na	0.09	0.12	0.71	na	na	na	hypothetical protein
ETH_00029710	1	0.71	na	na	na	na	na	na	na	na	na	na	na	na	0.11	0.16	0.71	na	na	na	hypothetical protein
ETH_00028580	1	0.71	na	na	na	na	na	na	na	na	na	na	na	na	0.09	0.12	0.71	na	na	na	hypothetical protein
ETH_00003895	1	0.71	na	na	na	na	na	na	na	na	na	0.31	0.43	0.71	na	na	na	na	na	na	hypothetical protein
ETH_00003485	1	0.7	na	na	na	na	na	na	na	na	na	na	na	na	0.22	0.31	0.7	na	na	na	hypothetical protein
ETH_00008905	1	0.7	na	na	na	na	na	na	na	na	na	na	na	na	0.21	0.29	0.7	na	na	na	hypothetical protein
ETH_00014370	1	0.7	na	na	na	na	na	na	na	na	na	na	na	na	0.6	0.85	0.7	na	na	na	hypothetical protein
ETH_00032680	1	0.7	na	na	na	na	na	na	na	na	na	na	na	na	0.03	0.04	0.7	na	na	na	adaptor complexes medium subunit domain containing protein, putative
ETH_00033535	2	0.7	na	na	na	0.27	3.22	0.08	na	na	na	na	na	na	0.08	0.06	1.31	na	na	na	hypothetical protein
ETH_00018535	1	0.7	na	na	na	na	na	na	na	na	na	na	na	na	0.08	0.12	0.7	na	na	na	esf2 family
ETH_00018850	2	0.7	0.13	1.98	0.07	na	na	na	NaN	NaN	NaN	1.41	1.06	1.33	na	na	na	na	na	na	hypothetical protein, conserved
ETH_00005475	1	0.7	na	na	na	na	na	na	na	na	na	na	na	na	0.09	0.13	0.7	na	na	na	hypothetical protein
ETH_00031575	1	0.69	na	na	na	na	na	na	na	na	na	na	na	na	0.12	0.17	0.69	na	na	na	hypothetical protein
ETH_00016120	1	0.69	na	na	na	na	na	na	na	na	na	na	na	na	0.13	0.19	0.69	na	na	na	esf1 family
ETH_00027270	1	0.69	na	na	na	na	na	na	NaN	NaN	NaN	na	na	na	0.11	0.15	0.69	na	na	na	hypothetical protein
ETH_00040465	1	0.69	na	na	na	0.48	0.7	0.69	na	na	na	na	na	na	na	na	na	na	na	na	hypothetical protein
ETH_00010480	1	0.68	na	na	na	na	na	na	na	na	na	na	na	na	0.06	0.08	0.68	na	na	na	hypothetical protein
ETH_00011600	1	0.68	na	na	na	na	na	na	na	na	na	na	na	na	0.13	0.19	0.68	na	na	na	hypothetical protein
ETH_00017445	1	0.68	na	na	na	na	na	na	na	na	na	na	na	na	0.04	0.06	0.68	na	na	na	hypothetical protein
ETH_00035060	1	0.68	na	na	na	na	na	na	na	na	na	na	na	na	0.08	0.12	0.68	na	na	na	hypothetical protein
ETH_00020270	1	0.68	na	na	na	na	na	na	na	na	na	na	na	na	0.06	0.09	0.68	na	na	na	hypothetical protein
ETH_00025725	1	0.68	na	na	na	NaN	NaN	NaN	na	na	na	NaN	NaN	NaN	0.12	0.17	0.68	na	na	na	eukaryotic aspartyl protease, putative
ETH_00007145	1	0.68	na	na	na	na	na	na	na	na	na	na	na	na	0.1	0.14	0.68	na	na	na	hypothetical protein
ETH_00018540	2	0.68	na	na	na	0.75	2.72	0.28	na	na	na	na	na	na	0.09	0.09	1.09	na	na	na	esf2 family
ETH_00006225	1	0.68	na	na	na	na	na	na	NaN	NaN	NaN	NaN	NaN	NaN	0.46	0.68	0.68	NaN	NaN	NaN	hypothetical protein, conserved
ETH_00015265	2	0.68	na	na	na	0.64	1.8	0.35	na	na	na	NaN	NaN	NaN	0.05	0.05	1	na	na	na	hypothetical protein
ETH_00001000	1	0.68	na	na	na	na	na	na	na	na	na	na	na	na	0.1	0.15	0.68	na	na	na	hypothetical protein
ETH_00043330	1	0.67	na	na	na	na	na	na	na	na	na	na	na	na	0.08	0.12	0.67	na	na	na	hypothetical protein
ETH_00000965	1	0.67	na	na	na	na	na	na	na	na	na	na	na	na	0.17	0.25	0.67	na	na	na	hypothetical protein
ETH_00024935	1	0.67	na	na	na	na	na	na	na	na	na	na	na	na	0.15	0.22	0.67	na	na	na	hypothetical protein
ETH_00025925	1	0.67	na	na	na	na	na	na	na	na	na	na	na	na	0.07	0.11	0.67	na	na	na	hypothetical protein
ETH_00021160	1	0.67	na	na	na	na	na	na	na	na	na	na	na	na	0.08	0.12	0.67	na	na	na	hypothetical protein
ETH_00024380	1	0.67	na	na	na	na	na	na	na	na	na	na	na	na	0.07	0.11	0.67	na	na	na	hypothetical protein
ETH_00014770	1	0.67	na	na	na	na	na	na	na	na	na	na	na	na	0.09	0.14	0.67	na	na	na	esf1 family
ETH_00025440	1	0.66	NaN	NaN	NaN	1.05	1.57	0.66	NaN	NaN	NaN	na	na	na	na	na	na	na	na	na	hypothetical protein
ETH_00023305	1	0.66	na	na	na	na	na	na	na	na	na	na	na	na	0.04	0.06	0.66	na	na	na	hypothetical protein
ETH_00006885	1	0.66	na	na	na	na	na	na	na	na	na	na	na	na	0.06	0.1	0.66	na	na	na	hypothetical protein
ETH_00030845	1	0.66	na	na	na	na	na	na	na	na	na	na	na	na	0.08	0.12	0.66	na	na	na	hypothetical protein
ETH_00004710	2	0.66	na	na	na	na	na	na	na	na	na	NaN	NaN	NaN	0.18	0.19	0.94	0.86	2.33	0.37	hypothetical protein
ETH_00030305	1	0.66	na	na	na	na	na	na	na	na	na	na	na	na	0.08	0.11	0.66	na	na	na	DEAD/DEAH box helicase, putative
ETH_00001595	1	0.65	na	na	na	na	na	na	na	na	na	na	na	na	0.27	0.42	0.65	na	na	na	hypothetical protein
ETH_00022915	1	0.65	na	na	na	na	na	na	na	na	na	na	na	na	0.2	0.3	0.65	na	na	na	hypothetical protein
ETH_00026845	1	0.65	na	na	na	na	na	na	na	na	na	na	na	na	0.05	0.08	0.65	na	na	na	hypothetical protein
ETH_00005400	1	0.65	na	na	na	na	na	na	na	na	na	na	na	na	0.05	0.07	0.65	na	na	na	hypothetical protein
ETH_00034935	1	0.65	na	na	na	na	na	na	na	na	na	na	na	na	0.08	0.12	0.65	na	na	na	sag
ETH_00001510	1	0.65	na	na	na	na	na	na	na	na	na	na	na	na	0.07	0.12	0.65	na	na	na	hypothetical protein
ETH_00016080	2	0.65	NaN	NaN	NaN	NaN	NaN	NaN	NaN	NaN	NaN	na	na	na	0.21	0.68	0.32	1.35	1.39	0.97	hypothetical protein
ETH_00040765	1	0.65	na	na	na	na	na	na	na	na	na	0.36	0.56	0.65	na	na	na	na	na	na	na
ETH_00035215	1	0.64	na	na	na	na	na	na	na	na	na	na	na	na	0.2	0.31	0.64	na	na	na	hypothetical protein
ETH_00009920	1	0.64	na	na	na	na	na	na	na	na	na	na	na	na	0.07	0.12	0.64	na	na	na	hypothetical protein
ETH_00008040	1	0.64	na	na	na	na	na	na	na	na	na	na	na	na	0.15	0.23	0.64	na	na	na	hypothetical protein
ETH_00031230	1	0.64	na	na	na	na	na	na	na	na	na	na	na	na	0.11	0.17	0.64	na	na	na	hypothetical protein
ETH_00010745	1	0.64	na	na	na	na	na	na	na	na	na	na	na	na	0.12	0.19	0.64	na	na	na	sag
ETH_00013178	1	0.64	na	na	na	na	na	na	na	na	na	na	na	na	0.22	0.35	0.64	na	na	na	hypothetical protein, conserved
ETH_00034285	4	0.64	0.32	0.86	0.37	0.43	0.67	0.64	na	na	na	na	na	na	0.06	0.06	1.05	0.4	0.84	0.48	hypothetical protein
ETH_00000015	1	0.63	na	na	na	na	na	na	na	na	na	na	na	na	0.13	0.21	0.63	na	na	na	hypothetical protein
ETH_00038525	1	0.63	na	na	na	na	na	na	NaN	NaN	NaN	1.05	1.67	0.63	na	na	na	na	na	na	hypothetical protein
ETH_00039125	1	0.63	na	na	na	na	na	na	na	na	na	na	na	na	0.22	0.35	0.63	na	na	na	hypothetical protein
ETH_00024645	1	0.63	na	na	na	na	na	na	na	na	na	na	na	na	0.4	0.64	0.63	na	na	na	hypothetical protein, conserved
ETH_00031785	1	0.63	na	na	na	na	na	na	na	na	na	na	na	na	0.05	0.07	0.63	na	na	na	hypothetical protein
ETH_00013180	1	0.63	na	na	na	na	na	na	na	na	na	na	na	na	0.15	0.23	0.63	na	na	na	sag
ETH_00006275	1	0.63	na	na	na	na	na	na	na	na	na	na	na	na	0.53	0.85	0.63	na	na	na	hypothetical protein
ETH_00023535	1	0.63	na	na	na	na	na	na	na	na	na	na	na	na	0.02	0.03	0.63	na	na	na	hypothetical protein
ETH_00011950	1	0.63	na	na	na	na	na	na	na	na	na	na	na	na	0.07	0.11	0.63	na	na	na	hypothetical protein
ETH_00002375	1	0.63	na	na	na	na	na	na	na	na	na	na	na	na	0.03	0.05	0.63	na	na	na	hypothetical protein
ETH_00036290	2	0.62	0.43	1.94	0.22	na	na	na	na	na	na	na	na	na	0.02	0.02	1.03	NaN	NaN	NaN	hypothetical protein
ETH_00014085	1	0.62	na	na	na	na	na	na	na	na	na	na	na	na	0.17	0.27	0.62	na	na	na	UBX domain-containing protein, putative
ETH_00021840	1	0.62	na	na	na	na	na	na	na	na	na	na	na	na	0.15	0.25	0.62	na	na	na	hypothetical protein
ETH_00003380	1	0.62	na	na	na	na	na	na	na	na	na	na	na	na	0.26	0.42	0.62	na	na	na	hypothetical protein
ETH_00015300	1	0.62	na	na	na	na	na	na	na	na	na	na	na	na	0.05	0.07	0.62	na	na	na	hypothetical protein
ETH_00031595	1	0.62	na	na	na	na	na	na	na	na	na	na	na	na	0.06	0.1	0.62	na	na	na	hypothetical protein, conserved
ETH_00028725	1	0.62	NaN	NaN	NaN	na	na	na	na	na	na	na	na	na	0.33	0.54	0.62	na	na	na	hypothetical protein
ETH_00007490	1	0.62	na	na	na	na	na	na	na	na	na	na	na	na	0.13	0.21	0.62	na	na	na	hypothetical protein
ETH_00015310	1	0.62	na	na	na	na	na	na	na	na	na	na	na	na	0.06	0.1	0.62	na	na	na	hypothetical protein
ETH_00019255	1	0.62	na	na	na	na	na	na	na	na	na	na	na	na	0.02	0.04	0.62	na	na	na	hypothetical protein
ETH_00025130	1	0.62	na	na	na	na	na	na	na	na	na	na	na	na	0.06	0.09	0.62	na	na	na	hypothetical protein
ETH_00022300	1	0.62	na	na	na	na	na	na	na	na	na	na	na	na	0.23	0.38	0.62	na	na	na	hypothetical protein
ETH_00009360	1	0.62	na	na	na	na	na	na	na	na	na	na	na	na	0.05	0.09	0.62	na	na	na	hypothetical protein
ETH_00018815	1	0.61	na	na	na	na	na	na	na	na	na	na	na	na	0.22	0.36	0.61	na	na	na	hypothetical protein
ETH_00021940	1	0.61	na	na	na	na	na	na	na	na	na	na	na	na	0.11	0.18	0.61	na	na	na	hypothetical protein
ETH_00000060	1	0.61	na	na	na	na	na	na	na	na	na	na	na	na	0.03	0.05	0.61	na	na	na	hypothetical protein
ETH_00040415	2	0.61	na	na	na	na	na	na	na	na	na	0.71	1.27	0.56	0.22	0.33	0.66	na	na	na	na
ETH_00017630	3	0.61	0.66	1.15	0.58	1.02	1.23	0.83	NaN	NaN	NaN	na	na	na	0.21	0.5	0.43	NaN	NaN	NaN	hypothetical protein
ETH_00014355	1	0.61	na	na	na	na	na	na	na	na	na	na	na	na	0.13	0.22	0.61	na	na	na	hypothetical protein
ETH_00011455	1	0.61	NaN	NaN	NaN	na	na	na	NaN	NaN	NaN	na	na	na	0.66	1.08	0.61	na	na	na	mitochondrial carrier domain-containing protein, putative
ETH_00017195	1	0.61	na	na	na	na	na	na	na	na	na	na	na	na	0.05	0.08	0.61	na	na	na	hypothetical protein, conserved
ETH_00043375	4	0.61	NaN	NaN	NaN	0.41	0.58	0.71	0.44	1.32	0.33	NaN	NaN	NaN	0.1	0.1	0.98	0.56	1.38	0.4	hypothetical protein
ETH_00016505	1	0.61	na	na	na	NaN	NaN	NaN	na	na	na	na	na	na	0.04	0.06	0.61	na	na	na	hypothetical protein
ETH_00010935	1	0.6	na	na	na	na	na	na	na	na	na	na	na	na	0.38	0.63	0.6	na	na	na	hypothetical protein
ETH_00006220	1	0.6	na	na	na	na	na	na	na	na	na	na	na	na	0.24	0.39	0.6	na	na	na	hypothetical protein
ETH_00005955	1	0.6	na	na	na	na	na	na	na	na	na	na	na	na	0.06	0.1	0.6	na	na	na	hypothetical protein
ETH_00032095	1	0.6	na	na	na	na	na	na	na	na	na	na	na	na	0.16	0.26	0.6	na	na	na	hypothetical protein
ETH_00001090	1	0.6	na	na	na	na	na	na	na	na	na	na	na	na	0.11	0.18	0.6	na	na	na	esf1 family
ETH_00005355	1	0.6	na	na	na	na	na	na	na	na	na	na	na	na	0.07	0.11	0.6	na	na	na	hypothetical protein
ETH_00023625	1	0.59	na	na	na	na	na	na	na	na	na	na	na	na	0.23	0.39	0.59	na	na	na	hypothetical protein
ETH_00012990	1	0.59	na	na	na	na	na	na	na	na	na	na	na	na	0.12	0.21	0.59	na	na	na	hypothetical protein
ETH_00026825	1	0.59	na	na	na	na	na	na	na	na	na	na	na	na	0.13	0.21	0.59	na	na	na	hypothetical protein
ETH_00013270	1	0.59	na	na	na	na	na	na	na	na	na	na	na	na	0.28	0.47	0.59	na	na	na	hypothetical protein
ETH_00021175	1	0.59	na	na	na	na	na	na	na	na	na	na	na	na	0.09	0.15	0.59	na	na	na	esf6 family
ETH_00028075	1	0.59	na	na	na	na	na	na	na	na	na	na	na	na	0.07	0.12	0.59	na	na	na	hypothetical protein
ETH_00027145	1	0.59	na	na	na	na	na	na	na	na	na	na	na	na	0.12	0.2	0.59	na	na	na	hypothetical protein, conserved
ETH_00033490	4	0.59	0.53	1.56	0.34	0.54	1.63	0.33	na	na	na	1.03	0.8	1.28	0.08	0.21	0.39	NaN	NaN	NaN	hypothetical protein
ETH_00026210	1	0.59	na	na	na	na	na	na	na	na	na	na	na	na	0.04	0.07	0.59	na	na	na	hypothetical protein
ETH_00021170	3	0.59	na	na	na	1.2	2.58	0.47	0.63	4.24	0.15	na	na	na	0.12	0.1	1.15	na	na	na	esf6 family
ETH_00040905	1	0.59	na	na	na	na	na	na	na	na	na	na	na	na	0.04	0.07	0.59	na	na	na	hypothetical protein
ETH_00027695	2	0.59	0.69	3.11	0.22	na	na	na	na	na	na	na	na	na	0.1	0.11	0.95	na	na	na	hypothetical protein
ETH_00014025	1	0.59	na	na	na	na	na	na	na	na	na	na	na	na	0.11	0.19	0.59	na	na	na	hypothetical protein
ETH_00006165	1	0.58	na	na	na	na	na	na	na	na	na	na	na	na	0.19	0.33	0.58	na	na	na	hypothetical protein
ETH_00019205	2	0.58	0.63	1.83	0.34	na	na	na	na	na	na	na	na	na	0.1	0.12	0.82	na	na	na	hypothetical protein
ETH_00010790	1	0.58	na	na	na	na	na	na	na	na	na	na	na	na	0.07	0.12	0.58	na	na	na	sag
ETH_00019525	1	0.58	na	na	na	na	na	na	na	na	na	na	na	na	0.44	0.76	0.58	na	na	na	hypothetical protein
ETH_00029340	1	0.58	na	na	na	na	na	na	na	na	na	na	na	na	0.07	0.12	0.58	na	na	na	hypothetical protein
ETH_00018905	1	0.58	na	na	na	na	na	na	na	na	na	na	na	na	0.07	0.11	0.58	na	na	na	hypothetical protein
ETH_00021875	6	0.58	0.25	1.43	0.17	0.33	0.9	0.37	1.12	1.74	0.65	0.63	0.39	1.62	0.1	0.24	0.41	0.43	1.72	0.25	hypothetical protein
ETH_00018300	1	0.58	na	na	na	na	na	na	na	na	na	na	na	na	0.06	0.1	0.58	na	na	na	esf1 family
ETH_00010840	1	0.58	na	na	na	na	na	na	na	na	na	na	na	na	0.14	0.24	0.58	na	na	na	sag
ETH_00007495	1	0.58	na	na	na	na	na	na	na	na	na	na	na	na	0.12	0.2	0.58	na	na	na	hypothetical protein
ETH_00015365	1	0.57	na	na	na	na	na	na	na	na	na	na	na	na	0.04	0.07	0.57	na	na	na	hypothetical protein
ETH_00011910	1	0.57	na	na	na	NaN	NaN	NaN	na	na	na	na	na	na	0.06	0.11	0.57	na	na	na	hypothetical protein, conserved
ETH_00010455	1	0.57	na	na	na	na	na	na	na	na	na	na	na	na	0.08	0.14	0.57	na	na	na	hypothetical protein
ETH_00042395	1	0.57	na	na	na	na	na	na	na	na	na	na	na	na	0.07	0.12	0.57	na	na	na	hypothetical protein
ETH_00009405	2	0.57	na	na	na	na	na	na	na	na	na	1.03	2.21	0.47	0.04	0.06	0.67	na	na	na	hypothetical protein
ETH_00011575	2	0.57	na	na	na	na	na	na	na	na	na	NaN	NaN	NaN	0.08	0.1	0.8	0.78	2.3	0.34	hypothetical protein
ETH_00004835	1	0.57	na	na	na	na	na	na	na	na	na	na	na	na	0.05	0.09	0.57	na	na	na	hypothetical protein
ETH_00011040	1	0.57	NaN	NaN	NaN	NaN	NaN	NaN	na	na	na	NaN	NaN	NaN	0.04	0.07	0.57	NaN	NaN	NaN	hypothetical protein, conserved
ETH_00016310	3	0.57	na	na	na	0.81	2.03	0.4	0.88	2.11	0.42	na	na	na	0.15	0.16	0.88	na	na	na	hypothetical protein
ETH_00026790	1	0.56	na	na	na	na	na	na	na	na	na	na	na	na	0.09	0.16	0.56	na	na	na	hypothetical protein
ETH_00008950	1	0.56	na	na	na	na	na	na	na	na	na	na	na	na	0.08	0.15	0.56	na	na	na	hypothetical protein
ETH_00005920	1	0.56	na	na	na	na	na	na	na	na	na	na	na	na	0.2	0.35	0.56	na	na	na	hypothetical protein
ETH_00014035	1	0.56	na	na	na	na	na	na	na	na	na	na	na	na	0.04	0.07	0.56	na	na	na	hypothetical protein
ETH_00041860	4	0.56	0.83	1.61	0.52	0.9	1.54	0.58	0.92	1.22	0.75	NaN	NaN	NaN	na	na	na	0.81	2.06	0.39	hypothetical protein
ETH_00013800	4	0.56	na	na	na	0.82	2.71	0.3	0.94	1.92	0.49	na	na	na	0.11	0.1	1.06	0.84	2.13	0.4	hypothetical protein
ETH_00013550	1	0.56	na	na	na	na	na	na	na	na	na	na	na	na	0.13	0.23	0.56	na	na	na	hypothetical protein
ETH_00010975	1	0.56	na	na	na	na	na	na	na	na	na	na	na	na	0.07	0.12	0.56	na	na	na	hypothetical protein
ETH_00004630	1	0.56	na	na	na	na	na	na	na	na	na	na	na	na	0.15	0.26	0.56	na	na	na	hypothetical protein
ETH_00014320	1	0.56	NaN	NaN	NaN	NaN	NaN	NaN	NaN	NaN	NaN	na	na	na	0.09	0.15	0.56	na	na	na	hypothetical protein, conserved
ETH_00011270	1	0.56	na	na	na	na	na	na	na	na	na	na	na	na	0.07	0.12	0.56	na	na	na	hypothetical protein
ETH_00011820	1	0.56	na	na	na	na	na	na	na	na	na	na	na	na	0.13	0.23	0.56	na	na	na	hypothetical protein
ETH_00031345	3	0.56	na	na	na	na	na	na	0.82	3.53	0.23	na	na	na	0.15	0.15	0.98	0.78	1.72	0.46	esf1 family
ETH_00025850	1	0.56	na	na	na	na	na	na	na	na	na	na	na	na	0.16	0.28	0.56	na	na	na	hypothetical protein
ETH_00036470	1	0.56	na	na	na	na	na	na	na	na	na	na	na	na	0.13	0.24	0.56	na	na	na	hypothetical protein
ETH_00040865	3	0.56	0.72	1.05	0.69	0.86	1.37	0.63	na	na	na	1.12	3.2	0.35	na	na	na	na	na	na	hypothetical protein
ETH_00039500	1	0.56	na	na	na	na	na	na	na	na	na	na	na	na	0.04	0.08	0.56	na	na	na	hypothetical protein
ETH_00001085	1	0.55	na	na	na	na	na	na	na	na	na	na	na	na	0.08	0.14	0.55	na	na	na	esf1 family
ETH_00000600	4	0.55	na	na	na	0.71	1.25	0.57	0.44	1.48	0.3	0.77	1.84	0.42	0.23	0.25	0.93	NaN	NaN	NaN	hypothetical protein
ETH_00019180	1	0.55	na	na	na	na	na	na	na	na	na	na	na	na	0.04	0.08	0.55	na	na	na	hypothetical protein
ETH_00007680	1	0.55	na	na	na	na	na	na	na	na	na	na	na	na	0.07	0.12	0.55	na	na	na	hypothetical protein
ETH_00017850	1	0.55	na	na	na	na	na	na	na	na	na	na	na	na	0.08	0.14	0.55	na	na	na	hypothetical protein
ETH_00005980	1	0.55	na	na	na	na	na	na	na	na	na	na	na	na	0.2	0.37	0.55	na	na	na	hypothetical protein
ETH_00008295	1	0.55	na	na	na	na	na	na	na	na	na	na	na	na	0.26	0.47	0.55	NaN	NaN	NaN	U2 small nuclear ribonucleoprotein, putative
ETH_00025900	3	0.55	na	na	na	0.73	1.7	0.43	0.76	1.59	0.48	na	na	na	0.1	0.13	0.74	na	na	na	esf1 family
ETH_00012850	1	0.55	na	na	na	na	na	na	na	na	na	na	na	na	0.25	0.45	0.55	na	na	na	hypothetical protein
ETH_00035225	1	0.55	na	na	na	na	na	na	na	na	na	0.84	1.52	0.55	na	na	na	na	na	na	hypothetical protein
ETH_00024115	1	0.55	na	na	na	na	na	na	na	na	na	na	na	na	0.05	0.09	0.55	na	na	na	hypothetical protein
ETH_00028910	1	0.55	na	na	na	na	na	na	na	na	na	na	na	na	0.06	0.11	0.55	na	na	na	hypothetical protein
ETH_00029855	1	0.55	na	na	na	na	na	na	na	na	na	na	na	na	0.1	0.19	0.55	na	na	na	hypothetical protein
ETH_00025430	4	0.55	NaN	NaN	NaN	0.95	2.08	0.45	NaN	NaN	NaN	1.18	1.25	0.94	0.08	0.22	0.37	0.92	2.18	0.42	TPR domain-containing protein, putative
ETH_00025275	1	0.55	na	na	na	na	na	na	na	na	na	na	na	na	0.06	0.11	0.55	na	na	na	hypothetical protein
ETH_00016145	5	0.55	0.68	1.36	0.5	0.72	1.61	0.45	0.72	1.76	0.41	na	na	na	0.13	0.13	0.96	0.63	1.53	0.41	esf1 family
ETH_00039585	1	0.54	na	na	na	na	na	na	na	na	na	na	na	na	0.16	0.29	0.54	na	na	na	hypothetical protein
ETH_00005665	1	0.54	na	na	na	na	na	na	na	na	na	na	na	na	0.07	0.13	0.54	na	na	na	hypothetical protein
ETH_00023340	1	0.54	na	na	na	na	na	na	na	na	na	na	na	na	0.03	0.05	0.54	na	na	na	hypothetical protein
ETH_00032880	1	0.54	na	na	na	na	na	na	na	na	na	na	na	na	0.1	0.19	0.54	na	na	na	hypothetical protein
ETH_00018315	1	0.54	na	na	na	na	na	na	na	na	na	na	na	na	0.09	0.16	0.54	na	na	na	esf1 family
ETH_00022035	1	0.54	na	na	na	na	na	na	na	na	na	na	na	na	0.05	0.1	0.54	na	na	na	NEK kinase, putative
ETH_00003955	1	0.54	na	na	na	na	na	na	na	na	na	NaN	NaN	NaN	0.07	0.13	0.54	na	na	na	hypothetical protein
ETH_00014350	1	0.54	na	na	na	na	na	na	na	na	na	na	na	na	0.23	0.42	0.54	na	na	na	hypothetical protein
ETH_00003595	1	0.54	na	na	na	na	na	na	na	na	na	na	na	na	0.09	0.17	0.54	na	na	na	hypothetical protein
ETH_00013215	1	0.54	na	na	na	na	na	na	na	na	na	na	na	na	0.1	0.18	0.54	na	na	na	hypothetical protein
ETH_00008160	4	0.54	0.65	1.39	0.47	0.34	1.06	0.32	NaN	NaN	NaN	1.46	1.58	0.92	0.08	0.19	0.44	na	na	na	hypothetical protein
ETH_00005050	1	0.54	NaN	NaN	NaN	na	na	na	na	na	na	na	na	na	0.24	0.45	0.54	na	na	na	hypothetical protein
ETH_00041065	1	0.54	na	na	na	na	na	na	na	na	na	na	na	na	0.11	0.2	0.54	na	na	na	hypothetical protein
ETH_00032215	3	0.54	0.46	1.06	0.44	na	na	na	na	na	na	0.54	1.3	0.41	0.04	0.06	0.76	na	na	na	hypothetical protein
ETH_00037280	5	0.54	na	na	na	0.71	0.88	0.81	0.85	4.54	0.19	0.76	2	0.38	0.28	0.4	0.7	0.79	1.31	0.6	hypothetical protein
ETH_00002845	1	0.53	na	na	na	na	na	na	na	na	na	na	na	na	0.06	0.11	0.53	na	na	na	hypothetical protein
ETH_00013805	4	0.53	na	na	na	0.9	2.17	0.41	0.87	1.93	0.45	na	na	na	0.09	0.11	0.85	0.84	2.01	0.42	hypothetical protein
ETH_00028805	1	0.53	na	na	na	na	na	na	na	na	na	na	na	na	0.04	0.07	0.53	na	na	na	hypothetical protein
ETH_00005680	1	0.53	na	na	na	na	na	na	na	na	na	na	na	na	0.11	0.2	0.53	na	na	na	hypothetical protein
ETH_00003160	1	0.53	na	na	na	na	na	na	na	na	na	na	na	na	0.04	0.08	0.53	na	na	na	hypothetical protein
ETH_00035920	1	0.53	na	na	na	na	na	na	na	na	na	na	na	na	0.25	0.47	0.53	na	na	na	hypothetical protein
ETH_00040340	5	0.53	0.94	0.82	1.14	0.33	1.35	0.24	0.33	1.84	0.18	0.71	1.05	0.68	na	na	na	0.63	1.56	0.4	hypothetical protein
ETH_00019345	1	0.53	na	na	na	na	na	na	na	na	na	na	na	na	0.04	0.07	0.53	na	na	na	hypothetical protein
ETH_00000950	2	0.53	NaN	NaN	NaN	0.87	1.45	0.6	na	na	na	na	na	na	na	na	na	0.95	2.07	0.46	hypothetical protein
ETH_00006505	1	0.53	na	na	na	na	na	na	na	na	na	na	na	na	0.2	0.37	0.53	na	na	na	hypothetical protein, conserved
ETH_00014295	5	0.53	0.72	1.46	0.49	0.75	1.7	0.44	0.82	2.24	0.36	na	na	na	0.13	0.13	0.96	0.75	1.97	0.38	hypothetical protein
ETH_00041255	2	0.53	0.71	1.86	0.38	NaN	NaN	NaN	na	na	na	na	na	na	na	na	na	0.81	1.2	0.68	hypothetical protein
ETH_00002185	1	0.53	NaN	NaN	NaN	na	na	na	NaN	NaN	NaN	NaN	NaN	NaN	0.12	0.23	0.53	na	na	na	PHD-finger domain-containing protein, putative
ETH_00006525	4	0.53	NaN	NaN	NaN	0.51	1.78	0.28	0.94	1.34	0.7	NaN	NaN	NaN	0.19	0.53	0.36	1.18	1.55	0.76	pescadillo family protein, putative
ETH_00003110	1	0.53	na	na	na	na	na	na	na	na	na	na	na	na	0.03	0.07	0.53	na	na	na	hypothetical protein
ETH_00036710	1	0.53	na	na	na	na	na	na	na	na	na	na	na	na	0.14	0.27	0.53	na	na	na	hypothetical protein
ETH_00025740	1	0.53	na	na	na	na	na	na	na	na	na	na	na	na	0.37	0.7	0.53	na	na	na	hypothetical protein
ETH_00028495	1	0.53	na	na	na	na	na	na	na	na	na	NaN	NaN	NaN	0.13	0.25	0.53	NaN	NaN	NaN	hypothetical protein
ETH_00007905	1	0.52	na	na	na	na	na	na	na	na	na	na	na	na	0.05	0.1	0.52	na	na	na	hypothetical protein
ETH_00002850	1	0.52	na	na	na	na	na	na	na	na	na	na	na	na	0.06	0.11	0.52	na	na	na	hypothetical protein
ETH_00037975	6	0.52	0.68	1.79	0.38	0.68	1.44	0.47	0.55	1.27	0.43	0.81	2.41	0.34	0.08	0.07	1.08	0.96	2.19	0.44	na
ETH_00012795	1	0.52	na	na	na	na	na	na	na	na	na	na	na	na	0.06	0.11	0.52	na	na	na	hypothetical protein
ETH_00026015	1	0.52	na	na	na	na	na	na	na	na	na	na	na	na	0.23	0.43	0.52	na	na	na	hypothetical protein
ETH_00001850	1	0.52	na	na	na	na	na	na	na	na	na	na	na	na	0.11	0.21	0.52	na	na	na	hypothetical protein
ETH_00030570	1	0.52	na	na	na	na	na	na	na	na	na	na	na	na	0.07	0.13	0.52	na	na	na	hypothetical protein
ETH_00006170	1	0.52	na	na	na	na	na	na	na	na	na	na	na	na	0.06	0.12	0.52	na	na	na	hypothetical protein
ETH_00022505	2	0.52	na	na	na	0.8	1.56	0.52	na	na	na	na	na	na	0.3	0.57	0.53	na	na	na	hypothetical protein
ETH_00010380	1	0.52	na	na	na	na	na	na	na	na	na	na	na	na	0.08	0.16	0.52	na	na	na	hypothetical protein
ETH_00026530	3	0.52	0.92	1.86	0.49	NaN	NaN	NaN	0.83	2.33	0.35	NaN	NaN	NaN	0.07	0.1	0.71	na	na	na	Proteophosphoglycan ppg4, related
ETH_00003320	1	0.52	na	na	na	na	na	na	na	na	na	na	na	na	0.07	0.13	0.52	na	na	na	hypothetical protein
ETH_00006710	1	0.52	na	na	na	na	na	na	na	na	na	na	na	na	0.1	0.2	0.52	na	na	na	hypothetical protein
ETH_00012060	1	0.52	na	na	na	na	na	na	na	na	na	na	na	na	0.07	0.13	0.52	na	na	na	hypothetical protein
ETH_00033240	2	0.52	na	na	na	0.47	1.43	0.33	na	na	na	na	na	na	0.03	0.05	0.71	NaN	NaN	NaN	hypothetical protein
ETH_00000305	1	0.52	na	na	na	na	na	na	na	na	na	na	na	na	0.21	0.41	0.52	na	na	na	hypothetical protein
ETH_00030335	1	0.51	na	na	na	na	na	na	na	na	na	na	na	na	0.18	0.36	0.51	na	na	na	hypothetical protein
ETH_00005440	6	0.51	0.44	1.16	0.38	0.63	1.19	0.53	0.65	1.26	0.52	0.71	3.18	0.22	0.12	0.12	0.96	0.75	1.57	0.48	hypothetical protein
ETH_00002075	1	0.51	na	na	na	na	na	na	na	na	na	na	na	na	0.09	0.17	0.51	na	na	na	hypothetical protein
ETH_00003165	2	0.51	NaN	NaN	NaN	na	na	na	na	na	na	0.48	2.05	0.23	0.08	0.1	0.79	na	na	na	DNA repair helicase, putative
ETH_00015330	1	0.51	na	na	na	na	na	na	na	na	na	na	na	na	0.15	0.3	0.51	na	na	na	hypothetical protein
ETH_00012730	4	0.51	na	na	na	0.79	1.75	0.45	0.81	2.93	0.28	na	na	na	0.1	0.11	0.91	0.83	2.03	0.41	hypothetical protein
ETH_00008090	1	0.51	na	na	na	na	na	na	na	na	na	na	na	na	0.34	0.67	0.51	na	na	na	hypothetical protein
ETH_00038205	1	0.51	na	na	na	na	na	na	na	na	na	na	na	na	0.08	0.15	0.51	na	na	na	hypothetical protein
ETH_00010635	1	0.51	na	na	na	na	na	na	na	na	na	na	na	na	0.09	0.17	0.51	na	na	na	hypothetical protein
ETH_00029090	1	0.51	na	na	na	na	na	na	na	na	na	na	na	na	0.06	0.12	0.51	na	na	na	hypothetical protein
ETH_00020735	1	0.51	na	na	na	na	na	na	na	na	na	na	na	na	0.05	0.11	0.51	na	na	na	hypothetical protein
ETH_00000820	1	0.51	na	na	na	na	na	na	na	na	na	na	na	na	0.09	0.17	0.51	na	na	na	hypothetical protein
ETH_00035130	1	0.51	na	na	na	na	na	na	na	na	na	na	na	na	0.04	0.08	0.51	na	na	na	hypothetical protein
ETH_00041780	1	0.51	na	na	na	na	na	na	na	na	na	na	na	na	na	na	na	0.93	1.82	0.51	hypothetical protein
ETH_00030600	1	0.51	na	na	na	na	na	na	na	na	na	na	na	na	0.06	0.12	0.51	na	na	na	hypothetical protein
ETH_00040970	1	0.51	na	na	na	na	na	na	na	na	na	na	na	na	0.08	0.15	0.51	na	na	na	hypothetical protein
ETH_00024090	2	0.51	na	na	na	na	na	na	na	na	na	0.28	0.77	0.36	0.04	0.06	0.66	na	na	na	hypothetical protein
ETH_00010785	1	0.51	na	na	na	na	na	na	na	na	na	na	na	na	0.07	0.13	0.51	na	na	na	sag
ETH_00011980	1	0.51	na	na	na	na	na	na	na	na	na	na	na	na	0.24	0.48	0.51	na	na	na	hypothetical protein
ETH_00013365	1	0.51	na	na	na	na	na	na	na	na	na	na	na	na	0.09	0.18	0.51	na	na	na	hypothetical protein
ETH_00031895	1	0.51	na	na	na	na	na	na	NaN	NaN	NaN	na	na	na	0.17	0.34	0.51	NaN	NaN	NaN	hypothetical protein
ETH_00001685	1	0.51	na	na	na	na	na	na	na	na	na	na	na	na	0.07	0.14	0.51	na	na	na	hypothetical protein
ETH_00007465	1	0.51	na	na	na	na	na	na	na	na	na	na	na	na	0.04	0.08	0.51	na	na	na	hypothetical protein
ETH_00023660	5	0.51	0.65	1.78	0.37	0.64	1.73	0.37	NaN	NaN	NaN	0.83	1.18	0.7	0.33	0.38	0.87	0.66	2.99	0.22	hypothetical protein
ETH_00006010	1	0.51	na	na	na	na	na	na	na	na	na	na	na	na	0.21	0.41	0.51	na	na	na	hypothetical protein
ETH_00034570	1	0.5	na	na	na	na	na	na	na	na	na	na	na	na	0.07	0.15	0.5	na	na	na	hypothetical protein
ETH_00037960	4	0.5	0.43	3.15	0.14	0.41	1.12	0.36	1.14	1.23	0.93	na	na	na	0.93	1.59	0.59	na	na	na	hypothetical protein
ETH_00028365	1	0.5	NaN	NaN	NaN	na	na	na	na	na	na	na	na	na	0.05	0.09	0.5	na	na	na	hypothetical protein
ETH_00018525	1	0.5	na	na	na	na	na	na	na	na	na	na	na	na	0.1	0.2	0.5	na	na	na	esf2 family
ETH_00014145	1	0.5	na	na	na	na	na	na	na	na	na	na	na	na	0.11	0.22	0.5	na	na	na	hypothetical protein
ETH_00028625	5	0.5	1.07	1.74	0.61	0.72	1.81	0.4	0.91	0.97	0.94	0.53	1.48	0.36	0.03	0.16	0.19	na	na	na	hypothetical protein
ETH_00003300	1	0.5	na	na	na	na	na	na	na	na	na	na	na	na	0.07	0.13	0.5	na	na	na	hypothetical protein
ETH_00015305	1	0.5	NaN	NaN	NaN	na	na	na	NaN	NaN	NaN	NaN	NaN	NaN	0.05	0.1	0.5	na	na	na	hypothetical protein
ETH_00027510	2	0.5	na	na	na	na	na	na	na	na	na	1.03	1.46	0.71	na	na	na	0.34	1.16	0.29	hypothetical protein
ETH_00026365	3	0.5	na	na	na	0.79	0.96	0.82	na	na	na	1.05	2.23	0.47	0.03	0.15	0.2	NaN	NaN	NaN	hypothetical protein, conserved
ETH_00028065	4	0.5	0.25	1.77	0.14	1.25	1.43	0.88	1.16	1.6	0.72	na	na	na	0.01	0.03	0.24	NaN	NaN	NaN	hypothetical protein, conserved
ETH_00012905	1	0.5	na	na	na	na	na	na	na	na	na	na	na	na	0.07	0.13	0.5	na	na	na	hypothetical protein
ETH_00040860	5	0.5	0.69	1.77	0.39	0.6	1.43	0.42	NaN	NaN	NaN	0.82	1.38	0.59	0.17	0.26	0.66	0.78	1.89	0.41	hypothetical protein
ETH_00008120	1	0.49	na	na	na	na	na	na	na	na	na	na	na	na	0.1	0.2	0.49	na	na	na	hypothetical protein
ETH_00010220	1	0.49	na	na	na	na	na	na	na	na	na	na	na	na	0.18	0.36	0.49	na	na	na	hypothetical protein
ETH_00007600	1	0.49	na	na	na	na	na	na	na	na	na	na	na	na	0.12	0.24	0.49	na	na	na	hypothetical protein
ETH_00007625	3	0.49	na	na	na	na	na	na	0.95	1.77	0.54	na	na	na	0.25	0.31	0.8	0.39	2.89	0.14	hypothetical protein
ETH_00017860	1	0.49	na	na	na	na	na	na	na	na	na	na	na	na	0.12	0.24	0.49	na	na	na	hypothetical protein
ETH_00035575	4	0.49	0.43	1.07	0.4	0.33	0.65	0.51	NaN	NaN	NaN	0.29	0.73	0.4	0.36	0.54	0.66	NaN	NaN	NaN	hypothetical protein
ETH_00006895	2	0.49	0.69	1.56	0.44	na	na	na	na	na	na	na	na	na	0.05	0.08	0.54	na	na	na	hypothetical protein
ETH_00023735	1	0.49	na	na	na	na	na	na	na	na	na	na	na	na	0.04	0.08	0.49	na	na	na	hypothetical protein, conserved
ETH_00037195	5	0.49	0.3	0.93	0.33	0.3	1.08	0.28	0.6	1.67	0.36	NaN	NaN	NaN	0.07	0.08	0.96	0.41	0.76	0.54	hypothetical protein
ETH_00043665	6	0.49	0.51	1.23	0.42	0.48	1.52	0.32	0.95	1.48	0.64	0.91	1.25	0.72	0.03	0.09	0.37	0.98	2.06	0.48	hypothetical protein
ETH_00016030	1	0.49	NaN	NaN	NaN	na	na	na	na	na	na	na	na	na	0.13	0.26	0.49	na	na	na	hypothetical protein
ETH_00027455	1	0.49	na	na	na	na	na	na	na	na	na	na	na	na	0.06	0.13	0.49	na	na	na	hypothetical protein
ETH_00015925	5	0.49	na	na	na	0.86	1.71	0.5	0.69	1.47	0.47	0.92	2.31	0.4	0.05	0.07	0.71	0.61	1.59	0.38	hypothetical protein
ETH_00032920	1	0.49	na	na	na	na	na	na	na	na	na	na	na	na	0.12	0.24	0.49	na	na	na	hypothetical protein, conserved
ETH_00038375	6	0.49	0.54	1.23	0.44	0.56	0.99	0.57	0.52	1.2	0.43	0.91	1.54	0.59	0.09	0.18	0.5	0.83	2.05	0.4	na
ETH_00031395	2	0.49	0.01	3.43	0	na	na	na	NaN	NaN	NaN	na	na	na	0.33	0.34	0.98	na	na	na	hypothetical protein
ETH_00034115	4	0.49	0.31	1.02	0.3	1.01	2.8	0.36	0.45	0.76	0.59	0.77	1.08	0.71	na	na	na	na	na	na	na
ETH_00006905	1	0.49	na	na	na	na	na	na	na	na	na	na	na	na	0.05	0.1	0.49	na	na	na	hypothetical protein
ETH_00005655	2	0.49	0.32	1.08	0.3	na	na	na	na	na	na	na	na	na	0.04	0.06	0.68	na	na	na	hypothetical protein
ETH_00008745	1	0.49	na	na	na	na	na	na	na	na	na	na	na	na	0.09	0.19	0.49	na	na	na	sag
ETH_00019605	1	0.49	na	na	na	na	na	na	na	na	na	na	na	na	0.05	0.1	0.49	na	na	na	hypothetical protein
ETH_00004390	2	0.49	0.96	1.82	0.53	na	na	na	0.64	1.43	0.45	na	na	na	na	na	na	na	na	na	hypothetical protein
ETH_00022210	1	0.49	na	na	na	na	na	na	na	na	na	na	na	na	0.23	0.48	0.49	na	na	na	microsomal glutathione S-transferase 3, putative
ETH_00034340	6	0.49	0.68	1.65	0.41	0.8	1.83	0.44	0.8	1.62	0.5	0.74	1.96	0.38	0.07	0.1	0.67	1.08	2.05	0.53	hypothetical protein
ETH_00008935	1	0.49	na	na	na	na	na	na	na	na	na	na	na	na	0.1	0.2	0.49	NaN	NaN	NaN	hypothetical protein, conserved
ETH_00034915	1	0.49	na	na	na	na	na	na	na	na	na	na	na	na	0.08	0.16	0.49	na	na	na	sag
ETH_00023605	1	0.49	na	na	na	na	na	na	na	na	na	na	na	na	0.07	0.14	0.49	na	na	na	hypothetical protein
ETH_00009860	2	0.48	1.34	1.48	0.9	NaN	NaN	NaN	NaN	NaN	NaN	na	na	na	0.01	0.19	0.07	na	na	na	hypothetical protein, conserved
ETH_00031095	1	0.48	na	na	na	na	na	na	na	na	na	na	na	na	0.17	0.35	0.48	na	na	na	hypothetical protein
ETH_00007540	1	0.48	na	na	na	na	na	na	na	na	na	na	na	na	0.18	0.37	0.48	na	na	na	zinc finger (C3HC4 type RING finger) protein, putative
ETH_00010860	1	0.48	na	na	na	na	na	na	na	na	na	na	na	na	0.06	0.13	0.48	na	na	na	sag
ETH_00031495	1	0.48	na	na	na	na	na	na	na	na	na	na	na	na	0.12	0.24	0.48	na	na	na	esf1 family
ETH_00007735	1	0.48	na	na	na	na	na	na	na	na	na	na	na	na	0.07	0.15	0.48	na	na	na	hypothetical protein
ETH_00003630	1	0.48	na	na	na	na	na	na	na	na	na	na	na	na	0.25	0.52	0.48	na	na	na	hypothetical protein
ETH_00042820	6	0.48	0.42	1.04	0.4	0.49	0.71	0.68	0.73	1.83	0.4	0.5	1.12	0.45	0.15	0.33	0.45	0.72	1.45	0.5	hypothetical protein
ETH_00041115	1	0.48	na	na	na	na	na	na	na	na	na	na	na	na	0.06	0.12	0.48	na	na	na	na
ETH_00016235	1	0.48	na	na	na	na	na	na	na	na	na	na	na	na	0.07	0.15	0.48	na	na	na	hypothetical protein
ETH_00020820	1	0.48	na	na	na	na	na	na	na	na	na	na	na	na	0.16	0.34	0.48	na	na	na	hypothetical protein
ETH_00015965	2	0.48	na	na	na	0.51	1.05	0.48	NaN	NaN	NaN	na	na	na	0.07	0.15	0.47	NaN	NaN	NaN	hypothetical protein
ETH_00030520	1	0.48	na	na	na	na	na	na	na	na	na	na	na	na	0.05	0.11	0.48	na	na	na	hypothetical protein
ETH_00020665	1	0.48	na	na	na	na	na	na	na	na	na	na	na	na	0.06	0.12	0.48	na	na	na	hypothetical protein
ETH_00016725	1	0.48	na	na	na	na	na	na	na	na	na	na	na	na	0.09	0.19	0.48	na	na	na	hypothetical protein
ETH_00030320	1	0.48	na	na	na	na	na	na	NaN	NaN	NaN	na	na	na	0.11	0.23	0.48	NaN	NaN	NaN	hypothetical protein
ETH_00035410	3	0.48	0.67	1.56	0.43	0.95	2.65	0.36	na	na	na	na	na	na	0.48	0.75	0.64	na	na	na	hypothetical protein
ETH_00041345	1	0.47	na	na	na	na	na	na	na	na	na	na	na	na	0.1	0.21	0.47	na	na	na	hypothetical protein
ETH_00007305	2	0.47	NaN	NaN	NaN	0.71	1.88	0.38	NaN	NaN	NaN	NaN	NaN	NaN	0.06	0.1	0.57	NaN	NaN	NaN	hypothetical protein, conserved
ETH_00029860	1	0.47	na	na	na	na	na	na	na	na	na	na	na	na	0.09	0.2	0.47	na	na	na	hypothetical protein
ETH_00011105	1	0.47	na	na	na	na	na	na	na	na	na	na	na	na	0.07	0.14	0.47	na	na	na	hypothetical protein
ETH_00028435	1	0.47	na	na	na	na	na	na	na	na	na	na	na	na	0.03	0.07	0.47	na	na	na	DnaJ domain-containing protein, putative
ETH_00019120	5	0.47	0.73	1.21	0.6	0.65	1.46	0.44	na	na	na	0.74	1.88	0.39	0.05	0.1	0.52	0.72	1.75	0.41	hypothetical protein
ETH_00020265	1	0.47	na	na	na	na	na	na	na	na	na	na	na	na	0.03	0.06	0.47	NaN	NaN	NaN	adenylate kinase, putative
ETH_00043640	4	0.47	na	na	na	0.3	0.72	0.41	NaN	NaN	NaN	0.98	1.72	0.57	0.04	0.08	0.52	0.93	2.49	0.37	hypothetical protein
ETH_00018990	1	0.47	na	na	na	na	na	na	NaN	NaN	NaN	na	na	na	0.05	0.12	0.47	NaN	NaN	NaN	hypothetical protein
ETH_00002055	1	0.47	NaN	NaN	NaN	na	na	na	na	na	na	na	na	na	0.1	0.2	0.47	na	na	na	hypothetical protein, conserved
ETH_00042485	4	0.47	NaN	NaN	NaN	0.53	1.3	0.41	NaN	NaN	NaN	0.96	1.57	0.61	0.84	1.73	0.49	1.03	2.82	0.37	WD domain, G-beta repeat-containing protein, putative
ETH_00009925	1	0.47	na	na	na	na	na	na	na	na	na	na	na	na	0.08	0.16	0.47	na	na	na	hypothetical protein
ETH_00040990	1	0.47	NaN	NaN	NaN	na	na	na	na	na	na	na	na	na	0.09	0.2	0.47	na	na	na	na
ETH_00029040	1	0.47	na	na	na	na	na	na	na	na	na	na	na	na	0.06	0.13	0.47	na	na	na	hypothetical protein
ETH_00012775	4	0.47	0.42	1.84	0.23	1.32	2.23	0.59	na	na	na	na	na	na	0.05	0.05	0.87	0.46	2.47	0.18	hypothetical protein
ETH_00003405	1	0.47	na	na	na	na	na	na	na	na	na	na	na	na	0.03	0.07	0.47	na	na	na	hypothetical protein
ETH_00011055	1	0.47	na	na	na	na	na	na	na	na	na	na	na	na	0.05	0.11	0.47	na	na	na	hypothetical protein
ETH_00015080	1	0.47	na	na	na	na	na	na	na	na	na	na	na	na	0.05	0.11	0.47	na	na	na	hypothetical protein
ETH_00014305	6	0.46	0.8	4.31	0.18	0.8	2.85	0.28	1.01	3.27	0.31	0.78	2.13	0.37	0.16	0.12	1.31	0.78	2.34	0.33	hypothetical protein
ETH_00011960	3	0.46	0.66	1.32	0.5	0.8	1.57	0.51	na	na	na	na	na	na	0.04	0.11	0.38	na	na	na	hypothetical protein
ETH_00024020	1	0.46	na	na	na	na	na	na	na	na	na	na	na	na	0.08	0.16	0.46	na	na	na	hypothetical protein
ETH_00036325	2	0.46	na	na	na	0.47	1.13	0.42	na	na	na	na	na	na	0.15	0.29	0.51	na	na	na	hypothetical protein
ETH_00038495	4	0.46	1.11	1.3	0.85	0.49	2.34	0.21	na	na	na	0.61	1.74	0.35	0.09	0.2	0.44	NaN	NaN	NaN	hypothetical protein
ETH_00013095	3	0.46	na	na	na	0.47	1.3	0.36	na	na	na	0.47	1.39	0.34	0.08	0.12	0.68	na	na	na	hypothetical protein
ETH_00005140	1	0.46	na	na	na	na	na	na	na	na	na	na	na	na	0.06	0.12	0.46	na	na	na	hypothetical protein
ETH_00026200	4	0.46	0.98	1.89	0.52	1.06	1.63	0.65	na	na	na	0.97	2.19	0.44	0.97	4.35	0.22	NaN	NaN	NaN	hypothetical protein
ETH_00028645	4	0.46	na	na	na	0.42	1.06	0.39	na	na	na	0.61	1.83	0.33	0.07	0.13	0.58	0.64	1.18	0.54	hypothetical protein
ETH_00032390	4	0.46	0.42	6.33	0.07	0.56	1.96	0.29	NaN	NaN	NaN	0.89	1.28	0.69	0.25	0.32	0.79	NaN	NaN	NaN	serine/threonine protein phosphatase, putative
ETH_00027490	1	0.46	na	na	na	na	na	na	na	na	na	na	na	na	0.04	0.08	0.46	na	na	na	hypothetical protein
ETH_00033335	1	0.46	na	na	na	na	na	na	na	na	na	na	na	na	0.06	0.13	0.46	na	na	na	hypothetical protein
ETH_00000995	1	0.46	na	na	na	na	na	na	na	na	na	na	na	na	0.06	0.13	0.46	na	na	na	hypothetical protein
ETH_00008830	1	0.46	na	na	na	na	na	na	na	na	na	na	na	na	0.06	0.14	0.46	na	na	na	hypothetical protein
ETH_00014850	5	0.46	0.54	0.75	0.72	0.73	1.66	0.44	0.48	0.86	0.56	0.51	1.29	0.4	0.02	0.11	0.18	na	na	na	hypothetical protein
ETH_00015350	3	0.46	na	na	na	0.32	1.34	0.24	na	na	na	0.48	1.44	0.33	0.06	0.07	0.8	na	na	na	hypothetical protein
ETH_00020395	1	0.46	na	na	na	na	na	na	na	na	na	na	na	na	0.02	0.04	0.46	na	na	na	hypothetical protein
ETH_00012635	1	0.46	na	na	na	na	na	na	na	na	na	na	na	na	0.05	0.11	0.46	na	na	na	hypothetical protein
ETH_00007530	3	0.46	na	na	na	0.77	2.32	0.33	na	na	na	0.65	1.69	0.39	0.1	0.15	0.65	na	na	na	hypothetical protein, conserved
ETH_00006105	1	0.46	na	na	na	na	na	na	na	na	na	na	na	na	0.35	0.77	0.46	na	na	na	hypothetical protein
ETH_00020865	3	0.46	1.12	1.66	0.68	0.87	1.88	0.47	NaN	NaN	NaN	na	na	na	na	na	na	1.13	4.98	0.23	hypothetical protein
ETH_00024260	5	0.46	0.48	1.44	0.33	0.5	1.13	0.44	0.52	1.42	0.37	0.48	1.46	0.33	0.57	0.7	0.81	NaN	NaN	NaN	hypothetical protein, conserved
ETH_00014695	2	0.46	0.59	3.65	0.16	na	na	na	na	na	na	na	na	na	0.22	0.3	0.75	na	na	na	hypothetical protein
ETH_00018340	1	0.46	na	na	na	na	na	na	na	na	na	na	na	na	0.26	0.58	0.46	na	na	na	hypothetical protein
ETH_00009210	3	0.46	na	na	na	na	na	na	0.67	2.03	0.33	na	na	na	0.06	0.09	0.71	0.8	2.43	0.33	hypothetical protein
ETH_00017080	5	0.46	0.91	3.34	0.27	0.79	2.13	0.37	na	na	na	0.84	1.97	0.43	0.09	0.12	0.75	0.88	1.88	0.47	hypothetical protein
ETH_00029850	4	0.46	0.42	1.35	0.32	0.4	1.58	0.25	na	na	na	na	na	na	0.12	0.18	0.69	0.58	1.02	0.57	hypothetical protein
ETH_00037190	1	0.45	NaN	NaN	NaN	NaN	NaN	NaN	NaN	NaN	NaN	na	na	na	0.11	0.24	0.45	na	na	na	hypothetical protein
ETH_00026870	1	0.45	na	na	na	NaN	NaN	NaN	na	na	na	na	na	na	0.04	0.09	0.45	NaN	NaN	NaN	hypothetical protein
ETH_00013795	3	0.45	na	na	na	0.75	1.91	0.39	0.87	2.62	0.33	na	na	na	0.07	0.12	0.64	NaN	NaN	NaN	hypothetical protein
ETH_00010755	1	0.45	na	na	na	na	na	na	na	na	na	na	na	na	0.1	0.22	0.45	na	na	na	sag
ETH_00019500	1	0.45	NaN	NaN	NaN	na	na	na	NaN	NaN	NaN	na	na	na	0.04	0.08	0.45	NaN	NaN	NaN	hypothetical protein, conserved
ETH_00042725	3	0.45	0.51	2.06	0.25	na	na	na	0.88	3.64	0.24	NaN	NaN	NaN	na	na	na	1.21	1.38	0.87	hypothetical protein
ETH_00022470	3	0.45	na	na	na	0.33	1.2	0.27	NaN	NaN	NaN	0.27	1.56	0.17	0.22	0.24	0.92	na	na	na	hypothetical protein
ETH_00041220	3	0.45	na	na	na	NaN	NaN	NaN	0.78	1.44	0.54	0.92	1.24	0.74	0.01	0.11	0.08	na	na	na	microneme protein, putative
ETH_00015820	2	0.45	na	na	na	na	na	na	0.51	2.23	0.23	na	na	na	0.18	0.27	0.68	na	na	na	hypothetical protein, conserved
ETH_00010385	1	0.45	na	na	na	na	na	na	na	na	na	na	na	na	0.04	0.09	0.45	na	na	na	hypothetical protein
ETH_00027285	1	0.45	na	na	na	na	na	na	na	na	na	na	na	na	0.05	0.11	0.45	na	na	na	hypothetical protein, conserved
ETH_00012425	1	0.45	na	na	na	na	na	na	na	na	na	na	na	na	0.06	0.13	0.45	na	na	na	hypothetical protein
ETH_00014465	2	0.45	NaN	NaN	NaN	na	na	na	NaN	NaN	NaN	na	na	na	0.08	0.14	0.53	0.63	1.67	0.38	hypothetical protein
ETH_00033270	1	0.45	na	na	na	na	na	na	na	na	na	na	na	na	0.06	0.14	0.45	na	na	na	hypothetical protein
ETH_00030470	1	0.45	na	na	na	na	na	na	na	na	na	na	na	na	0.41	0.9	0.45	na	na	na	hypothetical protein
ETH_00003845	5	0.45	0.96	2.17	0.44	0.93	1.45	0.64	1.01	3.73	0.27	0.94	2.36	0.4	na	na	na	0.9	1.77	0.51	hypothetical protein
ETH_00010915	5	0.45	0.44	0.97	0.46	0.38	0.89	0.42	na	na	na	0.39	1.06	0.36	0.03	0.04	0.63	0.47	1.23	0.38	hypothetical protein
ETH_00017425	3	0.45	0.36	3.04	0.12	na	na	na	1.06	2.17	0.49	0.88	1.18	0.75	na	na	na	NaN	NaN	NaN	hypothetical protein, conserved
ETH_00017935	2	0.45	NaN	NaN	NaN	na	na	na	na	na	na	na	na	na	0.09	0.18	0.49	0.61	1.48	0.41	hypothetical protein
ETH_00023830	2	0.45	0.4	1.38	0.29	NaN	NaN	NaN	na	na	na	na	na	na	0.41	0.67	0.61	na	na	na	hypothetical protein
ETH_00018310	2	0.45	0.72	1.8	0.4	na	na	na	na	na	na	na	na	na	0.06	0.12	0.5	na	na	na	esf1 family
ETH_00014895	2	0.45	0.47	1.86	0.25	na	na	na	na	na	na	NaN	NaN	NaN	0.05	0.07	0.65	NaN	NaN	NaN	hypothetical protein
ETH_00008685	1	0.45	na	na	na	na	na	na	na	na	na	na	na	na	0.1	0.23	0.45	na	na	na	sag
ETH_00033550	1	0.45	na	na	na	na	na	na	na	na	na	na	na	na	0.12	0.26	0.45	na	na	na	hypothetical protein
ETH_00022675	3	0.45	0.57	1.35	0.42	na	na	na	NaN	NaN	NaN	na	na	na	0.07	0.11	0.57	0.58	1.62	0.36	hypothetical protein
ETH_00025410	1	0.45	NaN	NaN	NaN	na	na	na	na	na	na	na	na	na	0.13	0.29	0.45	na	na	na	hypothetical protein
ETH_00021575	4	0.45	0.61	1.88	0.32	na	na	na	0.64	1.57	0.41	NaN	NaN	NaN	0.09	0.14	0.61	0.58	1.3	0.45	hypothetical protein
ETH_00026525	1	0.45	NaN	NaN	NaN	na	na	na	NaN	NaN	NaN	na	na	na	0.05	0.12	0.45	na	na	na	zinc finger (CCCH type) protein, putative
ETH_00014660	1	0.45	NaN	NaN	NaN	na	na	na	na	na	na	na	na	na	0.16	0.36	0.45	na	na	na	hypothetical protein
ETH_00005625	1	0.45	na	na	na	na	na	na	na	na	na	na	na	na	0.05	0.12	0.45	na	na	na	hypothetical protein
ETH_00041000	5	0.45	0.35	1.34	0.26	0.91	1.13	0.8	1.1	1.88	0.58	0.36	2.57	0.14	0.11	0.24	0.45	NaN	NaN	NaN	hypothetical protein
ETH_00010845	1	0.45	na	na	na	na	na	na	na	na	na	na	na	na	0.08	0.19	0.45	na	na	na	sag
ETH_00040575	2	0.45	0.52	1.18	0.44	na	na	na	na	na	na	na	na	na	0.06	0.12	0.45	na	na	na	hypothetical protein
ETH_00041180	3	0.45	na	na	na	0.49	1.58	0.31	NaN	NaN	NaN	NaN	NaN	NaN	0.14	0.22	0.64	0.84	2.16	0.39	hypothetical protein, conserved
ETH_00004105	2	0.45	NaN	NaN	NaN	na	na	na	0.41	1.26	0.32	na	na	na	0.03	0.06	0.57	na	na	na	RNA-binding protein, putative
ETH_00022610	6	0.45	0.54	1.23	0.44	0.55	1.71	0.32	0.6	1.58	0.38	0.54	1.49	0.36	0.06	0.08	0.76	0.59	1.41	0.41	hypothetical protein
ETH_00042360	1	0.45	na	na	na	na	na	na	na	na	na	na	na	na	0.49	1.11	0.45	na	na	na	na
ETH_00015180	2	0.45	NaN	NaN	NaN	0.93	1.48	0.63	na	na	na	na	na	na	0.11	0.43	0.26	na	na	na	zinc finger (C3HC4 RING finger) protein, putative
ETH_00019640	6	0.45	0.56	1.31	0.43	0.52	2.01	0.26	0.5	2.01	0.25	0.6	1.1	0.54	0.28	0.38	0.74	0.73	1.62	0.45	hypothetical protein
ETH_00039680	5	0.44	0.39	1.3	0.3	NaN	NaN	NaN	0.73	1.25	0.59	0.59	1.29	0.45	0.24	0.4	0.61	0.46	1.65	0.28	hypothetical protein
ETH_00030755	1	0.44	na	na	na	na	na	na	na	na	na	na	na	na	0.17	0.38	0.44	na	na	na	hypothetical protein
ETH_00007585	1	0.44	na	na	na	na	na	na	na	na	na	na	na	na	0.04	0.1	0.44	na	na	na	hypothetical protein
ETH_00030525	1	0.44	na	na	na	NaN	NaN	NaN	na	na	na	na	na	na	0.06	0.13	0.44	na	na	na	hypothetical protein
ETH_00008740	1	0.44	na	na	na	na	na	na	na	na	na	na	na	na	0.07	0.15	0.44	na	na	na	sag
ETH_00028895	1	0.44	na	na	na	na	na	na	na	na	na	na	na	na	0.05	0.11	0.44	na	na	na	hypothetical protein
ETH_00001155	1	0.44	na	na	na	na	na	na	na	na	na	na	na	na	0.13	0.29	0.44	na	na	na	hypothetical protein, conserved
ETH_00023080	5	0.44	0.54	1.62	0.34	0.83	1.37	0.61	NaN	NaN	NaN	0.45	0.74	0.61	0.06	0.18	0.35	0.53	1.72	0.31	hypothetical protein
ETH_00024125	1	0.44	na	na	na	na	na	na	na	na	na	na	na	na	0.27	0.61	0.44	na	na	na	hypothetical protein
ETH_00040685	3	0.44	NaN	NaN	NaN	0.99	1.96	0.5	NaN	NaN	NaN	0.79	2.21	0.36	0.07	0.15	0.46	na	na	na	hypothetical protein, conserved
ETH_00005405	1	0.44	na	na	na	na	na	na	na	na	na	na	na	na	0.04	0.08	0.44	na	na	na	hypothetical protein
ETH_00000410	3	0.44	0.95	1.51	0.63	na	na	na	na	na	na	0.33	1.71	0.19	0.03	0.05	0.49	na	na	na	hypothetical protein
ETH_00031525	6	0.44	0.76	1.74	0.44	0.75	1.78	0.42	0.78	1.69	0.46	0.64	1.82	0.35	0.08	0.11	0.69	0.67	2.43	0.27	esf1 family
ETH_00023770	1	0.44	na	na	na	na	na	na	na	na	na	na	na	na	0.08	0.17	0.44	na	na	na	hypothetical protein
ETH_00001550	4	0.44	0.63	2.01	0.32	NaN	NaN	NaN	0.56	1.46	0.38	na	na	na	0.09	0.12	0.74	0.54	1.68	0.32	hypothetical protein
ETH_00026395	3	0.44	NaN	NaN	NaN	0.63	4.29	0.15	NaN	NaN	NaN	1.15	1.51	0.77	na	na	na	0.98	2.43	0.4	zinc finger (C3HC4 type) / FHA domain-containing protein, putative
ETH_00017650	1	0.44	na	na	na	na	na	na	na	na	na	na	na	na	0.07	0.16	0.44	na	na	na	hypothetical protein
ETH_00033400	1	0.44	na	na	na	na	na	na	na	na	na	na	na	na	0.04	0.08	0.44	na	na	na	hypothetical protein
ETH_00008610	2	0.44	na	na	na	na	na	na	0.77	1.56	0.5	na	na	na	0.06	0.17	0.38	na	na	na	hypothetical protein, conserved
ETH_00012995	3	0.44	0.42	1.07	0.39	0.48	1.37	0.35	na	na	na	na	na	na	0.08	0.14	0.57	na	na	na	hypothetical protein
ETH_00007525	3	0.44	0.69	2.16	0.32	na	na	na	na	na	na	0.9	1.24	0.72	0.06	0.22	0.27	na	na	na	hypothetical protein
ETH_00034780	1	0.44	NaN	NaN	NaN	na	na	na	na	na	na	na	na	na	0.05	0.12	0.44	na	na	na	DNA mismatch repair protein, putative
ETH_00034290	5	0.44	0.98	3.29	0.3	NaN	NaN	NaN	0.92	1.99	0.46	0.44	1.8	0.24	0.18	0.4	0.45	0.81	1.11	0.73	hypothetical protein
ETH_00025950	4	0.44	0.73	2.28	0.32	0.75	2.09	0.36	NaN	NaN	NaN	na	na	na	0.11	0.16	0.7	0.67	1.82	0.37	esf1 family
ETH_00016715	2	0.44	na	na	na	NaN	NaN	NaN	na	na	na	NaN	NaN	NaN	0.07	0.11	0.64	0.83	3.64	0.23	esf1 family
ETH_00037175	1	0.44	na	na	na	na	na	na	na	na	na	na	na	na	0.11	0.25	0.44	na	na	na	hypothetical protein
ETH_00007020	1	0.44	na	na	na	na	na	na	na	na	na	na	na	na	0.06	0.13	0.44	na	na	na	hypothetical protein
ETH_00020960	6	0.44	0.64	1.31	0.49	0.66	1.63	0.41	0.65	1.7	0.39	0.65	1.37	0.47	0.07	0.12	0.55	0.57	1.87	0.31	hypothetical protein
ETH_00004690	4	0.43	0.51	1.21	0.42	na	na	na	0.44	0.99	0.45	0.67	0.86	0.78	0.02	0.18	0.09	NaN	NaN	NaN	hypothetical protein
ETH_00043510	3	0.43	0.97	1.96	0.49	na	na	na	na	na	na	na	na	na	0.63	1.2	0.53	1.08	3.76	0.29	hypothetical protein
ETH_00042925	1	0.43	na	na	na	na	na	na	na	na	na	na	na	na	0.1	0.22	0.43	na	na	na	na
ETH_00036775	1	0.43	na	na	na	na	na	na	na	na	na	na	na	na	0.07	0.15	0.43	na	na	na	hypothetical protein
ETH_00008410	1	0.43	na	na	na	na	na	na	na	na	na	na	na	na	0.26	0.61	0.43	na	na	na	hypothetical protein
ETH_00028060	1	0.43	na	na	na	na	na	na	na	na	na	na	na	na	0.07	0.16	0.43	na	na	na	hypothetical protein
ETH_00000395	1	0.43	na	na	na	na	na	na	NaN	NaN	NaN	na	na	na	0.7	1.62	0.43	NaN	NaN	NaN	subtilase family serine protease, putative
ETH_00034955	1	0.43	na	na	na	na	na	na	na	na	na	na	na	na	0.06	0.13	0.43	na	na	na	sag
ETH_00023980	1	0.43	na	na	na	na	na	na	na	na	na	na	na	na	0.04	0.09	0.43	na	na	na	hypothetical protein
ETH_00043125	5	0.43	0.56	1.12	0.5	0.56	1.26	0.44	0.39	0.9	0.43	0.55	2.01	0.27	na	na	na	0.72	1.42	0.51	hypothetical protein
ETH_00008280	1	0.43	na	na	na	na	na	na	na	na	na	na	na	na	0.11	0.25	0.43	na	na	na	hypothetical protein
ETH_00035810	2	0.43	NaN	NaN	NaN	0.19	1.61	0.12	na	na	na	na	na	na	0.28	0.37	0.74	na	na	na	na
ETH_00022450	3	0.43	na	na	na	0.72	1.56	0.46	na	na	na	na	na	na	0.06	0.13	0.48	0.69	1.94	0.36	hypothetical protein
ETH_00039925	3	0.43	0.25	1.02	0.24	0.92	0.88	1.05	NaN	NaN	NaN	na	na	na	0	0.12	0	na	na	na	hypothetical protein, conserved
ETH_00029790	1	0.43	NaN	NaN	NaN	na	na	na	na	na	na	na	na	na	0.08	0.2	0.43	na	na	na	hypothetical protein
ETH_00010365	5	0.43	0.4	1.17	0.34	na	na	na	0.6	1.23	0.49	0.47	1.14	0.41	0.05	0.08	0.55	0.46	1.29	0.36	hypothetical protein
ETH_00005925	2	0.43	na	na	na	na	na	na	na	na	na	0.68	2.5	0.27	0.05	0.08	0.59	na	na	na	hypothetical protein
ETH_00014700	1	0.43	na	na	na	na	na	na	na	na	na	na	na	na	0.18	0.42	0.43	na	na	na	hypothetical protein
ETH_00034940	1	0.43	na	na	na	na	na	na	na	na	na	na	na	na	0.08	0.18	0.43	na	na	na	sag
ETH_00019900	1	0.43	na	na	na	na	na	na	na	na	na	na	na	na	0.05	0.11	0.43	na	na	na	hypothetical protein
ETH_00031820	6	0.43	0.6	1.35	0.44	0.57	1.44	0.39	0.65	1.27	0.51	0.57	1.53	0.37	0.05	0.12	0.43	0.63	1.45	0.44	hypothetical protein
ETH_00002730	1	0.43	na	na	na	na	na	na	na	na	na	na	na	na	0.22	0.5	0.43	na	na	na	hypothetical protein
ETH_00022415	5	0.43	NaN	NaN	NaN	0.83	2.27	0.37	0.81	4.89	0.17	0.88	1.91	0.46	0.1	0.12	0.84	0.79	2.55	0.31	esf2 family
ETH_00010870	1	0.43	na	na	na	na	na	na	na	na	na	na	na	na	0.04	0.09	0.43	na	na	na	hypothetical protein
ETH_00004015	1	0.43	na	na	na	na	na	na	na	na	na	na	na	na	0.06	0.15	0.43	na	na	na	hypothetical protein
ETH_00020620	1	0.43	na	na	na	na	na	na	na	na	na	na	na	na	0.04	0.09	0.43	na	na	na	hypothetical protein
ETH_00017560	3	0.43	na	na	na	0.93	1.41	0.66	na	na	na	1.32	3.15	0.42	na	na	na	0.39	1.9	0.21	hypothetical protein
ETH_00042195	2	0.43	na	na	na	0.71	0.97	0.73	na	na	na	na	na	na	0.02	0.17	0.12	na	na	na	hypothetical protein, conserved
ETH_00024140	1	0.43	na	na	na	na	na	na	na	na	na	na	na	na	0.07	0.16	0.43	na	na	na	hypothetical protein, conserved
ETH_00031780	2	0.43	0.52	1.6	0.33	na	na	na	na	na	na	na	na	na	0.07	0.12	0.53	na	na	na	hypothetical protein
ETH_00006180	3	0.43	0.51	1.27	0.4	0.58	1.67	0.35	na	na	na	na	na	na	0.1	0.18	0.53	na	na	na	hypothetical protein
ETH_00010665	2	0.43	na	na	na	0.25	1.87	0.13	NaN	NaN	NaN	na	na	na	0.51	0.7	0.72	na	na	na	hypothetical protein, conserved
ETH_00037805	1	0.43	na	na	na	na	na	na	na	na	na	na	na	na	0.04	0.09	0.43	na	na	na	hypothetical protein
ETH_00028205	1	0.43	na	na	na	na	na	na	na	na	na	na	na	na	0.04	0.1	0.43	na	na	na	hypothetical protein
ETH_00038890	5	0.43	0.72	1.1	0.65	0.83	3.2	0.26	0.73	1.85	0.4	0.77	1.49	0.52	0.05	0.15	0.31	NaN	NaN	NaN	hypothetical protein
ETH_00009695	1	0.43	na	na	na	na	na	na	na	na	na	na	na	na	0.03	0.08	0.43	na	na	na	hypothetical protein
ETH_00042215	1	0.43	na	na	na	na	na	na	na	na	na	na	na	na	0.05	0.13	0.43	na	na	na	hypothetical protein
ETH_00009995	1	0.43	na	na	na	na	na	na	na	na	na	na	na	na	0.12	0.29	0.43	na	na	na	hypothetical protein
ETH_00023825	1	0.43	na	na	na	na	na	na	na	na	na	na	na	na	0.04	0.09	0.43	na	na	na	hypothetical protein
ETH_00043325	1	0.43	na	na	na	na	na	na	na	na	na	na	na	na	0.03	0.07	0.43	na	na	na	hypothetical protein
ETH_00035505	2	0.43	0.31	2.4	0.13	1.29	1.79	0.72	NaN	NaN	NaN	NaN	NaN	NaN	na	na	na	NaN	NaN	NaN	corA-like Mg2+ transporter domain-containing protein, putative
ETH_00002095	3	0.43	NaN	NaN	NaN	0.8	1.59	0.5	na	na	na	0.79	1.53	0.52	0.19	0.74	0.25	NaN	NaN	NaN	hypothetical protein
ETH_00001585	1	0.42	na	na	na	na	na	na	na	na	na	na	na	na	0.12	0.29	0.42	na	na	na	hypothetical protein
ETH_00008940	2	0.42	na	na	na	na	na	na	0.38	1.31	0.29	na	na	na	0.27	0.48	0.56	na	na	na	hypothetical protein
ETH_00028055	3	0.42	na	na	na	0.32	1.31	0.24	na	na	na	0.47	1.24	0.38	0.06	0.09	0.65	na	na	na	hypothetical protein
ETH_00025325	1	0.42	NaN	NaN	NaN	na	na	na	na	na	na	na	na	na	na	na	na	0.91	2.14	0.42	hypothetical protein
ETH_00034095	5	0.42	0.66	1.27	0.52	0.45	1.24	0.36	0.4	1.9	0.21	0.67	1.46	0.46	0.1	0.18	0.56	NaN	NaN	NaN	hypothetical protein
ETH_00042920	4	0.42	NaN	NaN	NaN	0.57	1.84	0.31	0.59	3.03	0.19	0.81	3.39	0.24	0.1	0.1	0.95	na	na	na	hypothetical protein
ETH_00041705	3	0.42	0.35	1.67	0.21	1.02	1.48	0.69	0.53	1.43	0.37	NaN	NaN	NaN	na	na	na	NaN	NaN	NaN	na
ETH_00043650	1	0.42	na	na	na	na	na	na	na	na	na	0.71	1.68	0.42	na	na	na	na	na	na	hypothetical protein
ETH_00030060	2	0.42	na	na	na	0.4	1.17	0.35	na	na	na	na	na	na	0.04	0.08	0.5	na	na	na	hypothetical protein
ETH_00015870	1	0.42	NaN	NaN	NaN	na	na	na	NaN	NaN	NaN	na	na	na	0.07	0.16	0.42	na	na	na	hypothetical protein
ETH_00010315	2	0.42	NaN	NaN	NaN	na	na	na	0.77	1.63	0.47	na	na	na	0.1	0.27	0.37	NaN	NaN	NaN	hypothetical protein
ETH_00024940	1	0.42	na	na	na	na	na	na	na	na	na	na	na	na	0.09	0.22	0.42	na	na	na	hypothetical protein
ETH_00016325	1	0.42	na	na	na	na	na	na	na	na	na	na	na	na	0.05	0.12	0.42	na	na	na	hypothetical protein
ETH_00014520	4	0.42	0.42	1.13	0.37	na	na	na	0.39	1.16	0.34	0.57	1	0.57	0.06	0.14	0.4	na	na	na	hypothetical protein
ETH_00038395	6	0.42	0.41	1	0.41	0.65	1.59	0.41	0.43	2.05	0.21	0.55	1.3	0.42	0.09	0.16	0.57	0.63	1.25	0.51	hypothetical protein
ETH_00008850	1	0.42	na	na	na	na	na	na	na	na	na	na	na	na	0.04	0.11	0.42	na	na	na	hypothetical protein, conserved
ETH_00035175	4	0.42	0.85	1.77	0.48	na	na	na	0.78	1.74	0.45	0.94	1.67	0.56	0.06	0.31	0.19	na	na	na	malate:quinone oxidoreductase, putative
ETH_00024235	1	0.42	na	na	na	na	na	na	na	na	na	na	na	na	0.09	0.22	0.42	na	na	na	hypothetical protein
ETH_00004995	2	0.42	1.17	1.86	0.63	NaN	NaN	NaN	na	na	na	na	na	na	1.13	5.39	0.21	NaN	NaN	NaN	hypothetical protein
ETH_00034775	3	0.42	0.28	1.39	0.2	na	na	na	0.38	1.85	0.2	na	na	na	0.22	0.26	0.86	na	na	na	pyrroline-5-carboxylate reductase, putative
ETH_00011620	1	0.42	NaN	NaN	NaN	NaN	NaN	NaN	NaN	NaN	NaN	NaN	NaN	NaN	0.04	0.1	0.42	NaN	NaN	NaN	hypothetical protein, conserved
ETH_00010600	2	0.42	0.45	2.2	0.21	na	na	na	na	na	na	na	na	na	0.06	0.09	0.63	na	na	na	hypothetical protein
ETH_00035795	4	0.42	0.48	2.52	0.19	NaN	NaN	NaN	1.16	1.75	0.66	na	na	na	0.13	0.31	0.43	0.36	0.91	0.39	na
ETH_00018745	1	0.42	na	na	na	na	na	na	na	na	na	na	na	na	0.07	0.17	0.42	na	na	na	hypothetical protein
ETH_00020790	3	0.42	0.92	2.33	0.39	0.93	1.53	0.61	NaN	NaN	NaN	na	na	na	0.04	0.17	0.25	NaN	NaN	NaN	hypothetical protein
ETH_00014610	2	0.42	na	na	na	0.45	1.52	0.3	na	na	na	na	na	na	0.16	0.29	0.54	na	na	na	hypothetical protein
ETH_00011580	4	0.42	0.78	2.05	0.38	0.81	2.3	0.35	0.86	2.06	0.42	na	na	na	0.06	0.12	0.52	na	na	na	hypothetical protein
ETH_00013190	1	0.42	na	na	na	na	na	na	na	na	na	na	na	na	0.07	0.16	0.42	na	na	na	hypothetical protein
ETH_00000710	6	0.42	0.59	1.67	0.35	0.63	1.57	0.4	0.66	1.77	0.37	0.64	1.69	0.38	0.06	0.11	0.55	0.64	1.45	0.44	hypothetical protein
ETH_00008155	1	0.41	NaN	NaN	NaN	NaN	NaN	NaN	na	na	na	NaN	NaN	NaN	0.09	0.22	0.41	NaN	NaN	NaN	hypothetical protein
ETH_00038285	1	0.41	na	na	na	na	na	na	na	na	na	na	na	na	0.49	1.18	0.41	na	na	na	hypothetical protein
ETH_00009180	5	0.41	0.71	1.67	0.42	0.55	1.14	0.48	0.65	1.57	0.42	na	na	na	0.05	0.09	0.49	0.6	2.33	0.26	hypothetical protein
ETH_00030815	4	0.41	na	na	na	na	na	na	0.48	1.98	0.24	0.98	2.48	0.39	0.08	0.11	0.73	0.46	1.57	0.29	hypothetical protein
ETH_00015655	2	0.41	na	na	na	0.17	1.4	0.12	na	na	na	na	na	na	0.16	0.23	0.71	na	na	na	hypothetical protein
ETH_00002135	6	0.41	0.71	1.52	0.47	0.71	1.44	0.49	0.54	1.9	0.28	0.56	1.4	0.4	0.09	0.15	0.61	0.64	2.85	0.23	hypothetical protein
ETH_00018205	5	0.41	0.64	1.91	0.33	NaN	NaN	NaN	0.66	2.05	0.32	0.66	2.47	0.27	0.07	0.12	0.63	0.64	1.25	0.51	hypothetical protein
ETH_00006055	3	0.41	0.63	1.38	0.45	na	na	na	na	na	na	na	na	na	0.11	0.29	0.38	0.71	1.77	0.4	hypothetical protein
ETH_00001420	4	0.41	0.76	2.63	0.29	na	na	na	0.69	1.84	0.38	na	na	na	0.07	0.1	0.7	0.68	2.37	0.29	hypothetical protein
ETH_00021805	1	0.41	na	na	na	na	na	na	na	na	na	na	na	na	0.16	0.4	0.41	na	na	na	hypothetical protein
ETH_00002220	3	0.41	NaN	NaN	NaN	0.75	1.44	0.52	NaN	NaN	NaN	NaN	NaN	NaN	0.04	0.1	0.44	0.59	2.12	0.28	hypothetical protein
ETH_00013685	6	0.41	0.55	1.24	0.44	0.54	1.33	0.41	0.57	1.46	0.39	0.54	1.32	0.41	0.05	0.11	0.41	0.55	1.36	0.41	hypothetical protein, conserved
ETH_00000560	1	0.41	na	na	na	NaN	NaN	NaN	na	na	na	na	na	na	0.14	0.34	0.41	na	na	na	hypothetical protein, conserved
ETH_00010792	1	0.41	na	na	na	na	na	na	na	na	na	na	na	na	0.07	0.16	0.41	na	na	na	sag
ETH_00004255	5	0.41	0.54	1.91	0.28	0.9	2.36	0.38	0.95	2.6	0.37	0.63	1.27	0.5	0.22	0.42	0.53	na	na	na	hypothetical protein
ETH_00040300	5	0.41	0.53	1.74	0.3	0.95	2.25	0.42	0.88	3.33	0.27	0.97	1.58	0.61	0.19	0.41	0.46	na	na	na	hypothetical protein
ETH_00016445	5	0.41	0.51	1.04	0.49	0.41	1.51	0.27	na	na	na	0.51	1.18	0.43	0.09	0.18	0.5	0.95	2.57	0.37	hypothetical protein
ETH_00000910	2	0.41	NaN	NaN	NaN	0.88	2.25	0.39	na	na	na	na	na	na	0.05	0.12	0.43	NaN	NaN	NaN	hypothetical protein
ETH_00026610	2	0.41	NaN	NaN	NaN	NaN	NaN	NaN	NaN	NaN	NaN	NaN	NaN	NaN	0.03	0.04	0.78	0.11	3.04	0.04	dynein light chain type 1, putative
ETH_00000130	1	0.41	na	na	na	na	na	na	na	na	na	na	na	na	0.04	0.1	0.41	na	na	na	hypothetical protein
ETH_00012910	1	0.41	na	na	na	na	na	na	na	na	na	na	na	na	0.11	0.26	0.41	na	na	na	zinc finger (C3HC4 RING finger) protein, putative
ETH_00019400	4	0.41	0.45	0.86	0.53	na	na	na	0.56	1.2	0.47	0.39	1.11	0.35	na	na	na	0.33	1.11	0.3	hypothetical protein
ETH_00000680	6	0.41	0.72	1.59	0.45	0.6	1.54	0.39	0.63	1.54	0.41	0.6	1.87	0.32	0.05	0.11	0.49	0.55	1.4	0.4	hypothetical protein
ETH_00035540	4	0.41	na	na	na	0.84	1.72	0.49	0.48	1.13	0.43	0.44	1.32	0.33	na	na	na	0.7	1.8	0.39	hypothetical protein
ETH_00019880	1	0.41	na	na	na	na	na	na	na	na	na	na	na	na	0.07	0.17	0.41	na	na	na	hypothetical protein
ETH_00022730	3	0.41	0.5	1.24	0.41	0.35	1.27	0.28	na	na	na	NaN	NaN	NaN	0.5	0.92	0.54	na	na	na	hypothetical protein
ETH_00038650	2	0.41	0.67	2.06	0.32	na	na	na	0.73	1.47	0.49	na	na	na	na	na	na	na	na	na	hypothetical protein
ETH_00038450	5	0.41	0.35	1.95	0.18	na	na	na	0.5	1.47	0.34	0.38	2	0.19	1	1.3	0.77	0.81	1.44	0.56	hypothetical protein
ETH_00024130	3	0.41	na	na	na	0.72	1.85	0.39	na	na	na	0.73	1.77	0.41	0.06	0.15	0.43	na	na	na	hypothetical protein
ETH_00018375	5	0.41	0.87	3.8	0.23	na	na	na	0.86	1.88	0.46	0.89	2.1	0.42	0.07	0.1	0.75	0.82	4.56	0.18	hypothetical protein
ETH_00043260	1	0.41	na	na	na	na	na	na	na	na	na	na	na	na	0.16	0.38	0.41	na	na	na	hypothetical protein
ETH_00026310	1	0.41	na	na	na	na	na	na	na	na	na	na	na	na	0.07	0.18	0.41	na	na	na	hypothetical protein
ETH_00003900	1	0.41	na	na	na	na	na	na	na	na	na	na	na	na	0.06	0.15	0.41	na	na	na	hypothetical protein
ETH_00022500	3	0.41	0.44	1.9	0.23	na	na	na	na	na	na	0.62	1.31	0.47	0.08	0.16	0.51	na	na	na	hypothetical protein
ETH_00020775	1	0.41	NaN	NaN	NaN	0.76	1.88	0.41	na	na	na	na	na	na	na	na	na	NaN	NaN	NaN	hypothetical protein
ETH_00010850	1	0.41	na	na	na	na	na	na	na	na	na	na	na	na	0.05	0.12	0.41	na	na	na	sag
ETH_00010140	2	0.41	na	na	na	0.4	0.98	0.41	na	na	na	na	na	na	na	na	na	0.48	1.19	0.4	hypothetical protein
ETH_00026810	2	0.4	na	na	na	na	na	na	0.41	1.55	0.26	NaN	NaN	NaN	0.15	0.27	0.55	na	na	na	hypothetical protein, conserved
ETH_00025535	3	0.4	NaN	NaN	NaN	0.26	1.01	0.25	NaN	NaN	NaN	0.87	1.05	0.83	0.01	0.1	0.13	na	na	na	hypothetical protein, conserved
ETH_00042670	3	0.4	NaN	NaN	NaN	NaN	NaN	NaN	0.73	1.16	0.63	0.48	2.19	0.22	0.07	0.19	0.37	na	na	na	hypothetical protein
ETH_00012975	1	0.4	na	na	na	na	na	na	na	na	na	na	na	na	0.08	0.19	0.4	na	na	na	hypothetical protein
ETH_00034205	4	0.4	0.39	3.26	0.12	0.58	1.39	0.41	0.55	1.43	0.39	na	na	na	na	na	na	1.13	1.62	0.7	na
ETH_00018405	1	0.4	NaN	NaN	NaN	NaN	NaN	NaN	NaN	NaN	NaN	na	na	na	0.03	0.07	0.4	na	na	na	hypothetical protein
ETH_00033275	3	0.4	0.73	1.57	0.46	0.7	1.95	0.36	na	na	na	na	na	na	0.12	0.3	0.39	na	na	na	hypothetical protein
ETH_00032695	4	0.4	0.76	1.85	0.41	0.59	1.93	0.31	0.84	1.95	0.43	na	na	na	0.07	0.14	0.47	na	na	na	hypothetical protein
ETH_00024225	1	0.4	na	na	na	na	na	na	na	na	na	NaN	NaN	NaN	0.1	0.25	0.4	na	na	na	hypothetical protein
ETH_00035940	3	0.4	na	na	na	0.5	0.91	0.55	0.3	1.27	0.23	na	na	na	0.14	0.33	0.42	na	na	na	hypothetical protein
ETH_00027180	1	0.4	na	na	na	na	na	na	na	na	na	na	na	na	0.1	0.25	0.4	na	na	na	hypothetical protein
ETH_00025870	5	0.4	0.52	1.11	0.46	na	na	na	0.51	1.93	0.26	0.6	1.26	0.48	0.04	0.13	0.35	0.58	1.28	0.45	hypothetical protein, conserved
ETH_00022340	6	0.4	0.48	1.3	0.37	0.52	1.44	0.36	0.55	1.42	0.39	0.46	1.37	0.33	0.05	0.08	0.58	0.44	1.17	0.38	hypothetical protein
ETH_00018080	2	0.4	0.39	0.87	0.45	na	na	na	NaN	NaN	NaN	na	na	na	0.04	0.12	0.35	na	na	na	hypothetical protein
ETH_00018705	2	0.4	NaN	NaN	NaN	NaN	NaN	NaN	0.75	2.19	0.34	NaN	NaN	NaN	0.05	0.12	0.46	NaN	NaN	NaN	hypothetical protein
ETH_00019805	2	0.4	0.37	1.46	0.25	na	na	na	na	na	na	na	na	na	0.2	0.36	0.55	na	na	na	hypothetical protein, conserved
ETH_00010330	3	0.4	NaN	NaN	NaN	0.4	2.14	0.19	na	na	na	0.33	1.34	0.25	0.2	0.26	0.76	na	na	na	hypothetical protein, conserved
ETH_00009795	1	0.4	NaN	NaN	NaN	NaN	NaN	NaN	NaN	NaN	NaN	NaN	NaN	NaN	0.17	0.43	0.4	NaN	NaN	NaN	hypothetical protein, conserved
ETH_00015680	1	0.4	NaN	NaN	NaN	na	na	na	na	na	na	na	na	na	0.06	0.14	0.4	na	na	na	hypothetical protein
ETH_00008790	3	0.4	na	na	na	na	na	na	0.23	1.46	0.16	0.62	0.71	0.88	0.02	0.14	0.16	na	na	na	hypothetical protein
ETH_00015075	1	0.4	na	na	na	na	na	na	na	na	na	na	na	na	0.04	0.1	0.4	na	na	na	hypothetical protein
ETH_00030085	3	0.4	na	na	na	0.49	2.21	0.22	na	na	na	0.48	1.31	0.36	0.04	0.06	0.61	na	na	na	hypothetical protein, conserved
ETH_00043480	1	0.4	na	na	na	na	na	na	na	na	na	na	na	na	0.04	0.11	0.4	na	na	na	hypothetical protein
ETH_00013300	2	0.4	NaN	NaN	NaN	na	na	na	NaN	NaN	NaN	0.56	1.26	0.45	0.06	0.18	0.35	na	na	na	hypothetical protein
ETH_00007080	3	0.4	0.49	1.47	0.33	na	na	na	na	na	na	na	na	na	0.05	0.08	0.61	0.41	1.63	0.25	hypothetical protein
ETH_00033930	2	0.4	0.59	1.86	0.32	na	na	na	na	na	na	na	na	na	0.29	0.59	0.48	na	na	na	na
ETH_00023220	3	0.4	NaN	NaN	NaN	0.44	2.56	0.17	na	na	na	0.99	1.31	0.76	na	na	na	0.47	1.75	0.27	hypothetical protein
ETH_00017750	1	0.4	na	na	na	NaN	NaN	NaN	na	na	na	na	na	na	0.11	0.26	0.4	na	na	na	hypothetical protein
ETH_00024370	1	0.4	NaN	NaN	NaN	na	na	na	NaN	NaN	NaN	na	na	na	0.06	0.15	0.4	na	na	na	hypothetical protein, conserved
ETH_00018690	1	0.4	na	na	na	na	na	na	na	na	na	na	na	na	0.03	0.07	0.4	na	na	na	hypothetical protein
ETH_00010630	4	0.4	0.35	1.61	0.22	0.36	1.34	0.27	na	na	na	na	na	na	0.27	0.39	0.7	0.76	1.87	0.4	hypothetical protein, conserved
ETH_00035380	2	0.4	na	na	na	0.34	1.14	0.3	na	na	na	na	na	na	0.02	0.04	0.5	na	na	na	hypothetical protein
ETH_00038265	1	0.4	na	na	na	na	na	na	na	na	na	na	na	na	0.11	0.29	0.4	na	na	na	hypothetical protein
ETH_00025970	2	0.4	na	na	na	na	na	na	0	1.18	0	na	na	na	0.34	0.43	0.8	na	na	na	40S ribosomal protein S30, putative
ETH_00009380	2	0.4	0.36	2.37	0.15	NaN	NaN	NaN	NaN	NaN	NaN	na	na	na	0.19	0.29	0.64	na	na	na	hypothetical protein
ETH_00008165	1	0.4	na	na	na	na	na	na	na	na	na	na	na	na	0.04	0.11	0.4	na	na	na	hypothetical protein
ETH_00017280	4	0.4	0.74	2.98	0.25	0.79	1.34	0.59	NaN	NaN	NaN	0.35	1.11	0.31	0.02	0.06	0.44	NaN	NaN	NaN	hypothetical protein
ETH_00001565	5	0.4	0.4	1.46	0.27	0.47	1.86	0.25	0.46	1.46	0.31	na	na	na	0.07	0.14	0.5	0.97	1.5	0.65	hypothetical protein
ETH_00004190	2	0.4	na	na	na	na	na	na	NaN	NaN	NaN	NaN	NaN	NaN	0.06	0.1	0.55	0.38	1.54	0.25	hypothetical protein
ETH_00008670	1	0.4	na	na	na	na	na	na	na	na	na	na	na	na	0.11	0.27	0.4	na	na	na	sag
ETH_00030080	3	0.4	na	na	na	0.4	1.61	0.25	NaN	NaN	NaN	0.33	1.26	0.26	0.44	0.65	0.67	na	na	na	DNA gyrase subunit A, putative
ETH_00011100	3	0.4	0.42	1.26	0.33	na	na	na	0.45	1.59	0.28	na	na	na	0.11	0.19	0.57	na	na	na	hypothetical protein
ETH_00001035	2	0.4	NaN	NaN	NaN	NaN	NaN	NaN	na	na	na	0.52	2.52	0.21	0.14	0.23	0.59	NaN	NaN	NaN	hypothetical protein
ETH_00009215	3	0.4	0.62	1.81	0.34	0.49	1.55	0.32	na	na	na	na	na	na	0.04	0.08	0.53	na	na	na	hypothetical protein
ETH_00016115	2	0.4	na	na	na	na	na	na	0.45	1.55	0.29	na	na	na	0.07	0.15	0.5	na	na	na	FIK kinase (incomplete catalytic triad), putative
ETH_00000870	3	0.4	na	na	na	0.36	1.52	0.23	1.09	1.85	0.59	0.44	1.22	0.36	na	na	na	na	na	na	hypothetical protein
ETH_00002870	1	0.4	na	na	na	na	na	na	na	na	na	na	na	na	0.03	0.07	0.4	na	na	na	hypothetical protein
ETH_00012755	1	0.4	na	na	na	na	na	na	na	na	na	na	na	na	0.12	0.31	0.4	na	na	na	hypothetical protein
ETH_00005835	4	0.4	0.49	1.58	0.31	0.34	1.17	0.29	na	na	na	0.88	1.84	0.48	0.09	0.18	0.5	na	na	na	hypothetical protein
ETH_00025175	4	0.39	0.4	1.17	0.35	0.49	0.91	0.54	0.45	1.06	0.43	na	na	na	na	na	na	0.45	1.67	0.27	hypothetical protein
ETH_00015015	4	0.39	0.42	2.58	0.16	0.37	1.05	0.35	na	na	na	NaN	NaN	NaN	0.31	0.49	0.63	0.79	1.81	0.43	TPR domain-containing protein, putative
ETH_00031730	1	0.39	na	na	na	na	na	na	na	na	na	na	na	na	0.04	0.1	0.39	na	na	na	hypothetical protein
ETH_00024025	1	0.39	na	na	na	na	na	na	na	na	na	na	na	na	0.07	0.17	0.39	na	na	na	hypothetical protein
ETH_00031360	4	0.39	na	na	na	0.66	1.77	0.38	na	na	na	0.5	1.66	0.3	0.09	0.16	0.6	0.72	2.41	0.3	esf1 family
ETH_00002425	5	0.39	0.38	1.25	0.31	0.4	1.35	0.29	0.49	1.44	0.34	na	na	na	0.04	0.06	0.73	0.45	1.51	0.3	hypothetical protein
ETH_00041200	1	0.39	na	na	na	na	na	na	na	na	na	na	na	na	0.14	0.35	0.39	na	na	na	na
ETH_00018070	4	0.39	0.44	1.56	0.28	NaN	NaN	NaN	NaN	NaN	NaN	0.93	1.56	0.6	0.05	0.16	0.3	0.68	1.73	0.39	hypothetical protein
ETH_00019705	2	0.39	na	na	na	0.37	1.14	0.32	na	na	na	na	na	na	0.13	0.28	0.46	na	na	na	CBS domain multi-pass transmembrane protein, putative
ETH_00025070	1	0.39	na	na	na	na	na	na	na	na	na	na	na	na	0.1	0.25	0.39	na	na	na	hypothetical protein
ETH_00010670	1	0.39	na	na	na	na	na	na	na	na	na	na	na	na	0.1	0.24	0.39	na	na	na	hypothetical protein
ETH_00025390	5	0.39	0.51	1.47	0.35	0.56	1.62	0.35	NaN	NaN	NaN	0.51	1.42	0.36	0.07	0.12	0.57	0.51	1.52	0.34	hypothetical protein
ETH_00035530	5	0.39	na	na	na	0.28	1.77	0.16	0.69	1.23	0.56	0.65	1.78	0.36	0.02	0.17	0.14	1.12	1.52	0.74	hypothetical protein
ETH_00038870	4	0.39	na	na	na	0.36	0.84	0.43	0.29	1.26	0.23	0.5	0.88	0.57	na	na	na	1.02	3.07	0.33	hypothetical protein
ETH_00004845	3	0.39	NaN	NaN	NaN	na	na	na	na	na	na	1.15	1.75	0.66	0.06	0.15	0.39	0.33	2.67	0.12	hypothetical protein, conserved
ETH_00007505	5	0.39	0.55	1.13	0.48	0.76	1.59	0.48	0.86	3.76	0.23	0.71	1.27	0.56	0.02	0.09	0.2	na	na	na	hypothetical protein
ETH_00008480	3	0.39	0.13	0.75	0.18	na	na	na	1.19	1.56	0.76	na	na	na	0.02	0.1	0.24	na	na	na	hypothetical protein, conserved
ETH_00010610	2	0.39	na	na	na	na	na	na	na	na	na	0.49	1.91	0.25	0.07	0.13	0.53	na	na	na	hypothetical protein
ETH_00036635	3	0.39	NaN	NaN	NaN	1.06	1.75	0.61	0.96	5.35	0.18	1.1	2.87	0.38	na	na	na	NaN	NaN	NaN	hypothetical protein
ETH_00039720	1	0.39	na	na	na	na	na	na	na	na	na	na	na	na	0.02	0.05	0.39	na	na	na	na
ETH_00000865	2	0.39	0.88	1.76	0.5	na	na	na	na	na	na	NaN	NaN	NaN	0.05	0.19	0.27	na	na	na	hypothetical protein, conserved
ETH_00029645	3	0.39	0.4	1.37	0.29	NaN	NaN	NaN	0.35	1.71	0.2	na	na	na	0.05	0.07	0.67	na	na	na	hypothetical protein
ETH_00039225	3	0.39	0.49	1.79	0.28	0.45	1.37	0.32	NaN	NaN	NaN	na	na	na	0.22	0.4	0.57	NaN	NaN	NaN	hypothetical protein
ETH_00000335	6	0.39	0.56	1.4	0.4	0.57	1.56	0.37	0.59	1.51	0.39	0.65	1.9	0.34	0.06	0.1	0.56	0.48	1.75	0.28	hypothetical protein
ETH_00021040	6	0.39	0.6	1.83	0.32	0.68	1.85	0.37	0.56	1.52	0.37	0.55	1.76	0.31	0.05	0.12	0.44	0.64	1.24	0.52	hypothetical protein
ETH_00030510	3	0.39	0.57	1.77	0.32	0.53	2.21	0.24	na	na	na	na	na	na	0.47	0.78	0.61	na	na	na	hypothetical protein
ETH_00008110	4	0.39	0.72	2.46	0.29	0.73	2.1	0.35	0.93	2.31	0.4	na	na	na	0.13	0.26	0.51	NaN	NaN	NaN	esf2 family
ETH_00025680	6	0.39	0.79	2.24	0.35	0.71	1.83	0.39	0.76	2.02	0.38	0.7	2	0.35	0.07	0.12	0.53	0.83	2.52	0.33	hypothetical protein
ETH_00030350	6	0.39	0.53	1.65	0.32	0.36	1.18	0.3	0.35	1.18	0.29	0.29	1.61	0.18	0.07	0.09	0.73	0.78	1.61	0.49	hypothetical protein
ETH_00014555	1	0.39	na	na	na	na	na	na	NaN	NaN	NaN	NaN	NaN	NaN	0.56	1.46	0.39	NaN	NaN	NaN	ADP-ribosylation factor domain-containing protein, putative
ETH_00000810	4	0.39	0.84	3.01	0.28	0.9	2.89	0.31	0.61	1.55	0.39	na	na	na	0.05	0.1	0.56	na	na	na	hypothetical protein
ETH_00019305	2	0.39	na	na	na	na	na	na	na	na	na	1.05	1.47	0.71	0.01	0.12	0.06	na	na	na	GTP-binding protein, putative
ETH_00036975	3	0.39	na	na	na	0.47	1.39	0.34	na	na	na	0.52	1.23	0.42	0.06	0.15	0.39	NaN	NaN	NaN	hypothetical protein
ETH_00031000	1	0.39	na	na	na	na	na	na	na	na	na	na	na	na	0.03	0.08	0.39	na	na	na	hypothetical protein, conserved
ETH_00026130	1	0.38	na	na	na	na	na	na	na	na	na	na	na	na	0.05	0.13	0.38	na	na	na	hypothetical protein, conserved
ETH_00032785	1	0.38	na	na	na	na	na	na	na	na	na	na	na	na	0.03	0.09	0.38	na	na	na	hypothetical protein
ETH_00021070	4	0.38	0.85	2.34	0.36	0.7	2.97	0.23	NaN	NaN	NaN	0.73	2.06	0.35	0.07	0.12	0.59	NaN	NaN	NaN	esf1 family
ETH_00001180	1	0.38	na	na	na	na	na	na	na	na	na	na	na	na	0.1	0.25	0.38	na	na	na	hypothetical protein
ETH_00030560	1	0.38	na	na	na	NaN	NaN	NaN	na	na	na	na	na	na	0.04	0.09	0.38	na	na	na	hypothetical protein
ETH_00028600	3	0.38	na	na	na	0.49	2.93	0.17	NaN	NaN	NaN	0.51	1.41	0.36	0.29	0.46	0.62	na	na	na	hypothetical protein
ETH_00032735	1	0.38	na	na	na	na	na	na	na	na	na	na	na	na	0.06	0.15	0.38	na	na	na	hypothetical protein
ETH_00009930	2	0.38	na	na	na	na	na	na	na	na	na	0.83	1.64	0.51	0.07	0.28	0.26	na	na	na	hypothetical protein
ETH_00015700	1	0.38	na	na	na	na	na	na	na	na	na	na	na	na	0.16	0.41	0.38	na	na	na	hypothetical protein, conserved
ETH_00025265	5	0.38	0.42	1.18	0.35	0.72	2.26	0.32	0.68	1.45	0.47	na	na	na	0.14	0.38	0.36	0.59	1.39	0.42	hypothetical protein
ETH_00039075	1	0.38	na	na	na	NaN	NaN	NaN	NaN	NaN	NaN	na	na	na	0.06	0.17	0.38	na	na	na	hypothetical protein, conserved
ETH_00001705	1	0.38	na	na	na	na	na	na	na	na	na	na	na	na	0.1	0.26	0.38	na	na	na	hypothetical protein
ETH_00023695	1	0.38	na	na	na	na	na	na	na	na	na	na	na	na	0.07	0.18	0.38	na	na	na	hypothetical protein
ETH_00019275	3	0.38	na	na	na	0.67	2.09	0.32	na	na	na	0.7	1.78	0.39	0.04	0.09	0.44	na	na	na	hypothetical protein
ETH_00039340	3	0.38	0.45	2.14	0.21	na	na	na	0.59	1.82	0.32	0.9	1.48	0.61	na	na	na	na	na	na	zinc carboxypeptidase, putative
ETH_00038465	6	0.38	0.4	1.28	0.31	0.3	1.27	0.24	1.13	1.81	0.63	0.35	1.31	0.26	0.06	0.1	0.63	0.42	1.93	0.22	na
ETH_00020860	1	0.38	na	na	na	na	na	na	na	na	na	na	na	na	0.09	0.24	0.38	na	na	na	hypothetical protein
ETH_00014920	1	0.38	na	na	na	na	na	na	na	na	na	na	na	na	0.07	0.18	0.38	na	na	na	hypothetical protein
ETH_00002580	1	0.38	NaN	NaN	NaN	na	na	na	NaN	NaN	NaN	NaN	NaN	NaN	0.18	0.47	0.38	na	na	na	ubiquitin carboxyl-terminal hydrolase isozyme L5, putative
ETH_00023195	3	0.38	na	na	na	na	na	na	na	na	na	0.75	1.53	0.49	0.07	0.18	0.37	0.42	1.49	0.29	hypothetical protein
ETH_00018390	2	0.38	na	na	na	0.31	1.36	0.23	na	na	na	na	na	na	0.1	0.19	0.53	na	na	na	hypothetical protein, conserved
ETH_00034280	2	0.38	na	na	na	0.45	1.77	0.25	na	na	na	na	na	na	0.12	0.23	0.51	na	na	na	hypothetical protein
ETH_00028235	5	0.38	1.27	1.3	0.98	0.33	1.13	0.29	na	na	na	0.32	1.37	0.23	0.03	0.13	0.19	0.27	1.31	0.21	hypothetical protein
ETH_00036550	2	0.38	0.23	2.13	0.11	na	na	na	NaN	NaN	NaN	1.29	1.99	0.65	na	na	na	NaN	NaN	NaN	na
ETH_00024725	2	0.38	na	na	na	na	na	na	na	na	na	0.33	0.78	0.43	0.04	0.12	0.33	na	na	na	hypothetical protein, conserved
ETH_00030425	1	0.38	na	na	na	na	na	na	na	na	na	na	na	na	0.05	0.13	0.38	na	na	na	hypothetical protein
ETH_00005445	4	0.38	NaN	NaN	NaN	0.87	4.24	0.21	NaN	NaN	NaN	0.71	1.87	0.38	0.06	0.11	0.59	0.74	2.16	0.34	hypothetical protein
ETH_00013515	4	0.38	0.7	2.56	0.27	0.79	2.24	0.35	na	na	na	0.88	2.05	0.43	na	na	na	0.94	2.03	0.46	esf6 family
ETH_00008815	1	0.38	na	na	na	na	na	na	na	na	na	na	na	na	0.03	0.07	0.38	na	na	na	hypothetical protein
ETH_00033000	1	0.38	na	na	na	na	na	na	na	na	na	na	na	na	0.04	0.1	0.38	na	na	na	hypothetical protein
ETH_00018200	4	0.38	0.57	2.17	0.26	na	na	na	NaN	NaN	NaN	0.7	2.17	0.32	0.04	0.06	0.65	0.6	2.2	0.27	hypothetical protein, conserved
ETH_00017865	1	0.38	na	na	na	na	na	na	na	na	na	na	na	na	0.03	0.08	0.38	na	na	na	hypothetical protein
ETH_00041275	1	0.38	na	na	na	na	na	na	na	na	na	na	na	na	0.32	0.84	0.38	na	na	na	hypothetical protein
ETH_00039850	3	0.38	na	na	na	na	na	na	na	na	na	0.57	1.42	0.4	0.03	0.16	0.17	0.88	1.57	0.56	hypothetical protein
ETH_00013230	2	0.38	na	na	na	0.5	1.94	0.26	na	na	na	na	na	na	0.23	0.46	0.5	na	na	na	hypothetical protein
ETH_00028030	3	0.38	0.34	1	0.34	na	na	na	na	na	na	0.28	1.54	0.19	0.12	0.2	0.61	na	na	na	hypothetical protein
ETH_00014735	2	0.38	NaN	NaN	NaN	NaN	NaN	NaN	0.51	3.86	0.13	na	na	na	0.07	0.11	0.62	NaN	NaN	NaN	hypothetical protein
ETH_00012565	1	0.38	NaN	NaN	NaN	na	na	na	na	na	na	na	na	na	0.1	0.28	0.38	na	na	na	hypothetical protein
ETH_00038065	1	0.38	NaN	NaN	NaN	NaN	NaN	NaN	na	na	na	na	na	na	0.69	1.83	0.38	na	na	na	na
ETH_00039200	6	0.38	0.5	1.16	0.43	0.59	1.55	0.38	0.45	1.51	0.3	0.67	1.67	0.4	0.06	0.15	0.36	0.61	1.55	0.39	hypothetical protein
ETH_00039035	1	0.38	na	na	na	na	na	na	na	na	na	0.49	1.3	0.38	na	na	na	na	na	na	na
ETH_00004065	3	0.38	0.46	4.16	0.11	NaN	NaN	NaN	na	na	na	na	na	na	0.18	0.3	0.61	0.47	1.15	0.41	hypothetical protein
ETH_00004245	1	0.38	na	na	na	na	na	na	na	na	na	na	na	na	0.06	0.15	0.38	na	na	na	hypothetical protein
ETH_00014050	1	0.38	na	na	na	NaN	NaN	NaN	na	na	na	na	na	na	0.04	0.11	0.38	na	na	na	hypothetical protein
ETH_00033180	4	0.38	NaN	NaN	NaN	0.73	1.28	0.57	0.69	1.85	0.37	NaN	NaN	NaN	0.04	0.18	0.22	0.8	2.32	0.34	hypothetical protein
ETH_00004945	6	0.38	0.49	1.39	0.35	0.51	1.26	0.41	0.55	0.99	0.55	0.51	1.86	0.27	0.05	0.13	0.4	0.49	1.82	0.27	hypothetical protein
ETH_00034960	1	0.38	na	na	na	na	na	na	na	na	na	na	na	na	0.08	0.22	0.38	na	na	na	sag
ETH_00041760	4	0.37	0.37	0.9	0.41	na	na	na	0.56	2.14	0.26	0.44	1.57	0.28	0.38	0.7	0.55	na	na	na	na
ETH_00003600	4	0.37	0.78	4.4	0.18	0.97	2	0.48	0.79	3.4	0.23	na	na	na	0.38	0.62	0.61	na	na	na	hypothetical protein
ETH_00018350	6	0.37	0.44	1.78	0.25	0.48	2.51	0.19	0.65	1.56	0.42	0.53	1.82	0.29	0.07	0.1	0.68	0.58	1.4	0.41	hypothetical protein
ETH_00034845	1	0.37	na	na	na	na	na	na	na	na	na	na	na	na	0.04	0.1	0.37	na	na	na	hypothetical protein
ETH_00040815	4	0.37	0.35	1.11	0.31	0.29	1.38	0.21	0.34	1.21	0.28	1.04	1.51	0.69	na	na	na	na	na	na	hypothetical protein
ETH_00013245	1	0.37	na	na	na	na	na	na	na	na	na	na	na	na	0.03	0.09	0.37	na	na	na	hypothetical protein
ETH_00013760	6	0.37	0.82	2.16	0.38	0.81	2.26	0.36	0.78	1.88	0.42	0.77	2.45	0.31	0.03	0.07	0.46	0.7	2.27	0.31	hypothetical protein
ETH_00003620	1	0.37	na	na	na	0.81	2.16	0.37	na	na	na	NaN	NaN	NaN	na	na	na	na	na	na	mitotic control protein dis3, putative
ETH_00026865	5	0.37	0.51	2.08	0.25	na	na	na	0.6	1.35	0.44	0.64	2.24	0.29	0.07	0.13	0.5	0.6	1.58	0.38	hypothetical protein
ETH_00038125	3	0.37	0.44	1.47	0.3	NaN	NaN	NaN	1.01	1.98	0.51	NaN	NaN	NaN	0.02	0.06	0.31	na	na	na	hypothetical protein, conserved
ETH_00043215	3	0.37	0.81	1.32	0.61	na	na	na	0.91	2.09	0.44	NaN	NaN	NaN	0.01	0.1	0.07	na	na	na	hypothetical protein, conserved
ETH_00039475	6	0.37	0.24	1.23	0.19	0.34	1.26	0.27	0.23	1.14	0.21	0.46	1.31	0.35	0.09	0.12	0.69	0.52	1	0.52	hypothetical protein
ETH_00017685	1	0.37	na	na	na	na	na	na	na	na	na	na	na	na	0.09	0.25	0.37	na	na	na	hypothetical protein
ETH_00019040	4	0.37	0.56	1.55	0.36	0.47	1.51	0.32	NaN	NaN	NaN	na	na	na	0.05	0.09	0.49	0.47	1.46	0.32	hypothetical protein
ETH_00006975	3	0.37	0.68	3.27	0.21	na	na	na	0.66	2.93	0.22	NaN	NaN	NaN	0.08	0.11	0.68	NaN	NaN	NaN	hypothetical protein
ETH_00025485	5	0.37	0.71	3.07	0.23	0.71	1.34	0.53	0.54	2.6	0.21	na	na	na	0.07	0.14	0.49	0.7	1.78	0.39	hypothetical protein
ETH_00039995	3	0.37	0.23	1.36	0.17	1.05	1.79	0.59	NaN	NaN	NaN	0.95	2.69	0.35	na	na	na	NaN	NaN	NaN	hypothetical protein, conserved
ETH_00025865	6	0.37	0.49	1.52	0.32	0.47	1.46	0.32	0.48	1.48	0.33	0.45	1.63	0.28	0.06	0.09	0.68	0.44	1.54	0.29	hypothetical protein, conserved
ETH_00006925	6	0.37	0.53	1.5	0.35	0.62	1.59	0.39	0.51	1.52	0.34	0.53	1.36	0.39	0.04	0.11	0.34	0.54	1.29	0.42	hypothetical protein, conserved
ETH_00031745	4	0.37	1.08	1.47	0.74	na	na	na	na	na	na	0.26	1.66	0.16	0.05	0.13	0.38	0.4	2.01	0.2	hypothetical protein
ETH_00036375	2	0.37	na	na	na	0.94	1.62	0.58	0.35	2.24	0.16	na	na	na	na	na	na	NaN	NaN	NaN	hypothetical protein, conserved
ETH_00000140	2	0.37	na	na	na	NaN	NaN	NaN	na	na	na	0.62	2.47	0.25	0.04	0.08	0.49	na	na	na	hypothetical protein
ETH_00043555	5	0.37	0.49	1.56	0.31	0.61	1.59	0.38	NaN	NaN	NaN	0.61	1.88	0.32	0.2	0.33	0.58	0.44	1.83	0.24	hypothetical protein
ETH_00025080	1	0.37	na	na	na	na	na	na	na	na	na	na	na	na	0.1	0.28	0.37	na	na	na	hypothetical protein
ETH_00003175	4	0.37	na	na	na	0.4	2.9	0.14	0.46	2.13	0.22	1.16	1.39	0.84	0.04	0.15	0.28	na	na	na	hypothetical protein
ETH_00026255	1	0.37	na	na	na	na	na	na	na	na	na	na	na	na	0.07	0.19	0.37	na	na	na	hypothetical protein
ETH_00004705	4	0.37	0.61	2.15	0.29	na	na	na	0.34	1.6	0.21	na	na	na	0.05	0.11	0.46	0.67	1.29	0.52	hypothetical protein
ETH_00006745	3	0.37	0.51	1.3	0.39	0.53	1.28	0.41	0.54	1.77	0.3	na	na	na	na	na	na	NaN	NaN	NaN	hypothetical protein
ETH_00015290	1	0.37	na	na	na	na	na	na	na	na	na	na	na	na	0.02	0.06	0.37	na	na	na	zinc finger (CCCH type) protein, putative
ETH_00004955	4	0.37	na	na	na	0.58	2.28	0.25	na	na	na	0.64	1.8	0.36	0.05	0.1	0.48	0.61	1.62	0.38	hypothetical protein
ETH_00006345	2	0.37	0.58	1.33	0.44	NaN	NaN	NaN	NaN	NaN	NaN	na	na	na	0.04	0.13	0.29	na	na	na	hypothetical protein, conserved
ETH_00021895	1	0.37	NaN	NaN	NaN	na	na	na	NaN	NaN	NaN	na	na	na	0.03	0.09	0.37	na	na	na	nucleolar phosphoprotein p130, putative
ETH_00007180	2	0.37	na	na	na	na	na	na	na	na	na	0.47	4.98	0.09	0.12	0.18	0.64	na	na	na	hypothetical protein
ETH_00014060	3	0.37	NaN	NaN	NaN	NaN	NaN	NaN	0.75	2.46	0.3	0.47	2.44	0.19	0.06	0.09	0.6	NaN	NaN	NaN	hypothetical protein
ETH_00032605	3	0.37	0.52	1.12	0.47	NaN	NaN	NaN	0.7	1.71	0.41	na	na	na	na	na	na	0.78	3.53	0.22	hypothetical protein
ETH_00042780	2	0.37	0.62	2.39	0.26	NaN	NaN	NaN	NaN	NaN	NaN	0.92	1.94	0.47	na	na	na	na	na	na	hypothetical protein
ETH_00043785	4	0.37	0.99	1.19	0.83	0.22	0.88	0.26	NaN	NaN	NaN	0.19	0.68	0.28	0.01	0.12	0.09	na	na	na	hypothetical protein
ETH_00008275	1	0.37	na	na	na	na	na	na	na	na	na	na	na	na	0.11	0.31	0.37	na	na	na	hypothetical protein, conserved
ETH_00028260	2	0.37	na	na	na	0.4	2.22	0.18	NaN	NaN	NaN	NaN	NaN	NaN	0.11	0.2	0.55	NaN	NaN	NaN	hypothetical protein
ETH_00016460	1	0.37	na	na	na	na	na	na	na	na	na	na	na	na	0.06	0.16	0.37	na	na	na	hypothetical protein
ETH_00002440	3	0.36	na	na	na	0.52	1.58	0.33	na	na	na	NaN	NaN	NaN	0.03	0.08	0.38	0.63	1.61	0.39	hypothetical protein
ETH_00028180	3	0.36	NaN	NaN	NaN	1.04	2.07	0.5	0.37	1.85	0.2	na	na	na	0.05	0.12	0.39	na	na	na	hypothetical protein, conserved
ETH_00003750	1	0.36	na	na	na	na	na	na	NaN	NaN	NaN	na	na	na	0.05	0.15	0.36	na	na	na	peptide chain release factor 1, putative
ETH_00042465	5	0.36	0.85	2.48	0.34	0.55	2.44	0.23	0.43	2.12	0.2	NaN	NaN	NaN	0.03	0.15	0.18	0.98	1.12	0.87	na
ETH_00023760	1	0.36	NaN	NaN	NaN	na	na	na	na	na	na	na	na	na	0.03	0.07	0.36	na	na	na	hypothetical protein
ETH_00023600	1	0.36	na	na	na	na	na	na	na	na	na	na	na	na	0.04	0.1	0.36	na	na	na	hypothetical protein
ETH_00004125	1	0.36	NaN	NaN	NaN	NaN	NaN	NaN	na	na	na	NaN	NaN	NaN	0.06	0.17	0.36	na	na	na	HIT zinc finger domain-containing protein, putative
ETH_00002315	3	0.36	na	na	na	0.26	1.48	0.18	NaN	NaN	NaN	0.36	1.82	0.2	0.09	0.13	0.72	na	na	na	U3 small nucleolar ribonucleoprotein complex-associated protein, putative
ETH_00024045	2	0.36	na	na	na	0.32	1.27	0.25	na	na	na	na	na	na	0.02	0.04	0.47	na	na	na	hypothetical protein
ETH_00028900	5	0.36	0.54	1.32	0.41	0.63	1.56	0.41	NaN	NaN	NaN	0.36	1.13	0.32	0.05	0.11	0.43	1.19	4.68	0.25	hypothetical protein
ETH_00020640	5	0.36	0.34	2.05	0.17	na	na	na	0.48	1.62	0.3	0.6	1.62	0.37	0.06	0.1	0.59	0.45	1.14	0.39	hypothetical protein
ETH_00042935	1	0.36	na	na	na	na	na	na	na	na	na	na	na	na	0.08	0.22	0.36	na	na	na	hypothetical protein
ETH_00017760	1	0.36	na	na	na	na	na	na	na	na	na	na	na	na	0.14	0.38	0.36	na	na	na	hypothetical protein, conserved
ETH_00003425	1	0.36	na	na	na	na	na	na	NaN	NaN	NaN	na	na	na	0.08	0.23	0.36	na	na	na	hypothetical protein, conserved
ETH_00012360	1	0.36	na	na	na	na	na	na	na	na	na	na	na	na	0.05	0.15	0.36	na	na	na	hypothetical protein
ETH_00023515	1	0.36	na	na	na	na	na	na	na	na	na	na	na	na	0.04	0.11	0.36	na	na	na	hypothetical protein
ETH_00009070	2	0.36	0.36	2.05	0.18	na	na	na	na	na	na	na	na	na	0.06	0.12	0.55	na	na	na	hypothetical protein
ETH_00012375	1	0.36	na	na	na	na	na	na	na	na	na	na	na	na	0.05	0.13	0.36	na	na	na	hypothetical protein
ETH_00033575	2	0.36	na	na	na	na	na	na	na	na	na	0.42	2.27	0.19	0.28	0.53	0.54	na	na	na	hypothetical protein
ETH_00028370	2	0.36	na	na	na	0.7	2.45	0.29	na	na	na	NaN	NaN	NaN	na	na	na	0.63	1.45	0.44	hypothetical protein
ETH_00008170	1	0.36	na	na	na	na	na	na	na	na	na	na	na	na	0.06	0.17	0.36	na	na	na	hypothetical protein, conserved
ETH_00020840	5	0.36	na	na	na	0.92	1.91	0.48	0.81	2.02	0.4	0.88	2.83	0.31	0.1	0.4	0.26	0.8	2.28	0.35	hypothetical protein
ETH_00032670	3	0.36	na	na	na	0.19	1.33	0.14	0.42	1.77	0.24	na	na	na	0.26	0.37	0.7	na	na	na	hypothetical protein
ETH_00039370	4	0.36	0.62	2.79	0.22	0.69	2.26	0.3	NaN	NaN	NaN	0.81	2.46	0.33	0.63	1.07	0.59	na	na	na	hypothetical protein, conserved
ETH_00012405	6	0.36	0.54	1.58	0.34	0.55	3.08	0.18	0.6	1.94	0.31	0.55	1.9	0.29	0.08	0.1	0.82	0.48	2.06	0.23	hypothetical protein
ETH_00005085	5	0.36	0.58	1.97	0.29	0.87	1.75	0.5	0.9	2.26	0.4	0.86	3.79	0.23	0.06	0.16	0.39	NaN	NaN	NaN	hypothetical protein
ETH_00009810	5	0.36	1.07	1.72	0.62	0.53	1.72	0.31	0.51	2.39	0.21	0.78	1.88	0.41	0.1	0.4	0.25	na	na	na	hypothetical protein
ETH_00035000	2	0.36	na	na	na	na	na	na	0.41	1.33	0.31	0.45	1.08	0.41	na	na	na	NaN	NaN	NaN	sag
ETH_00008715	1	0.36	na	na	na	na	na	na	na	na	na	na	na	na	0.14	0.4	0.36	na	na	na	sag
ETH_00035825	3	0.36	NaN	NaN	NaN	0.35	1.59	0.22	NaN	NaN	NaN	0.98	2.81	0.35	0.8	1.55	0.52	NaN	NaN	NaN	hypothetical protein
ETH_00005795	5	0.36	0.4	0.98	0.4	0.46	1.16	0.4	0.32	1.27	0.25	na	na	na	0.03	0.1	0.35	0.42	1.04	0.41	hypothetical protein
ETH_00023075	1	0.36	na	na	na	na	na	na	na	na	na	na	na	na	0.04	0.12	0.36	na	na	na	hypothetical protein
ETH_00001400	5	0.36	0.58	1.57	0.37	0.54	2.69	0.2	0.62	1.47	0.42	na	na	na	0.05	0.1	0.5	0.56	1.76	0.32	hypothetical protein
ETH_00003480	1	0.36	na	na	na	na	na	na	na	na	na	na	na	na	0.02	0.04	0.36	na	na	na	hypothetical protein
ETH_00026695	4	0.36	NaN	NaN	NaN	na	na	na	0.77	2.55	0.3	0.53	1.82	0.29	0.07	0.11	0.61	0.69	2.88	0.24	hypothetical protein
ETH_00034215	6	0.36	0.44	1.24	0.36	0.59	1.59	0.37	0.48	2.72	0.18	0.49	1.97	0.25	0.08	0.23	0.37	0.8	1.27	0.63	hypothetical protein
ETH_00001945	2	0.36	NaN	NaN	NaN	0.08	3.09	0.02	0.86	1.25	0.69	na	na	na	na	na	na	na	na	na	hypothetical protein
ETH_00013210	6	0.36	0.68	1.61	0.42	0.58	1.34	0.43	0.55	1.59	0.34	0.51	2.2	0.23	0.08	0.15	0.5	0.58	2.57	0.22	hypothetical protein
ETH_00010905	5	0.36	0.56	1.53	0.37	0.56	1.77	0.31	0.59	1.96	0.3	na	na	na	0.05	0.09	0.49	0.56	1.74	0.32	hypothetical protein
ETH_00012330	4	0.36	na	na	na	0.48	1.22	0.39	na	na	na	0.43	1.2	0.36	0.03	0.11	0.29	0.51	1.26	0.4	hypothetical protein, conserved
ETH_00001670	5	0.36	na	na	na	0.64	1.53	0.42	0.45	1.83	0.25	0.55	1.18	0.47	0.1	0.17	0.58	0.47	5.7	0.08	hypothetical protein
ETH_00020015	6	0.36	0.58	1.69	0.35	0.52	1.64	0.32	0.52	1.64	0.32	0.55	1.39	0.39	0.05	0.12	0.4	0.53	1.4	0.38	hypothetical protein
ETH_00026795	1	0.36	NaN	NaN	NaN	na	na	na	na	na	na	na	na	na	0.15	0.41	0.36	na	na	na	adenosine kinase, putative
ETH_00033155	6	0.36	0.43	1.35	0.32	0.39	1.66	0.24	0.59	1.09	0.54	0.46	1.4	0.33	0.07	0.17	0.39	0.57	1.7	0.34	hypothetical protein
ETH_00022305	2	0.36	0.43	1.57	0.27	na	na	na	na	na	na	na	na	na	0.12	0.27	0.44	na	na	na	sag
ETH_00042885	3	0.36	0.19	0.95	0.2	0.15	1.69	0.09	na	na	na	1.03	1.3	0.79	na	na	na	na	na	na	hypothetical protein
ETH_00024240	5	0.36	0.42	1.76	0.24	0.83	1.99	0.42	na	na	na	0.84	1.64	0.51	0.11	0.25	0.44	0.39	2.12	0.19	hypothetical protein
ETH_00026785	1	0.36	na	na	na	na	na	na	na	na	na	na	na	na	0.06	0.16	0.36	na	na	na	hypothetical protein
ETH_00041395	5	0.36	0.34	1.64	0.2	0.31	1.42	0.22	0.88	2.06	0.43	na	na	na	0.9	1.31	0.69	0.35	1.39	0.25	na
ETH_00017375	1	0.36	na	na	na	na	na	na	na	na	na	na	na	na	0.02	0.06	0.36	na	na	na	hypothetical protein
ETH_00017255	4	0.36	0.58	1.88	0.31	0.48	1.25	0.38	na	na	na	1.01	2.55	0.4	na	na	na	0.73	2.14	0.34	hypothetical protein, conserved
ETH_00025335	5	0.36	0.36	1.09	0.33	0.34	0.94	0.37	NaN	NaN	NaN	0.38	1.81	0.21	0.03	0.04	0.68	0.41	2.06	0.2	hypothetical protein
ETH_00014810	1	0.36	na	na	na	na	na	na	na	na	na	na	na	na	0.04	0.12	0.36	na	na	na	hypothetical protein
ETH_00019270	1	0.36	NaN	NaN	NaN	na	na	na	NaN	NaN	NaN	0.42	1.17	0.36	na	na	na	NaN	NaN	NaN	hypothetical protein, conserved
ETH_00000945	2	0.36	na	na	na	0.25	1.9	0.13	na	na	na	NaN	NaN	NaN	0.01	0.01	0.58	na	na	na	hypothetical protein
ETH_00017470	1	0.36	0.42	1.18	0.36	na	na	na	na	na	na	na	na	na	na	na	na	na	na	na	hypothetical protein
ETH_00032440	1	0.36	NaN	NaN	NaN	NaN	NaN	NaN	NaN	NaN	NaN	NaN	NaN	NaN	0.07	0.2	0.36	na	na	na	zinc finger (CCCH type) protein, putative
ETH_00043720	4	0.36	0.5	1.85	0.27	NaN	NaN	NaN	na	na	na	0.7	1.56	0.45	0.25	0.61	0.4	0.95	3.21	0.3	hypothetical protein
ETH_00006935	6	0.36	0.69	1.77	0.39	0.61	1.7	0.36	0.72	2.29	0.31	0.64	1.9	0.33	0.07	0.17	0.39	0.57	1.68	0.34	hypothetical protein
ETH_00008595	6	0.36	0.49	1.23	0.4	0.54	1.45	0.37	0.42	1.69	0.25	0.47	1.05	0.44	0.06	0.16	0.35	0.5	1.58	0.32	hypothetical protein
ETH_00010420	4	0.36	0.35	2.12	0.17	0.83	2.06	0.4	na	na	na	0.7	1.23	0.57	na	na	na	0.66	2.33	0.28	hypothetical protein
ETH_00020870	4	0.36	na	na	na	0.56	1.34	0.42	0.44	1.23	0.36	0.39	0.89	0.44	0.03	0.16	0.2	na	na	na	hypothetical protein
ETH_00043560	5	0.36	0.47	1.8	0.26	NaN	NaN	NaN	0.75	1.72	0.43	0.71	1.42	0.5	0.06	0.22	0.26	0.49	1.54	0.32	hypothetical protein
ETH_00040780	1	0.36	NaN	NaN	NaN	NaN	NaN	NaN	NaN	NaN	NaN	na	na	na	0.09	0.24	0.36	na	na	na	hypothetical protein
ETH_00034875	4	0.36	0.56	1.26	0.45	0.49	1.41	0.35	0.48	1.44	0.33	na	na	na	0.02	0.08	0.3	na	na	na	hypothetical protein
ETH_00015415	4	0.36	0.34	1.08	0.31	na	na	na	0.47	1.65	0.28	0.89	2.22	0.4	0.41	0.97	0.42	na	na	na	hypothetical protein, conserved
ETH_00012250	6	0.35	0.44	1.31	0.34	0.49	1.41	0.35	0.48	1.51	0.32	0.48	1.47	0.33	0.04	0.1	0.47	0.44	1.34	0.33	hypothetical protein
ETH_00021855	4	0.35	0.49	1.36	0.36	0.37	1.22	0.3	0.56	1.34	0.42	0.41	1.2	0.34	na	na	na	na	na	na	hypothetical protein
ETH_00016155	1	0.35	na	na	na	na	na	na	na	na	na	na	na	na	0.06	0.16	0.35	na	na	na	hypothetical protein
ETH_00032350	3	0.35	NaN	NaN	NaN	0.45	1.65	0.27	na	na	na	na	na	na	0.18	0.41	0.43	0.57	1.59	0.36	hypothetical protein, conserved
ETH_00020070	1	0.35	na	na	na	na	na	na	na	na	na	na	na	na	0.09	0.27	0.35	na	na	na	hypothetical protein
ETH_00004530	2	0.35	na	na	na	na	na	na	NaN	NaN	NaN	0.78	1.89	0.42	0.05	0.17	0.29	na	na	na	hypothetical protein
ETH_00014650	1	0.35	NaN	NaN	NaN	na	na	na	na	na	na	na	na	na	0.16	0.45	0.35	NaN	NaN	NaN	hypothetical protein, conserved
ETH_00025975	5	0.35	0.87	2.68	0.32	0.55	1.11	0.5	NaN	NaN	NaN	0.43	1.53	0.28	0.04	0.13	0.3	0.84	2.26	0.37	hypothetical protein
ETH_00011050	1	0.35	NaN	NaN	NaN	NaN	NaN	NaN	NaN	NaN	NaN	na	na	na	0.05	0.13	0.35	NaN	NaN	NaN	subtilisin-like protease TgSUB2, putative
ETH_00005110	3	0.35	NaN	NaN	NaN	NaN	NaN	NaN	0.52	2.85	0.18	na	na	na	0.06	0.13	0.44	0.53	1.2	0.44	hypothetical protein
ETH_00031150	3	0.35	0.26	1.99	0.13	NaN	NaN	NaN	NaN	NaN	NaN	0.98	1.52	0.65	0.02	0.06	0.28	na	na	na	hypothetical protein, conserved
ETH_00035015	1	0.35	na	na	na	na	na	na	na	na	na	na	na	na	0.06	0.17	0.35	na	na	na	sag
ETH_00025550	1	0.35	NaN	NaN	NaN	NaN	NaN	NaN	na	na	na	NaN	NaN	NaN	0.06	0.16	0.35	na	na	na	MAC/Perforin domain containing protein, related
ETH_00015695	5	0.35	0.33	1.16	0.28	0.39	1.04	0.37	0.35	1.26	0.28	na	na	na	0.06	0.1	0.58	0.38	1.46	0.26	hypothetical protein
ETH_00029685	6	0.35	0.47	1.38	0.34	0.39	1.17	0.33	0.57	1.64	0.35	0.53	2.14	0.25	0.05	0.11	0.43	0.58	1.38	0.42	hypothetical protein
ETH_00007355	5	0.35	0.64	1.45	0.44	0.73	2.22	0.33	NaN	NaN	NaN	0.67	2.9	0.23	0.04	0.11	0.38	0.62	1.59	0.39	hypothetical protein
ETH_00025340	3	0.35	0.33	1.28	0.26	na	na	na	0.72	1.65	0.44	na	na	na	0.04	0.11	0.36	na	na	na	hypothetical protein, conserved
ETH_00042615	2	0.35	NaN	NaN	NaN	na	na	na	0.3	1.48	0.2	NaN	NaN	NaN	0.95	1.88	0.51	NaN	NaN	NaN	hypothetical protein
ETH_00010005	4	0.35	0.9	2.69	0.33	0.79	3.19	0.25	NaN	NaN	NaN	NaN	NaN	NaN	0.05	0.13	0.38	0.84	1.88	0.45	hypothetical protein
ETH_00004540	5	0.35	0.49	1.58	0.31	0.49	1.63	0.3	na	na	na	0.39	1.46	0.27	0.08	0.16	0.5	0.53	1.38	0.38	hypothetical protein
ETH_00040345	2	0.35	na	na	na	na	na	na	0.36	1.53	0.23	NaN	NaN	NaN	na	na	na	0.45	0.96	0.47	hypothetical protein
ETH_00030680	3	0.35	na	na	na	0.28	2.33	0.12	NaN	NaN	NaN	NaN	NaN	NaN	0.1	0.16	0.61	0.43	1.32	0.32	AAA family ATPase, putative
ETH_00027655	3	0.35	na	na	na	0.6	1.55	0.39	na	na	na	0.72	2.48	0.29	na	na	na	0.59	1.56	0.38	Proteophosphoglycan ppg1, related
ETH_00018445	2	0.35	na	na	na	na	na	na	na	na	na	0.6	2.77	0.22	0.16	0.33	0.49	na	na	na	hypothetical protein
ETH_00008620	1	0.35	na	na	na	na	na	na	na	na	na	na	na	na	0.04	0.11	0.35	na	na	na	leucine rich repeat protein, putative
ETH_00030930	5	0.35	0.33	1.64	0.2	0.94	1.15	0.82	0.35	1.02	0.34	0.38	1.3	0.29	0.02	0.21	0.11	NaN	NaN	NaN	hypothetical protein
ETH_00033940	1	0.35	na	na	na	na	na	na	na	na	na	na	na	na	0.06	0.17	0.35	na	na	na	na
ETH_00017030	1	0.35	na	na	na	na	na	na	na	na	na	na	na	na	0.06	0.16	0.35	na	na	na	hypothetical protein
ETH_00042390	4	0.35	0.46	1.55	0.3	0.36	1.23	0.29	na	na	na	0.97	2.03	0.48	0.04	0.11	0.33	na	na	na	hypothetical protein
ETH_00023880	1	0.35	0.48	1.36	0.35	na	na	na	na	na	na	NaN	NaN	NaN	na	na	na	na	na	na	hypothetical protein
ETH_00000515	3	0.35	0.05	1.23	0.04	1.01	1.05	0.97	NaN	NaN	NaN	0.07	1.81	0.04	na	na	na	na	na	na	phosphatidylinositol N-acetylglucosaminyltransferase subunit, putative
ETH_00040715	2	0.35	0.46	1.78	0.26	na	na	na	na	na	na	na	na	na	0.09	0.19	0.44	na	na	na	hypothetical protein
ETH_00027850	1	0.35	na	na	na	na	na	na	na	na	na	na	na	na	0.03	0.08	0.35	na	na	na	hypothetical protein
ETH_00010475	6	0.35	0.41	1.17	0.35	0.72	2.19	0.33	0.54	1.4	0.38	0.51	1.76	0.29	0.04	0.1	0.4	0.45	1.29	0.35	hypothetical protein
ETH_00003445	1	0.35	na	na	na	na	na	na	na	na	na	na	na	na	0.04	0.1	0.35	na	na	na	hypothetical protein
ETH_00010835	1	0.35	na	na	na	na	na	na	na	na	na	na	na	na	0.11	0.3	0.35	na	na	na	sag
ETH_00041550	5	0.35	0.33	1.18	0.28	na	na	na	0.35	3.36	0.1	0.35	0.79	0.44	0.03	0.06	0.62	0.38	1.27	0.3	na
ETH_00025460	1	0.35	na	na	na	na	na	na	na	na	na	na	na	na	0.1	0.27	0.35	na	na	na	protein kinase (incomplete catalytic triad), putative
ETH_00017930	5	0.35	NaN	NaN	NaN	0.58	1.74	0.33	0.6	2.02	0.3	0.55	1.4	0.39	0.05	0.19	0.26	0.87	1.83	0.47	hypothetical protein
ETH_00016275	1	0.35	na	na	na	na	na	na	na	na	na	na	na	na	0.07	0.2	0.35	na	na	na	hypothetical protein
ETH_00036505	5	0.35	NaN	NaN	NaN	0.74	2.08	0.36	0.87	2.97	0.29	0.62	1.67	0.37	0.18	0.42	0.43	0.98	3.33	0.29	mRNA decapping protein, putative
ETH_00039660	4	0.35	0.59	1.4	0.42	0.5	1.17	0.43	0.57	1.66	0.34	na	na	na	na	na	na	0.49	2.45	0.2	hypothetical protein
ETH_00015145	2	0.35	0.42	1.63	0.26	na	na	na	na	na	na	na	na	na	0.14	0.31	0.44	na	na	na	hypothetical protein, conserved
ETH_00017970	6	0.35	0.6	1.85	0.32	0.55	1.23	0.44	0.55	1.56	0.36	0.67	1.54	0.44	0.04	0.17	0.24	0.56	1.91	0.3	hypothetical protein
ETH_00025010	4	0.35	na	na	na	0.53	1.81	0.29	na	na	na	0.52	2.1	0.25	0.07	0.15	0.47	0.5	1.29	0.38	hypothetical protein
ETH_00002950	1	0.35	na	na	na	na	na	na	na	na	na	na	na	na	0.08	0.23	0.35	na	na	na	hypothetical protein
ETH_00008315	1	0.35	NaN	NaN	NaN	na	na	na	na	na	na	na	na	na	0.09	0.26	0.35	na	na	na	hypothetical protein, conserved
ETH_00022380	6	0.35	0.47	1.49	0.31	0.4	1.27	0.32	0.48	1.66	0.29	0.42	1.13	0.37	0.04	0.11	0.39	0.55	1.36	0.41	hypothetical protein
ETH_00039085	2	0.35	0.31	1.48	0.21	na	na	na	na	na	na	na	na	na	0.04	0.08	0.49	na	na	na	hypothetical protein
ETH_00043280	3	0.35	NaN	NaN	NaN	0.34	2.28	0.15	NaN	NaN	NaN	na	na	na	0.04	0.13	0.3	1.19	1.98	0.6	arginine N-methyltransferase, putative
ETH_00003575	6	0.35	0.63	1.53	0.41	0.54	2.94	0.18	0.59	2.68	0.22	0.59	1.37	0.43	0.07	0.14	0.52	0.51	1.6	0.32	hypothetical protein
ETH_00003075	4	0.35	na	na	na	0.7	0.94	0.74	0.12	1.05	0.12	0.29	1.06	0.27	na	na	na	0.29	1.1	0.26	hypothetical protein
ETH_00040875	3	0.35	NaN	NaN	NaN	0.61	1.99	0.31	0.62	2.26	0.27	0.92	2	0.46	na	na	na	NaN	NaN	NaN	hypothetical protein
ETH_00026465	2	0.35	NaN	NaN	NaN	0.76	2.82	0.27	na	na	na	NaN	NaN	NaN	0.05	0.13	0.42	NaN	NaN	NaN	hypothetical protein
ETH_00002855	2	0.35	na	na	na	na	na	na	na	na	na	NaN	NaN	NaN	0.25	0.39	0.65	0.12	2.85	0.04	hypothetical protein, conserved
ETH_00023520	5	0.35	na	na	na	0.52	1.17	0.44	0.45	1.21	0.37	0.44	1.46	0.3	0.03	0.11	0.32	0.5	1.68	0.3	hypothetical protein
ETH_00020605	6	0.35	0.42	1.33	0.32	0.5	1.46	0.34	0.43	1.54	0.28	0.68	2.5	0.27	0.05	0.09	0.55	0.45	1.42	0.32	hypothetical protein, conserved
ETH_00007130	1	0.35	NaN	NaN	NaN	NaN	NaN	NaN	na	na	na	na	na	na	0.02	0.07	0.35	na	na	na	hypothetical protein, conserved
ETH_00034965	1	0.35	na	na	na	na	na	na	na	na	na	na	na	na	0.08	0.22	0.35	na	na	na	sag
ETH_00022760	4	0.35	0.67	2.1	0.32	na	na	na	NaN	NaN	NaN	0.85	2.19	0.39	0.05	0.1	0.45	0.85	3.72	0.23	hypothetical protein, conserved
ETH_00031110	3	0.35	0.13	1.27	0.1	0.3	1.16	0.26	NaN	NaN	NaN	na	na	na	0.28	0.42	0.68	NaN	NaN	NaN	DNA replication licensing factor, putative
ETH_00030790	6	0.35	0.59	1.83	0.32	0.57	1.82	0.31	0.56	1.71	0.33	0.55	1.79	0.31	0.06	0.13	0.42	0.68	1.75	0.39	hypothetical protein
ETH_00036985	5	0.35	0.38	1	0.38	0.53	1.7	0.31	0.44	1.65	0.27	na	na	na	0.19	0.46	0.42	0.45	1.27	0.35	na
ETH_00032260	1	0.35	na	na	na	na	na	na	na	na	na	na	na	na	0.07	0.19	0.35	na	na	na	glutamate 5-kinase, putative
ETH_00004830	6	0.35	0.33	0.92	0.36	0.34	1.01	0.33	0.36	2.2	0.16	0.37	1.23	0.3	0.05	0.08	0.69	0.35	1.54	0.23	hypothetical protein
ETH_00023375	2	0.35	na	na	na	na	na	na	0.61	2.42	0.25	na	na	na	0.08	0.19	0.44	na	na	na	sag
ETH_00020365	1	0.35	na	na	na	na	na	na	na	na	na	na	na	na	0.05	0.14	0.35	na	na	na	hypothetical protein, conserved
ETH_00040755	1	0.35	na	na	na	na	na	na	na	na	na	na	na	na	0.05	0.14	0.35	na	na	na	hypothetical protein
ETH_00036555	2	0.35	NaN	NaN	NaN	NaN	NaN	NaN	na	na	na	0.82	1.65	0.5	0.03	0.17	0.19	na	na	na	hypothetical protein
ETH_00036450	4	0.35	0.27	2.04	0.13	0.59	2.51	0.24	NaN	NaN	NaN	NaN	NaN	NaN	0.04	0.13	0.34	0.99	1.48	0.67	kelch motif domain-containing protein, putative
ETH_00012705	6	0.34	0.41	1.39	0.29	0.39	1.27	0.3	0.49	1.72	0.29	0.34	1.53	0.22	0.07	0.09	0.77	0.38	1.92	0.2	hypothetical protein, conserved
ETH_00035100	6	0.34	0.64	2.18	0.3	0.43	2.1	0.21	0.6	1.4	0.43	0.59	1.72	0.34	0.05	0.1	0.49	0.73	2.35	0.31	hypothetical protein
ETH_00001215	2	0.34	0.89	2.14	0.42	na	na	na	na	na	na	0.72	2.66	0.27	na	na	na	NaN	NaN	NaN	hypothetical protein
ETH_00015970	1	0.34	na	na	na	na	na	na	na	na	na	na	na	na	0.06	0.18	0.34	na	na	na	hypothetical protein
ETH_00042560	4	0.34	0.58	1.54	0.38	0.71	1.45	0.49	NaN	NaN	NaN	0.41	1.55	0.27	na	na	na	0.33	1.33	0.25	hypothetical protein, conserved
ETH_00015795	4	0.34	0.42	2.35	0.18	0.59	1.53	0.39	NaN	NaN	NaN	0.9	1.9	0.47	0.08	0.23	0.34	na	na	na	hypothetical protein, conserved
ETH_00024445	1	0.34	NaN	NaN	NaN	NaN	NaN	NaN	na	na	na	na	na	na	0.16	0.46	0.34	na	na	na	26S proteasome non-ATPase regulatory subunit 4, putative
ETH_00015765	4	0.34	0.67	1.89	0.35	NaN	NaN	NaN	0.62	2.1	0.3	na	na	na	0.05	0.12	0.4	0.67	2.08	0.32	hypothetical protein
ETH_00042035	1	0.34	NaN	NaN	NaN	NaN	NaN	NaN	NaN	NaN	NaN	NaN	NaN	NaN	0.12	0.34	0.34	na	na	na	hypothetical protein, conserved
ETH_00020630	6	0.34	0.51	1.37	0.37	0.45	1.26	0.35	0.42	1.48	0.28	0.51	2.55	0.2	0.05	0.08	0.58	0.42	1.56	0.27	hypothetical protein
ETH_00023310	1	0.34	na	na	na	na	na	na	na	na	na	na	na	na	0.04	0.12	0.34	na	na	na	hypothetical protein
ETH_00015035	4	0.34	NaN	NaN	NaN	0.49	1.17	0.42	na	na	na	0.38	1.24	0.31	0.04	0.15	0.26	0.53	1.35	0.39	hypothetical protein
ETH_00012480	1	0.34	na	na	na	na	na	na	na	na	na	na	na	na	0.06	0.18	0.34	na	na	na	hypothetical protein
ETH_00013825	5	0.34	0.46	1.56	0.3	0.4	1.32	0.3	0.39	1.84	0.21	NaN	NaN	NaN	0.06	0.09	0.7	0.47	2.32	0.2	hypothetical protein
ETH_00006065	6	0.34	0.58	1.54	0.38	0.49	1.34	0.36	0.38	1.95	0.19	0.65	1.51	0.43	0.06	0.21	0.29	0.48	1.2	0.4	DNA polymerase I, putative
ETH_00008570	1	0.34	na	na	na	na	na	na	na	na	na	na	na	na	0.09	0.26	0.34	na	na	na	hypothetical protein
ETH_00023990	1	0.34	na	na	na	na	na	na	na	na	na	na	na	na	0.01	0.04	0.34	na	na	na	hypothetical protein
ETH_00034860	2	0.34	na	na	na	0.48	1.52	0.32	na	na	na	na	na	na	0.06	0.17	0.37	na	na	na	hypothetical protein, conserved
ETH_00042655	5	0.34	0.95	3.05	0.31	0.1	1.19	0.08	0.73	1.95	0.37	0.96	1.39	0.69	0.06	0.24	0.25	na	na	na	na
ETH_00015865	2	0.34	na	na	na	na	na	na	na	na	na	0.86	1.73	0.5	0.02	0.08	0.19	na	na	na	acyl-CoA dehydrogenase, putative
ETH_00018735	3	0.34	0.63	2.52	0.25	na	na	na	NaN	NaN	NaN	0.71	2.11	0.34	0.2	0.45	0.44	NaN	NaN	NaN	hypothetical protein
ETH_00013915	5	0.34	0.67	1.57	0.42	0.66	1.76	0.38	0.62	3.22	0.19	0.68	1.63	0.42	0.05	0.17	0.29	na	na	na	hypothetical protein
ETH_00026025	3	0.34	0.3	1.71	0.18	na	na	na	na	na	na	na	na	na	0.05	0.1	0.53	0.42	1.33	0.32	hypothetical protein
ETH_00020810	1	0.34	NaN	NaN	NaN	na	na	na	na	na	na	na	na	na	0.07	0.21	0.34	na	na	na	hypothetical protein, conserved
ETH_00023930	2	0.34	NaN	NaN	NaN	0.65	2.1	0.31	na	na	na	na	na	na	0.06	0.17	0.37	na	na	na	hypothetical protein
ETH_00039535	4	0.34	0.93	1.98	0.47	0.48	1.58	0.31	0.8	2.09	0.38	0.35	1.72	0.2	na	na	na	na	na	na	histone deacetylase, putative
ETH_00028635	3	0.34	NaN	NaN	NaN	0.59	2.78	0.21	na	na	na	0.61	2.23	0.28	0.26	0.5	0.53	na	na	na	hypothetical protein, conserved
ETH_00021975	1	0.34	na	na	na	na	na	na	na	na	na	na	na	na	0.09	0.27	0.34	na	na	na	hypothetical protein
ETH_00020370	1	0.34	na	na	na	na	na	na	na	na	na	na	na	na	0.03	0.1	0.34	na	na	na	hypothetical protein
ETH_00020750	5	0.34	0.56	1.62	0.35	0.66	1.29	0.51	0.75	2.87	0.26	na	na	na	0.06	0.21	0.31	0.79	2.97	0.27	hypothetical protein
ETH_00039100	6	0.34	0.45	1.6	0.28	0.49	1.79	0.28	0.83	2.2	0.38	0.64	1.88	0.34	0.08	0.21	0.37	0.78	1.98	0.39	hypothetical protein, conserved
ETH_00012390	5	0.34	0.74	2.29	0.32	0.69	2.26	0.3	0.87	1.92	0.45	0.9	2.72	0.33	0.03	0.11	0.29	na	na	na	hypothetical protein
ETH_00026370	3	0.34	na	na	na	0.12	0.82	0.15	NaN	NaN	NaN	0.25	1.57	0.16	0.07	0.1	0.7	NaN	NaN	NaN	hypothetical protein
ETH_00016630	1	0.34	na	na	na	na	na	na	na	na	na	na	na	na	0.03	0.08	0.34	na	na	na	hypothetical protein
ETH_00030915	4	0.34	0.39	2.66	0.15	0.91	1.57	0.58	NaN	NaN	NaN	na	na	na	0.05	0.15	0.31	0.97	3.04	0.32	translation initiation factor IF-2, putative
ETH_00030430	5	0.34	0.4	2.01	0.2	na	na	na	0.72	2.72	0.26	0.74	2.11	0.35	0.09	0.18	0.52	0.54	1.52	0.36	DNA ligase, putative
ETH_00031885	1	0.34	NaN	NaN	NaN	NaN	NaN	NaN	NaN	NaN	NaN	NaN	NaN	NaN	0.07	0.19	0.34	NaN	NaN	NaN	hypothetical protein
ETH_00015065	1	0.34	na	na	na	na	na	na	na	na	na	na	na	na	0.05	0.15	0.34	na	na	na	hypothetical protein
ETH_00028305	4	0.34	0.43	1.78	0.24	0.46	1.38	0.33	0.5	1.76	0.28	na	na	na	0.07	0.15	0.5	na	na	na	hypothetical protein
ETH_00030715	1	0.34	NaN	NaN	NaN	na	na	na	na	na	na	na	na	na	0.08	0.24	0.34	na	na	na	hypothetical protein
ETH_00013100	4	0.34	0.32	1.32	0.24	0.53	1.42	0.37	0.51	2.68	0.19	na	na	na	0.12	0.22	0.55	na	na	na	hypothetical protein, conserved
ETH_00017955	3	0.34	0.78	1.88	0.42	NaN	NaN	NaN	na	na	na	0.73	3.27	0.22	0.16	0.42	0.37	NaN	NaN	NaN	hypothetical protein
ETH_00030920	5	0.34	0.59	1.39	0.43	0.68	1.35	0.5	0.84	3.59	0.23	0.45	1.49	0.3	0.02	0.09	0.22	na	na	na	hypothetical protein
ETH_00019575	1	0.34	na	na	na	na	na	na	na	na	na	na	na	na	0.05	0.13	0.34	na	na	na	hypothetical protein
ETH_00032860	1	0.34	na	na	na	na	na	na	na	na	na	na	na	na	0.03	0.08	0.34	na	na	na	hypothetical protein
ETH_00019580	2	0.34	NaN	NaN	NaN	NaN	NaN	NaN	NaN	NaN	NaN	na	na	na	0.06	0.15	0.39	0.45	1.58	0.29	hypothetical protein
ETH_00001020	1	0.34	na	na	na	na	na	na	na	na	na	NaN	NaN	NaN	0.04	0.12	0.34	na	na	na	hypothetical protein
ETH_00036300	6	0.34	0.26	1.4	0.19	0.79	2.07	0.38	0.29	1.35	0.22	0.52	1.16	0.45	0.09	0.19	0.48	0.28	0.88	0.31	hypothetical protein
ETH_00040315	6	0.34	0.42	1.64	0.25	0.51	1.75	0.29	0.56	1.26	0.44	0.37	1.63	0.23	0.12	0.24	0.49	0.37	1.19	0.32	hypothetical protein
ETH_00043765	6	0.34	0.46	1.87	0.25	0.56	1.49	0.37	0.72	2.32	0.31	0.43	1.17	0.37	0.08	0.19	0.43	0.7	2.44	0.29	hypothetical protein
ETH_00009335	1	0.34	na	na	na	na	na	na	na	na	na	na	na	na	0.06	0.18	0.34	na	na	na	hypothetical protein
ETH_00023485	6	0.34	0.56	1.57	0.36	0.6	1.54	0.39	0.6	1.68	0.36	0.55	1.66	0.33	0.04	0.14	0.27	0.53	1.68	0.32	hypothetical protein, conserved
ETH_00031710	3	0.34	0.33	1.31	0.25	na	na	na	na	na	na	na	na	na	0.09	0.25	0.36	0.45	1.13	0.4	hypothetical protein
ETH_00013690	6	0.34	0.52	2.06	0.25	0.56	1.78	0.32	0.65	1.78	0.37	0.64	2	0.32	0.06	0.15	0.37	0.63	1.59	0.4	hypothetical protein
ETH_00029635	1	0.34	na	na	na	na	na	na	na	na	na	na	na	na	0.04	0.12	0.34	na	na	na	hypothetical protein
ETH_00002715	5	0.34	0.62	2.52	0.25	0.76	2.07	0.37	0.62	2.29	0.27	0.74	1.83	0.41	0.02	0.06	0.39	NaN	NaN	NaN	hypothetical protein
ETH_00017745	2	0.34	0.56	1.75	0.32	na	na	na	na	na	na	na	na	na	0.17	0.49	0.35	na	na	na	hypothetical protein
ETH_00009175	2	0.34	0.61	2.09	0.29	na	na	na	na	na	na	na	na	na	0.09	0.24	0.38	na	na	na	hypothetical protein
ETH_00038255	1	0.34	na	na	na	na	na	na	NaN	NaN	NaN	na	na	na	0.11	0.33	0.34	na	na	na	na
ETH_00029680	5	0.34	0.28	1.11	0.25	0.36	0.82	0.44	na	na	na	0.55	1.56	0.36	0.04	0.11	0.37	0.41	1.54	0.27	hypothetical protein
ETH_00026565	4	0.34	0.42	1.79	0.23	0.42	1.56	0.27	0.42	1.7	0.25	na	na	na	0.05	0.09	0.59	na	na	na	hypothetical protein, conserved
ETH_00024255	1	0.33	na	na	na	na	na	na	na	na	na	na	na	na	0.06	0.17	0.33	na	na	na	hypothetical protein, conserved
ETH_00011265	4	0.33	0.52	1.77	0.3	0.52	1.98	0.26	na	na	na	na	na	na	0.07	0.15	0.46	0.56	1.79	0.32	hypothetical protein
ETH_00039185	5	0.33	0.28	2.83	0.1	0.95	3.39	0.28	0.89	3.21	0.28	0.86	2.2	0.39	na	na	na	1.03	1.65	0.62	hypothetical protein
ETH_00042940	2	0.33	na	na	na	0.71	1.24	0.58	NaN	NaN	NaN	na	na	na	0.01	0.13	0.09	na	na	na	hypothetical protein, conserved
ETH_00003635	1	0.33	na	na	na	na	na	na	na	na	na	na	na	na	0.12	0.37	0.33	na	na	na	hypothetical protein, conserved
ETH_00026165	1	0.33	na	na	na	na	na	na	na	na	na	na	na	na	0.09	0.27	0.33	na	na	na	hypothetical protein
ETH_00007175	1	0.33	na	na	na	na	na	na	na	na	na	na	na	na	0.03	0.08	0.33	na	na	na	hypothetical protein
ETH_00033450	3	0.33	na	na	na	0.26	1.36	0.19	na	na	na	na	na	na	0.02	0.12	0.14	0.87	1.29	0.68	copper-transporting ATPase, putative
ETH_00032690	3	0.33	0.42	1.86	0.23	0.68	1.84	0.37	0.88	2.18	0.41	na	na	na	na	na	na	na	na	na	hypothetical protein
ETH_00021550	3	0.33	0.46	1.92	0.24	NaN	NaN	NaN	na	na	na	0.82	1.7	0.49	0.06	0.2	0.28	na	na	na	hypothetical protein
ETH_00031860	3	0.33	0.39	1.34	0.3	0.33	1.99	0.17	NaN	NaN	NaN	na	na	na	0.05	0.09	0.54	NaN	NaN	NaN	hypothetical protein
ETH_00000275	3	0.33	NaN	NaN	NaN	0.59	0.95	0.61	0.42	1.73	0.24	NaN	NaN	NaN	0.02	0.13	0.14	NaN	NaN	NaN	UDP-N-acetylhexosamine pyrophosphorylase, putative
ETH_00008750	1	0.33	na	na	na	na	na	na	na	na	na	na	na	na	0.03	0.1	0.33	na	na	na	hypothetical protein
ETH_00029010	6	0.33	0.26	1.48	0.17	0.4	1.45	0.27	0.46	1.88	0.25	0.78	1.11	0.7	0.03	0.09	0.34	0.39	1.46	0.26	peptide chain release factor 1, putative
ETH_00026780	1	0.33	na	na	na	na	na	na	na	na	na	na	na	na	0.12	0.36	0.33	na	na	na	hypothetical protein
ETH_00002525	5	0.33	0.59	1.96	0.3	na	na	na	0.7	2.03	0.34	0.5	1.54	0.33	0.09	0.21	0.42	0.53	1.94	0.28	hypothetical protein
ETH_00000510	1	0.33	na	na	na	na	na	na	na	na	na	na	na	na	0.04	0.13	0.33	na	na	na	hypothetical protein
ETH_00003210	1	0.33	na	na	na	na	na	na	na	na	na	na	na	na	0.03	0.09	0.33	na	na	na	hypothetical protein
ETH_00011165	1	0.33	na	na	na	na	na	na	na	na	na	na	na	na	0.08	0.23	0.33	na	na	na	hypothetical protein
ETH_00009670	6	0.33	0.86	2.18	0.39	0.88	2.09	0.42	0.73	3.07	0.24	0.54	2.56	0.21	0.07	0.16	0.45	0.49	1.66	0.29	hypothetical protein
ETH_00038905	3	0.33	NaN	NaN	NaN	0.21	1.27	0.16	0.75	3.04	0.25	NaN	NaN	NaN	na	na	na	0.99	1.68	0.59	na
ETH_00020610	6	0.33	0.53	1.61	0.33	0.51	1.3	0.39	0.57	2.28	0.25	0.58	2.41	0.24	0.05	0.13	0.42	0.53	1.46	0.37	hypothetical protein
ETH_00009140	3	0.33	0.57	1.72	0.33	0.35	1.5	0.23	na	na	na	na	na	na	0.08	0.17	0.44	na	na	na	hypothetical protein, conserved
ETH_00039120	1	0.33	na	na	na	na	na	na	na	na	na	na	na	na	0.04	0.11	0.33	na	na	na	hypothetical protein
ETH_00029580	6	0.33	0.48	1.47	0.33	0.5	1.66	0.3	0.48	1.8	0.27	0.47	1.44	0.33	0.04	0.09	0.42	0.56	1.6	0.35	hypothetical protein
ETH_00035010	2	0.33	0.48	1.25	0.38	0.42	1.49	0.28	na	na	na	na	na	na	na	na	na	na	na	na	sag
ETH_00026115	3	0.33	0.51	1.52	0.33	na	na	na	NaN	NaN	NaN	0.39	1.28	0.31	0.05	0.14	0.35	na	na	na	hypothetical protein, conserved
ETH_00043710	4	0.33	0.69	2.19	0.32	0.63	2.18	0.29	0.77	2.79	0.27	NaN	NaN	NaN	0.15	0.33	0.45	na	na	na	hypothetical protein
ETH_00020055	5	0.33	NaN	NaN	NaN	0.63	1.66	0.38	0.62	2.16	0.29	0.56	1.61	0.35	0.04	0.11	0.4	0.64	2.58	0.25	hypothetical protein
ETH_00036600	3	0.33	0.36	1.76	0.21	na	na	na	na	na	na	1.09	2.19	0.5	0.07	0.23	0.29	na	na	na	hypothetical protein
ETH_00022020	6	0.33	0.4	1.19	0.34	0.39	1.21	0.32	0.39	1.17	0.34	0.37	1.17	0.32	0.02	0.06	0.33	0.38	1.1	0.35	hypothetical protein
ETH_00027160	2	0.33	na	na	na	na	na	na	na	na	na	0.34	1.5	0.23	0.06	0.14	0.44	na	na	na	hypothetical protein, conserved
ETH_00040175	6	0.33	0.43	1.78	0.24	0.36	1.33	0.27	0.83	1.75	0.47	0.35	1.01	0.35	0.07	0.15	0.47	0.47	2.46	0.19	hypothetical protein
ETH_00011485	5	0.33	0.18	0.89	0.2	na	na	na	0.31	1.52	0.2	1.08	1.94	0.55	0.06	0.11	0.59	0.19	1.73	0.11	hypothetical protein
ETH_00016330	5	0.33	0.44	1.26	0.35	na	na	na	0.45	1.3	0.35	0.43	2.04	0.21	0.08	0.15	0.53	0.54	2.52	0.22	hypothetical protein
ETH_00002770	4	0.33	0.48	1.38	0.34	0.6	1.2	0.51	0.65	2.25	0.29	na	na	na	0.02	0.14	0.18	na	na	na	hypothetical protein
ETH_00017805	6	0.33	0.61	2.12	0.29	0.68	1.96	0.35	0.58	2.07	0.28	0.6	1.65	0.36	0.04	0.15	0.27	0.69	1.6	0.43	hypothetical protein
ETH_00010100	2	0.33	na	na	na	0.46	2.93	0.16	na	na	na	NaN	NaN	NaN	0.05	0.11	0.5	na	na	na	leucine rich repeat protein, putative
ETH_00017215	2	0.33	0.32	1.03	0.31	na	na	na	na	na	na	0.46	1.31	0.35	na	na	na	na	na	na	hypothetical protein
ETH_00025690	6	0.33	0.49	2.28	0.21	0.52	2.01	0.26	0.55	1.95	0.28	0.48	1.79	0.27	0.07	0.11	0.58	0.52	1.35	0.39	hypothetical protein
ETH_00002615	3	0.33	na	na	na	0.9	1.82	0.49	0.37	1.39	0.27	na	na	na	0.02	0.08	0.23	na	na	na	hypothetical protein
ETH_00004740	1	0.33	na	na	na	na	na	na	na	na	na	na	na	na	0.03	0.1	0.33	na	na	na	hypothetical protein
ETH_00024630	3	0.33	0.52	3.14	0.16	na	na	na	na	na	na	0.38	2.81	0.14	0.25	0.37	0.69	na	na	na	hypothetical protein
ETH_00028875	1	0.33	na	na	na	na	na	na	na	na	na	na	na	na	0.06	0.2	0.33	na	na	na	hypothetical protein
ETH_00000075	4	0.33	0.72	1.92	0.37	NaN	NaN	NaN	na	na	na	0.58	3.18	0.18	0.06	0.12	0.48	0.6	2.14	0.28	hypothetical protein
ETH_00016610	6	0.33	0.35	1.6	0.22	0.39	1.65	0.24	0.4	1.79	0.22	0.58	1.23	0.47	0.03	0.04	0.61	0.37	1.71	0.22	hypothetical protein, conserved
ETH_00037270	4	0.33	0.34	2.76	0.12	na	na	na	NaN	NaN	NaN	0.57	1.28	0.45	0.15	0.3	0.5	0.55	2.19	0.25	hypothetical protein
ETH_00043880	3	0.33	NaN	NaN	NaN	0.42	1.35	0.31	na	na	na	0.93	2.23	0.42	0.09	0.36	0.26	na	na	na	zinc finger (CCCH type) protein, putative
ETH_00012305	3	0.33	na	na	na	0.49	1.54	0.32	na	na	na	1	2.08	0.48	0.03	0.15	0.19	na	na	na	hypothetical protein
ETH_00039460	4	0.33	0.42	2.45	0.17	0.55	1.48	0.37	na	na	na	0.46	1.91	0.24	0.17	0.32	0.53	na	na	na	hypothetical protein
ETH_00015335	4	0.33	0.74	1.97	0.37	0.46	1.22	0.38	na	na	na	0.7	5.67	0.12	0.05	0.11	0.44	na	na	na	hypothetical protein
ETH_00013260	5	0.33	0.53	1.63	0.32	na	na	na	0.57	1.83	0.31	0.46	1.41	0.33	0.05	0.12	0.45	0.55	2.31	0.24	hypothetical protein, conserved
ETH_00022085	2	0.33	na	na	na	0.32	1.28	0.25	na	na	na	na	na	na	0.08	0.19	0.41	na	na	na	hypothetical protein, conserved
ETH_00039705	6	0.33	0.38	1.5	0.26	0.48	1.58	0.3	0.42	1.46	0.29	1.29	2.41	0.54	0.05	0.2	0.23	0.66	1.84	0.36	na
ETH_00018035	4	0.33	0.26	0.77	0.34	na	na	na	0.23	0.89	0.26	0.31	0.74	0.41	0.07	0.23	0.31	na	na	na	hypothetical protein
ETH_00008875	6	0.33	0.43	1.46	0.29	0.44	1.7	0.26	0.47	1.63	0.29	0.4	1.12	0.36	0.05	0.1	0.51	0.45	1.72	0.26	histidyl-tRNA synthetase, putative
ETH_00004090	3	0.33	0.54	1.32	0.41	na	na	na	na	na	na	na	na	na	0.04	0.08	0.43	0.54	3.56	0.15	hypothetical protein
ETH_00003060	1	0.33	na	na	na	na	na	na	na	na	na	na	na	na	0.09	0.28	0.33	na	na	na	hypothetical protein, conserved
ETH_00021565	3	0.33	0.31	1.75	0.18	0.84	1.15	0.73	NaN	NaN	NaN	NaN	NaN	NaN	0.01	0.07	0.07	na	na	na	hypothetical protein, conserved
ETH_00015345	3	0.33	na	na	na	na	na	na	0.56	1.86	0.3	0.25	0.95	0.26	0.27	0.63	0.42	na	na	na	hypothetical protein
ETH_00004310	1	0.33	na	na	na	na	na	na	na	na	na	na	na	na	0.05	0.15	0.33	na	na	na	CMGC kinase, CDK family TgPK2, putative
ETH_00023155	2	0.33	NaN	NaN	NaN	0.25	1.38	0.18	NaN	NaN	NaN	NaN	NaN	NaN	0.43	0.9	0.48	NaN	NaN	NaN	hypothetical protein
ETH_00040555	4	0.33	0.33	1.75	0.19	na	na	na	0.67	1.06	0.63	NaN	NaN	NaN	0.03	0.15	0.23	0.33	1.29	0.25	hypothetical protein
ETH_00024520	4	0.33	na	na	na	0.57	1.96	0.29	0.69	2.22	0.31	0.63	2.15	0.29	0.03	0.08	0.42	na	na	na	hypothetical protein, conserved
ETH_00018425	2	0.33	NaN	NaN	NaN	NaN	NaN	NaN	0.71	2.33	0.3	NaN	NaN	NaN	0.06	0.16	0.35	na	na	na	copper-transporting ATPase, putative
ETH_00025660	2	0.33	na	na	na	na	na	na	0.42	1.26	0.33	na	na	na	0.05	0.14	0.32	na	na	na	hypothetical protein
ETH_00015275	4	0.33	0.58	2.09	0.28	0.58	1.88	0.31	0.53	2.33	0.23	na	na	na	0.03	0.06	0.49	NaN	NaN	NaN	hypothetical protein
ETH_00028850	4	0.33	0.51	2.02	0.25	0.49	1.45	0.34	0.49	2.51	0.2	na	na	na	0.04	0.08	0.52	NaN	NaN	NaN	hypothetical protein
ETH_00029270	1	0.33	na	na	na	na	na	na	na	na	na	na	na	na	0.05	0.17	0.33	na	na	na	hypothetical protein
ETH_00004760	1	0.33	na	na	na	na	na	na	na	na	na	na	na	na	0.03	0.09	0.33	na	na	na	DNA polymerase (EC 2.7.7.7), related
ETH_00039800	4	0.33	0.6	1.56	0.39	0.69	1.91	0.36	na	na	na	0.44	1.87	0.23	0.05	0.17	0.32	na	na	na	hypothetical protein
ETH_00012555	2	0.33	NaN	NaN	NaN	0.83	1.84	0.45	NaN	NaN	NaN	na	na	na	0.06	0.32	0.2	na	na	na	X-Pro dipeptidyl-peptidase domain-containing protein, putative
ETH_00027045	4	0.33	0.28	1.67	0.17	0.35	2.16	0.16	NaN	NaN	NaN	0.4	1.26	0.31	0.05	0.08	0.66	NaN	NaN	NaN	hypothetical protein
ETH_00001970	5	0.33	0.61	1.92	0.32	0.59	1.52	0.39	NaN	NaN	NaN	0.59	2.27	0.26	0.19	0.37	0.51	0.54	3.73	0.15	hypothetical protein, conserved
ETH_00008375	1	0.33	na	na	na	na	na	na	na	na	na	na	na	na	0.03	0.08	0.33	na	na	na	hypothetical protein
ETH_00027965	1	0.32	na	na	na	na	na	na	na	na	na	na	na	na	0.05	0.15	0.32	na	na	na	hypothetical protein
ETH_00021085	1	0.32	na	na	na	na	na	na	na	na	na	na	na	na	0.04	0.12	0.32	na	na	na	hypothetical protein
ETH_00008370	1	0.32	na	na	na	na	na	na	na	na	na	na	na	na	0.04	0.11	0.32	na	na	na	hypothetical protein
ETH_00001190	2	0.32	NaN	NaN	NaN	0.14	2.5	0.06	NaN	NaN	NaN	0.66	1.11	0.59	na	na	na	na	na	na	hypothetical protein, conserved
ETH_00017585	1	0.32	na	na	na	na	na	na	na	na	na	na	na	na	0.12	0.36	0.32	na	na	na	hypothetical protein, conserved
ETH_00041700	4	0.32	0.54	3.67	0.15	0.58	1.67	0.35	NaN	NaN	NaN	0.65	2.32	0.28	0.12	0.24	0.52	na	na	na	hypothetical protein
ETH_00026420	5	0.32	0.54	1.84	0.29	0.63	1.55	0.41	0.56	1.55	0.36	na	na	na	0.05	0.14	0.33	0.62	2.7	0.23	hypothetical protein
ETH_00042065	2	0.32	NaN	NaN	NaN	NaN	NaN	NaN	NaN	NaN	NaN	NaN	NaN	NaN	0.08	0.24	0.34	1.06	3.47	0.31	hypothetical protein, conserved
ETH_00019940	1	0.32	na	na	na	na	na	na	na	na	na	na	na	na	0.05	0.15	0.32	na	na	na	hypothetical protein
ETH_00013830	5	0.32	0.42	1.7	0.25	NaN	NaN	NaN	0.35	4.18	0.08	0.53	1.35	0.39	0.27	0.58	0.47	0.53	1.27	0.42	hypothetical protein
ETH_00021775	3	0.32	0.43	1.56	0.27	na	na	na	na	na	na	1.05	1.97	0.53	0.06	0.36	0.16	na	na	na	hypothetical protein
ETH_00020205	2	0.32	0.52	1.3	0.4	na	na	na	na	na	na	0.44	1.75	0.25	na	na	na	na	na	na	hypothetical protein
ETH_00039650	1	0.32	0.66	2.04	0.32	na	na	na	na	na	na	na	na	na	na	na	na	na	na	na	hypothetical protein
ETH_00005280	1	0.32	na	na	na	na	na	na	na	na	na	na	na	na	0.08	0.25	0.32	na	na	na	hypothetical protein
ETH_00040425	3	0.32	0.39	1.34	0.29	0.76	2.68	0.29	0.68	1.74	0.39	NaN	NaN	NaN	na	na	na	NaN	NaN	NaN	na
ETH_00034925	1	0.32	na	na	na	na	na	na	na	na	na	na	na	na	0.06	0.18	0.32	na	na	na	sag
ETH_00014620	1	0.32	NaN	NaN	NaN	NaN	NaN	NaN	NaN	NaN	NaN	NaN	NaN	NaN	0.04	0.14	0.32	NaN	NaN	NaN	formin binding protein, putative
ETH_00037675	4	0.32	0.51	1.48	0.34	0.46	1.88	0.24	0.53	1.53	0.35	na	na	na	na	na	na	0.48	1.34	0.36	hypothetical protein
ETH_00000705	1	0.32	na	na	na	na	na	na	na	na	na	na	na	na	0.04	0.13	0.32	na	na	na	hypothetical protein
ETH_00019300	6	0.32	0.37	1	0.37	0.51	1.33	0.38	0.44	1.34	0.33	0.36	1.06	0.34	0.03	0.11	0.25	0.44	1.72	0.26	hypothetical protein
ETH_00012800	1	0.32	na	na	na	na	na	na	na	na	na	na	na	na	0.07	0.23	0.32	na	na	na	hypothetical protein
ETH_00028230	6	0.32	0.5	1.84	0.27	0.48	1.6	0.3	0.55	1.66	0.33	0.47	1.47	0.32	0.05	0.12	0.4	0.46	1.49	0.31	hypothetical protein
ETH_00017690	5	0.32	0.48	1.76	0.27	NaN	NaN	NaN	0.59	2.49	0.24	0.48	1.07	0.45	0.04	0.08	0.46	0.52	2.67	0.2	hypothetical protein, conserved
ETH_00040585	4	0.32	0.17	1.85	0.09	na	na	na	0.81	1.63	0.49	na	na	na	0.02	0.09	0.24	0.63	1.39	0.45	na
ETH_00032105	2	0.32	na	na	na	0.31	1.57	0.19	na	na	na	na	na	na	0.17	0.37	0.45	na	na	na	DnaJ domain-containing protein, putative
ETH_00018880	6	0.32	0.28	1.02	0.28	0.31	1	0.31	0.33	1.42	0.23	0.49	1.67	0.29	0.05	0.12	0.44	0.43	1.12	0.38	hypothetical protein, conserved
ETH_00003535	2	0.32	NaN	NaN	NaN	0.64	1.3	0.5	na	na	na	na	na	na	0.02	0.16	0.15	na	na	na	hypothetical protein
ETH_00020740	3	0.32	0.49	1.05	0.47	0.4	1.35	0.3	na	na	na	na	na	na	0.03	0.14	0.2	na	na	na	hypothetical protein
ETH_00026910	4	0.32	0.57	1.59	0.36	na	na	na	NaN	NaN	NaN	0.51	1.82	0.28	0.05	0.1	0.51	0.56	4.17	0.14	hypothetical protein, conserved
ETH_00004195	3	0.32	0.18	1.62	0.11	0.98	1.2	0.82	NaN	NaN	NaN	na	na	na	0.01	0.15	0.03	na	na	na	hypothetical protein, conserved
ETH_00026550	2	0.32	NaN	NaN	NaN	na	na	na	0.43	2.42	0.18	na	na	na	0.06	0.12	0.46	na	na	na	hypothetical protein
ETH_00007135	2	0.32	NaN	NaN	NaN	0.26	0.95	0.27	na	na	na	na	na	na	0.03	0.09	0.37	NaN	NaN	NaN	erv1 / Alr family domain-containing protein, putative
ETH_00000460	2	0.32	NaN	NaN	NaN	NaN	NaN	NaN	NaN	NaN	NaN	NaN	NaN	NaN	0.01	0.04	0.38	0.68	2.62	0.26	hypothetical protein, conserved
ETH_00039365	1	0.32	na	na	na	na	na	na	na	na	na	na	na	na	0.06	0.19	0.32	na	na	na	hypothetical protein
ETH_00024425	2	0.32	0.55	2.09	0.26	na	na	na	na	na	na	na	na	na	0.08	0.2	0.38	na	na	na	hypothetical protein
ETH_00009400	1	0.32	na	na	na	na	na	na	na	na	na	na	na	na	0.03	0.11	0.32	na	na	na	hypothetical protein
ETH_00012435	6	0.32	0.33	1.27	0.26	0.21	1.1	0.19	0.35	1.34	0.26	0.35	1.2	0.3	0.06	0.14	0.45	0.9	1.95	0.46	hypothetical protein
ETH_00019220	4	0.32	0.35	1.54	0.23	na	na	na	NaN	NaN	NaN	0.44	1.78	0.25	0.04	0.07	0.57	0.53	2.21	0.24	hypothetical protein, conserved
ETH_00004175	3	0.32	NaN	NaN	NaN	0.53	2.15	0.25	NaN	NaN	NaN	0.7	2.44	0.29	0.05	0.11	0.42	NaN	NaN	NaN	hypothetical protein
ETH_00011130	4	0.32	0.49	2.07	0.24	0.49	1.82	0.27	0.46	1.31	0.35	na	na	na	0.06	0.14	0.42	na	na	na	hypothetical protein, conserved
ETH_00006890	2	0.32	na	na	na	na	na	na	na	na	na	0.24	2.01	0.12	0.02	0.05	0.52	na	na	na	hypothetical protein
ETH_00015990	5	0.32	0.67	4.11	0.16	0.72	1.6	0.45	0.59	2.08	0.28	na	na	na	0.07	0.18	0.42	0.81	2.9	0.28	hypothetical protein
ETH_00024790	3	0.32	0.3	0.74	0.4	0.42	1.49	0.28	na	na	na	na	na	na	0.03	0.12	0.27	na	na	na	hypothetical protein
ETH_00024065	1	0.32	na	na	na	na	na	na	NaN	NaN	NaN	na	na	na	0.03	0.11	0.32	na	na	na	hypothetical protein
ETH_00016005	2	0.32	na	na	na	NaN	NaN	NaN	na	na	na	0.66	2.04	0.32	0.08	0.27	0.31	na	na	na	hypothetical protein
ETH_00004160	1	0.32	na	na	na	na	na	na	na	na	na	na	na	na	0.03	0.1	0.32	na	na	na	hypothetical protein
ETH_00035420	6	0.32	0.31	1.23	0.25	0.34	0.91	0.37	0.32	1.2	0.27	0.36	1.27	0.29	0.09	0.17	0.51	0.54	2.46	0.22	hypothetical protein
ETH_00008325	6	0.32	0.39	1.83	0.22	0.35	1.56	0.23	0.42	2.25	0.19	0.6	1.66	0.36	0.06	0.14	0.39	0.87	1.64	0.53	hypothetical protein
ETH_00012845	1	0.32	na	na	na	na	na	na	na	na	na	na	na	na	0.06	0.18	0.32	na	na	na	hypothetical protein, conserved
ETH_00024710	3	0.32	0.43	1.57	0.27	na	na	na	na	na	na	0.62	1.59	0.39	0.04	0.12	0.3	na	na	na	MIZ zinc finger protein, putative
ETH_00032430	5	0.32	na	na	na	0.38	1.62	0.23	0.3	2.12	0.14	0.34	2.65	0.13	0.04	0.18	0.24	1.26	1.48	0.85	hypothetical protein, conserved
ETH_00010770	1	0.32	na	na	na	na	na	na	na	na	na	na	na	na	0.08	0.26	0.32	na	na	na	sag
ETH_00001720	4	0.32	0.65	1.81	0.36	na	na	na	NaN	NaN	NaN	0.5	2.05	0.25	0.04	0.12	0.32	0.53	1.56	0.34	hypothetical protein
ETH_00026160	5	0.32	0.38	1.18	0.33	0.36	1.36	0.26	na	na	na	0.33	1.78	0.19	0.03	0.13	0.2	0.81	1.32	0.61	hypothetical protein, conserved
ETH_00035180	2	0.32	na	na	na	0.46	1.54	0.3	NaN	NaN	NaN	na	na	na	0.06	0.16	0.34	na	na	na	hypothetical protein, conserved
ETH_00009110	5	0.32	0.57	1.77	0.32	0.56	1.54	0.36	na	na	na	0.51	1.88	0.27	0.05	0.11	0.45	0.59	3.15	0.19	hypothetical protein
ETH_00003910	2	0.32	na	na	na	NaN	NaN	NaN	na	na	na	0.53	2	0.26	0.04	0.11	0.37	na	na	na	Zinc finger (CCCH type) protein, related
ETH_00017145	5	0.32	na	na	na	0.41	1.09	0.38	0.39	1.13	0.35	0.36	1.29	0.28	0.04	0.15	0.25	0.37	1.09	0.34	hypothetical protein, conserved
ETH_00031310	1	0.32	na	na	na	na	na	na	na	na	na	na	na	na	0.04	0.13	0.32	na	na	na	hypothetical protein
ETH_00031560	2	0.32	NaN	NaN	NaN	na	na	na	0.4	2.63	0.15	na	na	na	0.18	0.36	0.48	na	na	na	hypothetical protein
ETH_00022055	5	0.32	0.58	1.6	0.36	0.53	1.6	0.33	0.47	1.81	0.26	na	na	na	0.03	0.11	0.3	0.56	1.63	0.34	hypothetical protein
ETH_00037065	2	0.32	NaN	NaN	NaN	0.66	2.46	0.27	NaN	NaN	NaN	0.85	2.31	0.37	na	na	na	na	na	na	na
ETH_00023460	1	0.32	na	na	na	na	na	na	na	na	na	na	na	na	0.02	0.07	0.32	na	na	na	hypothetical protein
ETH_00039135	3	0.32	0.36	2.13	0.17	na	na	na	1	1.61	0.62	na	na	na	0.01	0.09	0.16	na	na	na	zinc transporter ZIP domain-containing protein, putative
ETH_00032285	5	0.32	0.31	1.31	0.24	0.36	1.28	0.28	na	na	na	0.31	1.38	0.23	0.43	0.66	0.65	0.3	1.57	0.19	hypothetical protein, conserved
ETH_00006985	1	0.32	na	na	na	na	na	na	na	na	na	na	na	na	0.02	0.06	0.32	na	na	na	hypothetical protein
ETH_00010690	3	0.32	0.48	1.37	0.35	0.82	2.02	0.41	na	na	na	na	na	na	0.02	0.09	0.19	NaN	NaN	NaN	hypothetical protein
ETH_00019925	6	0.32	0.43	1.93	0.22	0.43	1.97	0.22	0.49	1.34	0.37	0.37	1.48	0.25	0.06	0.11	0.54	0.4	1.31	0.31	hypothetical protein
ETH_00029135	2	0.32	na	na	na	0.27	1.57	0.17	NaN	NaN	NaN	na	na	na	0.04	0.08	0.46	na	na	na	serine/threonine protein phosphatase, putative
ETH_00012065	4	0.32	0.4	0.91	0.44	0.32	1.01	0.32	na	na	na	0.4	1.14	0.35	na	na	na	0.32	1.97	0.16	hypothetical protein
ETH_00000570	5	0.32	0.55	1.4	0.4	0.51	1.98	0.26	0.63	2.17	0.29	0.52	2.55	0.21	0.05	0.11	0.44	na	na	na	hypothetical protein
ETH_00040600	1	0.32	na	na	na	na	na	na	na	na	na	na	na	na	0.04	0.12	0.32	na	na	na	hypothetical protein
ETH_00026220	5	0.32	NaN	NaN	NaN	0.52	1.21	0.43	0.48	1.92	0.25	0.43	1.99	0.22	0.06	0.14	0.42	0.43	1.61	0.26	hypothetical protein
ETH_00030855	1	0.32	na	na	na	na	na	na	na	na	na	na	na	na	0.07	0.21	0.32	na	na	na	hypothetical protein
ETH_00002485	1	0.32	NaN	NaN	NaN	NaN	NaN	NaN	NaN	NaN	NaN	NaN	NaN	NaN	0.14	0.43	0.32	NaN	NaN	NaN	hypothetical protein
ETH_00007775	4	0.32	0.57	2.03	0.28	0.93	3.09	0.3	na	na	na	0.86	2.24	0.38	0.06	0.2	0.3	na	na	na	hypothetical protein
ETH_00017370	4	0.32	0.18	2.01	0.09	0.8	1.5	0.54	NaN	NaN	NaN	0.31	1.7	0.18	0.09	0.19	0.45	na	na	na	hypothetical protein
ETH_00016785	3	0.32	0.46	1.41	0.33	0.71	1.47	0.48	na	na	na	na	na	na	0.02	0.11	0.14	na	na	na	hypothetical protein
ETH_00004655	4	0.32	NaN	NaN	NaN	0.48	1.08	0.44	NaN	NaN	NaN	0.45	1.72	0.26	0.03	0.16	0.17	0.73	1.86	0.39	zinc finger (C3HC4 RING finger) protein, putative
ETH_00014375	2	0.32	NaN	NaN	NaN	0.86	2.17	0.4	NaN	NaN	NaN	NaN	NaN	NaN	0.05	0.2	0.24	NaN	NaN	NaN	NMD3 protein, putative
ETH_00036670	2	0.32	na	na	na	0.88	2	0.44	na	na	na	0.37	1.94	0.19	na	na	na	na	na	na	hypothetical protein
ETH_00001640	3	0.32	0.41	1.6	0.26	0.55	1.41	0.39	na	na	na	na	na	na	0.07	0.23	0.3	na	na	na	hypothetical protein
ETH_00001580	1	0.32	na	na	na	na	na	na	na	na	na	na	na	na	0.04	0.14	0.32	na	na	na	hypothetical protein
ETH_00030740	1	0.32	na	na	na	na	na	na	na	na	na	na	na	na	0.05	0.17	0.32	na	na	na	prefoldin subunit, putative
ETH_00003865	1	0.32	na	na	na	na	na	na	na	na	na	na	na	na	0.04	0.13	0.32	na	na	na	hypothetical protein
ETH_00021235	1	0.32	na	na	na	na	na	na	na	na	na	na	na	na	0.04	0.14	0.32	na	na	na	hypothetical protein
ETH_00010535	5	0.32	0.38	1.33	0.29	0.35	1.21	0.29	0.4	1.3	0.31	na	na	na	0.04	0.1	0.41	0.34	1.2	0.29	hypothetical protein
ETH_00002700	1	0.32	na	na	na	na	na	na	na	na	na	na	na	na	0.03	0.1	0.32	na	na	na	ribosomal protein L24, putative
ETH_00026800	1	0.32	NaN	NaN	NaN	NaN	NaN	NaN	na	na	na	na	na	na	0.06	0.19	0.32	na	na	na	tRNA (guanine-N1)-methyltransferase, putative
ETH_00013010	6	0.32	0.64	1.67	0.38	0.41	1.3	0.31	0.4	2.24	0.18	0.6	1.05	0.57	0.03	0.11	0.25	0.5	2.63	0.19	GATA zinc finger domain-containing protein, putative
ETH_00016805	5	0.32	0.32	1.48	0.22	0.46	1.12	0.41	0.27	1.63	0.17	0.27	0.76	0.36	0.14	0.33	0.42	na	na	na	hypothetical protein
ETH_00010715	6	0.32	0.29	1.02	0.28	0.39	1.13	0.35	0.25	1.03	0.24	0.26	1.04	0.25	0.06	0.13	0.48	0.35	1.19	0.3	ATPase domain-containing cell division control protein, putative
ETH_00012110	1	0.32	na	na	na	na	na	na	0.32	1	0.32	na	na	na	na	na	na	na	na	na	hypothetical protein
ETH_00028245	2	0.32	na	na	na	0.36	1.69	0.21	na	na	na	na	na	na	0.05	0.11	0.42	na	na	na	hypothetical protein, conserved
ETH_00024920	4	0.32	0.26	1.02	0.26	na	na	na	na	na	na	0.23	1.25	0.18	0.06	0.08	0.76	0.21	3.33	0.06	hypothetical protein
ETH_00031925	6	0.32	0.39	1.31	0.29	0.34	1.07	0.32	0.43	1.45	0.3	0.4	1.24	0.33	0.04	0.09	0.44	0.43	2.05	0.21	hypothetical protein
ETH_00017350	4	0.32	0.5	1.79	0.28	na	na	na	0.31	1.17	0.27	0.26	1.08	0.24	0.1	0.21	0.47	na	na	na	hypothetical protein
ETH_00011850	4	0.31	0.39	2.27	0.17	0.98	2.36	0.41	NaN	NaN	NaN	na	na	na	0.06	0.28	0.21	0.86	1.87	0.46	hypothetical protein, conserved
ETH_00012495	4	0.31	0.22	1.15	0.19	na	na	na	0.18	1.01	0.18	na	na	na	0.91	1.52	0.6	0.46	1.59	0.29	hypothetical protein
ETH_00013540	1	0.31	na	na	na	na	na	na	na	na	na	na	na	na	0.05	0.15	0.31	na	na	na	hypothetical protein
ETH_00016915	1	0.31	na	na	na	na	na	na	na	na	na	na	na	na	0.05	0.17	0.31	na	na	na	hypothetical protein
ETH_00018335	4	0.31	na	na	na	0.49	1.3	0.37	na	na	na	0.46	1.87	0.25	0.05	0.14	0.35	0.48	1.72	0.28	hypothetical protein
ETH_00036790	2	0.31	na	na	na	na	na	na	na	na	na	0.35	1.4	0.25	na	na	na	0.42	1.1	0.38	hypothetical protein
ETH_00034900	2	0.31	na	na	na	0.51	2.59	0.2	0.56	1.3	0.43	na	na	na	na	na	na	na	na	na	sag
ETH_00003215	1	0.31	na	na	na	na	na	na	na	na	na	na	na	na	0.1	0.33	0.31	na	na	na	hypothetical protein
ETH_00000840	6	0.31	0.63	2.56	0.25	0.67	2.57	0.26	0.66	2.28	0.29	0.57	1.46	0.39	0.05	0.14	0.36	0.59	1.75	0.34	hypothetical protein
ETH_00006850	1	0.31	na	na	na	na	na	na	na	na	na	na	na	na	0.04	0.12	0.31	na	na	na	hypothetical protein
ETH_00029795	3	0.31	0.37	1.59	0.23	na	na	na	na	na	na	0.52	2.25	0.23	0.17	0.35	0.48	na	na	na	hypothetical protein, conserved
ETH_00020705	5	0.31	0.42	1.36	0.31	0.42	1.25	0.33	0.52	1.5	0.35	NaN	NaN	NaN	0.04	0.16	0.28	0.45	1.55	0.29	hypothetical protein, conserved
ETH_00018845	1	0.31	na	na	na	na	na	na	na	na	na	na	na	na	0.18	0.56	0.31	na	na	na	hypothetical protein, conserved
ETH_00036150	5	0.31	0.25	2.28	0.11	0.45	1.7	0.27	1.16	2.1	0.55	0.8	2.34	0.34	0.06	0.2	0.3	NaN	NaN	NaN	hypothetical protein
ETH_00004875	1	0.31	na	na	na	na	na	na	NaN	NaN	NaN	na	na	na	0.03	0.1	0.31	na	na	na	hypothetical protein, conserved
ETH_00028890	1	0.31	na	na	na	na	na	na	na	na	na	na	na	na	0.03	0.1	0.31	na	na	na	hypothetical protein
ETH_00008630	3	0.31	na	na	na	0.2	1.49	0.13	NaN	NaN	NaN	na	na	na	0.32	0.54	0.59	0.24	1.1	0.22	adaptin N terminal region domain-containing protein, putative
ETH_00001985	2	0.31	0.35	1.28	0.27	na	na	na	na	na	na	na	na	na	0.05	0.13	0.35	na	na	na	hypothetical protein
ETH_00037575	1	0.31	na	na	na	na	na	na	na	na	na	na	na	na	0.01	0.04	0.31	na	na	na	hypothetical protein
ETH_00020050	5	0.31	0.44	1.46	0.3	0.45	1.58	0.29	0.47	1.62	0.29	0.45	1.58	0.28	0.04	0.11	0.4	na	na	na	hypothetical protein
ETH_00012645	6	0.31	0.29	1.43	0.2	0.41	1.16	0.35	0.32	1.33	0.24	0.63	2.2	0.29	0.09	0.2	0.46	0.84	2.54	0.33	hypothetical protein
ETH_00019130	5	0.31	0.37	1.29	0.28	0.46	1.39	0.33	0.47	1.41	0.34	na	na	na	0.04	0.12	0.31	0.37	1.22	0.3	leucine rich repeat protein, putative
ETH_00028330	1	0.31	NaN	NaN	NaN	na	na	na	na	na	na	na	na	na	0.02	0.07	0.31	na	na	na	hypothetical protein
ETH_00000770	3	0.31	na	na	na	0.32	2.31	0.14	0.92	1.71	0.54	na	na	na	0.06	0.21	0.26	NaN	NaN	NaN	ATP-dependent DNA helicase II, 70 kDa subunit, putative
ETH_00013250	2	0.31	NaN	NaN	NaN	na	na	na	na	na	na	na	na	na	0.07	0.19	0.37	0.65	2.52	0.26	mitochondrial carrier family protein, putative
ETH_00010255	1	0.31	na	na	na	na	na	na	NaN	NaN	NaN	na	na	na	0.06	0.19	0.31	na	na	na	RNA polymerase, putative
ETH_00016525	3	0.31	na	na	na	0.51	1.71	0.3	na	na	na	0.75	1.5	0.5	0.02	0.17	0.14	na	na	na	hypothetical protein
ETH_00000780	5	0.31	0.37	1.31	0.28	0.25	1.33	0.19	0.4	1.82	0.22	na	na	na	0.06	0.16	0.4	0.44	0.94	0.46	hypothetical protein
ETH_00008420	2	0.31	na	na	na	0.4	0.82	0.49	na	na	na	na	na	na	0.03	0.26	0.13	na	na	na	hypothetical protein
ETH_00010735	1	0.31	na	na	na	na	na	na	na	na	na	na	na	na	0.09	0.29	0.31	na	na	na	sag
ETH_00016890	1	0.31	na	na	na	NaN	NaN	NaN	NaN	NaN	NaN	NaN	NaN	NaN	0.07	0.22	0.31	NaN	NaN	NaN	subtilase family serine protease, putative
ETH_00026580	2	0.31	NaN	NaN	NaN	NaN	NaN	NaN	0.64	2.29	0.28	na	na	na	0.03	0.09	0.34	NaN	NaN	NaN	hypothetical protein
ETH_00007380	3	0.31	NaN	NaN	NaN	na	na	na	0.66	1.83	0.36	na	na	na	0.04	0.13	0.34	0.77	3.35	0.23	hypothetical protein
ETH_00020245	5	0.31	0.49	1.93	0.25	0.51	1.4	0.37	0.51	1.62	0.31	na	na	na	0.04	0.14	0.29	0.55	1.71	0.32	hypothetical protein
ETH_00016295	1	0.31	na	na	na	na	na	na	na	na	na	na	na	na	0.04	0.14	0.31	na	na	na	hypothetical protein
ETH_00004130	4	0.31	0.54	2.03	0.26	0.46	2.49	0.19	NaN	NaN	NaN	na	na	na	0.04	0.1	0.42	0.54	1.45	0.37	hypothetical protein
ETH_00028485	5	0.31	0.4	1.18	0.34	0.38	1.96	0.19	0.4	1.4	0.29	na	na	na	0.06	0.14	0.46	0.4	1.47	0.27	ubiquitin / ribosomal protein S27a fusion protein, putative
ETH_00012200	1	0.31	na	na	na	na	na	na	na	na	na	0.74	2.38	0.31	na	na	na	na	na	na	esf1 family
ETH_00014845	5	0.31	0.59	1.87	0.32	0.54	1.75	0.31	0.52	1.6	0.33	0.5	1.72	0.29	0.04	0.12	0.3	na	na	na	hypothetical protein
ETH_00008435	6	0.31	0.83	1.83	0.45	0.55	1.97	0.28	0.84	1.98	0.43	0.45	1.74	0.26	0.01	0.08	0.13	0.56	1.81	0.31	hypothetical protein
ETH_00005645	6	0.31	0.41	1.28	0.32	0.4	1.4	0.28	0.46	1.8	0.26	0.42	1.42	0.29	0.08	0.19	0.41	0.41	1.39	0.29	Dpy-30 motif containing protein, putative
ETH_00013710	2	0.31	na	na	na	0.51	1.53	0.33	NaN	NaN	NaN	na	na	na	na	na	na	0.66	2.33	0.28	hypothetical protein, conserved
ETH_00007955	6	0.31	0.46	1.35	0.34	0.41	1.51	0.27	0.49	1.47	0.34	0.39	1.54	0.26	0.03	0.08	0.4	0.41	1.59	0.26	hypothetical protein
ETH_00033865	4	0.31	0.33	1.83	0.18	0.38	1.41	0.27	0.64	2.8	0.23	na	na	na	0.1	0.18	0.56	na	na	na	na
ETH_00004590	4	0.31	na	na	na	0.48	1.39	0.35	na	na	na	0.51	1.86	0.27	0.03	0.08	0.4	0.45	2.1	0.22	hypothetical protein
ETH_00031430	1	0.31	na	na	na	na	na	na	na	na	na	na	na	na	0.13	0.41	0.31	na	na	na	hypothetical protein
ETH_00021850	4	0.31	0.56	1.78	0.31	0.52	1.02	0.51	na	na	na	na	na	na	0.01	0.15	0.08	0.53	1.61	0.33	hypothetical protein
ETH_00027310	2	0.31	na	na	na	NaN	NaN	NaN	na	na	na	0.54	2.3	0.24	0.07	0.19	0.38	na	na	na	hypothetical protein
ETH_00006950	3	0.31	NaN	NaN	NaN	0.33	2.29	0.14	na	na	na	0.41	1.11	0.37	0.14	0.34	0.42	na	na	na	hypothetical protein, conserved
ETH_00007275	2	0.31	0.53	2.35	0.23	na	na	na	na	na	na	na	na	na	0.09	0.24	0.39	NaN	NaN	NaN	hypothetical protein
ETH_00005630	3	0.31	na	na	na	na	na	na	0.6	1.98	0.3	0.88	3.44	0.25	0.05	0.14	0.37	NaN	NaN	NaN	hypothetical protein
ETH_00043590	5	0.31	0.45	1.82	0.25	na	na	na	0.67	1.95	0.34	0.8	3.12	0.26	0.08	0.22	0.37	0.46	1.4	0.33	hypothetical protein
ETH_00039825	5	0.31	0.38	1.2	0.32	0.31	0.97	0.32	0.38	1.04	0.36	0.28	1.23	0.23	0.06	0.18	0.31	NaN	NaN	NaN	hypothetical protein
ETH_00012025	4	0.31	0.4	1.69	0.24	0.3	1.74	0.17	NaN	NaN	NaN	0.8	1.18	0.68	0.03	0.2	0.14	na	na	na	hypothetical protein
ETH_00021425	6	0.31	0.36	1.59	0.23	0.41	1.9	0.21	0.44	1.5	0.29	0.41	1.34	0.31	0.06	0.1	0.58	0.34	1.47	0.23	hypothetical protein, conserved
ETH_00023665	4	0.31	NaN	NaN	NaN	0.39	1.31	0.3	0.47	2.1	0.22	0.41	1.49	0.28	0.14	0.33	0.44	NaN	NaN	NaN	hypothetical protein
ETH_00018750	1	0.31	na	na	na	na	na	na	na	na	na	na	na	na	0.03	0.09	0.31	na	na	na	hypothetical protein
ETH_00024385	5	0.31	0.44	4.8	0.09	0.72	1.67	0.43	0.42	2.63	0.16	0.42	1.3	0.32	0.06	0.11	0.54	na	na	na	hypothetical protein, conserved
ETH_00043120	5	0.31	0.26	2.33	0.11	0.2	1.72	0.12	1.11	1.35	0.82	NaN	NaN	NaN	0.01	0.19	0.06	1.02	2.37	0.43	hypothetical protein, conserved
ETH_00001535	6	0.31	0.35	1.59	0.22	0.77	1.2	0.64	0.28	1.93	0.15	0.25	1.45	0.17	0.04	0.08	0.47	0.28	1.44	0.2	hypothetical protein
ETH_00021490	1	0.31	na	na	na	na	na	na	na	na	na	na	na	na	0.1	0.32	0.31	na	na	na	hypothetical protein
ETH_00021800	1	0.31	na	na	na	na	na	na	na	na	na	na	na	na	0.03	0.1	0.31	na	na	na	hypothetical protein
ETH_00011815	1	0.31	na	na	na	na	na	na	na	na	na	na	na	na	0.1	0.32	0.31	na	na	na	hypothetical protein
ETH_00032915	3	0.31	NaN	NaN	NaN	NaN	NaN	NaN	0.4	1.3	0.31	na	na	na	0.06	0.16	0.37	0.54	2.18	0.25	hypothetical protein
ETH_00013730	1	0.31	na	na	na	na	na	na	na	na	na	na	na	na	0.02	0.07	0.31	na	na	na	hypothetical protein
ETH_00000455	4	0.31	na	na	na	0.5	2.06	0.24	0.57	1.8	0.31	0.56	1.68	0.33	na	na	na	0.49	1.44	0.34	GA28568, related
ETH_00015535	6	0.31	0.54	1.7	0.32	0.43	1.2	0.36	0.51	2.25	0.23	0.42	1.32	0.32	0.04	0.15	0.27	0.59	1.7	0.35	hypothetical protein
ETH_00026180	3	0.31	0.46	2.95	0.16	na	na	na	0.36	2.59	0.14	na	na	na	0.12	0.19	0.63	na	na	na	CHCH domain-containing protein, putative
ETH_00018500	4	0.31	NaN	NaN	NaN	0.62	1.83	0.34	NaN	NaN	NaN	0.61	2.18	0.28	0.06	0.16	0.38	0.63	2.76	0.23	leucine rich repeat protein, putative
ETH_00028965	3	0.31	0.4	1.51	0.27	na	na	na	0.42	1.71	0.25	na	na	na	na	na	na	0.53	1.29	0.41	hypothetical protein
ETH_00001200	1	0.31	na	na	na	na	na	na	NaN	NaN	NaN	NaN	NaN	NaN	0.08	0.27	0.31	na	na	na	hypothetical protein
ETH_00002530	6	0.31	0.53	1.99	0.27	0.44	1.56	0.28	0.51	1.83	0.28	0.45	1.66	0.27	0.06	0.1	0.53	0.46	2.18	0.21	hypothetical protein
ETH_00017120	6	0.31	0.42	1.98	0.21	0.5	1.81	0.28	0.59	1.94	0.3	0.46	1.72	0.27	0.06	0.13	0.49	0.57	2.01	0.29	hypothetical protein, conserved
ETH_00022960	6	0.31	0.36	1.48	0.24	0.45	1.6	0.28	0.51	2.6	0.2	0.45	2.06	0.22	0.09	0.13	0.68	0.44	1.93	0.23	hypothetical protein
ETH_00005670	3	0.31	na	na	na	na	na	na	0.56	2.44	0.23	na	na	na	0.05	0.13	0.42	0.62	2.25	0.27	hypothetical protein
ETH_00006420	4	0.31	0.47	1.48	0.32	0.5	1.41	0.36	na	na	na	na	na	na	0.02	0.1	0.22	0.46	1.42	0.32	hypothetical protein, conserved
ETH_00031670	6	0.31	0.53	1.7	0.31	0.51	2.16	0.24	0.64	1.9	0.34	0.47	2.35	0.2	0.05	0.09	0.49	0.48	1.84	0.26	hypothetical protein
ETH_00022295	6	0.31	0.53	1.57	0.34	0.46	2.77	0.17	0.5	2.28	0.22	0.57	1.4	0.4	0.21	0.51	0.41	0.49	1.65	0.3	hypothetical protein
ETH_00020360	4	0.31	0.38	1.29	0.3	0.4	1.24	0.32	0.46	1.37	0.33	na	na	na	0.03	0.11	0.27	na	na	na	hypothetical protein
ETH_00019105	6	0.31	0.49	1.59	0.31	0.41	1.63	0.25	0.41	1.81	0.23	0.38	2.19	0.17	0.07	0.12	0.59	0.38	1.31	0.29	hypothetical protein, conserved
ETH_00036215	2	0.31	NaN	NaN	NaN	NaN	NaN	NaN	na	na	na	0.85	1.84	0.46	0.04	0.27	0.15	na	na	na	na
ETH_00016220	1	0.31	na	na	na	na	na	na	na	na	na	na	na	na	0.02	0.08	0.31	na	na	na	hypothetical protein
ETH_00043075	1	0.31	NaN	NaN	NaN	na	na	na	na	na	na	na	na	na	0.1	0.31	0.31	na	na	na	hypothetical protein
ETH_00033210	3	0.31	0.57	1.63	0.35	na	na	na	0.56	2.27	0.25	na	na	na	0.03	0.1	0.32	na	na	na	hypothetical protein, conserved
ETH_00024875	4	0.31	0.44	1.78	0.25	0.42	1.87	0.22	NaN	NaN	NaN	na	na	na	0.04	0.23	0.17	0.74	1.28	0.58	hypothetical protein
ETH_00014470	3	0.31	0.6	2.24	0.27	na	na	na	NaN	NaN	NaN	na	na	na	0.05	0.1	0.46	0.56	3.1	0.18	hypothetical protein
ETH_00029130	1	0.31	NaN	NaN	NaN	na	na	na	NaN	NaN	NaN	na	na	na	0.06	0.2	0.31	na	na	na	hypothetical protein
ETH_00019420	6	0.31	0.4	1.53	0.26	0.41	1.42	0.29	0.4	1.6	0.25	0.39	1.51	0.26	0.05	0.09	0.52	0.33	1.32	0.25	hypothetical protein, conserved
ETH_00028915	1	0.31	na	na	na	na	na	na	na	na	na	na	na	na	0.03	0.09	0.31	na	na	na	hypothetical protein
ETH_00030575	3	0.3	na	na	na	0.41	1.42	0.29	NaN	NaN	NaN	0.87	1.85	0.47	0.02	0.16	0.15	NaN	NaN	NaN	hypothetical protein, conserved
ETH_00020115	4	0.3	0.52	1.88	0.28	0.53	1.69	0.32	na	na	na	0.55	1.42	0.39	na	na	na	0.54	2.28	0.24	hypothetical protein
ETH_00032015	2	0.3	na	na	na	na	na	na	na	na	na	0.48	2.68	0.18	0.04	0.1	0.43	na	na	na	hypothetical protein
ETH_00011945	2	0.3	na	na	na	0.59	1.68	0.35	na	na	na	na	na	na	0.04	0.14	0.25	NaN	NaN	NaN	sag
ETH_00007395	3	0.3	0.45	1.84	0.24	0.31	0.96	0.33	NaN	NaN	NaN	na	na	na	0.03	0.08	0.34	NaN	NaN	NaN	hypothetical protein
ETH_00001255	2	0.3	NaN	NaN	NaN	0.9	2.54	0.35	na	na	na	0.53	2.09	0.25	na	na	na	na	na	na	hypothetical protein
ETH_00035870	5	0.3	0.3	1.51	0.2	0.44	1.41	0.31	na	na	na	0.29	1.75	0.16	0.08	0.14	0.62	0.52	2.2	0.24	hypothetical protein
ETH_00008345	5	0.3	0.69	2.59	0.27	0.75	2.38	0.32	0.65	3.28	0.2	na	na	na	0.05	0.12	0.47	0.67	2.5	0.27	hypothetical protein
ETH_00031665	5	0.3	0.61	2.21	0.27	0.47	2.07	0.23	0.46	2.48	0.18	na	na	na	0.06	0.11	0.55	0.48	1.73	0.28	zinc finger (CHY type) protein, putative
ETH_00014890	1	0.3	na	na	na	na	na	na	na	na	na	na	na	na	0.03	0.11	0.3	na	na	na	hypothetical protein
ETH_00020710	6	0.3	0.46	1.72	0.27	0.47	2.03	0.23	0.41	1.4	0.29	0.39	1.23	0.31	0.07	0.14	0.49	0.45	1.97	0.23	hypothetical protein
ETH_00027165	5	0.3	0.62	1.82	0.34	0.91	2.33	0.39	0.53	2.11	0.25	0.83	1.91	0.44	na	na	na	0.56	5.6	0.1	hypothetical protein
ETH_00037125	2	0.3	NaN	NaN	NaN	0.45	1.83	0.25	NaN	NaN	NaN	NaN	NaN	NaN	0.08	0.23	0.36	NaN	NaN	NaN	hypothetical protein
ETH_00005115	4	0.3	0.41	2.54	0.16	NaN	NaN	NaN	0.39	1.47	0.27	na	na	na	0.07	0.12	0.55	0.32	1.37	0.23	hypothetical protein
ETH_00021995	5	0.3	na	na	na	0.66	2.22	0.3	0.67	1.62	0.42	0.59	1.82	0.32	0.02	0.13	0.15	0.62	1.86	0.33	hypothetical protein
ETH_00025330	5	0.3	0.64	1.45	0.44	0.52	1.76	0.29	0.55	3.03	0.18	na	na	na	0.02	0.14	0.14	0.52	1.14	0.45	hypothetical protein
ETH_00035640	5	0.3	0.44	1.62	0.27	0.56	1.31	0.43	0.47	1.43	0.33	0.75	2.76	0.27	na	na	na	0.74	3.47	0.21	hypothetical protein
ETH_00015590	3	0.3	0.37	1.76	0.21	na	na	na	NaN	NaN	NaN	0.43	1.93	0.22	0.11	0.23	0.47	NaN	NaN	NaN	hypothetical protein
ETH_00010450	1	0.3	na	na	na	na	na	na	na	na	na	na	na	na	0.07	0.23	0.3	na	na	na	hypothetical protein
ETH_00018305	3	0.3	na	na	na	na	na	na	na	na	na	0.6	2.51	0.24	0.04	0.15	0.3	0.59	1.61	0.37	esf1 family
ETH_00008580	4	0.3	0.72	1.73	0.42	0.41	1.61	0.25	0.53	1.67	0.32	na	na	na	0.05	0.22	0.22	na	na	na	hypothetical protein
ETH_00018025	4	0.3	0.64	2.26	0.28	na	na	na	0.51	1.87	0.27	na	na	na	0.07	0.18	0.37	0.68	2.34	0.29	hypothetical protein
ETH_00034425	1	0.3	na	na	na	na	na	na	na	na	na	na	na	na	0.04	0.13	0.3	na	na	na	hypothetical protein, conserved
ETH_00021740	5	0.3	0.41	1.12	0.37	0.33	1.27	0.26	0.46	1.36	0.34	na	na	na	0.03	0.11	0.31	0.45	1.9	0.24	hypothetical protein
ETH_00021440	6	0.3	0.57	1.87	0.31	0.59	1.69	0.35	0.54	2.03	0.26	0.53	1.77	0.3	0.04	0.13	0.32	0.54	1.98	0.27	hypothetical protein, conserved
ETH_00009870	6	0.3	0.4	1.41	0.28	0.43	1.39	0.31	0.4	1.6	0.25	0.43	2.75	0.16	0.19	0.34	0.55	0.43	1.64	0.26	hypothetical protein
ETH_00009075	4	0.3	0.63	2.14	0.3	NaN	NaN	NaN	0.67	2.08	0.32	0.56	3.22	0.17	0.05	0.13	0.41	NaN	NaN	NaN	hypothetical protein
ETH_00020340	6	0.3	0.44	1.74	0.25	0.48	1.64	0.29	0.41	1.61	0.26	0.42	2.04	0.2	0.04	0.07	0.6	0.49	2.41	0.2	hypothetical protein, conserved
ETH_00015555	5	0.3	0.18	1.63	0.11	0.17	2.32	0.07	NaN	NaN	NaN	0.84	1.2	0.7	0.02	0.1	0.22	0.97	2.39	0.41	enterophilin-2L, putative
ETH_00023640	1	0.3	na	na	na	na	na	na	na	na	na	na	na	na	0.04	0.13	0.3	na	na	na	hypothetical protein
ETH_00006840	1	0.3	na	na	na	na	na	na	na	na	na	na	na	na	0.03	0.1	0.3	na	na	na	hypothetical protein
ETH_00014715	1	0.3	NaN	NaN	NaN	NaN	NaN	NaN	na	na	na	na	na	na	0.08	0.28	0.3	NaN	NaN	NaN	thiF family domain-containing protein, putative
ETH_00005325	4	0.3	0.45	2.67	0.17	0.97	1.84	0.53	na	na	na	0.8	2	0.4	0.02	0.15	0.11	na	na	na	hypothetical protein, conserved
ETH_00038240	4	0.3	0.25	1.02	0.24	0.34	1.3	0.26	0.38	2.15	0.18	0.74	1.4	0.53	na	na	na	na	na	na	na
ETH_00010115	1	0.3	na	na	na	na	na	na	na	na	na	0.24	0.8	0.3	na	na	na	na	na	na	hypothetical protein
ETH_00001995	4	0.3	0.52	2.03	0.25	NaN	NaN	NaN	0.53	2.15	0.25	na	na	na	0.04	0.09	0.46	0.56	2.27	0.25	hypothetical protein
ETH_00021970	4	0.3	0.32	1.02	0.31	0.31	1.26	0.24	na	na	na	0.23	1.25	0.19	0.06	0.13	0.46	na	na	na	hypothetical protein
ETH_00022460	1	0.3	na	na	na	na	na	na	na	na	na	na	na	na	0.03	0.1	0.3	NaN	NaN	NaN	gamma-glutamyl hydrolase, putative
ETH_00040135	3	0.3	na	na	na	0.55	1.25	0.44	0.29	1.88	0.15	0.35	1.13	0.31	na	na	na	na	na	na	hypothetical protein
ETH_00000935	4	0.3	0.29	1.49	0.2	na	na	na	0.31	3.52	0.09	na	na	na	0.05	0.15	0.33	0.54	0.91	0.59	hypothetical protein
ETH_00028815	6	0.3	0.48	1.55	0.31	0.49	1.95	0.25	0.51	1.88	0.27	0.47	1.76	0.27	0.03	0.08	0.41	0.48	1.64	0.3	hypothetical protein
ETH_00039115	2	0.3	na	na	na	na	na	na	0.4	1.67	0.24	0.54	1.48	0.37	na	na	na	NaN	NaN	NaN	hypothetical protein, conserved
ETH_00007390	1	0.3	na	na	na	na	na	na	na	na	na	na	na	na	0.03	0.1	0.3	na	na	na	hypothetical protein
ETH_00027495	3	0.3	0.56	2.8	0.2	0.51	1.74	0.29	NaN	NaN	NaN	na	na	na	0.05	0.13	0.41	na	na	na	hypothetical protein
ETH_00027600	3	0.3	0.32	1.34	0.24	NaN	NaN	NaN	NaN	NaN	NaN	0.46	1.75	0.26	0.04	0.11	0.4	na	na	na	hypothetical protein, conserved
ETH_00006685	1	0.3	na	na	na	na	na	na	na	na	na	na	na	na	0.07	0.25	0.3	na	na	na	hypothetical protein
ETH_00040365	4	0.3	0.15	1.23	0.12	0.23	1	0.23	na	na	na	na	na	na	0.75	1.06	0.71	0.16	1.17	0.14	S-adenosyl-methyltransferase mraW, putative
ETH_00000345	1	0.3	na	na	na	na	na	na	na	na	na	na	na	na	0.03	0.1	0.3	na	na	na	hypothetical protein
ETH_00033195	1	0.3	na	na	na	na	na	na	na	na	na	na	na	na	0.11	0.37	0.3	na	na	na	hypothetical protein
ETH_00022555	5	0.3	0.44	1.76	0.25	0.45	1.55	0.29	0.36	2.03	0.18	na	na	na	0.05	0.09	0.53	0.43	1.73	0.25	hypothetical protein, conserved
ETH_00004640	1	0.3	na	na	na	na	na	na	na	na	na	na	na	na	0.05	0.15	0.3	na	na	na	hypothetical protein
ETH_00022435	4	0.3	NaN	NaN	NaN	0.56	2.44	0.23	0.5	3.12	0.16	NaN	NaN	NaN	0.03	0.07	0.46	0.6	1.7	0.35	hypothetical protein
ETH_00015410	3	0.3	0.22	1.62	0.14	0.25	1.18	0.21	NaN	NaN	NaN	na	na	na	0.08	0.15	0.55	NaN	NaN	NaN	hypothetical protein, conserved
ETH_00030180	5	0.3	0.25	1.19	0.21	0.21	0.9	0.24	0.28	1.39	0.2	na	na	na	0.04	0.06	0.7	0.18	1.2	0.15	DNA-dependent RNA polymerase, putative
ETH_00005295	2	0.3	0.3	1.28	0.23	na	na	na	NaN	NaN	NaN	0.25	0.69	0.36	na	na	na	NaN	NaN	NaN	hypothetical protein
ETH_00026445	3	0.3	0.36	1.72	0.21	0.4	1.66	0.24	na	na	na	na	na	na	0.08	0.17	0.45	na	na	na	hypothetical protein
ETH_00016090	4	0.3	0.52	2.37	0.22	0.38	1.77	0.21	0.58	3.78	0.15	na	na	na	0.38	0.63	0.61	na	na	na	corA-like Mg2+ transporter domain-containing protein, putative
ETH_00029080	2	0.3	na	na	na	na	na	na	na	na	na	0.5	3.51	0.14	0.06	0.13	0.46	na	na	na	hypothetical protein
ETH_00039310	5	0.3	0.43	1.79	0.24	0.45	1.3	0.35	0.54	1.76	0.31	0.49	2.01	0.24	0.02	0.07	0.36	na	na	na	na
ETH_00033415	5	0.3	0.39	1.33	0.3	na	na	na	0.53	1.64	0.33	0.38	1.2	0.32	0.03	0.13	0.25	0.5	1.63	0.31	hypothetical protein
ETH_00035400	1	0.3	na	na	na	na	na	na	na	na	na	na	na	na	0.02	0.07	0.3	na	na	na	hypothetical protein
ETH_00022655	6	0.3	0.37	1.87	0.2	0.38	1.58	0.24	0.43	1.41	0.31	0.41	1.42	0.29	0.05	0.1	0.47	0.34	1.22	0.28	hypothetical protein, conserved
ETH_00009050	2	0.3	0.48	1.43	0.33	na	na	na	na	na	na	na	na	na	0.02	0.09	0.26	na	na	na	sulfate transporter, putative
ETH_00007440	5	0.3	0.54	2.08	0.26	na	na	na	0.55	1.76	0.31	0.56	2.18	0.26	0.06	0.15	0.41	0.55	2.14	0.26	hypothetical protein
ETH_00002005	3	0.3	NaN	NaN	NaN	0.74	2.73	0.27	NaN	NaN	NaN	NaN	NaN	NaN	0.04	0.11	0.36	0.68	2.58	0.26	hypothetical protein, conserved
ETH_00034905	1	0.3	na	na	na	na	na	na	na	na	na	na	na	na	0.07	0.23	0.3	na	na	na	sag
ETH_00030310	5	0.3	na	na	na	0.65	2.41	0.27	0.37	2.31	0.16	0.29	0.78	0.38	0.03	0.07	0.39	0.34	1.14	0.3	hypothetical protein
ETH_00042145	3	0.3	0.45	1.61	0.28	0.65	2.14	0.3	na	na	na	NaN	NaN	NaN	0.07	0.23	0.32	na	na	na	hypothetical protein
ETH_00003565	5	0.3	0.35	1.03	0.34	na	na	na	0.35	1.61	0.22	0.19	1.31	0.14	0.04	0.07	0.5	0.45	1.6	0.28	hypothetical protein, conserved
ETH_00003670	1	0.3	NaN	NaN	NaN	NaN	NaN	NaN	na	na	na	na	na	na	0.05	0.18	0.3	na	na	na	hypothetical protein, conserved
ETH_00011955	2	0.3	na	na	na	0.15	1.81	0.09	NaN	NaN	NaN	NaN	NaN	NaN	0.16	0.31	0.51	na	na	na	chromodomain helicase DNA binding protein, putative
ETH_00037310	5	0.3	0.18	1.47	0.12	0.87	2.49	0.35	1.11	3.17	0.35	0.53	1.07	0.5	na	na	na	0.91	5.33	0.17	hypothetical protein, conserved
ETH_00003070	4	0.3	na	na	na	0.38	1.7	0.22	na	na	na	0.36	2.84	0.13	0.14	0.21	0.66	0.41	2.33	0.17	hypothetical protein
ETH_00009125	1	0.3	na	na	na	na	na	na	na	na	na	na	na	na	0.03	0.1	0.3	na	na	na	2-methylbutyryl-CoA dehydrogenase, putative
ETH_00042270	4	0.3	0.28	1.18	0.24	NaN	NaN	NaN	0.22	1.08	0.2	0.37	1.4	0.26	0.23	0.48	0.49	na	na	na	na
ETH_00026485	1	0.3	na	na	na	na	na	na	na	na	na	na	na	na	0.14	0.46	0.3	na	na	na	hypothetical protein
ETH_00008980	3	0.3	na	na	na	0.45	3.44	0.13	NaN	NaN	NaN	0.57	0.78	0.73	0	0.15	0.03	NaN	NaN	NaN	beta-adaptin-like protein, putative
ETH_00009020	5	0.3	0.27	1.08	0.25	0.38	1.48	0.26	NaN	NaN	NaN	0.33	0.82	0.4	0.05	0.15	0.36	0.29	1.28	0.23	hypothetical protein
ETH_00022385	1	0.3	NaN	NaN	NaN	na	na	na	na	na	na	na	na	na	0.04	0.15	0.3	na	na	na	hypothetical protein, conserved
ETH_00002030	5	0.3	0.41	1.88	0.22	0.37	0.9	0.41	0.41	1.7	0.24	0.39	1.92	0.2	0.04	0.1	0.41	NaN	NaN	NaN	hypothetical protein
ETH_00015800	5	0.3	0.49	1.94	0.25	0.53	2.83	0.19	0.54	1.8	0.3	0.4	1.61	0.25	0.14	0.27	0.5	NaN	NaN	NaN	hypothetical protein
ETH_00031325	5	0.3	0.35	1.19	0.3	na	na	na	0.31	1.66	0.19	0.37	1	0.37	0.04	0.14	0.3	0.56	1.68	0.33	hypothetical protein, conserved
ETH_00021815	3	0.3	0.47	1.18	0.4	0.59	1.72	0.34	na	na	na	NaN	NaN	NaN	0.02	0.13	0.15	na	na	na	hypothetical protein
ETH_00040220	5	0.3	0.34	1.98	0.17	0.45	1.52	0.3	0.35	1.04	0.34	0.32	0.99	0.32	0.05	0.13	0.36	NaN	NaN	NaN	hypothetical protein
ETH_00027730	1	0.3	na	na	na	na	na	na	na	na	na	na	na	na	0.05	0.17	0.3	na	na	na	hypothetical protein
ETH_00001380	2	0.3	NaN	NaN	NaN	NaN	NaN	NaN	0.35	2.33	0.15	NaN	NaN	NaN	0.04	0.08	0.45	NaN	NaN	NaN	Pseudouridylate synthase (EC 5.4.99.-), related
ETH_00027630	2	0.3	na	na	na	0.67	2.1	0.32	na	na	na	na	na	na	0.05	0.18	0.27	na	na	na	hypothetical protein
ETH_00021225	4	0.3	0.47	1.95	0.24	0.67	1.79	0.37	NaN	NaN	NaN	na	na	na	0.04	0.18	0.22	0.63	1.8	0.35	acetyltransferase domain-containing protein, putative
ETH_00034660	1	0.3	na	na	na	na	na	na	na	na	na	na	na	na	0.03	0.09	0.3	na	na	na	hypothetical protein
ETH_00028085	2	0.3	na	na	na	0.38	2.15	0.18	na	na	na	na	na	na	0.03	0.08	0.42	na	na	na	hypothetical protein
ETH_00013155	1	0.3	na	na	na	na	na	na	na	na	na	na	na	na	0.03	0.11	0.3	na	na	na	sag
ETH_00031755	4	0.3	0.62	1.67	0.37	0.65	3.39	0.19	0.61	2.38	0.26	na	na	na	0.04	0.11	0.37	NaN	NaN	NaN	hypothetical protein
ETH_00029020	2	0.3	NaN	NaN	NaN	0.31	1.24	0.25	NaN	NaN	NaN	NaN	NaN	NaN	0.03	0.08	0.34	NaN	NaN	NaN	hypothetical protein
ETH_00011195	6	0.3	0.38	1.56	0.25	0.41	1.34	0.31	0.36	1.61	0.22	0.45	1.63	0.27	0.11	0.23	0.5	0.35	1.55	0.23	hypothetical protein
ETH_00009570	6	0.3	0.2	1	0.2	0.12	0.77	0.16	0.17	1.12	0.15	0.13	0.84	0.15	0.02	0.02	0.91	0.21	1.09	0.19	hypothetical protein, conserved
ETH_00020600	5	0.3	0.48	1.63	0.3	0.5	2.34	0.21	0.49	1.52	0.32	na	na	na	0.04	0.12	0.35	0.47	1.59	0.29	hypothetical protein
ETH_00039725	3	0.3	NaN	NaN	NaN	na	na	na	0.57	4.22	0.14	na	na	na	0.06	0.18	0.31	0.71	1.61	0.44	hypothetical protein
ETH_00013440	4	0.3	0.32	1.65	0.19	0.42	1.42	0.3	NaN	NaN	NaN	0.47	1.54	0.3	0.12	0.32	0.39	NaN	NaN	NaN	glucose inhibited division protein A, putative
ETH_00027450	4	0.3	0.43	2.47	0.17	0.98	1.75	0.56	na	na	na	0.58	1.75	0.33	0.02	0.17	0.11	na	na	na	hypothetical protein, conserved
ETH_00022710	1	0.3	na	na	na	na	na	na	na	na	na	na	na	na	0.03	0.1	0.3	na	na	na	hypothetical protein
ETH_00001835	6	0.3	0.5	1.45	0.35	0.46	1.74	0.27	0.48	1.79	0.27	0.32	1.84	0.17	0.04	0.08	0.44	0.47	1.7	0.28	myosin heavy chain, putative
ETH_00014635	1	0.3	na	na	na	na	na	na	na	na	na	na	na	na	0.1	0.35	0.3	na	na	na	hypothetical protein
ETH_00006025	2	0.3	na	na	na	na	na	na	0.15	0.86	0.18	na	na	na	0.07	0.17	0.41	na	na	na	ferredoxin, putative
ETH_00020995	4	0.29	0.42	1.42	0.3	na	na	na	0.43	2.25	0.19	na	na	na	0.04	0.13	0.27	0.47	1.12	0.42	hypothetical protein
ETH_00019100	6	0.29	0.37	1.59	0.23	0.41	1.33	0.31	0.44	1.39	0.31	0.39	1.36	0.29	0.04	0.11	0.34	0.39	1.37	0.29	hypothetical protein
ETH_00019165	1	0.29	na	na	na	na	na	na	na	na	na	na	na	na	0.03	0.09	0.29	na	na	na	hypothetical protein
ETH_00002305	5	0.29	0.58	2.16	0.27	0.65	2.34	0.28	NaN	NaN	NaN	0.54	2.55	0.21	0.05	0.15	0.35	0.8	2.23	0.36	hypothetical protein, conserved
ETH_00003965	1	0.29	na	na	na	na	na	na	na	na	na	na	na	na	0.15	0.52	0.29	na	na	na	esf1 family
ETH_00004295	3	0.29	NaN	NaN	NaN	0.62	2.58	0.24	NaN	NaN	NaN	0.69	1.83	0.38	0.1	0.4	0.26	NaN	NaN	NaN	hypothetical protein
ETH_00015980	2	0.29	NaN	NaN	NaN	0.53	1.68	0.32	na	na	na	na	na	na	0.06	0.22	0.27	na	na	na	hypothetical protein
ETH_00006160	5	0.29	0.35	1.8	0.2	NaN	NaN	NaN	0.51	1.81	0.28	0.44	1.78	0.24	0.1	0.2	0.49	0.49	1.89	0.26	hypothetical protein
ETH_00004805	5	0.29	0.55	2	0.28	0.52	1.92	0.27	na	na	na	0.4	2.35	0.17	0.07	0.13	0.56	0.44	2.28	0.19	hypothetical protein
ETH_00043505	4	0.29	na	na	na	0.4	1.27	0.31	0.33	2.04	0.16	NaN	NaN	NaN	0.04	0.3	0.13	0.73	1.27	0.57	hypothetical protein
ETH_00018875	5	0.29	0.26	0.7	0.37	0.32	1.02	0.32	0.28	1.99	0.14	na	na	na	0.02	0.04	0.4	0.38	1.62	0.24	hypothetical protein
ETH_00025310	4	0.29	0.23	1.08	0.21	na	na	na	na	na	na	0.23	1.17	0.2	0.11	0.3	0.38	0.62	1.61	0.38	hypothetical protein
ETH_00022050	1	0.29	na	na	na	na	na	na	na	na	na	na	na	na	0.04	0.13	0.29	na	na	na	protein phosphatase 2C, putative
ETH_00029870	5	0.29	0.21	0.94	0.22	0.28	1.22	0.23	NaN	NaN	NaN	0.29	0.85	0.34	0.09	0.19	0.51	0.34	2.04	0.16	4-nitrophenylphosphatase, putative
ETH_00001045	4	0.29	0.44	1.63	0.27	0.45	1.58	0.29	NaN	NaN	NaN	0.35	1.77	0.2	0.08	0.19	0.41	na	na	na	AGC kinase, putative
ETH_00004650	3	0.29	NaN	NaN	NaN	0.33	1.31	0.26	na	na	na	0.72	2.15	0.33	0.09	0.31	0.29	na	na	na	hypothetical protein
ETH_00030435	1	0.29	na	na	na	na	na	na	na	na	na	NaN	NaN	NaN	0.1	0.33	0.29	na	na	na	hypothetical protein
ETH_00009345	6	0.29	0.43	1.71	0.25	0.55	1.49	0.37	0.39	1.71	0.23	0.49	1.96	0.25	0.04	0.13	0.29	0.61	1.7	0.36	hypothetical protein
ETH_00002975	2	0.29	NaN	NaN	NaN	0.38	3.37	0.11	NaN	NaN	NaN	na	na	na	0.33	0.7	0.47	NaN	NaN	NaN	hypothetical protein
ETH_00023730	3	0.29	na	na	na	na	na	na	0.38	1.61	0.23	0.52	2.09	0.25	0.07	0.17	0.4	na	na	na	hypothetical protein
ETH_00033025	4	0.29	0.28	0.9	0.31	0.38	0.82	0.46	0.3	1.36	0.22	na	na	na	0.02	0.14	0.18	na	na	na	hypothetical protein
ETH_00022325	4	0.29	0.42	1.36	0.31	0.33	1.85	0.18	0.43	1.54	0.28	na	na	na	0.04	0.1	0.4	na	na	na	hypothetical protein
ETH_00037335	5	0.29	0.37	1.68	0.22	0.29	1.46	0.2	0.33	1.28	0.26	na	na	na	0.07	0.16	0.4	0.91	2.34	0.39	hypothetical protein
ETH_00000300	1	0.29	NaN	NaN	NaN	0.77	2.64	0.29	na	na	na	na	na	na	na	na	na	na	na	na	hypothetical protein, conserved
ETH_00038460	2	0.29	0.35	1.45	0.24	NaN	NaN	NaN	NaN	NaN	NaN	0.5	1.48	0.34	na	na	na	NaN	NaN	NaN	hypothetical protein
ETH_00019890	4	0.29	0.49	1.75	0.28	NaN	NaN	NaN	0.43	2.07	0.21	na	na	na	0.05	0.11	0.47	0.34	1.57	0.22	hypothetical protein
ETH_00024555	4	0.29	0.47	1.71	0.27	0.38	1.41	0.27	na	na	na	na	na	na	0.06	0.18	0.34	0.47	1.62	0.29	zinc finger, ZZ type domain-containing protein, putative
ETH_00026125	2	0.29	na	na	na	0.25	1.82	0.14	NaN	NaN	NaN	na	na	na	0.06	0.13	0.45	na	na	na	hypothetical protein
ETH_00032645	2	0.29	NaN	NaN	NaN	0.32	2.33	0.14	NaN	NaN	NaN	na	na	na	0.13	0.28	0.45	na	na	na	chorismate synthase, putative
ETH_00013420	2	0.29	0.53	1.36	0.39	na	na	na	na	na	na	na	na	na	0.02	0.08	0.2	na	na	na	hypothetical protein
ETH_00040805	3	0.29	0.57	1.89	0.3	0.42	2.37	0.18	na	na	na	0.37	0.94	0.4	na	na	na	na	na	na	na
ETH_00028855	1	0.29	NaN	NaN	NaN	na	na	na	na	na	na	na	na	na	0.03	0.11	0.29	na	na	na	hypothetical protein
ETH_00027610	4	0.29	0.3	3.02	0.1	0.84	2.44	0.34	NaN	NaN	NaN	na	na	na	0.04	0.21	0.2	0.91	1.73	0.53	hypothetical protein, conserved
ETH_00010695	4	0.29	0.29	1.87	0.16	0.66	1.21	0.55	na	na	na	na	na	na	0.01	0.21	0.05	0.53	1.28	0.41	hypothetical protein, conserved
ETH_00031945	6	0.29	0.36	1.25	0.29	0.5	1.28	0.39	0.5	1.3	0.38	0.36	1.15	0.32	0.01	0.06	0.15	0.45	1.97	0.23	hypothetical protein
ETH_00012430	4	0.29	0.38	2.12	0.18	0.6	2	0.3	0.38	1.55	0.25	na	na	na	0.04	0.08	0.44	na	na	na	hypothetical protein
ETH_00026680	5	0.29	0.46	1.54	0.3	0.44	1.36	0.33	0.47	1.73	0.27	na	na	na	0.05	0.16	0.28	0.54	2	0.27	hypothetical protein
ETH_00029830	3	0.29	0.56	1.92	0.29	na	na	na	NaN	NaN	NaN	na	na	na	0.05	0.22	0.25	0.71	2.16	0.33	F-box domain-containing protein, putative
ETH_00015845	4	0.29	0.44	1.69	0.26	0.4	1.76	0.23	0.48	1.53	0.31	na	na	na	0.04	0.11	0.37	na	na	na	hypothetical protein
ETH_00016215	4	0.29	0.48	1.65	0.29	0.39	1.43	0.27	na	na	na	0.87	2.98	0.29	0.04	0.11	0.31	NaN	NaN	NaN	hypothetical protein
ETH_00011880	3	0.29	0.48	2.12	0.22	na	na	na	0.6	1.64	0.37	na	na	na	na	na	na	0.45	1.6	0.28	hypothetical protein, conserved
ETH_00013750	1	0.29	na	na	na	na	na	na	na	na	na	na	na	na	0.08	0.28	0.29	na	na	na	hypothetical protein
ETH_00034880	1	0.29	na	na	na	na	na	na	na	na	na	na	na	na	0.05	0.17	0.29	na	na	na	sag
ETH_00012490	4	0.29	0.42	1.33	0.32	na	na	na	0.49	1.38	0.36	na	na	na	0.03	0.13	0.27	0.65	2.9	0.22	hypothetical protein
ETH_00011225	1	0.29	na	na	na	na	na	na	na	na	na	na	na	na	0.05	0.18	0.29	na	na	na	glycine cleavage system H protein, putative
ETH_00038745	3	0.29	0.37	1.89	0.2	0.27	0.78	0.34	na	na	na	na	na	na	0.16	0.5	0.33	na	na	na	na
ETH_00025640	6	0.29	0.33	1.37	0.24	0.38	1.55	0.24	0.35	1.47	0.24	0.36	1.69	0.22	0.14	0.24	0.58	0.31	1.35	0.23	thrombospondin type 1 domain-containing protein, putative
ETH_00014605	3	0.29	na	na	na	0.38	3.65	0.1	1.22	2.61	0.47	NaN	NaN	NaN	0.02	0.08	0.3	na	na	na	hypothetical protein
ETH_00031400	1	0.29	na	na	na	na	na	na	na	na	na	na	na	na	0.07	0.24	0.29	na	na	na	hypothetical protein
ETH_00009940	1	0.29	na	na	na	na	na	na	na	na	na	na	na	na	0.12	0.41	0.29	na	na	na	proteasome PCI domain-containing protein, putative
ETH_00008675	1	0.29	na	na	na	na	na	na	na	na	na	na	na	na	0.09	0.31	0.29	na	na	na	sag
ETH_00026900	1	0.29	NaN	NaN	NaN	na	na	na	NaN	NaN	NaN	NaN	NaN	NaN	0.03	0.11	0.29	na	na	na	ribosomal protein S15, putative
ETH_00035750	3	0.29	0.7	2.22	0.32	0.23	1.58	0.15	NaN	NaN	NaN	0.94	2.32	0.41	na	na	na	na	na	na	Large protein with 8 or more transmembrane domains within NH2 region, related
ETH_00026295	3	0.29	0.26	3.8	0.07	0.17	1.35	0.12	NaN	NaN	NaN	na	na	na	0.27	0.39	0.68	na	na	na	SCO1/SenC domain-containing protein, putative
ETH_00014190	6	0.29	0.37	1.33	0.28	0.36	1.44	0.25	0.39	1.49	0.26	0.36	1.5	0.24	0.04	0.1	0.43	0.37	1.34	0.27	Proteophosphoglycan ppg4, related
ETH_00003200	4	0.29	0.4	3.49	0.11	0.29	2.04	0.14	na	na	na	0.72	1.41	0.51	0.12	0.31	0.39	na	na	na	hypothetical protein
ETH_00005825	3	0.29	0.29	1.32	0.22	0.27	1.6	0.17	NaN	NaN	NaN	na	na	na	0.05	0.11	0.48	na	na	na	hypothetical protein, conserved
ETH_00004215	2	0.29	NaN	NaN	NaN	na	na	na	na	na	na	0.59	1.87	0.32	0.03	0.13	0.26	na	na	na	hypothetical protein
ETH_00042470	2	0.29	0.58	1.6	0.36	na	na	na	NaN	NaN	NaN	na	na	na	0.1	0.44	0.22	na	na	na	hypothetical protein
ETH_00007705	3	0.29	NaN	NaN	NaN	0.43	2.33	0.18	0.54	1.71	0.31	na	na	na	0.24	0.64	0.37	na	na	na	hypothetical protein, conserved
ETH_00007690	1	0.29	na	na	na	na	na	na	na	na	na	na	na	na	0.04	0.13	0.29	na	na	na	hypothetical protein, conserved
ETH_00026120	3	0.29	0.36	2.47	0.15	0.23	1.22	0.19	NaN	NaN	NaN	na	na	na	0.07	0.13	0.53	na	na	na	hypothetical protein
ETH_00002225	1	0.29	na	na	na	na	na	na	na	na	na	na	na	na	0.06	0.2	0.29	na	na	na	hypothetical protein
ETH_00038735	2	0.29	NaN	NaN	NaN	0.99	1.81	0.55	NaN	NaN	NaN	NaN	NaN	NaN	0.01	0.18	0.03	na	na	na	hypothetical protein
ETH_00039450	2	0.29	na	na	na	0.26	2.16	0.12	na	na	na	na	na	na	0.02	0.05	0.46	na	na	na	hypothetical protein, conserved
ETH_00017910	4	0.29	0.53	2.63	0.2	0.62	1.5	0.41	NaN	NaN	NaN	0.59	2.13	0.28	0.03	0.13	0.27	na	na	na	hypothetical protein
ETH_00032445	1	0.29	na	na	na	0.4	1.4	0.29	na	na	na	NaN	NaN	NaN	na	na	na	na	na	na	hypothetical protein
ETH_00013930	3	0.29	NaN	NaN	NaN	0.56	1.87	0.3	0.61	2.42	0.25	na	na	na	na	na	na	0.93	2.89	0.32	hypothetical protein, conserved
ETH_00008035	4	0.29	na	na	na	0.16	0.99	0.16	na	na	na	0.32	1.74	0.18	0.88	1.46	0.6	0.27	1.28	0.21	hypothetical protein
ETH_00018455	1	0.29	na	na	na	na	na	na	na	na	na	na	na	na	0.04	0.13	0.29	na	na	na	hypothetical protein
ETH_00041350	5	0.29	0.26	1.54	0.17	0.43	1.38	0.31	0.26	2.91	0.09	na	na	na	0.11	0.18	0.65	0.35	1.51	0.23	hypothetical protein, conserved
ETH_00014940	1	0.29	na	na	na	na	na	na	na	na	na	na	na	na	0.05	0.16	0.29	na	na	na	hypothetical protein
ETH_00004350	3	0.29	NaN	NaN	NaN	0.84	2.43	0.35	0.45	1.18	0.38	na	na	na	0.02	0.17	0.14	na	na	na	proteasome PCI domain-containing protein, putative
ETH_00020575	1	0.29	na	na	na	NaN	NaN	NaN	na	na	na	na	na	na	0.15	0.51	0.29	na	na	na	hypothetical protein
ETH_00020040	5	0.29	0.46	1.77	0.26	na	na	na	0.41	2.1	0.2	0.47	1.8	0.26	0.07	0.13	0.51	0.47	2.24	0.21	hypothetical protein
ETH_00007470	4	0.29	0.45	1.37	0.33	NaN	NaN	NaN	0.45	1.55	0.29	na	na	na	0.03	0.13	0.23	0.46	1.52	0.3	hypothetical protein
ETH_00021355	5	0.29	0.43	1.66	0.26	0.33	1.1	0.3	0.43	1.5	0.29	na	na	na	0.03	0.13	0.27	0.46	1.43	0.32	hypothetical protein
ETH_00031935	4	0.29	0.42	1.96	0.21	na	na	na	NaN	NaN	NaN	0.5	1.37	0.37	0.03	0.09	0.29	0.47	1.72	0.28	protein kinase, putative
ETH_00005685	1	0.29	na	na	na	na	na	na	na	na	na	na	na	na	0.05	0.16	0.29	na	na	na	hypothetical protein
ETH_00019110	6	0.29	0.37	1.26	0.3	0.39	1.63	0.24	0.43	1.82	0.23	0.35	1.47	0.23	0.05	0.09	0.51	0.35	1.65	0.21	hypothetical protein, conserved
ETH_00032495	2	0.29	na	na	na	0.56	1.7	0.33	0.47	1.87	0.25	na	na	na	na	na	na	na	na	na	hypothetical protein
ETH_00009165	6	0.29	0.36	1.07	0.34	0.44	1.23	0.36	0.34	1.48	0.23	0.49	1.3	0.38	0.04	0.13	0.26	0.48	3.01	0.16	hypothetical protein
ETH_00043875	2	0.29	0.22	1.21	0.18	NaN	NaN	NaN	na	na	na	na	na	na	0.85	2.17	0.39	NaN	NaN	NaN	hypothetical protein
ETH_00027150	3	0.29	0.48	2.13	0.22	0.55	2.31	0.24	na	na	na	na	na	na	0.11	0.29	0.4	na	na	na	hypothetical protein, conserved
ETH_00011530	3	0.29	0.35	2.19	0.16	0.7	3.54	0.2	NaN	NaN	NaN	na	na	na	0.17	0.34	0.5	NaN	NaN	NaN	asparaginase, putative
ETH_00025270	1	0.29	na	na	na	na	na	na	na	na	na	na	na	na	0.02	0.08	0.29	na	na	na	hypothetical protein
ETH_00020615	1	0.29	na	na	na	na	na	na	na	na	na	na	na	na	0.04	0.15	0.29	na	na	na	hypothetical protein
ETH_00004755	5	0.29	0.41	1.5	0.27	NaN	NaN	NaN	0.41	1.72	0.24	0.38	1.5	0.26	0.04	0.09	0.46	0.35	1.63	0.21	hypothetical protein, conserved
ETH_00004140	3	0.29	0.53	2.05	0.26	NaN	NaN	NaN	NaN	NaN	NaN	0.53	2.07	0.26	0.04	0.12	0.34	na	na	na	hypothetical protein
ETH_00034360	1	0.29	NaN	NaN	NaN	NaN	NaN	NaN	NaN	NaN	NaN	NaN	NaN	NaN	0.05	0.17	0.29	NaN	NaN	NaN	hypothetical protein, conserved
ETH_00034785	1	0.29	NaN	NaN	NaN	na	na	na	na	na	na	na	na	na	0.03	0.09	0.29	NaN	NaN	NaN	DNA mismatch repair protein, putative
ETH_00028190	5	0.29	NaN	NaN	NaN	0.67	2.21	0.31	0.62	2.23	0.28	0.65	3.11	0.21	0.04	0.12	0.34	0.76	2.5	0.3	hypothetical protein
ETH_00004560	4	0.29	0.53	1.62	0.33	NaN	NaN	NaN	0.5	2.25	0.22	0.38	1.83	0.21	0.08	0.2	0.39	NaN	NaN	NaN	hypothetical protein
ETH_00026905	5	0.29	0.44	1.42	0.31	0.4	2.02	0.2	0.49	2.05	0.24	na	na	na	0.04	0.11	0.4	0.5	1.74	0.29	hypothetical protein
ETH_00018740	1	0.29	0.52	1.81	0.29	na	na	na	NaN	NaN	NaN	na	na	na	na	na	na	na	na	na	vacuolar protein sorting-associated protein, putative
ETH_00018995	5	0.29	0.66	3.65	0.18	0.6	1.84	0.33	0.66	2.23	0.29	NaN	NaN	NaN	0.04	0.09	0.45	0.58	3.25	0.18	hypothetical protein
ETH_00016165	6	0.29	0.58	3.74	0.15	0.49	1.66	0.29	0.49	1.92	0.26	0.88	1.56	0.56	0.03	0.12	0.22	0.7	3	0.23	hypothetical protein, conserved
ETH_00013195	5	0.29	0.37	1.59	0.23	NaN	NaN	NaN	0.27	1.91	0.14	0.33	1.39	0.24	0.02	0.1	0.24	1.18	2.04	0.58	FK506-binding nuclear protein, putative
ETH_00011125	4	0.29	0.32	1.23	0.26	0.36	1.47	0.24	0.35	1.42	0.25	na	na	na	0.05	0.12	0.4	na	na	na	hypothetical protein
ETH_00006115	5	0.29	0.44	1.68	0.26	0.81	2.48	0.33	0.5	1.83	0.27	na	na	na	0.04	0.13	0.3	0.49	1.83	0.27	hypothetical protein
ETH_00020100	2	0.29	na	na	na	0.54	1.64	0.33	NaN	NaN	NaN	na	na	na	0.07	0.3	0.24	na	na	na	hypothetical protein
ETH_00001690	3	0.29	na	na	na	na	na	na	0.71	2.09	0.34	0.71	3.58	0.2	0.08	0.24	0.32	na	na	na	hypothetical protein
ETH_00004285	5	0.29	0.41	1.54	0.27	0.38	1.77	0.22	0.42	1.4	0.3	na	na	na	0.04	0.13	0.3	0.54	1.55	0.35	hypothetical protein
ETH_00005420	2	0.29	0.3	1.31	0.23	na	na	na	na	na	na	na	na	na	0.04	0.11	0.34	na	na	na	hemolysin, putative
ETH_00032225	6	0.29	0.4	1.64	0.25	0.33	1.32	0.25	0.26	2.09	0.13	0.29	1.27	0.23	0.29	0.45	0.65	0.35	1.72	0.21	autophagy protein, putative
ETH_00014615	3	0.29	na	na	na	0.47	1.21	0.39	NaN	NaN	NaN	0.32	1.46	0.22	0.05	0.22	0.25	na	na	na	hypothetical protein
ETH_00002500	6	0.29	0.31	1.03	0.3	0.32	1.35	0.24	0.41	1.17	0.35	0.4	2.72	0.15	0.04	0.11	0.36	0.3	0.98	0.31	hypothetical protein
ETH_00007700	2	0.29	na	na	na	na	na	na	na	na	na	na	na	na	0.07	0.16	0.43	0.63	4.48	0.14	hypothetical protein
ETH_00029125	1	0.29	NaN	NaN	NaN	NaN	NaN	NaN	na	na	na	na	na	na	0.03	0.11	0.29	na	na	na	hypothetical protein, conserved
ETH_00017135	6	0.29	0.43	1.59	0.27	0.38	1.54	0.25	0.42	1.6	0.26	0.43	1.42	0.31	0.05	0.15	0.35	0.42	1.5	0.28	hypothetical protein, conserved
ETH_00005820	5	0.29	0.23	1.04	0.22	0.19	1.12	0.17	0.22	1.72	0.13	0.35	1.29	0.27	0.1	0.16	0.63	na	na	na	WD domain, G-beta repeat-containing protein, putative
ETH_00021460	2	0.29	0.71	2.65	0.27	na	na	na	na	na	na	na	na	na	0.02	0.08	0.3	na	na	na	serine protease inhibitor dipetalogastin precursor, putative
ETH_00029190	4	0.28	na	na	na	0.4	1.58	0.25	na	na	na	0.5	1.74	0.29	0.03	0.09	0.37	0.4	1.74	0.23	protein phosphatase 2C, putative
ETH_00023745	2	0.28	na	na	na	na	na	na	na	na	na	na	na	na	0.07	0.18	0.37	0.4	1.99	0.2	hypothetical protein
ETH_00012280	6	0.28	0.53	1.56	0.34	0.38	1.83	0.21	0.43	1.82	0.24	0.39	1.64	0.24	0.04	0.11	0.42	0.42	1.55	0.27	hypothetical protein
ETH_00023740	2	0.28	na	na	na	0.3	1.51	0.2	na	na	na	na	na	na	0.09	0.24	0.37	na	na	na	protein kinase (incomplete catalytic triad), putative
ETH_00017720	5	0.28	0.38	1.87	0.2	0.44	1.05	0.41	0.62	2.6	0.24	0.6	1.5	0.4	0.03	0.19	0.17	NaN	NaN	NaN	hypothetical protein
ETH_00025745	3	0.28	0.5	1.47	0.34	0.45	1.33	0.34	na	na	na	na	na	na	0.03	0.16	0.18	na	na	na	hypothetical protein
ETH_00005960	3	0.28	0.29	1.63	0.18	na	na	na	0.49	1.67	0.29	na	na	na	0.11	0.28	0.38	na	na	na	hypothetical protein
ETH_00017835	1	0.28	na	na	na	na	na	na	na	na	na	na	na	na	0.03	0.09	0.28	NaN	NaN	NaN	hypothetical protein, conserved
ETH_00027100	2	0.28	NaN	NaN	NaN	0.5	1.66	0.3	na	na	na	na	na	na	0.02	0.09	0.27	na	na	na	hypothetical protein, conserved
ETH_00017790	5	0.28	0.29	1.2	0.24	0.34	1.14	0.3	0.31	1.6	0.2	na	na	na	0.12	0.25	0.48	0.4	1.9	0.21	hypothetical protein
ETH_00006215	3	0.28	NaN	NaN	NaN	0.47	1.5	0.31	NaN	NaN	NaN	0.52	1.5	0.35	0.04	0.2	0.19	NaN	NaN	NaN	hypothetical protein, conserved
ETH_00017845	1	0.28	na	na	na	na	na	na	na	na	na	na	na	na	0.04	0.14	0.28	na	na	na	hypothetical protein
ETH_00019215	4	0.28	0.33	1.15	0.29	0.35	1.11	0.32	na	na	na	0.31	1.77	0.18	0.03	0.09	0.35	na	na	na	hypothetical protein, conserved
ETH_00027720	5	0.28	0.5	1.38	0.36	na	na	na	0.43	1.99	0.22	0.41	1.94	0.21	0.02	0.09	0.23	0.39	0.98	0.4	hypothetical protein, conserved
ETH_00021680	1	0.28	na	na	na	na	na	na	na	na	na	na	na	na	0.03	0.12	0.28	na	na	na	hypothetical protein
ETH_00019875	5	0.28	0.48	1.76	0.27	0.53	1.35	0.39	0.51	1.99	0.26	NaN	NaN	NaN	0.03	0.13	0.27	0.51	2.17	0.24	hypothetical protein
ETH_00030705	4	0.28	0.5	4.95	0.1	0.46	2.12	0.22	na	na	na	na	na	na	0.05	0.14	0.37	0.59	1.34	0.44	hypothetical protein
ETH_00001425	5	0.28	na	na	na	0.63	2.09	0.3	1.02	2.55	0.4	0.51	1.96	0.26	0.03	0.11	0.31	0.53	3.62	0.15	hypothetical protein, conserved
ETH_00033445	2	0.28	na	na	na	0.43	1.87	0.23	na	na	na	0.35	1.03	0.34	na	na	na	NaN	NaN	NaN	hypothetical protein
ETH_00040495	2	0.28	0.35	1.64	0.22	na	na	na	0.47	1.34	0.35	na	na	na	na	na	na	na	na	na	hypothetical protein, conserved
ETH_00005375	6	0.28	0.39	0.98	0.4	0.45	2.11	0.22	0.46	1.55	0.3	0.34	1.76	0.2	0.06	0.18	0.32	0.32	1.16	0.27	hypothetical protein
ETH_00006930	6	0.28	0.44	1.78	0.25	0.47	2.36	0.2	0.47	1.83	0.26	0.45	2.56	0.18	0.07	0.13	0.54	0.42	1.48	0.28	hypothetical protein, conserved
ETH_00007765	4	0.28	na	na	na	0.4	1.37	0.29	0.39	1.74	0.22	0.46	1.39	0.33	na	na	na	0.49	1.71	0.29	hypothetical protein
ETH_00021910	6	0.28	0.35	1.32	0.26	0.43	1.12	0.39	0.36	1.23	0.29	0.34	1.48	0.23	0.04	0.1	0.38	0.38	2.51	0.15	hypothetical protein
ETH_00042545	1	0.28	na	na	na	na	na	na	na	na	na	na	na	na	0.13	0.48	0.28	na	na	na	ABC transporter protein, putative
ETH_00009665	1	0.28	na	na	na	na	na	na	na	na	na	na	na	na	0.04	0.14	0.28	na	na	na	hypothetical protein
ETH_00005785	1	0.28	na	na	na	na	na	na	na	na	na	na	na	na	0.03	0.1	0.28	na	na	na	hypothetical protein
ETH_00030210	4	0.28	0.31	1.2	0.26	0.4	1.04	0.38	na	na	na	0.41	1.24	0.33	0.01	0.08	0.16	na	na	na	hypothetical protein
ETH_00032150	6	0.28	0.41	1.7	0.24	0.42	2.5	0.17	0.53	3.62	0.15	0.44	1.96	0.23	0.08	0.11	0.67	0.43	1.79	0.24	hypothetical protein
ETH_00022665	5	0.28	na	na	na	0.34	1.88	0.18	0.47	2.09	0.23	0.37	1.78	0.21	0.06	0.11	0.58	0.46	2.1	0.22	calnexin, putative
ETH_00029655	4	0.28	na	na	na	0.42	1.3	0.32	0.52	2.95	0.18	NaN	NaN	NaN	0.04	0.13	0.32	0.65	2.1	0.31	hypothetical protein
ETH_00006640	4	0.28	0.44	2.65	0.16	0.45	1.2	0.38	0.48	2.41	0.2	NaN	NaN	NaN	0.04	0.11	0.39	NaN	NaN	NaN	hypothetical protein
ETH_00018355	2	0.28	na	na	na	na	na	na	na	na	na	0.28	1.79	0.16	0.04	0.1	0.41	na	na	na	hypothetical protein, conserved
ETH_00014805	4	0.28	0.72	2.92	0.25	0.74	3.34	0.22	0.7	1.89	0.37	NaN	NaN	NaN	0.05	0.16	0.29	NaN	NaN	NaN	hypothetical protein
ETH_00008290	3	0.28	0.26	2.12	0.12	0.2	2.38	0.08	NaN	NaN	NaN	na	na	na	0.18	0.27	0.64	na	na	na	hypothetical protein, conserved
ETH_00036735	4	0.28	0.44	1.35	0.32	0.33	1.12	0.3	na	na	na	0.25	1.12	0.23	0.14	0.49	0.28	NaN	NaN	NaN	hypothetical protein
ETH_00010305	3	0.28	0.29	1.47	0.2	0.37	2.22	0.17	NaN	NaN	NaN	na	na	na	0.11	0.23	0.48	na	na	na	helix-hairpin-helix motif-containing protein, putative
ETH_00005055	3	0.28	NaN	NaN	NaN	0.29	1.59	0.19	NaN	NaN	NaN	0.8	1.51	0.53	0.03	0.24	0.13	na	na	na	calcium/calmodulin-dependent 3',5'-cyclic nucleotide phosphodiesterase, putative
ETH_00018785	1	0.28	NaN	NaN	NaN	NaN	NaN	NaN	NaN	NaN	NaN	na	na	na	0.1	0.35	0.28	NaN	NaN	NaN	hypothetical protein
ETH_00012650	1	0.28	na	na	na	NaN	NaN	NaN	na	na	na	na	na	na	0.05	0.19	0.28	na	na	na	hypothetical protein
ETH_00030675	4	0.28	0.43	1.16	0.37	0.27	1.16	0.23	NaN	NaN	NaN	0.3	1.39	0.22	0.04	0.13	0.3	NaN	NaN	NaN	hypothetical protein
ETH_00001430	4	0.28	0.39	1.58	0.25	na	na	na	0.49	2.79	0.18	na	na	na	0.05	0.09	0.55	0.28	1.93	0.15	hypothetical protein
ETH_00020805	4	0.28	0.49	2.76	0.18	NaN	NaN	NaN	0.48	2.26	0.21	na	na	na	0.05	0.11	0.42	0.44	1.42	0.31	hypothetical protein
ETH_00040310	4	0.28	na	na	na	0.41	2.26	0.18	0.42	2.28	0.19	na	na	na	0.13	0.25	0.51	0.35	1.46	0.24	na
ETH_00043460	5	0.28	0.33	2.12	0.15	na	na	na	0.78	2.72	0.29	0.78	2.43	0.32	0.02	0.09	0.23	0.84	2	0.42	GTPase regulator, putative
ETH_00028300	3	0.28	na	na	na	0.27	1.43	0.19	0.34	1.3	0.26	1.11	2.82	0.4	na	na	na	na	na	na	hypothetical protein
ETH_00018915	3	0.28	NaN	NaN	NaN	na	na	na	na	na	na	0.82	1.77	0.46	0.03	0.14	0.23	0.48	3.25	0.15	RNA pseudouridylate synthase domain-containing protein, putative
ETH_00029440	4	0.28	0.43	1.18	0.36	0.37	1.89	0.2	0.52	1.52	0.34	na	na	na	na	na	na	0.45	2.02	0.22	hypothetical protein
ETH_00041080	3	0.28	0.16	3.13	0.05	1.15	1.72	0.67	0.34	2.79	0.12	na	na	na	na	na	na	na	na	na	na
ETH_00026690	1	0.28	NaN	NaN	NaN	NaN	NaN	NaN	na	na	na	na	na	na	0.04	0.15	0.28	na	na	na	hypothetical protein
ETH_00007480	6	0.28	0.42	1.93	0.22	0.38	1.79	0.21	0.45	1.7	0.27	0.4	1.87	0.21	0.06	0.12	0.49	0.53	1.88	0.28	hypothetical protein
ETH_00020460	5	0.28	na	na	na	0.42	1.87	0.22	0.43	1.65	0.26	0.37	1.59	0.23	0.04	0.11	0.38	0.46	1.52	0.3	hypothetical protein, conserved
ETH_00001865	3	0.28	0.41	3.34	0.12	na	na	na	na	na	na	0.52	1.41	0.37	0.1	0.28	0.35	na	na	na	PBS lyase HEAT-like repeat domain-containing protein, putative
ETH_00024620	2	0.28	na	na	na	0.46	1.52	0.3	na	na	na	na	na	na	0.05	0.19	0.26	na	na	na	ERYTHROCYTE MEMBRANE PROTEIN PFEMP3, related
ETH_00029715	2	0.28	NaN	NaN	NaN	NaN	NaN	NaN	NaN	NaN	NaN	0.23	1.93	0.12	0.03	0.06	0.44	NaN	NaN	NaN	hypothetical protein
ETH_00023505	1	0.28	na	na	na	na	na	na	na	na	na	na	na	na	0.04	0.15	0.28	na	na	na	hypothetical protein
ETH_00010245	1	0.28	na	na	na	na	na	na	na	na	na	na	na	na	0.05	0.18	0.28	na	na	na	hypothetical protein
ETH_00022240	3	0.28	na	na	na	0.23	0.99	0.23	na	na	na	0.17	1.09	0.16	0.15	0.32	0.45	NaN	NaN	NaN	hypothetical protein, conserved
ETH_00008270	5	0.28	0.3	1.61	0.19	0.37	1.37	0.27	na	na	na	0.39	1.28	0.3	0.04	0.1	0.44	0.39	2.01	0.2	hypothetical protein, conserved
ETH_00014285	4	0.28	0.27	1.56	0.17	0.24	1.35	0.18	na	na	na	na	na	na	0.03	0.05	0.46	0.4	1.29	0.31	hypothetical protein
ETH_00003095	5	0.28	0.32	1.33	0.24	0.46	1.04	0.44	0.3	1.94	0.15	0.46	1.15	0.4	na	na	na	0.4	2.43	0.17	hypothetical protein
ETH_00033150	5	0.28	0.41	1.31	0.31	0.52	2.83	0.18	0.36	1.61	0.22	na	na	na	0.06	0.15	0.41	0.4	1.43	0.28	hypothetical protein
ETH_00015150	2	0.28	na	na	na	0.3	1.35	0.22	na	na	na	0.32	0.95	0.34	na	na	na	na	na	na	AROM polypeptide/ shikimate-quinate 5-dehydrogenase, putative
ETH_00015315	5	0.28	0.56	2.1	0.26	0.52	1.94	0.27	0.63	2.55	0.25	0.64	2.95	0.22	0.04	0.11	0.4	NaN	NaN	NaN	hypothetical protein
ETH_00001025	2	0.28	na	na	na	0.48	2.23	0.21	na	na	na	na	na	na	0.07	0.21	0.34	na	na	na	hypothetical protein
ETH_00020940	2	0.28	0.47	2.89	0.16	na	na	na	na	na	na	na	na	na	0.06	0.16	0.4	na	na	na	hypothetical protein
ETH_00014595	6	0.28	0.37	1.39	0.27	0.5	1.37	0.36	0.33	1.6	0.21	0.35	1.99	0.18	0.06	0.15	0.39	0.42	1.58	0.27	hypothetical protein
ETH_00013060	5	0.28	0.29	1.23	0.23	na	na	na	0.35	1.53	0.23	0.29	1.59	0.18	0.05	0.1	0.51	0.31	1.31	0.24	hypothetical protein, conserved
ETH_00032835	1	0.28	na	na	na	na	na	na	na	na	na	na	na	na	0.12	0.44	0.28	na	na	na	hypothetical protein
ETH_00042180	3	0.28	0.36	2.62	0.14	na	na	na	na	na	na	na	na	na	0.04	0.17	0.25	0.47	1.04	0.45	na
ETH_00029285	1	0.28	na	na	na	na	na	na	na	na	na	na	na	na	0.03	0.11	0.28	na	na	na	hypothetical protein
ETH_00032885	5	0.28	0.5	2.74	0.18	0.5	1.17	0.43	0.59	1.91	0.31	0.26	2.3	0.11	0.02	0.07	0.36	NaN	NaN	NaN	hypothetical protein
ETH_00026330	2	0.28	NaN	NaN	NaN	0.1	2.01	0.05	NaN	NaN	NaN	na	na	na	0.11	0.22	0.51	na	na	na	importin alpha, putative
ETH_00019365	1	0.28	na	na	na	na	na	na	na	na	na	na	na	na	0.03	0.11	0.28	na	na	na	hypothetical protein
ETH_00027620	5	0.28	0.5	1.8	0.28	0.51	2.02	0.25	NaN	NaN	NaN	0.63	1.71	0.37	0.04	0.27	0.14	0.73	2.05	0.35	hypothetical protein, conserved
ETH_00012550	1	0.28	na	na	na	na	na	na	na	na	na	na	na	na	0.06	0.22	0.28	na	na	na	hypothetical protein
ETH_00029875	2	0.28	NaN	NaN	NaN	na	na	na	NaN	NaN	NaN	0.37	1.8	0.21	0.02	0.05	0.35	na	na	na	hypothetical protein, conserved
ETH_00021650	5	0.28	0.49	1.96	0.25	0.56	1.42	0.39	0.53	3.35	0.16	na	na	na	0.06	0.14	0.46	0.13	1.04	0.12	hypothetical protein
ETH_00006805	6	0.28	0.41	1.97	0.21	0.35	1.49	0.24	0.38	1.6	0.24	0.39	1.42	0.27	0.04	0.09	0.47	0.31	1.26	0.24	hypothetical protein, conserved
ETH_00023205	5	0.28	0.34	1.38	0.24	0.56	1.56	0.36	0.4	1.41	0.28	na	na	na	0.03	0.09	0.3	0.44	2.23	0.2	hypothetical protein
ETH_00036675	5	0.28	0.35	1.52	0.23	0.31	1.7	0.18	0.53	1.65	0.32	0.37	1.28	0.29	0.11	0.3	0.37	NaN	NaN	NaN	na
ETH_00031030	4	0.28	na	na	na	0.48	1.3	0.37	0.4	2.21	0.18	na	na	na	0.03	0.08	0.35	0.26	1.26	0.21	hypothetical protein
ETH_00015935	3	0.28	na	na	na	0.42	1.47	0.29	na	na	na	0.5	1.52	0.33	0.02	0.1	0.22	na	na	na	hypothetical protein, conserved
ETH_00012595	3	0.28	0.49	1.43	0.34	0.5	1.87	0.27	NaN	NaN	NaN	na	na	na	0.03	0.13	0.22	NaN	NaN	NaN	hypothetical protein
ETH_00001440	4	0.28	0.52	1.56	0.33	0.67	1.95	0.35	na	na	na	na	na	na	0.03	0.15	0.2	0.48	2.08	0.23	hypothetical protein
ETH_00039265	5	0.28	0.31	1.16	0.27	0.35	1.16	0.3	0.42	1.69	0.25	0.43	1.27	0.34	0.03	0.12	0.23	na	na	na	hypothetical protein, conserved
ETH_00025205	5	0.28	0.31	2.96	0.1	0.27	1.43	0.19	0.58	1.86	0.31	0.9	2.09	0.43	0.05	0.14	0.35	NaN	NaN	NaN	hypothetical protein
ETH_00033430	5	0.28	na	na	na	0.24	1.29	0.19	0.34	1.45	0.24	0.28	1.22	0.23	0.05	0.12	0.44	0.39	1.3	0.3	hypothetical protein
ETH_00022070	2	0.28	na	na	na	na	na	na	0.2	1.58	0.12	na	na	na	0.11	0.26	0.43	NaN	NaN	NaN	hypothetical protein, conserved
ETH_00040540	3	0.28	0.34	1.47	0.23	0.35	1.23	0.29	na	na	na	na	na	na	na	na	na	0.59	1.89	0.31	hypothetical protein
ETH_00023855	3	0.28	na	na	na	0.33	1.2	0.28	na	na	na	na	na	na	0.04	0.11	0.39	0.24	1.47	0.17	hypothetical protein
ETH_00008005	6	0.28	0.36	1.68	0.22	0.38	2.21	0.17	0.39	1.49	0.26	0.49	2.01	0.24	0.03	0.06	0.43	0.33	0.99	0.33	hypothetical protein
ETH_00022670	6	0.28	0.41	1.95	0.21	0.34	1.93	0.18	0.38	1.55	0.24	0.54	1.56	0.35	0.04	0.08	0.53	0.3	1.97	0.15	hypothetical protein
ETH_00026705	5	0.28	0.42	1.64	0.26	0.36	1.51	0.24	0.43	1.69	0.25	0.4	2.62	0.15	0.04	0.09	0.48	NaN	NaN	NaN	hypothetical protein, conserved
ETH_00012945	6	0.28	0.43	2.08	0.21	0.59	1.82	0.33	0.38	4.79	0.08	0.77	1.89	0.4	0.04	0.14	0.3	0.68	2.01	0.34	STE kinase, putative
ETH_00009495	1	0.28	na	na	na	na	na	na	na	na	na	na	na	na	0.09	0.32	0.28	na	na	na	hypothetical protein
ETH_00003935	6	0.28	0.28	1.35	0.21	0.24	0.97	0.25	0.4	1.92	0.21	0.98	1.8	0.55	0.04	0.17	0.23	0.3	1.41	0.21	hypothetical protein
ETH_00030555	1	0.28	na	na	na	na	na	na	na	na	na	na	na	na	0.03	0.11	0.28	na	na	na	hypothetical protein, conserved
ETH_00026775	2	0.28	na	na	na	0.33	1.55	0.21	na	na	na	na	na	na	0.12	0.36	0.34	na	na	na	hypothetical protein
ETH_00027025	1	0.28	na	na	na	na	na	na	na	na	na	na	na	na	0.02	0.08	0.28	na	na	na	coatomer zeta-2 subunit, putative
ETH_00028945	2	0.28	NaN	NaN	NaN	0.36	1.13	0.31	NaN	NaN	NaN	na	na	na	0.03	0.13	0.24	na	na	na	hypothetical protein, conserved
ETH_00025475	4	0.28	0.48	1.96	0.25	0.52	1.78	0.29	0.49	1.61	0.3	NaN	NaN	NaN	0.06	0.24	0.26	NaN	NaN	NaN	hypothetical protein
ETH_00009835	1	0.28	na	na	na	na	na	na	na	na	na	na	na	na	0.13	0.46	0.28	na	na	na	hypothetical protein
ETH_00005250	6	0.28	0.3	1.2	0.25	0.34	1.27	0.27	0.33	1.16	0.28	0.23	1.31	0.17	0.04	0.11	0.35	0.34	1.04	0.33	hypothetical protein, conserved
ETH_00027315	3	0.28	0.39	1.66	0.23	0.52	1.59	0.33	na	na	na	NaN	NaN	NaN	0.03	0.12	0.27	na	na	na	hypothetical protein
ETH_00001390	2	0.28	NaN	NaN	NaN	NaN	NaN	NaN	NaN	NaN	NaN	0.42	2.32	0.18	0.04	0.1	0.37	NaN	NaN	NaN	hypothetical protein, conserved
ETH_00016590	4	0.28	na	na	na	0.2	0.67	0.3	0.2	0.7	0.28	na	na	na	0.03	0.12	0.26	0.24	0.93	0.26	hypothetical protein
ETH_00011440	4	0.28	0.26	1.83	0.14	0.91	1.34	0.68	na	na	na	0.3	1.5	0.2	0.01	0.15	0.08	NaN	NaN	NaN	hypothetical protein, conserved
ETH_00009815	1	0.28	na	na	na	na	na	na	na	na	na	na	na	na	0.03	0.12	0.28	na	na	na	hypothetical protein
ETH_00037555	5	0.28	0.3	1.71	0.18	0.51	1.39	0.37	NaN	NaN	NaN	0.47	1.29	0.36	0.03	0.14	0.19	0.46	1.64	0.28	dehydrodolichyl diphosphate synthase, putative
ETH_00040975	3	0.27	NaN	NaN	NaN	NaN	NaN	NaN	NaN	NaN	NaN	1.06	2.65	0.4	0.01	0.1	0.06	0.86	2.38	0.36	na
ETH_00003235	4	0.27	0.36	1.39	0.26	0.39	1.4	0.28	0.36	1.59	0.23	na	na	na	0.04	0.11	0.33	na	na	na	hypothetical protein
ETH_00000590	5	0.27	0.52	2.2	0.24	0.52	2.24	0.23	0.52	1.8	0.29	0.5	2.03	0.25	0.04	0.1	0.37	na	na	na	hypothetical protein
ETH_00009630	5	0.27	0.43	1.56	0.27	0.47	1.53	0.31	0.46	1.77	0.26	0.48	1.8	0.27	na	na	na	0.45	1.68	0.27	hypothetical protein
ETH_00023315	4	0.27	0.37	2.08	0.18	0.4	1.61	0.25	na	na	na	0.4	1.48	0.27	0.04	0.09	0.4	na	na	na	hypothetical protein, conserved
ETH_00030275	6	0.27	0.38	1.19	0.32	0.33	1.53	0.22	0.36	1.33	0.27	0.34	1.54	0.22	0.03	0.1	0.35	0.41	1.53	0.27	hypothetical protein
ETH_00022465	4	0.27	na	na	na	0.22	1.82	0.12	na	na	na	0.19	1.22	0.16	0.42	0.63	0.66	0.25	1.53	0.16	long chain acyl-CoA synthetase, putative
ETH_00024060	1	0.27	na	na	na	na	na	na	na	na	na	na	na	na	0.04	0.13	0.27	na	na	na	hypothetical protein, conserved
ETH_00024530	2	0.27	NaN	NaN	NaN	na	na	na	na	na	na	0.25	1.56	0.16	0.04	0.11	0.39	NaN	NaN	NaN	hypothetical protein
ETH_00013725	3	0.27	NaN	NaN	NaN	0.44	1.94	0.23	NaN	NaN	NaN	na	na	na	0.05	0.29	0.17	0.56	1.33	0.42	hypothetical protein
ETH_00006425	6	0.27	0.45	1.76	0.26	0.55	1.91	0.29	0.48	2.05	0.23	0.47	2.58	0.18	0.03	0.07	0.49	0.58	2.93	0.2	hypothetical protein, conserved
ETH_00028585	2	0.27	na	na	na	0.52	1.25	0.41	na	na	na	na	na	na	0.02	0.18	0.13	na	na	na	hypothetical protein
ETH_00023795	4	0.27	0.26	1.6	0.16	na	na	na	na	na	na	0.17	1.12	0.15	0.03	0.06	0.51	0.33	1.19	0.27	hypothetical protein
ETH_00005710	6	0.27	0.4	1.48	0.27	0.44	1.44	0.3	0.4	1.63	0.24	0.4	1.46	0.27	0.03	0.14	0.24	0.4	1.32	0.31	hypothetical protein
ETH_00028395	2	0.27	NaN	NaN	NaN	NaN	NaN	NaN	0.4	2.27	0.18	NaN	NaN	NaN	0.02	0.06	0.37	NaN	NaN	NaN	hypothetical protein, conserved
ETH_00022045	4	0.27	0.33	1.32	0.25	0.54	1.49	0.36	0.32	1.36	0.24	na	na	na	na	na	na	0.33	1.39	0.24	proline oxidase, putative
ETH_00041960	4	0.27	0.29	1.04	0.28	0.31	1.45	0.21	NaN	NaN	NaN	0.48	1.3	0.37	0.03	0.13	0.23	na	na	na	hypothetical protein
ETH_00032570	6	0.27	0.18	0.97	0.19	0.23	1.1	0.21	0.24	1.62	0.15	0.27	1.29	0.21	0.13	0.24	0.55	0.44	1.34	0.33	hypothetical protein, conserved
ETH_00023285	5	0.27	na	na	na	0.45	2.49	0.18	0.49	1.62	0.3	0.45	1.74	0.26	0.04	0.11	0.4	0.51	2.36	0.22	hypothetical protein
ETH_00033700	5	0.27	0.44	2.28	0.19	0.57	1.41	0.41	NaN	NaN	NaN	0.46	1.92	0.24	0.14	0.38	0.37	0.5	3.16	0.16	hypothetical protein
ETH_00007640	6	0.27	0.68	1.57	0.43	0.65	2.06	0.32	0.33	1.81	0.18	0.61	1.43	0.42	0.01	0.1	0.13	0.31	2.02	0.15	hypothetical protein, conserved
ETH_00027040	5	0.27	0.28	0.98	0.28	0.32	0.88	0.36	0.35	2.88	0.12	0.24	0.91	0.26	0.04	0.11	0.33	na	na	na	TBC domain-containing protein, putative
ETH_00013430	6	0.27	0.33	1.51	0.22	0.36	1.77	0.2	0.5	3.8	0.13	0.44	1.84	0.24	0.08	0.17	0.48	0.48	1.31	0.37	hypothetical protein, conserved
ETH_00008255	3	0.27	0.43	2.26	0.19	na	na	na	NaN	NaN	NaN	na	na	na	0.04	0.16	0.28	0.57	1.65	0.34	hypothetical protein, conserved
ETH_00012735	3	0.27	0.42	2.06	0.2	0.49	1.77	0.28	na	na	na	0.49	1.47	0.33	na	na	na	NaN	NaN	NaN	hypothetical protein
ETH_00006155	2	0.27	NaN	NaN	NaN	na	na	na	1.24	3.63	0.34	na	na	na	0.06	0.3	0.2	na	na	na	CDK-activating kinase assembly factor, putative
ETH_00004315	6	0.27	0.23	1.12	0.2	0.26	1.19	0.22	0.22	1.19	0.19	0.76	2	0.38	0.01	0.12	0.1	0.81	1.48	0.55	hypothetical protein
ETH_00037970	2	0.27	na	na	na	0.1	1.38	0.07	NaN	NaN	NaN	NaN	NaN	NaN	0.09	0.18	0.47	na	na	na	WD domain, G-beta repeat-containing protein, putative
ETH_00007790	1	0.27	na	na	na	na	na	na	na	na	na	na	na	na	0.13	0.47	0.27	na	na	na	hypothetical protein, conserved
ETH_00013910	4	0.27	na	na	na	0.35	1.76	0.2	0.41	1.93	0.21	0.46	1.21	0.38	0.06	0.2	0.29	NaN	NaN	NaN	hypothetical protein, conserved
ETH_00027115	4	0.27	0.29	1.57	0.19	0.26	2.03	0.13	na	na	na	0.4	0.69	0.58	0.02	0.1	0.2	na	na	na	hypothetical protein, conserved
ETH_00035685	1	0.27	na	na	na	na	na	na	na	na	na	na	na	na	0.04	0.13	0.27	na	na	na	hypothetical protein
ETH_00018930	6	0.27	0.3	2.02	0.15	0.38	1.63	0.23	0.49	1.75	0.28	0.43	1.54	0.28	0.04	0.08	0.5	0.34	1.76	0.19	hypothetical protein
ETH_00014365	3	0.27	0.37	1.53	0.24	na	na	na	NaN	NaN	NaN	NaN	NaN	NaN	0.05	0.11	0.42	0.37	2.42	0.15	tRNA synthetase, putative
ETH_00008450	5	0.27	na	na	na	0.3	1.03	0.29	0.37	2.29	0.16	0.35	1.84	0.19	0.05	0.19	0.26	0.66	1.46	0.45	hypothetical protein, conserved
ETH_00017190	1	0.27	na	na	na	na	na	na	na	na	na	na	na	na	0.02	0.07	0.27	na	na	na	hypothetical protein
ETH_00012870	4	0.27	0.32	0.99	0.32	0.36	1.68	0.21	NaN	NaN	NaN	0.32	1.83	0.18	0.04	0.11	0.37	NaN	NaN	NaN	hypothetical protein
ETH_00024570	6	0.27	0.43	1.51	0.28	0.38	1.73	0.22	0.45	1.9	0.24	0.45	1.42	0.31	0.03	0.1	0.34	0.44	1.91	0.23	hypothetical protein
ETH_00027505	2	0.27	na	na	na	0.49	2.2	0.22	na	na	na	na	na	na	0.06	0.18	0.32	na	na	na	hypothetical protein
ETH_00039960	4	0.27	0.34	1.7	0.2	0.31	1.35	0.23	na	na	na	NaN	NaN	NaN	0.03	0.21	0.14	0.86	1.69	0.51	hypothetical protein
ETH_00025480	1	0.27	NaN	NaN	NaN	na	na	na	na	na	na	na	na	na	0.04	0.16	0.27	na	na	na	mRNA capping enzyme, putative
ETH_00022145	6	0.27	0.33	1.72	0.19	0.31	1.02	0.3	0.39	1.55	0.25	0.4	1.07	0.38	0.04	0.16	0.25	0.34	1.36	0.25	hypothetical protein
ETH_00011785	3	0.27	0.29	1.09	0.27	NaN	NaN	NaN	0.33	3.88	0.09	na	na	na	0.06	0.12	0.46	NaN	NaN	NaN	hypothetical protein
ETH_00032025	5	0.27	0.55	2.21	0.25	0.61	2.16	0.28	0.61	2.5	0.24	na	na	na	0.05	0.13	0.37	0.71	3.53	0.2	Proteophosphoglycan ppg4, related
ETH_00003080	2	0.27	NaN	NaN	NaN	0.3	1.78	0.17	NaN	NaN	NaN	na	na	na	0.13	0.35	0.37	na	na	na	adenylosuccinate lyase, putative
ETH_00006060	2	0.27	NaN	NaN	NaN	NaN	NaN	NaN	0.13	2.28	0.05	na	na	na	0.05	0.11	0.49	NaN	NaN	NaN	hypothetical protein, conserved
ETH_00037405	3	0.27	0.3	3.33	0.09	0.31	1.54	0.2	NaN	NaN	NaN	na	na	na	0.44	0.84	0.52	na	na	na	proteasome PCI domain-containing protein, putative
ETH_00007460	5	0.27	0.48	1.62	0.3	0.43	1.89	0.23	0.47	1.97	0.24	na	na	na	0.03	0.09	0.35	0.45	1.96	0.23	hypothetical protein
ETH_00038835	3	0.27	0.45	3.06	0.15	0.69	4.08	0.17	NaN	NaN	NaN	0.88	1.78	0.49	na	na	na	na	na	na	hypothetical protein
ETH_00042375	4	0.27	0.12	1.52	0.08	0.09	2.01	0.05	NaN	NaN	NaN	0.92	1.77	0.52	0.08	0.18	0.43	NaN	NaN	NaN	na
ETH_00031245	5	0.27	0.36	1.44	0.25	0.41	2.3	0.18	0.37	1.3	0.29	na	na	na	0.04	0.1	0.38	0.35	1.34	0.26	hypothetical protein
ETH_00042795	4	0.27	0.52	2.4	0.22	0.37	1.82	0.21	na	na	na	0.11	1.59	0.07	0.12	0.21	0.59	na	na	na	hypothetical protein
ETH_00014430	4	0.27	NaN	NaN	NaN	0.37	1.33	0.28	NaN	NaN	NaN	0.41	1.7	0.24	0.06	0.17	0.35	0.55	2.62	0.21	hypothetical protein, conserved
ETH_00024315	5	0.27	0.37	1.67	0.22	0.3	1.26	0.24	NaN	NaN	NaN	0.45	1.45	0.31	0.04	0.13	0.34	0.48	2.05	0.24	hypothetical protein
ETH_00028425	6	0.27	0.39	1.52	0.26	0.34	1.51	0.22	0.4	2	0.2	0.39	1.44	0.27	0.04	0.12	0.33	0.52	1.55	0.33	hypothetical protein
ETH_00005345	3	0.27	na	na	na	0.46	1.91	0.24	na	na	na	0.28	2.14	0.13	0.06	0.15	0.43	na	na	na	hypothetical protein, conserved
ETH_00012395	3	0.27	0.52	2.4	0.22	0.57	2.64	0.22	NaN	NaN	NaN	NaN	NaN	NaN	0.06	0.16	0.37	na	na	na	hypothetical protein
ETH_00041140	6	0.27	0.2	0.95	0.22	0.12	0.8	0.16	0.11	1.19	0.09	0.45	1.24	0.36	0.01	0.01	0.36	0.44	1.03	0.43	hypothetical protein
ETH_00030820	6	0.27	0.48	1.67	0.29	0.48	1.85	0.26	0.48	2.25	0.21	0.47	1.72	0.27	0.04	0.12	0.37	0.43	2.01	0.21	hypothetical protein
ETH_00008870	5	0.27	0.37	1.1	0.34	0.24	1.3	0.18	na	na	na	0.38	0.96	0.4	0.01	0.07	0.15	0.33	1.21	0.27	hypothetical protein, conserved
ETH_00001275	5	0.27	0.12	0.86	0.14	0.16	0.96	0.17	0.18	1.16	0.15	0.3	0.9	0.33	0.21	0.38	0.55	na	na	na	NADPH-cytochrome p450 reductase, putative
ETH_00024895	4	0.27	0.5	2.21	0.23	0.53	1.78	0.3	NaN	NaN	NaN	0.52	1.46	0.36	na	na	na	0.53	2.8	0.19	hypothetical protein, conserved
ETH_00015665	5	0.27	0.44	1.48	0.3	0.42	1.96	0.21	0.37	1.87	0.2	0.48	1.69	0.28	0.03	0.09	0.35	NaN	NaN	NaN	hypothetical protein
ETH_00030830	6	0.27	0.43	1.31	0.33	0.36	2.04	0.18	0.5	2.05	0.24	0.39	1.58	0.25	0.05	0.14	0.38	0.4	1.76	0.23	hypothetical protein
ETH_00009065	6	0.27	0.39	1.5	0.26	0.29	1.19	0.24	0.4	2.07	0.2	0.39	1.32	0.29	0.06	0.19	0.31	0.42	1.37	0.3	hypothetical protein
ETH_00019260	2	0.27	0.53	1.54	0.35	na	na	na	na	na	na	na	na	na	0.11	0.57	0.19	na	na	na	zinc finger DHHC domain-containing protein, putative
ETH_00014870	1	0.27	na	na	na	na	na	na	na	na	na	na	na	na	0.05	0.17	0.27	na	na	na	hypothetical protein
ETH_00005880	5	0.27	0.25	1.62	0.16	0.22	1.02	0.22	NaN	NaN	NaN	0.42	1.08	0.39	0.09	0.17	0.53	0.32	6.67	0.05	TPR domain-containing protein, putative
ETH_00035535	3	0.27	0.45	1.84	0.25	0.45	1.69	0.26	NaN	NaN	NaN	NaN	NaN	NaN	0.08	0.28	0.29	NaN	NaN	NaN	hypothetical protein, conserved
ETH_00007090	6	0.27	0.29	2.97	0.1	0.29	1.86	0.16	0.31	1.31	0.24	0.46	1.88	0.25	0.05	0.07	0.74	0.35	2.7	0.13	hypothetical protein
ETH_00000755	6	0.27	0.51	1.88	0.27	0.5	1.96	0.26	0.51	1.96	0.26	0.45	1.76	0.25	0.04	0.11	0.35	0.51	2.36	0.22	hypothetical protein, conserved
ETH_00007930	1	0.27	na	na	na	na	na	na	na	na	na	na	na	na	0.03	0.1	0.27	na	na	na	hypothetical protein
ETH_00012670	1	0.27	na	na	na	na	na	na	na	na	na	na	na	na	0.06	0.23	0.27	na	na	na	hypothetical protein
ETH_00014480	3	0.27	NaN	NaN	NaN	0.5	1.56	0.32	0.44	2.5	0.18	NaN	NaN	NaN	0.04	0.11	0.31	na	na	na	hypothetical protein, conserved
ETH_00041710	4	0.27	0.43	3.2	0.13	0.37	1.3	0.28	0.6	2.96	0.2	0.8	1.79	0.45	na	na	na	NaN	NaN	NaN	hypothetical protein
ETH_00021240	3	0.27	na	na	na	0.58	4.56	0.13	NaN	NaN	NaN	0.75	1.93	0.39	0.08	0.27	0.29	na	na	na	ftsJ-like methyltransferase domain-containing protein, putative
ETH_00022395	1	0.27	na	na	na	na	na	na	na	na	na	na	na	na	0.03	0.13	0.27	NaN	NaN	NaN	hypothetical protein, conserved
ETH_00034030	2	0.27	na	na	na	0.54	1.43	0.38	na	na	na	na	na	na	na	na	na	0.38	2.44	0.15	hypothetical protein
ETH_00013320	2	0.27	NaN	NaN	NaN	0.61	2.49	0.25	NaN	NaN	NaN	na	na	na	0.06	0.23	0.29	na	na	na	hypothetical protein
ETH_00033230	3	0.27	0.19	1.17	0.16	0.32	1.83	0.18	NaN	NaN	NaN	na	na	na	0.11	0.24	0.47	na	na	na	hypothetical protein, conserved
ETH_00012690	6	0.27	0.27	1.59	0.17	0.35	1.14	0.31	0.27	2.52	0.11	0.27	1.37	0.2	0.1	0.15	0.64	0.36	2.05	0.18	hypothetical protein, conserved
ETH_00028670	2	0.27	0.25	2.35	0.11	na	na	na	NaN	NaN	NaN	na	na	na	0.11	0.26	0.43	na	na	na	hypothetical protein
ETH_00013925	4	0.27	NaN	NaN	NaN	0.54	2.2	0.25	NaN	NaN	NaN	0.46	2.03	0.23	0.09	0.33	0.27	0.9	2.74	0.33	dpy-30 motif-containing protein, putative
ETH_00038135	5	0.27	0.19	0.74	0.26	NaN	NaN	NaN	0.27	1.37	0.2	0.28	1.29	0.22	0.13	0.26	0.5	0.26	1.67	0.16	hypothetical protein
ETH_00004155	1	0.27	na	na	na	na	na	na	na	na	na	na	na	na	0.02	0.08	0.27	na	na	na	hypothetical protein
ETH_00015155	2	0.27	na	na	na	0.18	1.01	0.17	0.84	2.33	0.36	na	na	na	na	na	na	na	na	na	hypothetical protein
ETH_00030940	4	0.27	na	na	na	0.51	2.78	0.18	0.59	2.99	0.2	0.49	1.46	0.34	0.05	0.14	0.35	NaN	NaN	NaN	hypothetical protein
ETH_00034465	4	0.27	na	na	na	0.24	1.7	0.14	0.24	1.15	0.21	0.27	1.1	0.24	0.05	0.1	0.48	na	na	na	elongation factor G, putative
ETH_00027710	5	0.27	0.12	0.93	0.13	0.38	1.19	0.32	0.19	2.49	0.08	na	na	na	0.39	0.57	0.69	0.15	1.42	0.11	hypothetical protein, conserved
ETH_00019680	4	0.27	0.62	3.23	0.19	0.57	2	0.29	NaN	NaN	NaN	na	na	na	0.03	0.1	0.31	0.61	2.16	0.28	hypothetical protein
ETH_00030495	1	0.27	na	na	na	NaN	NaN	NaN	na	na	na	na	na	na	0.09	0.33	0.27	na	na	na	hypothetical protein, conserved
ETH_00015790	4	0.27	0.64	1.75	0.37	na	na	na	0.57	2.7	0.21	0.51	1.73	0.29	0.03	0.15	0.2	na	na	na	hypothetical protein, conserved
ETH_00012895	5	0.27	0.35	1.43	0.25	0.41	1.16	0.36	NaN	NaN	NaN	0.49	2.43	0.2	0.04	0.14	0.27	0.35	1.33	0.26	hypothetical protein, conserved
ETH_00027195	3	0.27	NaN	NaN	NaN	0.29	1.68	0.17	NaN	NaN	NaN	NaN	NaN	NaN	0.07	0.25	0.28	0.82	2.36	0.35	hypothetical protein, conserved
ETH_00014535	4	0.27	0.34	1.59	0.22	0.43	1.22	0.35	NaN	NaN	NaN	0.47	2.01	0.23	na	na	na	0.35	1.29	0.27	hypothetical protein
ETH_00008835	1	0.27	na	na	na	na	na	na	na	na	na	na	na	na	0.04	0.16	0.27	na	na	na	hypothetical protein
ETH_00021010	4	0.27	na	na	na	0.43	2.53	0.17	NaN	NaN	NaN	0.48	2.49	0.19	0.09	0.18	0.53	0.45	2.58	0.17	microneme protein, putative
ETH_00029035	3	0.27	NaN	NaN	NaN	NaN	NaN	NaN	0.21	2.06	0.1	0.34	2.12	0.16	na	na	na	0.87	1.62	0.53	hypothetical protein, conserved
ETH_00012235	6	0.27	0.53	1.45	0.36	0.51	1.99	0.26	0.56	2.38	0.24	0.53	1.98	0.27	0.04	0.12	0.34	0.37	3.02	0.12	hypothetical protein
ETH_00026435	2	0.27	0.44	1.7	0.26	na	na	na	na	na	na	na	na	na	0.03	0.11	0.27	na	na	na	hypothetical protein, conserved
ETH_00036250	1	0.27	na	na	na	na	na	na	na	na	na	0.35	1.32	0.27	na	na	na	na	na	na	na
ETH_00009680	5	0.27	0.41	1.08	0.38	0.4	1.33	0.3	na	na	na	0.33	1.48	0.22	0.03	0.22	0.16	0.45	1.71	0.26	hypothetical protein
ETH_00002280	1	0.27	na	na	na	NaN	NaN	NaN	na	na	na	NaN	NaN	NaN	0.02	0.09	0.27	na	na	na	hypothetical protein
ETH_00042405	2	0.27	0.42	2	0.21	0.54	1.67	0.32	na	na	na	na	na	na	na	na	na	na	na	na	hypothetical protein, conserved
ETH_00019770	3	0.27	0.53	1.65	0.32	na	na	na	0.43	3.23	0.13	na	na	na	0.09	0.26	0.34	na	na	na	hypothetical protein, conserved
ETH_00010035	3	0.26	na	na	na	na	na	na	0.18	0.72	0.25	0.12	0.63	0.19	na	na	na	0.26	0.72	0.36	hypothetical protein
ETH_00008360	6	0.26	0.57	1.91	0.3	0.69	3.95	0.18	0.47	2.22	0.21	0.59	2.41	0.24	0.04	0.1	0.41	0.47	1.88	0.25	hypothetical protein
ETH_00006835	1	0.26	na	na	na	na	na	na	na	na	na	na	na	na	0.02	0.08	0.26	na	na	na	hypothetical protein
ETH_00013575	1	0.26	na	na	na	na	na	na	na	na	na	na	na	na	0.04	0.15	0.26	na	na	na	hypothetical protein
ETH_00001800	6	0.26	0.33	1.35	0.24	0.33	1.59	0.21	0.37	1.25	0.29	0.33	1.4	0.24	0.03	0.08	0.35	0.31	1.23	0.25	hypothetical protein, conserved
ETH_00023105	6	0.26	0.4	1.59	0.25	0.4	1.38	0.29	0.45	1.77	0.26	0.38	1.84	0.21	0.05	0.12	0.39	0.37	1.95	0.19	hypothetical protein
ETH_00014265	6	0.26	0.36	1.15	0.31	0.4	1.58	0.25	0.27	1.73	0.16	0.31	1.24	0.25	0.03	0.07	0.36	0.31	1.24	0.25	hypothetical protein
ETH_00001405	4	0.26	0.41	2.61	0.16	na	na	na	0.45	2.49	0.18	0.6	1.83	0.33	0.05	0.13	0.39	na	na	na	hypothetical protein, conserved
ETH_00017575	6	0.26	0.43	2.63	0.16	0.46	1.84	0.25	0.53	1.82	0.29	0.49	1.54	0.32	0.09	0.35	0.27	0.6	1.98	0.3	hypothetical protein, conserved
ETH_00015890	2	0.26	na	na	na	na	na	na	0.37	3.38	0.11	na	na	na	0.1	0.25	0.42	na	na	na	hypothetical protein, conserved
ETH_00030880	5	0.26	0.38	3.89	0.1	0.35	1.53	0.23	NaN	NaN	NaN	0.43	1.34	0.32	0.06	0.15	0.43	0.54	2.3	0.23	hypothetical protein
ETH_00031380	3	0.26	0.41	1.58	0.26	na	na	na	na	na	na	0.41	1.82	0.22	0.03	0.09	0.31	na	na	na	hypothetical protein
ETH_00000525	5	0.26	0.38	3.93	0.1	NaN	NaN	NaN	0.46	1.83	0.25	0.38	1.97	0.19	0.05	0.14	0.37	0.78	1.88	0.41	hypothetical protein
ETH_00031555	1	0.26	na	na	na	NaN	NaN	NaN	na	na	na	NaN	NaN	NaN	0.02	0.07	0.26	NaN	NaN	NaN	hypothetical protein
ETH_00029200	5	0.26	0.33	1.47	0.23	na	na	na	0.33	2	0.17	0.32	1.6	0.2	0.06	0.1	0.55	0.28	1.61	0.17	hypothetical protein, conserved
ETH_00009845	4	0.26	0.49	1.89	0.26	0.5	3.85	0.13	0.6	2.54	0.24	na	na	na	0.05	0.11	0.43	NaN	NaN	NaN	hypothetical protein
ETH_00013025	3	0.26	0.57	1.68	0.34	0.43	1.26	0.34	na	na	na	na	na	na	0.01	0.09	0.11	na	na	na	hypothetical protein, conserved
ETH_00002080	3	0.26	0.55	1.69	0.33	0.46	1.96	0.24	na	na	na	na	na	na	0.02	0.09	0.23	na	na	na	hypothetical protein
ETH_00016335	3	0.26	0.25	3.16	0.08	NaN	NaN	NaN	0.31	1.59	0.2	NaN	NaN	NaN	0.14	0.28	0.52	na	na	na	hypothetical protein
ETH_00028420	4	0.26	na	na	na	0.44	1.89	0.23	na	na	na	0.56	2.94	0.19	0.05	0.13	0.4	0.47	2.04	0.23	hypothetical protein
ETH_00034850	5	0.26	0.21	1.29	0.16	0.17	1.14	0.15	na	na	na	0.24	1.57	0.15	0.46	0.67	0.68	0.29	1.63	0.17	hypothetical protein
ETH_00032520	2	0.26	na	na	na	0.41	1.33	0.31	na	na	na	na	na	na	0.02	0.1	0.21	na	na	na	hypothetical protein, conserved
ETH_00034445	5	0.26	0.4	1.63	0.24	0.39	1.59	0.25	0.44	1.76	0.25	0.4	1.66	0.24	0.03	0.1	0.33	na	na	na	hypothetical protein
ETH_00021445	6	0.26	0.36	1.71	0.21	0.38	1.91	0.2	0.48	1.94	0.25	0.36	1.34	0.27	0.04	0.11	0.43	0.35	1.58	0.22	hypothetical protein, conserved
ETH_00032075	1	0.26	na	na	na	na	na	na	na	na	na	na	na	na	0.05	0.18	0.26	na	na	na	U3 small nucleolar ribonucleoprotein protein, putative
ETH_00037935	1	0.26	na	na	na	na	na	na	na	na	na	na	na	na	0.02	0.08	0.26	na	na	na	hypothetical protein
ETH_00021015	6	0.26	0.35	1.29	0.27	0.38	1.58	0.24	0.43	1.54	0.28	0.36	2	0.18	0.05	0.14	0.39	0.34	1.56	0.22	geranylgeranyl transferase type II beta subunit, putative
ETH_00033950	2	0.26	NaN	NaN	NaN	0.53	2.6	0.2	na	na	na	na	na	na	0.04	0.14	0.32	na	na	na	hypothetical protein
ETH_00001395	5	0.26	na	na	na	0.75	2.99	0.25	0.8	5.15	0.15	0.72	2.14	0.34	0.05	0.16	0.3	0.71	2.65	0.27	hypothetical protein
ETH_00030875	5	0.26	0.3	1.18	0.25	0.28	1.09	0.26	0.31	1.24	0.25	na	na	na	0.03	0.11	0.26	0.32	1.11	0.29	hypothetical protein, conserved
ETH_00013865	2	0.26	na	na	na	na	na	na	na	na	na	na	na	na	0.05	0.18	0.26	0.54	2.04	0.26	hypothetical protein
ETH_00029045	4	0.26	na	na	na	0.3	1.35	0.22	0.28	1.78	0.15	0.41	1.06	0.39	0.04	0.13	0.29	na	na	na	hypothetical protein
ETH_00013165	1	0.26	na	na	na	na	na	na	na	na	na	na	na	na	0.11	0.43	0.26	na	na	na	sag
ETH_00013350	1	0.26	na	na	na	na	na	na	na	na	na	na	na	na	0.02	0.08	0.26	na	na	na	hypothetical protein
ETH_00027875	1	0.26	na	na	na	na	na	na	na	na	na	na	na	na	0.04	0.15	0.26	na	na	na	hypothetical protein, conserved
ETH_00013030	6	0.26	0.38	1.54	0.25	0.37	2.18	0.17	0.33	1.48	0.22	0.44	1.47	0.3	0.02	0.09	0.25	0.53	1.38	0.39	hypothetical protein, conserved
ETH_00016850	4	0.26	0.42	1.82	0.23	0.38	1.59	0.24	0.54	2.08	0.26	na	na	na	na	na	na	0.61	1.86	0.33	hypothetical protein
ETH_00019010	3	0.26	na	na	na	na	na	na	na	na	na	0.31	1.61	0.19	0.04	0.1	0.39	0.36	1.76	0.2	hypothetical protein, conserved
ETH_00001610	4	0.26	0.39	3.18	0.12	NaN	NaN	NaN	na	na	na	0.7	2.69	0.26	0.05	0.16	0.29	0.48	1.25	0.38	hypothetical protein, conserved
ETH_00039045	5	0.26	0.29	1.07	0.27	0.99	1.96	0.51	0.27	1.66	0.16	0.36	2.09	0.17	na	na	na	0.33	1.63	0.2	na
ETH_00017185	1	0.26	na	na	na	na	na	na	na	na	na	na	na	na	0.06	0.24	0.26	na	na	na	hypothetical protein
ETH_00005335	1	0.26	na	na	na	na	na	na	na	na	na	na	na	na	0.08	0.31	0.26	na	na	na	hypothetical protein
ETH_00023420	4	0.26	na	na	na	0.32	1.52	0.21	NaN	NaN	NaN	0.55	1.17	0.47	0.02	0.11	0.18	0.54	2.95	0.18	hypothetical protein
ETH_00026385	4	0.26	0.39	2.06	0.19	0.39	1.44	0.27	0.37	1.28	0.29	na	na	na	0.11	0.36	0.3	na	na	na	hypothetical protein
ETH_00019495	2	0.26	NaN	NaN	NaN	NaN	NaN	NaN	NaN	NaN	NaN	na	na	na	0.05	0.15	0.3	0.54	2.46	0.22	hypothetical protein
ETH_00035090	1	0.26	na	na	na	na	na	na	na	na	na	NaN	NaN	NaN	0.03	0.13	0.26	na	na	na	hypothetical protein
ETH_00025905	6	0.26	0.44	1.75	0.25	0.41	1.6	0.25	0.44	1.34	0.33	0.36	1.61	0.22	0.03	0.14	0.25	0.34	1.31	0.26	hypothetical protein
ETH_00010650	5	0.26	0.29	1.45	0.2	0.36	1.43	0.25	0.41	1.6	0.26	0.36	1.96	0.19	0.1	0.24	0.42	NaN	NaN	NaN	hypothetical protein
ETH_00009825	1	0.26	na	na	na	NaN	NaN	NaN	NaN	NaN	NaN	na	na	na	0.05	0.2	0.26	na	na	na	hypothetical protein, conserved
ETH_00003525	2	0.26	0.44	3.52	0.12	na	na	na	NaN	NaN	NaN	na	na	na	0.05	0.12	0.4	na	na	na	hypothetical protein
ETH_00019410	6	0.26	0.36	1.41	0.26	0.36	1.66	0.22	0.44	1.79	0.24	0.29	1.45	0.2	0.09	0.21	0.43	0.34	1.56	0.22	hypothetical protein
ETH_00003025	3	0.26	0.42	2.22	0.19	0.37	1.47	0.25	NaN	NaN	NaN	na	na	na	0.04	0.11	0.34	na	na	na	hypothetical protein, conserved
ETH_00021500	4	0.26	0.29	1.06	0.27	0.26	0.95	0.27	0.29	1.39	0.21	na	na	na	0.04	0.13	0.3	na	na	na	hypothetical protein
ETH_00028765	3	0.26	na	na	na	0.57	2.56	0.22	na	na	na	0.52	2.88	0.18	0.04	0.1	0.38	na	na	na	hypothetical protein
ETH_00014705	2	0.26	NaN	NaN	NaN	na	na	na	na	na	na	0.58	2.06	0.28	0.06	0.23	0.24	na	na	na	plasmodium falciparum CPW-WPC domain-containing protein, putative
ETH_00034620	6	0.26	0.33	1.85	0.18	0.37	1.79	0.21	0.36	1.23	0.29	0.3	1.58	0.19	0.05	0.11	0.45	0.33	1.37	0.24	hypothetical protein
ETH_00002830	6	0.26	0.38	1.53	0.25	0.38	1.99	0.19	0.36	2.39	0.15	0.4	1.59	0.25	0.11	0.2	0.53	0.34	1.79	0.19	CMGC kinase, Dyrk family, putative
ETH_00015580	6	0.26	0.34	1.75	0.2	0.48	1.96	0.25	0.47	1.53	0.31	0.7	2.87	0.24	0.04	0.12	0.3	0.55	2.06	0.27	hypothetical protein
ETH_00025600	1	0.26	na	na	na	na	na	na	na	na	na	na	na	na	0.12	0.48	0.26	na	na	na	esf1 family
ETH_00007900	5	0.26	0.29	2.15	0.13	NaN	NaN	NaN	0.36	1.69	0.21	0.42	1.73	0.24	0.05	0.1	0.47	0.39	1.64	0.24	hypothetical protein
ETH_00017355	5	0.26	0.47	1.63	0.29	0.45	1.75	0.26	0.48	2.64	0.18	0.45	1.77	0.25	na	na	na	0.53	1.67	0.32	hypothetical protein, conserved
ETH_00016160	3	0.26	0.48	1.9	0.25	na	na	na	0.52	1.8	0.29	na	na	na	0.03	0.14	0.24	NaN	NaN	NaN	hypothetical protein
ETH_00027275	4	0.26	0.31	1.53	0.2	0.64	1.73	0.37	na	na	na	0.26	2.65	0.1	0.12	0.32	0.37	na	na	na	hypothetical protein
ETH_00025710	6	0.26	0.29	1.28	0.22	0.26	1.25	0.21	0.24	1.25	0.19	0.27	1.05	0.26	0.08	0.17	0.47	0.26	1.3	0.2	hypothetical protein, conserved
ETH_00018285	4	0.26	na	na	na	0.28	1.66	0.17	0.47	2.69	0.18	0.28	1.57	0.18	0.03	0.07	0.52	na	na	na	hypothetical protein
ETH_00026955	2	0.26	na	na	na	0.5	1.94	0.26	0.48	1.86	0.26	na	na	na	na	na	na	na	na	na	hypothetical protein, conserved
ETH_00019340	5	0.26	0.35	1.44	0.24	0.32	1.47	0.22	0.43	1.71	0.25	0.31	1.55	0.2	0.03	0.09	0.38	NaN	NaN	NaN	hypothetical protein
ETH_00010585	4	0.26	0.43	1.63	0.26	na	na	na	0.39	1.64	0.24	0.57	1.95	0.29	0.03	0.13	0.24	na	na	na	hypothetical protein
ETH_00013205	3	0.26	na	na	na	0.34	1.03	0.33	0.32	1.57	0.2	0.39	1.57	0.25	na	na	na	na	na	na	arginyl-tRNA synthetase, putative
ETH_00011790	6	0.26	0.36	1.47	0.25	0.36	1.56	0.23	0.37	1.78	0.21	0.35	1.61	0.21	0.03	0.07	0.39	0.36	1.35	0.27	hypothetical protein
ETH_00023775	1	0.26	na	na	na	na	na	na	na	na	na	na	na	na	0.09	0.36	0.26	na	na	na	hypothetical protein
ETH_00012245	5	0.26	0.34	1.47	0.23	0.37	1.51	0.25	0.41	1.47	0.28	na	na	na	0.03	0.1	0.31	0.34	1.43	0.23	hypothetical protein, conserved
ETH_00029015	6	0.26	0.29	1.29	0.22	0.26	1.59	0.16	0.33	2.2	0.15	0.33	1.54	0.21	0.05	0.08	0.65	0.28	1.88	0.15	armadillo/beta-catenin-like repeat-containing protein, putative
ETH_00000435	5	0.26	0.54	2.13	0.25	0.47	3	0.16	0.48	1.53	0.32	na	na	na	0.02	0.08	0.27	0.47	1.57	0.3	hypothetical protein
ETH_00026715	1	0.26	na	na	na	na	na	na	na	na	na	na	na	na	0.03	0.1	0.26	na	na	na	CAM kinase (incomplete catalytic triad), putative
ETH_00003975	1	0.26	NaN	NaN	NaN	NaN	NaN	NaN	na	na	na	na	na	na	0.04	0.15	0.26	na	na	na	hypothetical protein, conserved
ETH_00028410	5	0.26	0.48	1.82	0.27	0.45	2.9	0.15	0.53	2.28	0.23	0.5	2.04	0.25	0.04	0.11	0.4	na	na	na	hypothetical protein
ETH_00041450	1	0.26	na	na	na	na	na	na	na	na	na	na	na	na	0.06	0.23	0.26	na	na	na	na
ETH_00013875	2	0.26	NaN	NaN	NaN	0.43	2.67	0.16	na	na	na	na	na	na	0.26	0.74	0.36	na	na	na	hypothetical protein, conserved
ETH_00032925	3	0.26	na	na	na	na	na	na	NaN	NaN	NaN	0.28	1.34	0.21	0.14	0.34	0.41	0.24	1.54	0.16	hypothetical protein
ETH_00030670	5	0.26	0.45	2.85	0.16	na	na	na	0.59	5.9	0.1	0.55	1.75	0.32	0.03	0.08	0.37	0.65	1.9	0.34	hypothetical protein
ETH_00030770	1	0.26	na	na	na	na	na	na	na	na	na	na	na	na	0.04	0.17	0.26	na	na	na	hypothetical protein
ETH_00018480	3	0.26	0.39	2.77	0.14	0.45	1.15	0.39	NaN	NaN	NaN	na	na	na	0.05	0.21	0.24	NaN	NaN	NaN	hypothetical protein
ETH_00012370	1	0.26	na	na	na	na	na	na	na	na	na	na	na	na	0.06	0.21	0.26	na	na	na	hypothetical protein
ETH_00026885	5	0.26	0.58	4.45	0.13	0.65	2.98	0.22	0.56	2.11	0.27	NaN	NaN	NaN	0.05	0.1	0.52	0.61	3.88	0.16	hypothetical protein
ETH_00013150	1	0.26	na	na	na	na	na	na	na	na	na	na	na	na	0.04	0.16	0.26	na	na	na	sag
ETH_00021360	3	0.26	na	na	na	na	na	na	na	na	na	0.67	3.95	0.17	0.04	0.14	0.26	0.42	1.24	0.34	hypothetical protein
ETH_00014500	2	0.26	0.35	1.57	0.22	na	na	na	na	na	na	na	na	na	0.04	0.13	0.29	na	na	na	hypothetical protein
ETH_00021135	5	0.26	0.36	1.39	0.26	0.42	2.01	0.21	0.46	1.68	0.28	na	na	na	0.04	0.14	0.28	0.45	1.73	0.26	hypothetical protein, conserved
ETH_00001120	2	0.26	0.2	1.81	0.11	na	na	na	na	na	na	na	na	na	0.2	0.51	0.4	na	na	na	hypothetical protein, conserved
ETH_00008390	1	0.26	na	na	na	na	na	na	na	na	na	na	na	na	0.04	0.16	0.26	na	na	na	hypothetical protein
ETH_00002190	1	0.26	NaN	NaN	NaN	NaN	NaN	NaN	NaN	NaN	NaN	na	na	na	0.04	0.15	0.26	na	na	na	hypothetical protein, conserved
ETH_00016675	4	0.26	na	na	na	0.31	1.23	0.25	0.34	1.22	0.28	na	na	na	0.04	0.15	0.25	0.3	1.22	0.25	hypothetical protein
ETH_00006705	6	0.26	0.38	1.7	0.22	0.24	1.51	0.16	0.33	2.68	0.12	0.45	1.43	0.31	0.08	0.16	0.5	0.34	1.47	0.23	ribosome biogenesis protein BOP1, putative
ETH_00011135	5	0.26	1.03	2.78	0.37	0.31	1.96	0.16	0.38	2.01	0.19	na	na	na	0.03	0.09	0.31	0.38	1.48	0.26	hypothetical protein
ETH_00013305	1	0.26	na	na	na	na	na	na	na	na	na	na	na	na	0.08	0.31	0.26	na	na	na	hypothetical protein
ETH_00019330	1	0.26	na	na	na	na	na	na	na	na	na	na	na	na	0.03	0.13	0.26	na	na	na	hypothetical protein
ETH_00025220	1	0.26	na	na	na	NaN	NaN	NaN	na	na	na	na	na	na	0.03	0.12	0.26	na	na	na	hypothetical protein
ETH_00019670	6	0.26	0.35	1.76	0.2	0.44	1.32	0.33	0.35	1.68	0.21	0.4	1.55	0.26	0.04	0.15	0.3	0.44	1.8	0.24	hypothetical protein
ETH_00024830	6	0.26	0.43	1.61	0.27	0.27	1.9	0.14	0.43	1.53	0.28	0.42	1.45	0.29	0.04	0.15	0.29	0.44	1.63	0.27	WD domain, G-beta repeat-containing protein, putative
ETH_00004675	3	0.26	na	na	na	na	na	na	na	na	na	0.51	1.6	0.32	0.01	0.14	0.09	0.37	1.01	0.37	hypothetical protein
ETH_00009105	3	0.26	0.51	2.54	0.2	NaN	NaN	NaN	NaN	NaN	NaN	0.73	2.09	0.35	0.02	0.09	0.22	NaN	NaN	NaN	DNA polymerase alpha catalytic subunit, putative
ETH_00023915	5	0.26	na	na	na	0.51	1.51	0.34	0.49	2.19	0.22	0.42	1.83	0.23	0.03	0.15	0.19	0.58	1.91	0.3	hypothetical protein
ETH_00027125	5	0.26	0.59	2.57	0.23	0.56	2.19	0.25	NaN	NaN	NaN	1.1	3.26	0.34	0.03	0.15	0.22	0.53	2.25	0.24	hypothetical protein
ETH_00018665	1	0.26	na	na	na	na	na	na	na	na	na	na	na	na	0.03	0.13	0.26	na	na	na	hypothetical protein
ETH_00043190	1	0.26	na	na	na	na	na	na	na	na	na	na	na	na	0.04	0.15	0.26	na	na	na	hypothetical protein
ETH_00034625	2	0.26	na	na	na	na	na	na	NaN	NaN	NaN	0.21	1.99	0.11	0.04	0.1	0.41	na	na	na	hypothetical protein, conserved
ETH_00005095	2	0.26	na	na	na	na	na	na	na	na	na	0.32	2.06	0.16	0.04	0.1	0.36	NaN	NaN	NaN	hypothetical protein
ETH_00019230	6	0.26	0.28	1.26	0.22	0.34	1.29	0.26	0.34	1.37	0.25	0.29	1.05	0.28	0.02	0.09	0.22	0.45	1.52	0.3	hypothetical protein, conserved
ETH_00020235	6	0.26	0.31	1.21	0.26	0.3	1.22	0.24	0.3	1.4	0.21	0.29	1.17	0.25	0.04	0.1	0.35	0.3	1.37	0.22	WD-repeat protein, putative
ETH_00003050	1	0.26	NaN	NaN	NaN	NaN	NaN	NaN	NaN	NaN	NaN	NaN	NaN	NaN	0.08	0.3	0.26	na	na	na	hypothetical protein
ETH_00017780	3	0.26	na	na	na	na	na	na	0.42	1.54	0.27	0.5	1.82	0.27	0.02	0.11	0.22	na	na	na	nucleoporin FG repeat-containing protein, putative
ETH_00020660	3	0.26	0.24	4.51	0.05	0.37	2.01	0.18	na	na	na	na	na	na	0.03	0.05	0.53	na	na	na	hypothetical protein, conserved
ETH_00014745	6	0.26	0.33	1.46	0.22	0.33	2.89	0.11	0.32	1.41	0.23	0.48	1.04	0.46	0.04	0.12	0.3	0.37	1.8	0.2	hypothetical protein, conserved
ETH_00018680	6	0.26	0.44	1.99	0.22	0.37	1.84	0.2	0.34	1.45	0.24	0.4	1.21	0.33	0.04	0.16	0.22	0.38	1.18	0.32	vacuolar (H+)-ATPase G subunit domain-containing protein, putative
ETH_00020680	3	0.26	NaN	NaN	NaN	0.44	1.98	0.22	0.57	3.25	0.18	na	na	na	0.05	0.13	0.37	na	na	na	hypothetical protein
ETH_00016430	5	0.26	0.27	1.77	0.15	0.32	1.92	0.17	0.6	2.47	0.24	0.76	1.6	0.47	0.03	0.12	0.25	NaN	NaN	NaN	hypothetical protein
ETH_00034680	3	0.26	0.22	1.66	0.13	na	na	na	0.23	3	0.08	na	na	na	0.02	0.04	0.56	NaN	NaN	NaN	hypothetical protein
ETH_00017985	1	0.26	na	na	na	na	na	na	na	na	na	na	na	na	0.04	0.15	0.26	na	na	na	hypothetical protein
ETH_00040710	6	0.25	0.31	0.95	0.33	0.27	1.08	0.25	0.27	1.8	0.15	0.34	1.8	0.19	0.07	0.21	0.34	0.37	1.39	0.27	hypothetical protein
ETH_00016765	4	0.25	0.25	0.73	0.34	na	na	na	0.31	2.05	0.15	0.27	1.87	0.14	0.08	0.21	0.38	na	na	na	hypothetical protein
ETH_00018725	4	0.25	0.46	1.33	0.35	0.3	1.64	0.18	NaN	NaN	NaN	0.3	2.34	0.13	0.12	0.32	0.36	NaN	NaN	NaN	hypothetical protein
ETH_00000420	6	0.25	0.44	1.38	0.32	0.39	1.44	0.27	0.39	2.15	0.18	0.34	1.57	0.22	0.03	0.06	0.4	0.35	2.49	0.14	hypothetical protein, conserved
ETH_00029520	5	0.25	0.39	1.71	0.23	0.39	2.24	0.17	NaN	NaN	NaN	0.31	1.44	0.21	0.04	0.14	0.29	0.92	2.53	0.36	hypothetical protein, conserved
ETH_00035065	6	0.25	0.15	1.48	0.1	1.02	1.29	0.79	0.21	2.03	0.1	0.15	1.53	0.1	0.01	0.1	0.13	0.72	2.36	0.3	WD-40 repeat-containing protein, putative
ETH_00002600	2	0.25	0.47	1.32	0.36	na	na	na	na	na	na	na	na	na	0.02	0.17	0.15	na	na	na	hypothetical protein, conserved
ETH_00027740	2	0.25	na	na	na	na	na	na	NaN	NaN	NaN	0.15	3.01	0.05	0.29	0.64	0.46	NaN	NaN	NaN	peroxisomal multifunctional enzyme type 2, putative
ETH_00010000	4	0.25	0.49	2.57	0.19	0.37	1.57	0.23	na	na	na	na	na	na	0.03	0.1	0.35	0.37	1.52	0.25	hypothetical protein, conserved
ETH_00029220	5	0.25	na	na	na	0.36	1.58	0.23	0.44	1.79	0.25	0.42	1.58	0.26	0.03	0.11	0.31	0.4	1.81	0.22	small GTP-binding protein, putative
ETH_00005965	4	0.25	na	na	na	0.28	1.1	0.25	0.34	2.39	0.14	na	na	na	0.17	0.29	0.58	0.18	4.85	0.04	selenocysteine lyase, putative
ETH_00031855	1	0.25	na	na	na	na	na	na	na	na	na	na	na	na	0.05	0.18	0.25	na	na	na	hypothetical protein
ETH_00000685	6	0.25	0.41	1.31	0.31	0.39	3.25	0.12	0.36	1.93	0.18	0.36	2.07	0.17	0.04	0.07	0.55	0.34	1.85	0.18	hypothetical protein
ETH_00030325	3	0.25	NaN	NaN	NaN	0.81	3.29	0.24	0.43	1.83	0.23	NaN	NaN	NaN	na	na	na	0.44	1.55	0.28	hypothetical protein
ETH_00011515	5	0.25	0.44	1.85	0.24	0.45	1.45	0.31	0.48	1.33	0.36	NaN	NaN	NaN	0.02	0.16	0.15	0.41	1.9	0.22	hypothetical protein
ETH_00018830	6	0.25	0.53	2.44	0.22	0.47	1.45	0.33	0.53	1.91	0.28	0.39	1.4	0.28	0.09	0.36	0.27	0.38	2.34	0.16	hypothetical protein, conserved
ETH_00014865	2	0.25	0.6	2.4	0.25	na	na	na	na	na	na	na	na	na	0.03	0.13	0.26	na	na	na	hypothetical protein
ETH_00037370	1	0.25	na	na	na	na	na	na	na	na	na	na	na	na	0.03	0.13	0.25	na	na	na	hypothetical protein
ETH_00015835	6	0.25	0.51	2.6	0.2	0.51	2.85	0.18	0.51	2.24	0.23	0.59	2.9	0.2	0.05	0.17	0.33	0.52	1.34	0.39	patatin-like phospholipase domain-containing protein, putative
ETH_00008015	6	0.25	0.48	2.21	0.22	0.45	2.24	0.2	0.52	2.71	0.19	0.56	1.93	0.29	0.02	0.09	0.25	0.64	1.73	0.37	hypothetical protein
ETH_00009395	4	0.25	0.32	2.25	0.14	na	na	na	NaN	NaN	NaN	0.48	2.34	0.21	0.07	0.28	0.25	0.98	2.39	0.41	hypothetical protein, conserved
ETH_00016520	3	0.25	na	na	na	0.43	3.13	0.14	NaN	NaN	NaN	0.5	2.78	0.18	0.05	0.11	0.44	na	na	na	hypothetical protein
ETH_00002965	3	0.25	0.42	2.03	0.21	0.45	1.12	0.4	na	na	na	na	na	na	0.04	0.23	0.15	na	na	na	hypothetical protein, conserved
ETH_00005840	1	0.25	na	na	na	na	na	na	na	na	na	na	na	na	0.09	0.37	0.25	na	na	na	hypothetical protein
ETH_00041695	1	0.25	na	na	na	na	na	na	na	na	na	0.27	1.06	0.25	na	na	na	na	na	na	hypothetical protein
ETH_00005225	5	0.25	0.2	1.51	0.13	0.23	1.53	0.15	0.27	2.07	0.13	na	na	na	0.34	0.51	0.65	0.35	1.72	0.2	WD domain-containing protein, putative
ETH_00001315	3	0.25	NaN	NaN	NaN	NaN	NaN	NaN	0.56	2.27	0.25	0.57	2.47	0.23	0.03	0.12	0.28	NaN	NaN	NaN	hypothetical protein
ETH_00007095	6	0.25	0.3	1.97	0.15	0.46	2.58	0.18	0.33	1.21	0.27	0.41	1.28	0.32	0.04	0.11	0.34	0.43	1.66	0.26	hypothetical protein, conserved
ETH_00009785	3	0.25	na	na	na	na	na	na	0.45	1.2	0.38	0.35	1.14	0.31	0.01	0.17	0.07	na	na	na	hypothetical protein
ETH_00009735	3	0.25	NaN	NaN	NaN	0.52	2.17	0.24	NaN	NaN	NaN	0.55	1.48	0.37	0.02	0.12	0.15	na	na	na	hypothetical protein, conserved
ETH_00005620	3	0.25	na	na	na	0.62	1.39	0.45	na	na	na	na	na	na	0.02	0.16	0.12	0.42	2.19	0.19	hypothetical protein
ETH_00008910	5	0.25	0.47	2.27	0.21	0.39	1.12	0.35	na	na	na	0.58	1.83	0.32	0.05	0.18	0.27	0.56	4.46	0.13	hypothetical protein, conserved
ETH_00024785	5	0.25	0.39	1.98	0.2	0.31	2.57	0.12	0.39	2.04	0.19	0.39	1.33	0.29	0.04	0.1	0.47	NaN	NaN	NaN	hypothetical protein, conserved
ETH_00011080	5	0.25	0.36	1.54	0.23	0.43	1.39	0.31	0.44	2.77	0.16	0.32	1.68	0.19	0.02	0.06	0.37	na	na	na	hypothetical protein, conserved
ETH_00025750	4	0.25	0.36	1.71	0.21	0.63	2.06	0.31	NaN	NaN	NaN	na	na	na	0.02	0.12	0.2	0.43	1.43	0.3	hypothetical protein, conserved
ETH_00016615	5	0.25	0.31	1.31	0.24	0.26	1.15	0.23	0.35	1.25	0.28	0.36	1.11	0.32	0.03	0.17	0.19	na	na	na	hypothetical protein, conserved
ETH_00008845	1	0.25	na	na	na	na	na	na	na	na	na	na	na	na	0.04	0.15	0.25	na	na	na	hypothetical protein
ETH_00039260	3	0.25	0.31	1.33	0.23	0.25	1	0.25	na	na	na	na	na	na	na	na	na	0.4	1.45	0.28	hypothetical protein
ETH_00040595	3	0.25	0.6	4.4	0.14	NaN	NaN	NaN	na	na	na	1.2	2.15	0.56	0.03	0.39	0.06	NaN	NaN	NaN	hypothetical protein, conserved
ETH_00039375	1	0.25	na	na	na	na	na	na	na	na	na	na	na	na	0.04	0.18	0.25	na	na	na	hypothetical protein
ETH_00036855	4	0.25	0.3	2.37	0.13	0.32	1.34	0.24	NaN	NaN	NaN	0.38	1.7	0.22	0.06	0.14	0.42	NaN	NaN	NaN	hypothetical protein
ETH_00034630	6	0.25	0.41	1.84	0.22	0.42	1.54	0.27	0.34	1.87	0.18	0.38	1.5	0.25	0.03	0.13	0.25	0.39	1.15	0.34	hypothetical protein
ETH_00034170	5	0.25	0.49	1.36	0.36	0.33	0.99	0.34	0.66	5.29	0.12	0.29	1.65	0.18	0.03	0.12	0.27	NaN	NaN	NaN	hypothetical protein
ETH_00007065	1	0.25	na	na	na	na	na	na	na	na	na	na	na	na	0.02	0.07	0.25	na	na	na	hypothetical protein, conserved
ETH_00036065	4	0.25	0.31	1.22	0.25	0.37	1.55	0.24	0.29	1.61	0.18	NaN	NaN	NaN	0.03	0.1	0.34	na	na	na	hypothetical protein
ETH_00007125	2	0.25	NaN	NaN	NaN	NaN	NaN	NaN	0.48	2.26	0.21	na	na	na	0.03	0.09	0.29	NaN	NaN	NaN	Nucleolar protein,Nop52 domain containing protein, putative
ETH_00002735	3	0.25	0.07	2.45	0.03	1.07	1.56	0.68	NaN	NaN	NaN	na	na	na	0.01	0.21	0.04	na	na	na	hypothetical protein, conserved
ETH_00040045	2	0.25	0.23	1.11	0.21	NaN	NaN	NaN	NaN	NaN	NaN	na	na	na	0.04	0.14	0.3	na	na	na	hypothetical protein
ETH_00004235	1	0.25	na	na	na	na	na	na	na	na	na	na	na	na	0.04	0.16	0.25	na	na	na	hypothetical protein
ETH_00016800	1	0.25	0.22	0.88	0.25	na	na	na	na	na	na	na	na	na	na	na	na	na	na	na	hypothetical protein
ETH_00028155	6	0.25	0.38	1.82	0.21	0.37	1.79	0.2	0.35	1.72	0.2	0.44	1.51	0.29	0.04	0.12	0.33	0.42	1.52	0.28	hypothetical protein, conserved
ETH_00029675	2	0.25	0.43	2.32	0.19	NaN	NaN	NaN	NaN	NaN	NaN	NaN	NaN	NaN	0.03	0.11	0.32	na	na	na	hypothetical protein
ETH_00011805	4	0.25	0.48	1.85	0.26	NaN	NaN	NaN	0.45	2	0.23	na	na	na	0.04	0.11	0.36	0.41	2.49	0.16	hypothetical protein, conserved
ETH_00018530	1	0.25	na	na	na	na	na	na	na	na	na	na	na	na	0.14	0.56	0.25	na	na	na	esf2 family
ETH_00012880	5	0.25	0.35	2.26	0.16	0.26	1.47	0.18	na	na	na	0.29	1.73	0.17	0.14	0.24	0.57	0.38	2.03	0.19	hypothetical protein, conserved
ETH_00037715	4	0.25	na	na	na	0.65	1.42	0.46	0.3	2.01	0.15	na	na	na	0.03	0.16	0.22	0.19	1.03	0.18	dihydrouridine synthase domain-containing protein, putative
ETH_00018730	3	0.25	NaN	NaN	NaN	0.26	1.29	0.2	na	na	na	0.24	1.72	0.14	0.07	0.18	0.41	NaN	NaN	NaN	hypothetical protein, conserved
ETH_00029235	6	0.25	0.34	1.68	0.2	0.42	1.6	0.26	0.38	1.75	0.22	0.37	1.44	0.25	0.04	0.13	0.31	0.35	1.33	0.26	DEAD/DEAH box helicase, putative
ETH_00034930	1	0.25	na	na	na	na	na	na	na	na	na	na	na	na	0.04	0.18	0.25	na	na	na	sag
ETH_00034000	4	0.25	0.26	0.98	0.27	0.42	1.57	0.27	na	na	na	0.35	1.14	0.31	0.01	0.04	0.16	na	na	na	na
ETH_00031930	5	0.25	0.32	1.42	0.22	0.29	1.28	0.23	0.44	1.51	0.29	na	na	na	0.03	0.1	0.28	0.5	2.21	0.23	DNA repair protein, putative
ETH_00037840	4	0.25	0.44	1.86	0.23	na	na	na	0.36	2.94	0.12	0.9	2.62	0.34	0.07	0.23	0.3	na	na	na	hypothetical protein
ETH_00019915	5	0.25	0.26	2.8	0.09	0.27	1.89	0.14	0.35	2.09	0.17	0.39	1.58	0.25	0.07	0.11	0.61	na	na	na	hypothetical protein, conserved
ETH_00009490	1	0.25	NaN	NaN	NaN	NaN	NaN	NaN	NaN	NaN	NaN	na	na	na	0.03	0.13	0.25	NaN	NaN	NaN	hypothetical protein
ETH_00000580	1	0.25	na	na	na	na	na	na	na	na	na	na	na	na	0.02	0.09	0.25	na	na	na	hypothetical protein
ETH_00020900	1	0.25	na	na	na	na	na	na	na	na	na	na	na	na	0.06	0.23	0.25	na	na	na	hypothetical protein
ETH_00024720	1	0.25	na	na	na	na	na	na	na	na	na	na	na	na	0.03	0.13	0.25	na	na	na	hypothetical protein
ETH_00005025	3	0.25	NaN	NaN	NaN	0.79	3.1	0.25	0.51	1.94	0.26	na	na	na	0.03	0.14	0.24	na	na	na	hypothetical protein
ETH_00008305	2	0.25	NaN	NaN	NaN	na	na	na	na	na	na	0.28	4.4	0.06	0.27	0.62	0.44	na	na	na	myosin regulatory light chain, putative
ETH_00007750	4	0.25	0.39	1.9	0.2	0.62	1.92	0.32	NaN	NaN	NaN	0.51	2.25	0.23	0.03	0.13	0.25	na	na	na	hypothetical protein, conserved
ETH_00021100	5	0.25	0.44	2.18	0.2	0.55	1.64	0.34	0.55	1.8	0.31	0.42	1.85	0.23	0.03	0.14	0.18	na	na	na	OTU-like cysteine protease domain-containing protein, putative
ETH_00016645	2	0.25	0.39	1.79	0.22	NaN	NaN	NaN	NaN	NaN	NaN	NaN	NaN	NaN	0.03	0.12	0.28	na	na	na	hypothetical protein
ETH_00037290	1	0.25	na	na	na	na	na	na	NaN	NaN	NaN	NaN	NaN	NaN	0.13	0.52	0.25	na	na	na	hypothetical protein
ETH_00027035	4	0.25	0.41	1.38	0.3	0.29	1.49	0.19	na	na	na	0.44	1.92	0.23	0.02	0.07	0.28	NaN	NaN	NaN	zinc finger DHHC domain-containing protein, putative
ETH_00033365	3	0.25	0.49	1.92	0.25	na	na	na	NaN	NaN	NaN	na	na	na	0.03	0.11	0.29	0.42	1.98	0.21	hypothetical protein, conserved
ETH_00009005	4	0.25	na	na	na	0.33	1.43	0.23	0.23	1.2	0.19	0.3	1.51	0.2	0.03	0.08	0.38	na	na	na	hypothetical protein
ETH_00030825	6	0.25	0.39	1.37	0.28	0.39	2.45	0.16	0.4	2.01	0.2	0.43	1.67	0.26	0.04	0.13	0.31	0.41	1.42	0.29	hypothetical protein
ETH_00021185	5	0.25	0.46	1.84	0.25	0.5	1.56	0.32	na	na	na	0.44	1.76	0.25	0.06	0.32	0.2	0.48	2.1	0.23	hypothetical protein
ETH_00006645	6	0.25	0.31	1.37	0.22	0.3	1.39	0.22	0.28	1.61	0.17	0.28	1.3	0.21	0.03	0.08	0.38	0.31	1.06	0.29	hypothetical protein
ETH_00026410	4	0.25	0.35	1.8	0.19	0.36	3.3	0.11	NaN	NaN	NaN	0.52	1.45	0.36	0.04	0.11	0.34	na	na	na	hypothetical protein, conserved
ETH_00016950	6	0.25	0.33	1.4	0.24	0.27	1.62	0.16	0.29	2.13	0.14	0.29	1.31	0.22	0.07	0.12	0.54	0.29	1.47	0.2	hypothetical protein
ETH_00030625	6	0.25	0.43	1.94	0.22	0.31	1.21	0.26	0.44	1.71	0.26	0.33	1.46	0.22	0.03	0.12	0.26	0.38	1.39	0.27	hypothetical protein, conserved
ETH_00016650	3	0.25	0.48	1.26	0.38	0.51	3.32	0.15	NaN	NaN	NaN	0.52	2.42	0.22	na	na	na	na	na	na	hypothetical protein
ETH_00013200	3	0.25	0.1	1.25	0.08	NaN	NaN	NaN	0.17	1.98	0.08	na	na	na	0.17	0.28	0.58	na	na	na	hypothetical protein, conserved
ETH_00009390	5	0.25	0.37	1.51	0.24	0.36	1.44	0.25	0.38	1.45	0.26	na	na	na	0.03	0.13	0.21	0.46	1.65	0.28	zinc finger (C3HC4 RING finger) protein, putative
ETH_00023470	1	0.25	NaN	NaN	NaN	NaN	NaN	NaN	NaN	NaN	NaN	NaN	NaN	NaN	0.03	0.14	0.25	NaN	NaN	NaN	hypothetical protein
ETH_00002510	5	0.25	0.57	1.86	0.3	0.58	2.67	0.22	0.56	2.55	0.22	NaN	NaN	NaN	0.08	0.28	0.28	0.54	2.47	0.22	hypothetical protein
ETH_00019695	1	0.25	na	na	na	na	na	na	na	na	na	na	na	na	0.03	0.13	0.25	na	na	na	hypothetical protein
ETH_00031425	1	0.25	na	na	na	na	na	na	na	na	na	na	na	na	0.05	0.2	0.25	na	na	na	hypothetical protein
ETH_00043000	3	0.25	0.17	2.64	0.06	0.15	1.99	0.08	NaN	NaN	NaN	na	na	na	0.14	0.23	0.61	na	na	na	hypothetical protein
ETH_00023230	3	0.25	0.35	1.54	0.23	na	na	na	0.39	1.78	0.22	0.55	1.84	0.3	na	na	na	na	na	na	hypothetical protein
ETH_00005575	1	0.25	na	na	na	na	na	na	na	na	na	na	na	na	0.04	0.16	0.25	na	na	na	hypothetical protein
ETH_00024865	6	0.25	0.41	2.04	0.2	0.39	1.58	0.25	0.4	1.55	0.26	0.33	1.58	0.21	0.13	0.27	0.46	0.46	4.06	0.11	leucine rich repeat containing protein / ankyrin repeat containing protein, putative
ETH_00039625	6	0.25	0.37	1.3	0.29	0.54	1.87	0.29	0.39	3.69	0.11	0.32	1.18	0.27	0.02	0.08	0.22	0.51	1.6	0.32	hypothetical protein
ETH_00015405	5	0.25	0.28	1.42	0.2	na	na	na	0.41	2.11	0.2	0.78	1.57	0.5	0.02	0.14	0.14	0.38	1.83	0.21	hypothetical protein
ETH_00008575	1	0.25	NaN	NaN	NaN	0.52	2.09	0.25	NaN	NaN	NaN	NaN	NaN	NaN	na	na	na	NaN	NaN	NaN	hypothetical protein
ETH_00040185	2	0.25	NaN	NaN	NaN	0.5	2.09	0.24	NaN	NaN	NaN	na	na	na	0.08	0.31	0.26	NaN	NaN	NaN	na
ETH_00024305	4	0.25	0.44	1.81	0.25	0.38	1.79	0.21	0.41	2	0.21	na	na	na	0.04	0.11	0.33	na	na	na	hypothetical protein, conserved
ETH_00012875	3	0.25	na	na	na	0.33	1.02	0.33	na	na	na	0.45	1.68	0.27	na	na	na	0.42	2.86	0.15	hypothetical protein
ETH_00005390	3	0.25	0.29	1.74	0.17	na	na	na	na	na	na	0.41	1.44	0.28	0.03	0.09	0.29	na	na	na	hypothetical protein, conserved
ETH_00007205	3	0.25	NaN	NaN	NaN	NaN	NaN	NaN	0.19	3.26	0.06	na	na	na	0.05	0.08	0.57	0.28	2.48	0.11	hypothetical protein, conserved
ETH_00004565	3	0.25	0.49	1.91	0.26	0.47	1.77	0.26	na	na	na	na	na	na	0.12	0.52	0.22	na	na	na	hypothetical protein
ETH_00024735	1	0.25	na	na	na	na	na	na	na	na	na	na	na	na	0.03	0.14	0.25	na	na	na	leucine carboxyl methyltransferase, putative
ETH_00035485	1	0.25	na	na	na	na	na	na	na	na	na	na	na	na	0.04	0.16	0.25	na	na	na	hypothetical protein
ETH_00003680	4	0.25	0.42	2.64	0.16	0.38	1.34	0.28	0.46	2.57	0.18	na	na	na	0.04	0.11	0.37	na	na	na	hypothetical protein, conserved
ETH_00021735	5	0.25	0.44	1.34	0.33	0.56	1.98	0.28	0.32	1.47	0.22	0.23	3.42	0.07	na	na	na	0.27	0.79	0.34	hypothetical protein
ETH_00035835	5	0.25	0.28	0.97	0.29	0.28	1.08	0.26	0.22	1.36	0.16	0.34	1.33	0.25	0.02	0.08	0.28	na	na	na	hypothetical protein
ETH_00033420	2	0.25	na	na	na	na	na	na	na	na	na	0.23	1.28	0.18	0.03	0.09	0.31	na	na	na	hypothetical protein
ETH_00011505	2	0.25	0.35	2.17	0.16	na	na	na	na	na	na	na	na	na	0.04	0.13	0.34	na	na	na	hypothetical protein
ETH_00013265	3	0.25	na	na	na	0.35	1.69	0.21	NaN	NaN	NaN	0.41	1.7	0.24	0.05	0.17	0.29	na	na	na	hypothetical protein, conserved
ETH_00008010	3	0.25	na	na	na	na	na	na	NaN	NaN	NaN	0.43	2.37	0.18	0.03	0.1	0.35	0.63	3.06	0.21	PAN domain-containing protein, putative
ETH_00014815	6	0.25	0.43	2.1	0.2	0.47	2.02	0.23	0.43	2.09	0.21	0.42	1.7	0.25	0.04	0.11	0.35	0.45	1.89	0.24	hypothetical protein, conserved
ETH_00010470	2	0.25	0.41	3.06	0.13	na	na	na	na	na	na	na	na	na	0.04	0.11	0.36	NaN	NaN	NaN	hypothetical protein, conserved
ETH_00029840	1	0.25	NaN	NaN	NaN	na	na	na	na	na	na	na	na	na	0.06	0.24	0.25	na	na	na	hypothetical protein, conserved
ETH_00028350	6	0.25	0.52	1.61	0.32	0.51	2.18	0.23	0.48	2.53	0.19	0.48	2.23	0.22	0.06	0.23	0.27	0.48	1.92	0.25	GRA9 protein, putative
ETH_00023675	3	0.25	0.46	2.85	0.16	0.58	2.05	0.28	0.51	1.73	0.29	na	na	na	na	na	na	NaN	NaN	NaN	hypothetical protein
ETH_00020970	4	0.25	0.31	1.51	0.21	na	na	na	0.35	1.81	0.19	0.35	1.47	0.24	0.04	0.11	0.35	NaN	NaN	NaN	NAD-dependent DNA ligase OB-fold domain containing protein, putative
ETH_00027480	6	0.25	0.53	1.75	0.3	0.4	1.83	0.22	0.53	1.78	0.3	0.48	1.99	0.24	0.05	0.2	0.25	0.42	2.49	0.17	hypothetical protein
ETH_00007085	4	0.25	0.23	1.22	0.19	0.72	2.33	0.31	0.23	1.42	0.16	na	na	na	0.04	0.11	0.32	na	na	na	biotin-[acetyl-CoA-carboxylase] ligase, putative
ETH_00031890	3	0.25	NaN	NaN	NaN	NaN	NaN	NaN	0.5	2.63	0.19	NaN	NaN	NaN	0.04	0.16	0.28	0.49	1.79	0.28	hypothetical protein, conserved
ETH_00012535	1	0.25	na	na	na	na	na	na	na	na	na	na	na	na	0.07	0.27	0.25	na	na	na	hypothetical protein
ETH_00006435	5	0.25	0.4	1.75	0.23	0.41	1.9	0.21	0.43	1.99	0.22	na	na	na	0.04	0.1	0.38	0.4	2.04	0.19	hypothetical protein, conserved
ETH_00015490	4	0.25	0.42	1.95	0.21	na	na	na	na	na	na	0.43	1.87	0.23	0.02	0.11	0.22	0.52	1.58	0.33	hypothetical protein
ETH_00010030	2	0.25	na	na	na	na	na	na	0.3	1.49	0.2	na	na	na	0.01	0.04	0.29	na	na	na	hypothetical protein
ETH_00013435	6	0.25	0.24	1.14	0.21	0.32	0.95	0.33	0.23	1.86	0.12	0.22	0.96	0.23	0.09	0.24	0.36	0.33	1.49	0.22	hypothetical protein, conserved
ETH_00013340	4	0.25	na	na	na	0.25	1.55	0.16	NaN	NaN	NaN	0.21	1.27	0.17	0.13	0.24	0.53	0.42	3.25	0.13	DEAD/DEAH box helicase, putative
ETH_00021535	2	0.25	0.26	0.9	0.28	na	na	na	na	na	na	0.25	1.18	0.21	na	na	na	na	na	na	proteasome subunit beta type 1, putative
ETH_00027940	6	0.25	0.33	1.65	0.2	0.31	1.47	0.21	0.4	1.5	0.27	0.33	1.61	0.21	0.05	0.12	0.38	0.35	1.65	0.21	tRNA methyltransferase domain-containing protein, putative
ETH_00027105	5	0.25	0.23	1.19	0.2	0.26	1.34	0.19	0.33	1.72	0.19	0.92	2.24	0.41	0.03	0.11	0.24	na	na	na	hypothetical protein
ETH_00010970	6	0.25	0.41	1.51	0.27	0.35	2.58	0.14	0.43	2.11	0.2	0.41	1.87	0.22	0.1	0.2	0.53	0.4	3.38	0.12	hypothetical protein
ETH_00009410	4	0.25	na	na	na	0.27	1.44	0.19	0.41	1.43	0.29	0.34	1.68	0.2	0.03	0.1	0.31	NaN	NaN	NaN	hypothetical protein
ETH_00003830	4	0.25	0.25	2.89	0.09	0.34	2.03	0.17	na	na	na	na	na	na	0.15	0.24	0.62	0.14	1.28	0.11	hypothetical protein, conserved
ETH_00000135	4	0.25	na	na	na	na	na	na	0.48	1.84	0.26	0.41	1.7	0.24	0.03	0.13	0.25	0.45	1.98	0.23	hypothetical protein, conserved
ETH_00015390	1	0.25	na	na	na	na	na	na	na	na	na	na	na	na	0.04	0.16	0.25	na	na	na	hypothetical protein
ETH_00034065	5	0.25	0.27	1.22	0.22	0.37	1.07	0.35	0.32	1.63	0.2	0.26	0.91	0.29	na	na	na	0.34	1.97	0.17	hypothetical protein
ETH_00036660	3	0.25	0.45	1.75	0.26	NaN	NaN	NaN	na	na	na	0.61	1.77	0.35	na	na	na	0.4	3.04	0.13	na
[truncated: 3,201 more rows]

## Sheet: E. acervulina vs. others
			E. brunetti			E. maxima			E. mitis			E. necatrix			E. praecox			E. tenella
ID	# comparisons	Mean Ka/Ks	Ka	Ks	Ka/Ks	Ka	Ks	Ka/Ks	Ka	Ks	Ka/Ks	Ka	Ks	Ka/Ks	Ka	Ks	Ka/Ks	Ka	Ks	Ka/Ks	Product
EAH_00062270	1	2.68	na	na	na	0.01	0	2.68	na	na	na	na	na	na	na	na	na	na	na	na	GFP-like fluorescent chromoprotein FP506, related
EAH_00065190	1	1.2	na	na	na	na	na	na	0.49	0.41	1.2	na	na	na	na	na	na	na	na	na	hypothetical protein, conserved
EAH_00068360	2	0.93	0.27	0.34	0.79	na	na	na	na	na	na	na	na	na	0.25	0.24	1.06	na	na	na	hypothetical protein, conserved
EAH_00035200	1	0.76	0.55	0.72	0.76	na	na	na	na	na	na	na	na	na	na	na	na	na	na	na	hypothetical protein, conserved
EAH_00062260	1	0.75	na	na	na	0.02	0.03	0.75	na	na	na	na	na	na	na	na	na	na	na	na	hypothetical protein, conserved
EAH_00060480	2	0.75	NaN	NaN	NaN	NaN	NaN	NaN	na	na	na	0.92	1.52	0.6	na	na	na	1.34	1.48	0.9	hypothetical protein, conserved
EAH_00021380	1	0.74	NaN	NaN	NaN	na	na	na	na	na	na	0.93	1.26	0.74	na	na	na	NaN	NaN	NaN	diacylglycerol kinase, putative
EAH_00004060	2	0.73	0.58	0.73	0.79	na	na	na	0.63	0.93	0.68	na	na	na	na	na	na	na	na	na	hypothetical protein, conserved
EAH_00039810	1	0.71	NaN	NaN	NaN	1.06	1.49	0.71	na	na	na	na	na	na	na	na	na	NaN	NaN	NaN	hypothetical protein, conserved
EAH_00038000	1	0.7	0.66	0.95	0.7	na	na	na	na	na	na	na	na	na	na	na	na	na	na	na	hypothetical protein, conserved
EAH_00062750	2	0.69	na	na	na	0.98	1.16	0.84	na	na	na	1.25	2.38	0.53	na	na	na	NaN	NaN	NaN	nucleolar GTP-binding protein, putative
EAH_00016130	2	0.69	na	na	na	na	na	na	0.53	0.8	0.66	na	na	na	0.49	0.67	0.73	na	na	na	hypothetical protein, conserved
EAH_00019370	1	0.68	na	na	na	na	na	na	na	na	na	na	na	na	0.43	0.63	0.68	na	na	na	hypothetical protein, conserved
EAH_00056880	1	0.66	na	na	na	na	na	na	0.58	0.88	0.66	na	na	na	na	na	na	na	na	na	hypothetical protein, conserved
EAH_00013780	2	0.66	0.63	1.11	0.57	0.55	0.73	0.75	na	na	na	na	na	na	na	na	na	na	na	na	hypothetical protein, conserved
EAH_00032850	2	0.65	0.58	0.88	0.66	na	na	na	0.45	0.7	0.64	na	na	na	na	na	na	na	na	na	hypothetical protein, conserved
EAH_00031440	1	0.65	0.55	0.85	0.65	na	na	na	na	na	na	na	na	na	na	na	na	na	na	na	hypothetical protein, conserved
EAH_00029090	1	0.65	0.42	0.65	0.65	na	na	na	na	na	na	na	na	na	na	na	na	na	na	na	hypothetical protein, conserved
EAH_00022570	5	0.65	0.55	0.63	0.88	0.59	0.71	0.83	0.52	0.77	0.67	0.88	2.84	0.31	0.44	0.83	0.53	na	na	na	hypothetical protein, conserved
EAH_00063910	2	0.64	0.55	0.82	0.67	0.58	0.93	0.62	na	na	na	na	na	na	na	na	na	na	na	na	hypothetical protein, conserved
EAH_00037570	1	0.64	na	na	na	na	na	na	0.57	0.89	0.64	na	na	na	na	na	na	na	na	na	hypothetical protein, conserved
EAH_00000160	4	0.64	0.42	0.7	0.6	0.44	0.78	0.57	0.38	0.63	0.61	na	na	na	0.42	0.52	0.8	na	na	na	hypothetical protein, conserved
EAH_00058360	1	0.63	na	na	na	na	na	na	na	na	na	na	na	na	0.61	0.97	0.63	na	na	na	hypothetical protein, conserved
EAH_00055460	1	0.63	na	na	na	na	na	na	0.59	0.94	0.63	na	na	na	na	na	na	na	na	na	hypothetical protein, conserved
EAH_00022240	4	0.63	0.38	0.61	0.62	0.43	0.68	0.63	0.36	0.59	0.61	na	na	na	0.35	0.53	0.65	na	na	na	hypothetical protein, conserved
EAH_00044740	1	0.62	na	na	na	1.06	1.72	0.62	na	na	na	na	na	na	na	na	na	na	na	na	mitochondrial carrier domain-containing protein, putative
EAH_00043400	1	0.62	na	na	na	na	na	na	0.47	0.76	0.62	na	na	na	na	na	na	na	na	na	hypothetical protein, conserved
EAH_00041070	3	0.62	0.46	0.77	0.59	na	na	na	0.66	0.96	0.69	na	na	na	0.39	0.66	0.59	na	na	na	hypothetical protein, conserved
EAH_00034030	4	0.62	0.76	1.14	0.67	0.8	0.94	0.86	na	na	na	0.85	1.93	0.44	0.66	1.29	0.51	na	na	na	esf1 family
EAH_00045800	1	0.61	na	na	na	na	na	na	na	na	na	1	1.64	0.61	na	na	na	na	na	na	NOT2 / NOT3 / NOT5 family domain-containing protein, putative
EAH_00041020	3	0.61	1.16	1.57	0.74	na	na	na	na	na	na	0.7	1.03	0.68	na	na	na	0.51	1.27	0.4	zinc finger MYND domain-containing protein, putative
EAH_00060720	2	0.6	0.32	2.17	0.15	na	na	na	0.6	0.58	1.05	NaN	NaN	NaN	na	na	na	NaN	NaN	NaN	GPI-anchor transamidase, putative
EAH_00057150	4	0.6	0.41	0.68	0.59	0.45	0.66	0.69	0.46	0.65	0.7	na	na	na	0.32	0.79	0.4	na	na	na	hypothetical protein, conserved
EAH_00044520	1	0.59	na	na	na	na	na	na	na	na	na	na	na	na	0.47	0.79	0.59	na	na	na	hypothetical protein, conserved
EAH_00040470	4	0.59	0.45	0.79	0.57	0.49	0.78	0.63	0.43	0.76	0.56	na	na	na	0.41	0.67	0.61	na	na	na	hypothetical protein, conserved
EAH_00039790	3	0.59	0.34	1.17	0.29	na	na	na	0.36	0.84	0.43	0.78	0.73	1.06	na	na	na	na	na	na	hypothetical protein, conserved
EAH_00032870	4	0.59	0.46	0.65	0.7	0.45	0.84	0.53	0.38	0.67	0.56	na	na	na	0.51	0.92	0.56	na	na	na	hypothetical protein, conserved
EAH_00019390	3	0.59	0.43	0.8	0.54	na	na	na	0.46	0.88	0.52	na	na	na	0.4	0.56	0.72	na	na	na	hypothetical protein, conserved
EAH_00019360	2	0.59	na	na	na	na	na	na	0.42	0.76	0.55	na	na	na	0.39	0.63	0.62	na	na	na	hypothetical protein, conserved
EAH_00001140	2	0.59	na	na	na	na	na	na	0.33	0.51	0.65	na	na	na	0.39	0.73	0.53	na	na	na	hypothetical protein, conserved
EAH_00064460	4	0.58	0.54	0.62	0.87	0.48	0.94	0.51	0.99	4.39	0.23	na	na	na	0.5	0.71	0.7	na	na	na	hypothetical protein, conserved
EAH_00059720	2	0.58	na	na	na	0.51	0.79	0.64	na	na	na	na	na	na	0.37	0.72	0.51	na	na	na	hypothetical protein, conserved
EAH_00056380	1	0.58	na	na	na	na	na	na	na	na	na	na	na	na	0.54	0.93	0.58	na	na	na	hypothetical protein, conserved
EAH_00039230	2	0.58	na	na	na	0.55	1.09	0.51	na	na	na	na	na	na	0.47	0.73	0.65	na	na	na	hypothetical protein, conserved
EAH_00038970	2	0.58	na	na	na	na	na	na	1.01	2.11	0.48	na	na	na	0.93	1.37	0.68	NaN	NaN	NaN	ATP-citrate synthase, putative
EAH_00025530	1	0.58	na	na	na	na	na	na	na	na	na	na	na	na	0.44	0.75	0.58	na	na	na	hypothetical protein, conserved
EAH_00016090	5	0.58	0.13	0.56	0.23	na	na	na	0.14	0.59	0.24	1.29	1.25	1.04	0.19	0.46	0.4	1.27	1.3	0.98	hypothetical protein, conserved
EAH_00065120	4	0.57	0.49	0.66	0.74	0.49	0.88	0.56	0.44	0.67	0.65	na	na	na	0.97	2.94	0.33	na	na	na	hypothetical protein, conserved
EAH_00062180	2	0.57	na	na	na	0.5	0.72	0.69	na	na	na	na	na	na	0.47	1.04	0.45	na	na	na	hypothetical protein, conserved
EAH_00061250	3	0.57	0.38	1.03	0.37	na	na	na	0.36	0.61	0.59	0.97	1.32	0.73	na	na	na	NaN	NaN	NaN	hypothetical protein, conserved
EAH_00039240	3	0.57	NaN	NaN	NaN	0.47	0.7	0.67	0.65	1.17	0.55	na	na	na	0.35	0.73	0.48	na	na	na	hypothetical protein, conserved
EAH_00029670	3	0.57	0.66	0.87	0.76	na	na	na	0.52	1.31	0.39	na	na	na	0.47	0.82	0.57	na	na	na	hypothetical protein, conserved
EAH_00022580	3	0.57	na	na	na	0.46	0.65	0.7	0.4	0.82	0.49	na	na	na	0.4	0.78	0.51	na	na	na	hypothetical protein, conserved
EAH_00011550	2	0.57	na	na	na	na	na	na	na	na	na	0.83	1.62	0.51	0.52	0.83	0.63	na	na	na	hypothetical protein, conserved
EAH_00058820	1	0.56	1.1	1.95	0.56	na	na	na	na	na	na	NaN	NaN	NaN	na	na	na	NaN	NaN	NaN	CAM kinase, CDPK family TgTOXPK2, putative
EAH_00042910	5	0.56	na	na	na	0.32	0.58	0.56	0.28	0.51	0.54	0.55	1.26	0.44	0.3	0.38	0.79	0.52	1.11	0.46	hypothetical protein, conserved
EAH_00030330	3	0.56	0.42	0.79	0.53	0.41	0.7	0.59	0.41	0.73	0.56	na	na	na	na	na	na	na	na	na	Proteophosphoglycan 5, related
EAH_00025710	2	0.56	0.5	0.95	0.53	0.57	0.95	0.6	na	na	na	na	na	na	na	na	na	na	na	na	hypothetical protein, conserved
EAH_00015940	2	0.56	na	na	na	0.45	0.73	0.61	na	na	na	na	na	na	0.33	0.64	0.51	na	na	na	hypothetical protein, conserved
EAH_00008770	5	0.56	0.34	0.61	0.55	na	na	na	0.31	0.49	0.63	0.68	1.31	0.52	0.29	0.56	0.51	0.73	1.21	0.6	hypothetical protein, conserved
EAH_00049630	1	0.55	0.31	0.56	0.55	na	na	na	na	na	na	na	na	na	na	na	na	na	na	na	hypothetical protein, conserved
EAH_00038010	1	0.55	na	na	na	0.54	0.98	0.55	na	na	na	na	na	na	na	na	na	na	na	na	methionine aminopeptidase, putative
EAH_00012840	1	0.55	na	na	na	0.45	0.82	0.55	na	na	na	na	na	na	na	na	na	na	na	na	hypothetical protein, conserved
EAH_00005100	2	0.55	na	na	na	na	na	na	0.38	0.69	0.56	na	na	na	0.37	0.7	0.53	na	na	na	hypothetical protein, conserved
EAH_00005040	2	0.55	0.6	1.52	0.4	na	na	na	na	na	na	0.91	1.31	0.7	na	na	na	NaN	NaN	NaN	Alpha amylase, catalytic domain containing protein, putative
EAH_00049970	1	0.54	na	na	na	na	na	na	0.31	0.57	0.54	na	na	na	na	na	na	na	na	na	hypothetical protein, conserved
EAH_00045980	3	0.54	NaN	NaN	NaN	1.03	1.18	0.87	0.28	0.78	0.35	NaN	NaN	NaN	0.59	1.49	0.39	NaN	NaN	NaN	mRNA (2'-O-methyladenosine-N(6)-)-methyltransferase, putative
EAH_00027530	1	0.54	na	na	na	na	na	na	NaN	NaN	NaN	0.39	0.73	0.54	NaN	NaN	NaN	NaN	NaN	NaN	guanylate kinase, putative
EAH_00019680	1	0.54	na	na	na	na	na	na	na	na	na	na	na	na	0.45	0.83	0.54	na	na	na	hypothetical protein, conserved
EAH_00019670	2	0.54	na	na	na	0.57	1.27	0.45	0.56	0.88	0.63	na	na	na	na	na	na	na	na	na	hypothetical protein, conserved
EAH_00019200	5	0.54	0.48	0.8	0.6	0.46	0.7	0.65	na	na	na	0.7	1.59	0.44	0.39	0.78	0.5	0.72	1.46	0.49	hypothetical protein, conserved
EAH_00007590	6	0.54	0.38	0.69	0.54	0.46	0.68	0.67	0.35	0.65	0.54	0.79	1.67	0.47	0.39	0.59	0.66	0.79	2.24	0.35	hypothetical protein, conserved
EAH_00053310	4	0.53	0.37	0.74	0.5	0.4	0.74	0.54	0.39	0.63	0.63	na	na	na	0.35	0.77	0.45	na	na	na	hypothetical protein, conserved
EAH_00045450	1	0.53	NaN	NaN	NaN	na	na	na	0.92	1.74	0.53	NaN	NaN	NaN	na	na	na	NaN	NaN	NaN	hypothetical protein, conserved
EAH_00041420	1	0.53	1.31	2.46	0.53	na	na	na	na	na	na	NaN	NaN	NaN	na	na	na	NaN	NaN	NaN	peroxisomal catalase, putative
EAH_00032030	3	0.53	0.58	1.32	0.44	0.59	1.11	0.53	na	na	na	NaN	NaN	NaN	0.5	0.8	0.62	na	na	na	hypothetical protein, conserved
EAH_00022330	5	0.53	na	na	na	0.67	1.03	0.65	0.7	1.04	0.67	0.91	2.2	0.41	0.58	0.82	0.7	0.87	3.8	0.23	hypothetical protein, conserved
EAH_00015780	6	0.53	0.52	0.99	0.52	0.5	0.9	0.56	0.49	0.73	0.68	0.81	2.09	0.39	0.44	0.76	0.58	0.76	1.74	0.44	esf1 family
EAH_00012560	6	0.53	0.55	0.89	0.62	0.42	0.74	0.57	0.47	0.79	0.59	0.65	1.94	0.33	0.51	0.85	0.61	0.71	1.52	0.47	hypothetical protein, conserved
EAH_00005060	4	0.53	0.59	1.05	0.56	0.52	1.05	0.49	0.48	1.22	0.4	na	na	na	0.51	0.77	0.67	na	na	na	hypothetical protein, conserved
EAH_00003150	4	0.53	na	na	na	0.32	0.51	0.63	0.34	0.63	0.53	na	na	na	0.3	0.67	0.44	0.45	0.86	0.53	hypothetical protein, conserved
EAH_00058550	2	0.52	na	na	na	0.46	0.82	0.57	na	na	na	na	na	na	0.34	0.71	0.48	na	na	na	hypothetical protein, conserved
EAH_00052730	1	0.52	na	na	na	na	na	na	0.41	0.78	0.52	na	na	na	na	na	na	na	na	na	hypothetical protein, conserved
EAH_00052660	1	0.52	na	na	na	na	na	na	na	na	na	na	na	na	0.45	0.86	0.52	na	na	na	hypothetical protein, conserved
EAH_00046520	1	0.52	0.38	0.73	0.52	na	na	na	na	na	na	na	na	na	na	na	na	na	na	na	hypothetical protein, conserved
EAH_00036160	2	0.52	0.37	0.63	0.6	na	na	na	0.42	0.94	0.45	na	na	na	na	na	na	na	na	na	hypothetical protein, conserved
EAH_00021260	4	0.52	0.51	0.97	0.53	0.46	0.94	0.49	0.48	1.08	0.44	na	na	na	0.75	1.21	0.63	na	na	na	hypothetical protein, conserved
EAH_00002310	1	0.52	na	na	na	na	na	na	0.27	0.51	0.52	na	na	na	na	na	na	na	na	na	hypothetical protein, conserved
EAH_00064650	5	0.51	0.47	0.74	0.64	0.42	0.76	0.55	na	na	na	0.68	1.89	0.36	0.36	0.73	0.49	0.68	1.36	0.5	esf1 family
EAH_00059080	2	0.51	0.95	1.75	0.54	na	na	na	0.93	1.95	0.48	NaN	NaN	NaN	na	na	na	NaN	NaN	NaN	hypothetical protein, conserved
EAH_00039580	4	0.51	0.3	0.65	0.47	0.3	0.69	0.44	0.38	0.59	0.65	na	na	na	0.28	0.58	0.48	na	na	na	hypothetical protein, conserved
EAH_00037220	4	0.51	0.35	0.83	0.42	0.39	0.74	0.53	0.35	0.61	0.57	na	na	na	0.56	1.07	0.52	na	na	na	hypothetical protein, conserved
EAH_00019380	4	0.51	0.39	0.59	0.67	0.36	0.74	0.48	0.33	0.66	0.51	na	na	na	0.29	0.77	0.37	na	na	na	hypothetical protein, conserved
EAH_00019070	6	0.51	0.48	0.87	0.55	0.38	0.69	0.56	0.47	0.78	0.6	0.66	1.7	0.39	0.32	0.61	0.53	0.64	1.45	0.44	hypothetical protein, conserved
EAH_00013800	2	0.51	0.37	0.84	0.44	na	na	na	0.43	0.74	0.59	na	na	na	na	na	na	na	na	na	hypothetical protein, conserved
EAH_00009950	2	0.51	na	na	na	na	na	na	0.78	2.35	0.33	na	na	na	0.59	0.85	0.69	na	na	na	hypothetical protein, conserved
EAH_00004430	5	0.51	0.54	0.86	0.62	na	na	na	0.52	0.8	0.65	0.9	2.82	0.32	0.53	0.78	0.68	0.91	3.34	0.27	hypothetical protein, conserved
EAH_00003930	4	0.51	0.51	0.95	0.53	0.46	0.72	0.64	0.79	1.84	0.43	na	na	na	0.36	0.84	0.42	na	na	na	hypothetical protein, conserved
EAH_00051180	2	0.5	0.19	2.9	0.07	NaN	NaN	NaN	NaN	NaN	NaN	NaN	NaN	NaN	1.01	1.08	0.93	NaN	NaN	NaN	hypothetical protein, conserved
EAH_00038450	4	0.5	0.4	1.2	0.33	na	na	na	na	na	na	0.63	1.39	0.45	0.64	1.9	0.34	0.7	0.8	0.88	4-hydroxybenzoate octaprenyltransferase, putative
EAH_00036020	3	0.5	0.37	0.73	0.51	0.38	0.67	0.56	0.35	0.82	0.43	na	na	na	na	na	na	na	na	na	hypothetical protein, conserved
EAH_00015590	4	0.5	0.4	0.64	0.63	0.46	0.77	0.6	na	na	na	NaN	NaN	NaN	0.43	1.02	0.42	0.56	1.62	0.35	hypothetical protein, conserved
EAH_00012570	4	0.5	0.39	0.94	0.42	0.42	0.67	0.63	0.43	0.78	0.55	na	na	na	0.36	0.91	0.4	na	na	na	hypothetical protein, conserved
EAH_00012550	4	0.5	0.44	0.94	0.47	0.41	0.77	0.53	0.41	0.7	0.59	na	na	na	0.5	1.21	0.41	na	na	na	hypothetical protein, conserved
EAH_00010660	2	0.5	0.38	0.62	0.62	0.38	0.97	0.39	na	na	na	na	na	na	na	na	na	na	na	na	hypothetical protein, conserved
EAH_00004030	1	0.5	na	na	na	na	na	na	na	na	na	na	na	na	0.06	0.12	0.5	na	na	na	hypothetical protein, conserved
EAH_00000600	3	0.5	0.37	0.89	0.42	na	na	na	0.4	0.81	0.5	NaN	NaN	NaN	0.39	0.65	0.59	na	na	na	hypothetical protein, conserved
EAH_00053320	1	0.49	na	na	na	na	na	na	na	na	na	na	na	na	0.59	1.2	0.49	na	na	na	hypothetical protein, conserved
EAH_00053140	4	0.49	0.51	1.39	0.37	0.39	0.77	0.51	0.41	0.66	0.62	na	na	na	0.37	0.77	0.48	na	na	na	hypothetical protein, conserved
EAH_00045360	3	0.49	0.45	0.98	0.46	na	na	na	0.38	0.92	0.41	na	na	na	0.35	0.58	0.6	na	na	na	hypothetical protein, conserved
EAH_00036810	4	0.49	na	na	na	na	na	na	0.18	0.78	0.23	0.86	1.52	0.57	0.79	1.94	0.4	1.08	1.47	0.74	hypothetical protein, conserved
EAH_00033180	6	0.49	0.3	0.72	0.42	0.42	0.81	0.52	0.4	0.76	0.53	0.64	1.78	0.36	0.45	0.67	0.67	0.68	1.65	0.41	hypothetical protein, conserved
EAH_00032090	1	0.49	na	na	na	na	na	na	0.86	1.75	0.49	na	na	na	na	na	na	na	na	na	hypothetical protein, conserved
EAH_00030750	4	0.49	0.38	1.11	0.35	0.42	0.76	0.55	0.47	1.02	0.46	na	na	na	0.63	1.08	0.58	na	na	na	hypothetical protein, conserved
EAH_00022310	3	0.49	na	na	na	0.49	1.08	0.46	0.38	0.79	0.48	na	na	na	0.44	0.82	0.53	na	na	na	hypothetical protein, conserved
EAH_00020590	1	0.49	na	na	na	0.58	1.19	0.49	na	na	na	na	na	na	na	na	na	na	na	na	hypothetical protein, conserved
EAH_00019400	4	0.49	0.68	1.1	0.61	0.61	1.1	0.55	na	na	na	0.79	1.92	0.41	na	na	na	0.78	2.05	0.38	hypothetical protein, conserved
EAH_00017650	6	0.49	0.31	0.64	0.49	0.37	0.57	0.64	0.31	0.68	0.45	0.7	1.4	0.5	0.28	0.71	0.39	0.64	1.31	0.49	hypothetical protein, conserved
EAH_00012070	2	0.49	na	na	na	0.38	0.83	0.46	0.44	0.86	0.51	na	na	na	na	na	na	na	na	na	hypothetical protein, conserved
EAH_00002280	2	0.49	na	na	na	0.51	0.87	0.58	na	na	na	NaN	NaN	NaN	0.3	0.76	0.39	NaN	NaN	NaN	hypothetical protein, conserved
EAH_00001560	6	0.49	0.51	0.85	0.59	0.58	1.22	0.48	0.52	0.93	0.56	0.78	1.91	0.41	0.51	0.98	0.52	0.85	2.34	0.36	esf1 family
EAH_00063510	4	0.48	0.29	0.87	0.34	0.26	0.61	0.42	0.97	0.96	1.01	na	na	na	0.29	1.7	0.17	na	na	na	hypothetical protein, conserved
EAH_00056340	1	0.48	na	na	na	na	na	na	0.24	0.5	0.48	NaN	NaN	NaN	na	na	na	NaN	NaN	NaN	hypothetical protein, conserved
EAH_00055300	4	0.48	0.41	1.06	0.38	0.4	0.83	0.49	0.4	0.82	0.49	na	na	na	0.47	0.87	0.54	na	na	na	hypothetical protein, conserved
EAH_00051900	3	0.48	0.38	1.21	0.32	na	na	na	0.34	0.64	0.54	na	na	na	0.4	0.67	0.6	na	na	na	hypothetical protein, conserved
EAH_00050010	3	0.48	NaN	NaN	NaN	0.71	1.19	0.6	na	na	na	na	na	na	0.21	1.26	0.17	1.12	1.66	0.68	cullin homog, putative
EAH_00044600	1	0.48	na	na	na	0.52	1.07	0.48	na	na	na	na	na	na	na	na	na	na	na	na	hypothetical protein, conserved
EAH_00044460	1	0.48	na	na	na	0.58	1.21	0.48	na	na	na	na	na	na	na	na	na	na	na	na	hypothetical protein, conserved
EAH_00038590	2	0.48	0.38	0.61	0.62	0.46	1.31	0.35	na	na	na	na	na	na	na	na	na	na	na	na	hypothetical protein, conserved
EAH_00035380	1	0.48	na	na	na	na	na	na	na	na	na	na	na	na	0.44	0.91	0.48	na	na	na	hypothetical protein, conserved
EAH_00033500	1	0.48	NaN	NaN	NaN	NaN	NaN	NaN	NaN	NaN	NaN	NaN	NaN	NaN	1.14	2.4	0.48	NaN	NaN	NaN	DNA photolyase, putative
EAH_00023610	1	0.48	na	na	na	0.45	0.94	0.48	na	na	na	na	na	na	na	na	na	na	na	na	hypothetical protein, conserved
EAH_00017530	4	0.48	0.39	1.04	0.37	0.46	0.73	0.63	0.43	0.82	0.52	NaN	NaN	NaN	0.38	0.93	0.41	NaN	NaN	NaN	hypothetical protein, conserved
EAH_00012080	6	0.48	0.33	0.7	0.47	0.38	0.68	0.55	0.33	0.67	0.49	0.69	1.54	0.45	0.29	0.62	0.46	0.72	1.59	0.45	hypothetical protein, conserved
EAH_00011230	4	0.48	0.44	0.93	0.47	0.36	0.85	0.42	0.37	0.7	0.53	na	na	na	0.33	0.68	0.49	na	na	na	hypothetical protein, conserved
EAH_00007860	2	0.48	na	na	na	0.38	0.78	0.49	na	na	na	na	na	na	0.37	0.78	0.48	na	na	na	hypothetical protein, conserved
EAH_00004940	4	0.48	0.45	0.89	0.5	0.45	0.93	0.48	0.39	0.78	0.5	na	na	na	0.45	1.03	0.43	na	na	na	hypothetical protein, conserved
EAH_00001770	2	0.48	0.57	0.87	0.65	na	na	na	na	na	na	0.8	2.55	0.32	na	na	na	na	na	na	hypothetical protein, conserved
EAH_00051680	2	0.47	na	na	na	na	na	na	na	na	na	1.11	2.1	0.53	na	na	na	0.73	1.76	0.42	hypothetical protein, conserved
EAH_00041560	1	0.47	na	na	na	na	na	na	0.42	0.89	0.47	na	na	na	na	na	na	NaN	NaN	NaN	DNA polymerase, putative
EAH_00038290	2	0.47	na	na	na	NaN	NaN	NaN	0.88	1.08	0.82	NaN	NaN	NaN	0.24	2.11	0.12	NaN	NaN	NaN	chromatin assembly factor 1 subunit, putative
EAH_00036260	6	0.47	0.28	0.56	0.5	0.3	0.67	0.45	0.27	0.55	0.49	0.56	1.22	0.46	0.29	0.6	0.49	0.55	1.24	0.44	hypothetical protein, conserved
EAH_00034790	1	0.47	NaN	NaN	NaN	0.8	1.7	0.47	na	na	na	na	na	na	na	na	na	na	na	na	DEAD/DEAH box helicase, putative
EAH_00033950	4	0.47	0.33	0.73	0.45	0.44	0.84	0.52	na	na	na	na	na	na	0.32	0.73	0.45	0.52	1.12	0.47	hypothetical protein, conserved
EAH_00030190	4	0.47	0.44	0.92	0.48	0.5	1.14	0.44	0.55	1.06	0.52	na	na	na	0.48	1.07	0.45	na	na	na	hypothetical protein, conserved
EAH_00022390	6	0.47	0.39	0.84	0.47	0.35	0.62	0.57	0.36	0.57	0.63	0.55	1.39	0.39	0.29	0.61	0.48	0.44	1.78	0.25	hypothetical protein, conserved
EAH_00020330	4	0.47	0.32	0.62	0.52	0.36	0.8	0.45	na	na	na	0.77	2	0.39	0.34	0.66	0.51	na	na	na	hypothetical protein, conserved
EAH_00012050	4	0.47	0.33	0.65	0.51	0.33	0.67	0.49	0.3	0.68	0.44	na	na	na	0.28	0.64	0.45	na	na	na	hypothetical protein, conserved
EAH_00011380	4	0.47	NaN	NaN	NaN	0.49	0.83	0.59	na	na	na	0.74	1.51	0.49	0.45	0.95	0.48	0.63	2.01	0.32	hypothetical protein, conserved
EAH_00010200	3	0.47	0.28	0.6	0.47	na	na	na	0.39	0.75	0.52	NaN	NaN	NaN	0.27	0.63	0.42	NaN	NaN	NaN	hypothetical protein, conserved
EAH_00003970	6	0.47	0.32	0.62	0.52	0.31	0.62	0.51	0.29	0.65	0.45	0.53	1.32	0.4	0.28	0.57	0.49	0.54	1.23	0.44	hypothetical protein, conserved
EAH_00067270	3	0.46	NaN	NaN	NaN	na	na	na	0.57	1.03	0.56	na	na	na	0.77	1.36	0.56	0.7	2.56	0.27	hypothetical protein, conserved
EAH_00060330	2	0.46	NaN	NaN	NaN	na	na	na	0.66	1.42	0.47	NaN	NaN	NaN	0.86	1.91	0.45	NaN	NaN	NaN	hypothetical protein, conserved
EAH_00057330	3	0.46	0.26	1.56	0.17	1.26	1.17	1.07	na	na	na	NaN	NaN	NaN	na	na	na	0.36	2.37	0.15	DNA-directed RNA polymerases I and III subunit RPAC1, putative
EAH_00053260	4	0.46	0.46	1.07	0.43	0.49	1.07	0.46	0.32	0.76	0.42	na	na	na	0.47	0.89	0.52	na	na	na	hypothetical protein, conserved
EAH_00036250	6	0.46	0.37	0.91	0.41	0.42	0.71	0.58	0.36	0.6	0.59	0.58	1.64	0.35	0.39	0.72	0.54	0.52	2.06	0.25	hypothetical protein, conserved
EAH_00032300	4	0.46	0.68	2.65	0.26	0.43	0.74	0.59	na	na	na	0.73	2.11	0.35	0.44	0.68	0.64	na	na	na	hypothetical protein, conserved
EAH_00028420	3	0.46	0.31	0.64	0.49	na	na	na	0.27	0.69	0.39	na	na	na	0.31	0.64	0.48	na	na	na	hypothetical protein, conserved
EAH_00027930	3	0.46	na	na	na	na	na	na	0.21	0.65	0.32	0.91	2.1	0.43	na	na	na	0.95	1.51	0.63	hypothetical protein, conserved
EAH_00024180	4	0.46	0.28	0.89	0.32	0.69	1.42	0.48	0.59	1.33	0.45	na	na	na	0.48	0.82	0.59	na	na	na	hypothetical protein, conserved
EAH_00023900	1	0.46	0.37	0.81	0.46	na	na	na	na	na	na	na	na	na	na	na	na	na	na	na	hypothetical protein, conserved
EAH_00023390	6	0.46	0.5	0.99	0.51	0.35	0.7	0.5	0.43	0.91	0.48	0.5	1.37	0.36	0.31	0.57	0.55	0.51	1.37	0.37	hypothetical protein, conserved
EAH_00019280	4	0.46	0.31	0.86	0.35	0.39	0.75	0.53	0.27	0.63	0.43	na	na	na	0.3	0.54	0.55	na	na	na	hypothetical protein, conserved
EAH_00019190	5	0.46	0.46	0.82	0.56	0.42	0.96	0.44	0.36	0.61	0.59	NaN	NaN	NaN	0.42	0.8	0.52	0.8	4.31	0.18	hypothetical protein, conserved
EAH_00018740	6	0.46	0.3	0.6	0.5	0.3	0.64	0.47	0.26	0.5	0.52	0.58	1.41	0.41	0.25	0.53	0.48	0.56	1.57	0.36	hypothetical protein, conserved
EAH_00013660	3	0.46	na	na	na	0.54	1.21	0.45	0.51	1.06	0.49	na	na	na	0.43	1	0.44	na	na	na	hypothetical protein, conserved
EAH_00007130	4	0.46	0.41	1	0.41	0.64	0.78	0.81	0.21	0.69	0.31	na	na	na	0.24	0.79	0.3	na	na	na	hypothetical protein, conserved
EAH_00000150	2	0.46	na	na	na	na	na	na	na	na	na	0.68	1.43	0.47	na	na	na	0.69	1.56	0.44	hypothetical protein, conserved
EAH_00059690	3	0.45	0.37	0.69	0.54	0.36	0.78	0.46	0.4	1.13	0.35	na	na	na	na	na	na	na	na	na	hypothetical protein, conserved
EAH_00055210	4	0.45	0.34	0.96	0.35	na	na	na	0.39	1.01	0.39	0.5	0.94	0.53	0.41	0.79	0.52	na	na	na	hypothetical protein, conserved
EAH_00054930	4	0.45	1.49	2.54	0.59	na	na	na	0.2	1.57	0.13	na	na	na	0.37	1.72	0.21	1.2	1.36	0.88	hypothetical protein, conserved
EAH_00046830	1	0.45	na	na	na	0.6	1.34	0.45	na	na	na	na	na	na	na	na	na	na	na	na	hypothetical protein, conserved
EAH_00041580	1	0.45	na	na	na	na	na	na	0.78	1.71	0.45	na	na	na	na	na	na	na	na	na	hypothetical protein, conserved
EAH_00033200	4	0.45	0.38	0.71	0.53	0.37	0.83	0.45	0.45	0.87	0.51	na	na	na	0.35	1.1	0.32	na	na	na	hypothetical protein, conserved
EAH_00031860	1	0.45	na	na	na	na	na	na	0.49	1.08	0.45	na	na	na	na	na	na	na	na	na	hypothetical protein, conserved
EAH_00025260	6	0.45	0.4	0.89	0.45	0.41	1.01	0.41	0.34	0.59	0.58	0.57	1.55	0.37	0.37	0.7	0.53	0.58	1.69	0.35	hypothetical protein, conserved
EAH_00023520	1	0.45	na	na	na	0.55	1.23	0.45	na	na	na	na	na	na	na	na	na	na	na	na	hypothetical protein, conserved
EAH_00022340	4	0.45	0.89	1.73	0.52	0.68	1.28	0.53	0.73	1.83	0.4	na	na	na	0.63	1.83	0.34	na	na	na	hypothetical protein, conserved
EAH_00021110	2	0.45	0.51	1	0.51	NaN	NaN	NaN	na	na	na	na	na	na	0.55	1.43	0.38	NaN	NaN	NaN	hypothetical protein, conserved
EAH_00019020	5	0.45	0.4	0.72	0.56	0.58	1.33	0.43	0.35	0.71	0.49	na	na	na	0.33	0.95	0.35	0.96	2.17	0.44	hypothetical protein, conserved
EAH_00013160	5	0.45	0.29	1.12	0.26	0.32	1.14	0.28	0.64	0.61	1.05	0.5	2.55	0.19	0.82	1.8	0.46	NaN	NaN	NaN	tRNA pseudouridine synthase (EC 5.4.99.-), related
EAH_00012090	6	0.45	0.28	0.56	0.51	0.39	0.67	0.59	0.25	0.49	0.5	0.6	1.98	0.3	0.26	0.59	0.44	0.59	1.67	0.35	hypothetical protein, conserved
EAH_00010000	2	0.45	na	na	na	na	na	na	0.72	1.21	0.6	na	na	na	na	na	na	0.32	1.03	0.31	hypothetical protein, conserved
EAH_00009550	5	0.45	0.32	0.73	0.44	0.47	0.65	0.73	na	na	na	0.47	1.47	0.32	0.3	0.74	0.4	0.58	1.57	0.37	hypothetical protein, conserved
EAH_00064030	5	0.44	0.35	0.83	0.42	0.47	1.02	0.46	0.3	0.6	0.51	0.77	1.32	0.58	na	na	na	0.31	1.31	0.24	dense granule protein GRA11, putative
EAH_00062380	6	0.44	0.38	0.88	0.44	0.37	0.88	0.42	0.42	0.82	0.51	0.6	1.47	0.41	0.36	0.67	0.54	0.54	1.58	0.34	hypothetical protein, conserved
EAH_00060010	2	0.44	0.73	1.53	0.48	na	na	na	0.68	1.69	0.4	NaN	NaN	NaN	na	na	na	na	na	na	hypothetical protein, conserved
EAH_00049410	1	0.44	0.68	1.52	0.44	na	na	na	na	na	na	na	na	na	na	na	na	na	na	na	hypothetical protein, conserved
EAH_00042760	1	0.44	na	na	na	na	na	na	0.34	0.77	0.44	na	na	na	na	na	na	na	na	na	hypothetical protein, conserved
EAH_00033250	4	0.44	0.31	0.7	0.45	0.48	0.82	0.58	0.26	0.86	0.3	na	na	na	0.3	0.74	0.41	na	na	na	hypothetical protein, conserved
EAH_00032740	6	0.44	0.23	0.49	0.47	0.31	0.54	0.59	0.21	0.58	0.36	0.53	1.17	0.45	0.24	0.59	0.41	0.48	1.3	0.37	hypothetical protein, conserved
EAH_00029520	2	0.44	0.9	1.83	0.49	0.54	1.4	0.39	na	na	na	na	na	na	na	na	na	na	na	na	hypothetical protein, conserved
EAH_00028410	3	0.44	na	na	na	na	na	na	na	na	na	0.68	1.58	0.43	0.29	0.68	0.44	0.63	1.38	0.45	hypothetical protein, conserved
EAH_00006670	1	0.44	na	na	na	na	na	na	0.37	0.83	0.44	na	na	na	na	na	na	na	na	na	hypothetical protein, conserved
EAH_00002900	4	0.44	0.33	0.65	0.5	0.3	0.66	0.45	0.33	0.8	0.41	na	na	na	0.26	0.64	0.41	na	na	na	hypothetical protein, conserved
EAH_00002860	6	0.44	0.31	0.65	0.47	0.31	0.7	0.45	0.41	0.8	0.51	0.56	1.27	0.44	0.28	0.73	0.38	0.56	1.4	0.4	hypothetical protein, conserved
EAH_00063390	5	0.43	0.71	1.98	0.36	0.62	1.07	0.58	0.7	1.46	0.48	0.9	3.12	0.29	0.59	1.32	0.45	NaN	NaN	NaN	esf2 family
EAH_00061890	2	0.43	0.95	2.06	0.46	na	na	na	na	na	na	0.89	2.21	0.4	na	na	na	na	na	na	hypothetical protein, conserved
EAH_00059530	5	0.43	0.73	1.28	0.57	0.59	1.07	0.55	na	na	na	0.51	1.78	0.29	0.21	0.74	0.28	0.64	1.45	0.44	yip1 domain-containing protein, putative
EAH_00053950	5	0.43	0.51	1.36	0.38	0.39	0.92	0.42	0.26	0.91	0.29	0.49	2.1	0.23	na	na	na	0.99	1.19	0.83	hypothetical protein, conserved
EAH_00047610	6	0.43	0.61	1.66	0.37	0.56	1.58	0.35	0.59	1.19	0.49	0.79	1.72	0.46	0.53	0.97	0.54	0.82	2.16	0.38	hypothetical protein, conserved
EAH_00039890	4	0.43	na	na	na	0.32	0.68	0.48	na	na	na	0.51	1.34	0.38	0.28	0.6	0.46	0.57	1.35	0.42	hypothetical protein, conserved
EAH_00034670	5	0.43	0.45	0.96	0.47	0.33	0.85	0.38	0.41	0.91	0.46	0.72	1.86	0.39	0.41	0.89	0.46	na	na	na	hypothetical protein, conserved
EAH_00034160	4	0.43	0.44	1.02	0.43	0.43	1.05	0.4	0.33	0.63	0.53	na	na	na	0.39	1.09	0.36	na	na	na	hypothetical protein, conserved
EAH_00032140	5	0.43	0.39	2.38	0.17	na	na	na	0.48	1.19	0.4	0.58	2.11	0.27	0.5	1.12	0.44	1.11	1.3	0.85	hypothetical protein, conserved
EAH_00027410	5	0.43	0.52	1.3	0.4	0.39	0.97	0.4	0.56	1.25	0.44	1.21	1.85	0.65	0.34	1.31	0.26	NaN	NaN	NaN	hypothetical protein, conserved
EAH_00025440	2	0.43	na	na	na	0.31	1.02	0.3	na	na	na	0.66	1.18	0.56	na	na	na	na	na	na	hypothetical protein, conserved
EAH_00021490	2	0.43	NaN	NaN	NaN	0.49	1.14	0.43	na	na	na	na	na	na	0.53	1.24	0.43	na	na	na	26S proteasome non-ATPase regulatory subunit, putative
EAH_00013050	1	0.43	na	na	na	0.46	1.08	0.43	na	na	na	na	na	na	na	na	na	na	na	na	hypothetical protein, conserved
EAH_00009440	6	0.43	0.25	0.57	0.44	0.28	0.52	0.53	0.27	0.56	0.48	0.53	1.58	0.33	0.25	0.58	0.43	0.49	1.39	0.35	hypothetical protein, conserved
EAH_00008810	6	0.43	0.36	0.62	0.58	0.28	0.76	0.37	0.3	0.56	0.54	0.48	2.01	0.24	0.29	0.52	0.56	0.48	1.78	0.27	hypothetical protein, conserved
EAH_00006500	5	0.43	na	na	na	0.33	1.06	0.31	0.21	0.45	0.47	0.66	1.73	0.38	0.36	0.6	0.6	0.65	1.81	0.36	hypothetical protein, conserved
EAH_00004010	4	0.43	0.24	0.69	0.35	0.31	0.73	0.43	0.34	0.62	0.54	na	na	na	0.26	0.65	0.4	na	na	na	hypothetical protein, conserved
EAH_00001430	3	0.43	na	na	na	1.01	1.94	0.52	na	na	na	1.29	2.31	0.56	0.54	2.52	0.22	na	na	na	hypothetical protein, conserved
EAH_00059410	5	0.42	0.76	1.23	0.61	0.44	1.38	0.32	0.37	1.02	0.37	0.45	1.45	0.31	0.46	0.92	0.5	na	na	na	hypothetical protein, conserved
EAH_00052820	2	0.42	na	na	na	NaN	NaN	NaN	NaN	NaN	NaN	1.21	1.55	0.78	na	na	na	0.15	2.52	0.06	cardiolipin synthase, putative
EAH_00046990	4	0.42	0.7	2.04	0.34	0.68	1.37	0.5	0.62	1.79	0.35	na	na	na	0.63	1.31	0.48	na	na	na	hypothetical protein, conserved
EAH_00043320	4	0.42	0.19	0.96	0.2	0.38	1.22	0.31	0.42	0.92	0.45	0.73	1.05	0.7	na	na	na	na	na	na	hypothetical protein, conserved
EAH_00038050	6	0.42	0.36	0.84	0.43	0.38	0.93	0.41	0.36	0.98	0.37	0.56	1.45	0.38	0.46	0.92	0.5	0.5	1.16	0.43	hypothetical protein, conserved
EAH_00035660	5	0.42	0.25	0.5	0.49	0.23	0.55	0.43	na	na	na	0.5	1.27	0.39	0.25	0.51	0.49	0.48	1.63	0.3	hypothetical protein, conserved
EAH_00030350	1	0.42	na	na	na	0.35	0.82	0.42	na	na	na	na	na	na	na	na	na	na	na	na	hypothetical protein, conserved
EAH_00025300	2	0.42	1.28	1.62	0.79	0.11	2.84	0.04	na	na	na	NaN	NaN	NaN	na	na	na	NaN	NaN	NaN	eukaryotic translation initiation factor 3 subunit 7, putative
EAH_00023290	2	0.42	na	na	na	na	na	na	na	na	na	0.57	1.39	0.41	na	na	na	0.52	1.18	0.44	hypothetical protein, conserved
EAH_00017670	1	0.42	na	na	na	na	na	na	na	na	na	0.99	2.38	0.42	na	na	na	NaN	NaN	NaN	phosphate carrier protein, putative
EAH_00016760	5	0.42	0.76	1.94	0.39	0.69	1.8	0.38	0.51	1.57	0.33	1.02	1.93	0.53	na	na	na	0.92	1.86	0.49	hypothetical protein, conserved
EAH_00015100	6	0.42	0.22	0.63	0.36	0.29	0.54	0.55	0.27	0.57	0.47	0.51	1.34	0.38	0.27	0.62	0.43	0.53	1.57	0.34	hypothetical protein, conserved
EAH_00012520	6	0.42	0.51	2.02	0.25	0.41	0.9	0.45	0.56	1	0.56	0.6	1.5	0.4	0.48	1.03	0.46	0.63	1.53	0.41	hypothetical protein, conserved
EAH_00012390	5	0.42	0.32	0.98	0.33	0.57	1.13	0.5	0.34	0.87	0.4	0.51	1.27	0.4	na	na	na	0.55	1.13	0.48	hypothetical protein, conserved
EAH_00011130	3	0.42	0.43	0.81	0.53	na	na	na	0.34	0.81	0.42	na	na	na	0.24	0.78	0.3	na	na	na	hypothetical protein, conserved
EAH_00007800	6	0.42	0.29	0.61	0.47	0.31	0.75	0.41	0.27	0.62	0.44	0.47	1.38	0.34	0.3	0.57	0.53	0.48	1.47	0.33	hypothetical protein, conserved
EAH_00005420	6	0.42	0.3	0.71	0.43	0.38	0.82	0.46	0.27	0.64	0.42	0.58	1.61	0.36	0.28	0.73	0.39	0.6	1.35	0.44	hypothetical protein, conserved
EAH_00005350	4	0.42	0.49	1.39	0.35	0.43	0.85	0.51	0.46	1.26	0.36	na	na	na	0.36	0.79	0.46	na	na	na	hypothetical protein, conserved
EAH_00005170	5	0.42	0.37	0.89	0.42	na	na	na	0.57	0.77	0.74	0.3	1.49	0.2	0.53	1.14	0.47	0.28	1.11	0.25	hypothetical protein, conserved
EAH_00000100	6	0.42	0.32	0.68	0.47	0.28	0.75	0.37	0.26	0.49	0.52	0.54	1.45	0.37	0.29	0.63	0.46	0.53	1.5	0.35	hypothetical protein, conserved
EAH_00000080	6	0.42	0.38	0.85	0.45	0.45	0.89	0.5	0.33	0.74	0.44	0.65	1.86	0.35	0.3	0.8	0.38	0.69	1.77	0.39	hypothetical protein, conserved
EAH_00064280	1	0.41	0.56	1.35	0.41	na	na	na	na	na	na	na	na	na	na	na	na	na	na	na	hypothetical protein, conserved
EAH_00058770	3	0.41	0.23	0.76	0.31	0.24	0.84	0.28	na	na	na	NaN	NaN	NaN	0.27	0.42	0.63	NaN	NaN	NaN	hypothetical protein, conserved
EAH_00055520	4	0.41	0.61	1.26	0.48	0.54	1.75	0.31	na	na	na	NaN	NaN	NaN	0.5	0.76	0.66	0.62	3.23	0.19	hypothetical protein, conserved
EAH_00053980	1	0.41	na	na	na	na	na	na	0.39	0.96	0.41	na	na	na	na	na	na	na	na	na	hypothetical protein, conserved
EAH_00041290	6	0.41	0.28	0.57	0.49	0.27	0.73	0.37	0.25	0.55	0.46	0.46	1.52	0.3	0.28	0.53	0.53	0.43	1.46	0.29	histidyl-tRNA synthetase, putative
EAH_00035170	3	0.41	0.51	0.87	0.59	0.57	2.49	0.23	0.46	1.1	0.42	na	na	na	na	na	na	na	na	na	hypothetical protein, conserved
EAH_00033240	1	0.41	0.41	0.99	0.41	na	na	na	na	na	na	NaN	NaN	NaN	na	na	na	na	na	na	hypothetical protein, conserved
EAH_00032670	4	0.41	0.36	0.99	0.36	na	na	na	0.39	0.9	0.43	0.66	1.36	0.49	na	na	na	0.74	1.97	0.37	hypothetical protein, conserved
EAH_00030760	4	0.41	0.33	0.62	0.53	0.3	1.15	0.26	0.33	0.69	0.47	na	na	na	0.27	0.73	0.37	na	na	na	hypothetical protein, conserved
EAH_00029910	4	0.41	0.42	0.99	0.42	0.54	1.6	0.34	na	na	na	0.72	1.57	0.46	na	na	na	0.76	1.85	0.41	hypothetical protein, conserved
EAH_00029310	3	0.41	na	na	na	0.25	0.51	0.49	0.23	0.47	0.49	na	na	na	na	na	na	0.42	1.64	0.26	hypothetical protein, conserved
EAH_00028400	2	0.41	0.25	0.59	0.42	na	na	na	na	na	na	0.49	1.22	0.4	na	na	na	na	na	na	hypothetical protein, conserved
EAH_00027170	1	0.41	na	na	na	0.35	0.84	0.41	na	na	na	na	na	na	na	na	na	na	na	na	hypothetical protein, conserved
EAH_00023020	4	0.41	na	na	na	0.55	1.23	0.44	na	na	na	0.82	1.98	0.41	0.51	1.01	0.5	0.76	2.63	0.29	hypothetical protein, conserved
EAH_00020760	4	0.41	0.54	1.5	0.36	na	na	na	na	na	na	0.51	1.03	0.5	0.36	0.68	0.53	0.47	1.71	0.27	zinc finger, ZZ type domain-containing protein, putative
EAH_00020740	4	0.41	na	na	na	0.34	0.82	0.41	0.38	0.77	0.5	0.33	0.91	0.36	0.48	1.26	0.38	na	na	na	hypothetical protein, conserved
EAH_00020210	2	0.41	0.85	1.63	0.52	na	na	na	na	na	na	na	na	na	0.64	2.18	0.29	na	na	na	hypothetical protein, conserved
EAH_00018820	2	0.41	na	na	na	0.45	0.91	0.49	na	na	na	na	na	na	0.51	1.57	0.32	na	na	na	hypothetical protein, conserved
EAH_00017610	4	0.41	0.74	1.67	0.44	0.69	2.31	0.3	0.45	1.07	0.42	na	na	na	0.5	1.09	0.46	na	na	na	hypothetical protein, conserved
EAH_00017580	4	0.41	na	na	na	0.29	0.73	0.4	na	na	na	0.43	1.02	0.42	0.34	0.66	0.51	0.42	1.42	0.3	hypothetical protein, conserved
EAH_00017540	5	0.41	0.65	1.22	0.54	0.45	0.9	0.5	0.74	1.51	0.49	0.56	2.53	0.22	na	na	na	0.54	1.91	0.28	hypothetical protein, conserved
EAH_00015000	3	0.41	0.38	0.85	0.45	0.31	0.7	0.45	na	na	na	na	na	na	0.24	0.75	0.32	na	na	na	hypothetical protein, conserved
EAH_00013380	4	0.41	0.41	1.08	0.38	NaN	NaN	NaN	0.49	1.1	0.45	0.84	4.27	0.2	na	na	na	1.07	1.74	0.61	hypothetical protein, conserved
EAH_00013370	1	0.41	na	na	na	0.77	1.89	0.41	na	na	na	na	na	na	na	na	na	na	na	na	hypothetical protein, conserved
EAH_00012960	6	0.41	0.4	0.63	0.64	0.29	0.63	0.46	0.3	0.81	0.37	0.45	1.46	0.31	0.24	0.75	0.33	0.53	1.65	0.32	hypothetical protein, conserved
EAH_00012100	6	0.41	0.56	1.26	0.44	0.59	1.3	0.45	0.55	1.06	0.52	0.87	4.48	0.19	0.6	1.15	0.53	0.9	2.69	0.33	hypothetical protein, conserved
EAH_00011630	4	0.41	0.29	0.88	0.33	0.33	0.73	0.46	na	na	na	0.59	1.45	0.41	na	na	na	0.56	1.26	0.45	troponin C, putative
EAH_00009530	2	0.41	NaN	NaN	NaN	na	na	na	na	na	na	NaN	NaN	NaN	0.22	1.1	0.2	1.17	1.86	0.63	hypothetical protein, conserved
EAH_00005030	5	0.41	na	na	na	0.26	0.91	0.29	0.51	0.89	0.57	0.57	1.23	0.46	0.42	1.35	0.31	0.51	1.21	0.42	hypothetical protein, conserved
EAH_00003760	3	0.41	0.3	0.65	0.47	na	na	na	0.24	0.61	0.4	NaN	NaN	NaN	0.25	0.68	0.37	NaN	NaN	NaN	hypothetical protein, conserved
EAH_00067880	4	0.4	0.33	0.97	0.34	0.32	0.82	0.39	0.29	0.58	0.49	NaN	NaN	NaN	0.42	1.08	0.39	NaN	NaN	NaN	hypothetical protein, conserved
EAH_00066230	4	0.4	0.95	1.43	0.66	0.36	1.5	0.24	0.37	1.22	0.3	na	na	na	na	na	na	0.48	1.26	0.38	hypothetical protein, conserved
EAH_00064590	2	0.4	NaN	NaN	NaN	na	na	na	1.32	1.95	0.68	0.17	1.44	0.12	na	na	na	na	na	na	hypothetical protein, conserved
EAH_00059550	4	0.4	0.44	1.94	0.23	0.62	0.99	0.63	1.01	1.98	0.51	0.41	1.65	0.25	na	na	na	na	na	na	WD-40 repeat-containing protein, putative
EAH_00058790	1	0.4	na	na	na	na	na	na	0.29	0.73	0.4	na	na	na	na	na	na	na	na	na	hypothetical protein, conserved
EAH_00049040	2	0.4	0.15	0.75	0.19	0.7	1.18	0.6	na	na	na	na	na	na	na	na	na	na	na	na	seryl-tRNA synthetase, putative
EAH_00048710	3	0.4	0.33	0.86	0.38	na	na	na	na	na	na	0.49	1.19	0.41	na	na	na	0.42	1.07	0.39	hypothetical protein, conserved
EAH_00047770	2	0.4	na	na	na	0.24	0.9	0.27	na	na	na	na	na	na	na	na	na	0.96	1.82	0.53	LCCL-related protein CCp5B, related
EAH_00042880	5	0.4	0.32	1	0.32	0.33	0.77	0.42	0.35	0.93	0.38	0.54	1.45	0.37	0.45	0.9	0.5	na	na	na	hypothetical protein, conserved
EAH_00036410	4	0.4	na	na	na	0.46	1.09	0.42	0.36	0.93	0.39	0.5	2.03	0.24	0.53	0.96	0.56	NaN	NaN	NaN	hypothetical protein, conserved
EAH_00035800	2	0.4	na	na	na	0.56	1.02	0.55	na	na	na	NaN	NaN	NaN	0.47	1.93	0.25	na	na	na	Chromosome III, complete sequence, related
EAH_00035610	1	0.4	0.38	0.94	0.4	na	na	na	na	na	na	na	na	na	na	na	na	na	na	na	hypothetical protein, conserved
EAH_00034260	6	0.4	0.27	0.59	0.46	0.26	0.68	0.39	0.27	0.58	0.46	0.45	1.49	0.3	0.24	0.53	0.46	0.44	1.31	0.34	hypothetical protein, conserved
EAH_00034040	5	0.4	0.63	1.68	0.38	0.54	1.27	0.42	na	na	na	0.74	1.68	0.44	0.58	1.32	0.44	0.73	2.28	0.32	esf1 family
EAH_00031810	2	0.4	na	na	na	na	na	na	na	na	na	0.45	1.09	0.41	na	na	na	0.53	1.36	0.39	meiotic recombination protein SPO11, putative
EAH_00031290	2	0.4	na	na	na	0.32	0.83	0.39	na	na	na	na	na	na	0.26	0.62	0.42	na	na	na	hypothetical protein, conserved
EAH_00031230	1	0.4	NaN	NaN	NaN	NaN	NaN	NaN	0.55	1.39	0.4	NaN	NaN	NaN	na	na	na	NaN	NaN	NaN	hypothetical protein, conserved
EAH_00024840	1	0.4	na	na	na	na	na	na	0.57	1.45	0.4	na	na	na	na	na	na	na	na	na	hypothetical protein, conserved
EAH_00016640	4	0.4	0.55	1.11	0.5	0.39	1.03	0.38	0.36	1.06	0.35	NaN	NaN	NaN	0.39	1.04	0.37	NaN	NaN	NaN	hypothetical protein, conserved
EAH_00015480	2	0.4	0.12	1.15	0.1	na	na	na	NaN	NaN	NaN	na	na	na	na	na	na	0.72	1.05	0.69	transducin beta-like protein 1 (TgTBL1), putative
EAH_00013430	6	0.4	0.29	0.95	0.31	0.22	1.3	0.17	0.46	0.56	0.83	0.3	0.92	0.33	0.33	1.39	0.24	0.66	1.27	0.52	hypothetical protein, conserved
EAH_00009940	5	0.4	0.71	2.33	0.3	0.52	0.85	0.62	na	na	na	0.73	2.33	0.31	0.57	1.16	0.49	0.72	2.46	0.29	esf2 family
EAH_00006880	4	0.4	0.53	0.98	0.54	0.93	1.78	0.52	0.41	1.04	0.4	na	na	na	na	na	na	0.41	2.97	0.14	protein phosphatase 2C, putative
EAH_00001250	6	0.4	0.32	0.72	0.44	0.33	0.82	0.4	0.33	0.76	0.43	0.58	2.16	0.27	0.33	0.62	0.53	0.57	1.87	0.31	hypothetical protein, conserved
EAH_00001000	4	0.4	0.41	2.87	0.14	na	na	na	0.44	0.64	0.69	0.6	1.68	0.36	0.48	1.17	0.41	na	na	na	hypothetical protein, conserved
EAH_00000510	5	0.4	0.3	0.68	0.44	0.26	0.67	0.39	0.29	0.59	0.49	na	na	na	0.23	0.55	0.41	0.43	1.56	0.27	hypothetical protein, conserved
EAH_00065770	4	0.39	0.5	1.2	0.41	0.34	1.11	0.31	0.47	0.9	0.52	na	na	na	0.31	0.97	0.32	na	na	na	Endonuclease/exonuclease/phosphatase domain-containing protein (EC 3.1.3.56), related
EAH_00065740	3	0.39	0.16	0.77	0.21	na	na	na	na	na	na	0.29	1.45	0.2	na	na	na	1.08	1.4	0.77	hypothetical protein, conserved
EAH_00064950	1	0.39	na	na	na	na	na	na	0.37	0.94	0.39	na	na	na	na	na	na	na	na	na	hypothetical protein, conserved
EAH_00063180	3	0.39	0.27	0.78	0.35	0.27	0.82	0.32	na	na	na	na	na	na	0.39	0.8	0.48	na	na	na	hypothetical protein, conserved
EAH_00062220	6	0.39	0.42	1.6	0.27	0.47	1.3	0.36	0.73	1.88	0.39	0.55	1.03	0.53	0.41	1.07	0.39	0.69	1.77	0.39	hypothetical protein, conserved
EAH_00058180	4	0.39	na	na	na	0.39	1.19	0.33	0.94	1.98	0.47	0.72	1.62	0.44	na	na	na	0.34	1.08	0.31	hypothetical protein, conserved
EAH_00046730	2	0.39	0.21	0.61	0.34	na	na	na	na	na	na	na	na	na	0.38	0.88	0.44	na	na	na	hypothetical protein, conserved
EAH_00046630	6	0.39	0.33	0.64	0.52	0.3	0.61	0.5	0.22	0.47	0.48	0.25	1.11	0.23	0.2	0.53	0.37	0.27	1.08	0.25	hypothetical protein, conserved
EAH_00045320	5	0.39	0.4	1.25	0.32	0.46	1.03	0.45	0.56	1.35	0.41	0.47	1.39	0.34	0.53	1.23	0.43	na	na	na	hypothetical protein, conserved
EAH_00044450	3	0.39	0.66	1.5	0.44	na	na	na	na	na	na	na	na	na	0.46	1.3	0.36	0.71	1.86	0.38	GF17870, related
EAH_00044160	6	0.39	0.32	0.95	0.34	0.45	1.14	0.39	0.32	1.05	0.3	0.59	1.23	0.48	0.4	2.13	0.19	0.72	1.1	0.65	hypothetical protein, conserved
EAH_00044130	1	0.39	na	na	na	na	na	na	na	na	na	na	na	na	0.34	0.85	0.39	na	na	na	hypothetical protein, conserved
EAH_00043080	5	0.39	0.56	1.32	0.42	na	na	na	0.44	0.96	0.46	0.54	2.1	0.26	0.59	1.16	0.51	0.57	1.77	0.32	hypothetical protein, conserved
EAH_00041450	2	0.39	0.43	0.99	0.44	na	na	na	na	na	na	na	na	na	0.29	0.84	0.34	na	na	na	hypothetical protein, conserved
EAH_00041410	4	0.39	0.39	0.9	0.43	0.39	1.5	0.26	na	na	na	na	na	na	0.46	1.07	0.43	0.59	1.4	0.42	hypothetical protein, conserved
EAH_00039830	6	0.39	0.29	0.7	0.42	0.35	0.91	0.39	0.28	0.57	0.48	0.51	1.61	0.32	0.27	0.67	0.41	0.53	1.56	0.34	hypothetical protein, conserved
EAH_00035870	3	0.39	0.37	1.09	0.34	na	na	na	0.44	0.86	0.51	na	na	na	0.44	1.32	0.33	na	na	na	hypothetical protein, conserved
EAH_00035260	4	0.39	na	na	na	0.61	1.89	0.32	0.69	1.44	0.48	0.66	2.77	0.24	0.48	0.92	0.51	na	na	na	hypothetical protein, conserved
EAH_00034780	1	0.39	na	na	na	na	na	na	0.59	1.5	0.39	na	na	na	na	na	na	na	na	na	phosphatidate cytidylyltransferase, putative
EAH_00029840	1	0.39	0.55	1.4	0.39	na	na	na	na	na	na	na	na	na	na	na	na	na	na	na	hypothetical protein, conserved
EAH_00028370	5	0.39	na	na	na	0.37	0.87	0.42	0.22	0.91	0.24	0.64	1.62	0.39	0.31	0.78	0.4	0.63	1.34	0.47	kazal-type serine protease inhibitor domain-containing protein, putative
EAH_00028350	4	0.39	0.62	1.35	0.46	0.43	1.55	0.28	na	na	na	NaN	NaN	NaN	0.38	0.58	0.66	0.67	4.11	0.16	hypothetical protein, conserved
EAH_00027970	6	0.39	0.24	0.4	0.61	0.31	0.86	0.36	0.17	0.68	0.25	0.44	1.42	0.31	0.23	0.46	0.5	0.44	1.38	0.32	hypothetical protein, conserved
EAH_00024920	6	0.39	0.47	0.98	0.48	0.39	0.96	0.41	0.29	0.71	0.41	0.41	1.19	0.35	0.26	0.81	0.32	0.41	1.17	0.35	hypothetical protein, conserved
EAH_00024480	6	0.39	0.28	0.61	0.47	0.33	0.71	0.47	0.29	0.65	0.45	0.54	1.51	0.35	0.15	0.65	0.23	0.53	1.45	0.36	hypothetical protein, conserved
EAH_00022500	5	0.39	0.3	0.65	0.47	0.43	0.91	0.47	na	na	na	0.57	2.99	0.19	0.32	0.59	0.54	0.61	2.21	0.27	zinc finger (CHY type) protein, putative
EAH_00022430	4	0.39	0.44	1.06	0.42	na	na	na	na	na	na	0.43	1.18	0.36	0.22	0.54	0.41	0.48	1.37	0.35	hypothetical protein, conserved
EAH_00021820	2	0.39	na	na	na	0.43	1.01	0.43	0.42	1.19	0.35	na	na	na	na	na	na	na	na	na	hypothetical protein, conserved
EAH_00021250	3	0.39	0.25	0.62	0.4	0.31	0.9	0.34	0.23	0.57	0.41	na	na	na	na	na	na	na	na	na	hypothetical protein, conserved
EAH_00019940	5	0.39	0.51	0.96	0.53	0.5	1.21	0.41	na	na	na	0.63	2.36	0.27	0.47	0.99	0.47	0.55	2.21	0.25	hypothetical protein, conserved
EAH_00017470	3	0.39	0.35	0.89	0.4	0.36	0.95	0.38	0.25	0.67	0.37	na	na	na	na	na	na	na	na	na	hypothetical protein, conserved
EAH_00016000	6	0.39	0.25	0.61	0.41	0.23	0.55	0.41	0.2	0.49	0.41	0.42	1.25	0.34	0.22	0.48	0.47	0.39	1.37	0.28	hypothetical protein, conserved
EAH_00012320	5	0.39	0.24	0.58	0.42	0.27	0.63	0.43	na	na	na	0.45	1.37	0.33	0.24	0.56	0.43	0.45	1.37	0.33	hypothetical protein, conserved
EAH_00011650	4	0.39	0.46	0.91	0.51	0.37	1.06	0.35	na	na	na	0.42	1.95	0.22	0.42	0.86	0.48	na	na	na	sag
EAH_00010760	5	0.39	0.62	1.4	0.45	na	na	na	0.64	1.66	0.38	0.78	3.19	0.25	0.57	1.12	0.51	0.72	1.92	0.37	hypothetical protein, conserved
EAH_00010580	1	0.39	na	na	na	na	na	na	0.61	1.55	0.39	na	na	na	na	na	na	na	na	na	hypothetical protein, conserved
EAH_00009300	3	0.39	na	na	na	na	na	na	na	na	na	0.44	1.35	0.32	0.6	1.14	0.53	0.49	1.47	0.33	hypothetical protein, conserved
EAH_00008900	5	0.39	na	na	na	0.42	0.95	0.44	0.34	0.72	0.48	0.48	2.21	0.21	0.47	0.7	0.67	0.45	2.85	0.16	hypothetical protein, conserved
EAH_00008670	1	0.39	na	na	na	0.26	0.67	0.39	na	na	na	NaN	NaN	NaN	na	na	na	NaN	NaN	NaN	hypothetical protein, conserved
EAH_00003620	5	0.39	0.31	0.83	0.37	0.32	0.65	0.49	na	na	na	0.56	1.46	0.38	0.27	0.76	0.36	0.56	1.53	0.37	hypothetical protein, conserved
EAH_00003390	1	0.39	na	na	na	na	na	na	0.4	1.01	0.39	na	na	na	na	na	na	na	na	na	hypothetical protein, conserved
EAH_00001490	6	0.39	0.55	0.97	0.56	0.38	1.08	0.35	0.44	0.81	0.55	0.49	1.7	0.29	0.41	1.29	0.32	0.45	1.62	0.28	hypothetical protein, conserved
EAH_00000660	4	0.39	0.25	0.67	0.38	0.5	1.24	0.4	0.23	0.62	0.38	na	na	na	0.23	0.55	0.42	na	na	na	hypothetical protein, conserved
EAH_00061110	2	0.38	na	na	na	0.54	1.82	0.3	na	na	na	na	na	na	0.43	0.91	0.47	na	na	na	hypothetical protein, conserved
EAH_00060520	4	0.38	0.47	1.9	0.25	na	na	na	0.5	0.87	0.57	0.38	1.76	0.22	0.54	1.13	0.48	na	na	na	hypothetical protein, conserved
EAH_00060390	1	0.38	0.88	2.3	0.38	na	na	na	na	na	na	na	na	na	na	na	na	na	na	na	phosphoenolpyruvate carboxykinase, putative
EAH_00060100	3	0.38	0.26	3.78	0.07	0.92	1.31	0.7	0.94	2.48	0.38	NaN	NaN	NaN	NaN	NaN	NaN	NaN	NaN	NaN	DNA polymerase alpha catalytic subunit, putative
EAH_00060080	4	0.38	0.58	2.7	0.21	0.27	2.5	0.11	0.84	1.06	0.79	NaN	NaN	NaN	0.59	1.37	0.43	NaN	NaN	NaN	dpy-30 motif-containing protein, putative
EAH_00053510	6	0.38	0.37	0.95	0.38	0.33	0.76	0.44	0.28	0.9	0.32	0.41	2.14	0.19	0.74	0.99	0.75	0.32	1.8	0.18	hypothetical protein, conserved
EAH_00052480	6	0.38	0.37	0.97	0.38	0.34	0.95	0.36	0.34	0.78	0.43	0.53	1.44	0.37	0.36	0.92	0.4	0.52	1.61	0.32	GRA9 protein, putative
EAH_00052470	2	0.38	na	na	na	na	na	na	na	na	na	0.7	1.96	0.36	na	na	na	0.72	1.8	0.4	esf1 family
EAH_00051190	1	0.38	0.77	2.02	0.38	NaN	NaN	NaN	NaN	NaN	NaN	NaN	NaN	NaN	NaN	NaN	NaN	NaN	NaN	NaN	RNA recognition motif-containing protein, putative
EAH_00050190	2	0.38	na	na	na	0.48	1.7	0.28	0.62	1.3	0.48	na	na	na	na	na	na	na	na	na	hypothetical protein, conserved
EAH_00050040	6	0.38	0.26	0.73	0.36	0.32	0.73	0.44	0.22	0.56	0.4	0.54	1.62	0.34	0.3	0.64	0.47	0.53	1.75	0.3	hypothetical protein, conserved
EAH_00048990	2	0.38	na	na	na	na	na	na	0.25	0.82	0.3	0.74	1.64	0.45	na	na	na	na	na	na	sugar permease, putative
EAH_00046000	6	0.38	0.55	1.45	0.38	0.57	1.48	0.38	0.41	0.99	0.41	0.45	1.02	0.44	0.4	1.35	0.3	0.44	1.24	0.36	hypothetical protein, conserved
EAH_00045790	6	0.38	0.43	1.16	0.37	0.36	0.8	0.45	0.25	0.91	0.28	0.36	0.94	0.38	0.31	0.78	0.4	0.37	1	0.37	hypothetical protein, conserved
EAH_00044350	4	0.38	0.35	1.2	0.3	0.39	1.72	0.23	0.51	1.39	0.37	NaN	NaN	NaN	0.57	0.91	0.62	na	na	na	hypothetical protein, conserved
EAH_00043700	5	0.38	0.37	1.73	0.21	0.52	1.16	0.45	0.65	1.43	0.45	NaN	NaN	NaN	0.35	1.1	0.32	0.83	1.83	0.45	hypothetical protein, conserved
EAH_00042900	6	0.38	0.25	0.58	0.43	0.27	0.61	0.45	0.22	0.55	0.41	0.47	1.45	0.32	0.21	0.57	0.37	0.49	1.52	0.32	MFS transporter, related
EAH_00042270	3	0.38	0.32	1.13	0.29	0.41	1.32	0.31	na	na	na	na	na	na	0.78	1.41	0.55	na	na	na	hypothetical protein, conserved
EAH_00038300	4	0.38	0.39	1.12	0.35	0.29	1.08	0.26	0.44	0.91	0.49	NaN	NaN	NaN	0.39	0.96	0.4	NaN	NaN	NaN	hypothetical protein, conserved
EAH_00038140	1	0.38	1	2.64	0.38	na	na	na	na	na	na	na	na	na	na	na	na	na	na	na	hypothetical protein, conserved
EAH_00031340	3	0.38	na	na	na	0.23	0.67	0.34	na	na	na	na	na	na	0.23	0.42	0.54	0.4	1.51	0.27	hypothetical protein, conserved
EAH_00030440	3	0.38	0.43	1.15	0.37	na	na	na	0.47	1.12	0.42	na	na	na	0.49	1.38	0.36	na	na	na	hypothetical protein, conserved
EAH_00029490	2	0.38	na	na	na	0.63	1.22	0.52	na	na	na	NaN	NaN	NaN	0.4	1.67	0.24	NaN	NaN	NaN	hypothetical protein, conserved
EAH_00024220	5	0.38	0.37	0.97	0.38	0.45	1.01	0.44	0.38	0.84	0.45	na	na	na	0.35	0.79	0.44	0.61	3.67	0.17	hypothetical protein, conserved
EAH_00023950	3	0.38	0.43	1.04	0.41	na	na	na	0.39	1.14	0.34	na	na	na	0.5	1.28	0.39	na	na	na	hypothetical protein, conserved
EAH_00020890	3	0.38	0.52	1.26	0.41	0.39	0.95	0.4	na	na	na	na	na	na	0.31	0.96	0.32	na	na	na	hypothetical protein, conserved
EAH_00017860	1	0.38	NaN	NaN	NaN	na	na	na	0.34	0.92	0.38	NaN	NaN	NaN	na	na	na	na	na	na	radial spokehead-L protein, putative
EAH_00016010	6	0.38	0.24	0.71	0.34	0.28	0.8	0.34	0.25	0.6	0.41	0.45	1.33	0.34	0.25	0.49	0.51	0.43	1.31	0.33	hypothetical protein, conserved
EAH_00012850	6	0.38	0.29	0.62	0.47	0.31	0.6	0.51	0.31	0.69	0.45	0.6	2.86	0.21	0.3	0.58	0.52	0.58	4.18	0.14	hypothetical protein, conserved
EAH_00011640	3	0.38	0.42	1.13	0.37	0.34	1.18	0.29	0.41	0.86	0.47	na	na	na	na	na	na	na	na	na	sag
EAH_00011220	3	0.38	na	na	na	0.44	1.08	0.41	0.34	0.98	0.35	na	na	na	0.38	1	0.38	na	na	na	hypothetical protein, conserved
EAH_00005460	5	0.38	0.41	0.83	0.49	0.37	1.03	0.36	na	na	na	0.42	1.51	0.28	0.27	0.57	0.48	0.39	1.34	0.3	leucine rich repeat protein, putative
EAH_00002880	5	0.38	0.31	0.85	0.36	0.49	0.9	0.54	0.29	0.77	0.37	0.51	2.16	0.24	0.25	0.66	0.38	na	na	na	hypothetical protein, conserved
EAH_00001680	6	0.38	0.28	0.56	0.49	0.24	0.61	0.4	0.37	0.92	0.4	0.37	1.41	0.26	0.19	0.42	0.45	0.35	1.29	0.27	geranylgeranyl transferase type II beta subunit, putative
EAH_00001580	6	0.38	0.29	0.59	0.49	0.25	0.66	0.38	0.2	0.51	0.38	0.61	2.34	0.26	0.25	0.53	0.47	0.6	1.83	0.32	hypothetical protein, conserved
EAH_00000450	6	0.38	0.27	1.42	0.19	0.54	1.5	0.36	0.6	1.38	0.44	1.03	2.62	0.39	0.73	1.38	0.53	0.86	2.18	0.39	phosphoserine phosphatase, putative
EAH_00063890	5	0.37	0.26	0.73	0.36	0.27	0.55	0.49	0.19	0.41	0.46	0.36	1.56	0.23	0.18	0.56	0.32	NaN	NaN	NaN	hypothetical protein, conserved
EAH_00061200	2	0.37	na	na	na	na	na	na	0.25	0.75	0.33	na	na	na	0.53	1.32	0.4	na	na	na	hypothetical protein, conserved
EAH_00060840	4	0.37	0.46	1.22	0.38	0.46	1.4	0.33	0.47	1.12	0.43	na	na	na	0.4	1.17	0.34	na	na	na	hypothetical protein, conserved
EAH_00058170	2	0.37	NaN	NaN	NaN	0.39	1.65	0.23	0.78	1.54	0.51	NaN	NaN	NaN	na	na	na	NaN	NaN	NaN	hypothetical protein, conserved
EAH_00056020	6	0.37	0.32	0.91	0.36	0.23	0.81	0.28	0.31	0.78	0.39	0.46	1.2	0.38	0.28	0.63	0.44	0.49	1.23	0.4	hypothetical protein, conserved
EAH_00054490	5	0.37	0.33	1.23	0.27	0.33	1.09	0.3	0.59	1.35	0.44	0.55	1.02	0.55	0.26	0.97	0.27	na	na	na	hypothetical protein, conserved
EAH_00053430	4	0.37	0.48	1.72	0.28	0.32	0.9	0.35	NaN	NaN	NaN	0.88	1.89	0.47	0.28	0.76	0.37	NaN	NaN	NaN	hypothetical protein, conserved
EAH_00052930	2	0.37	0.63	1.57	0.4	na	na	na	0.43	1.24	0.35	na	na	na	na	na	na	na	na	na	hypothetical protein, conserved
EAH_00052650	5	0.37	NaN	NaN	NaN	0.58	1.38	0.42	0.33	1.08	0.31	0.6	1.17	0.51	0.38	1.27	0.3	0.87	2.68	0.32	hypothetical protein, conserved
EAH_00050700	5	0.37	0.2	1.18	0.17	1.06	1.3	0.81	na	na	na	0.36	1.14	0.31	0.44	1.47	0.3	0.44	1.78	0.25	hypothetical protein, conserved
EAH_00050530	1	0.37	NaN	NaN	NaN	0.52	1.39	0.37	na	na	na	NaN	NaN	NaN	na	na	na	NaN	NaN	NaN	hypothetical protein, conserved
EAH_00049900	3	0.37	0.23	0.53	0.43	0.28	0.82	0.34	0.24	0.71	0.35	na	na	na	na	na	na	na	na	na	hypothetical protein, conserved
EAH_00049670	4	0.37	0.36	0.76	0.47	0.48	1.44	0.34	0.36	1.03	0.35	na	na	na	0.39	1.24	0.31	na	na	na	hypothetical protein, conserved
EAH_00049240	5	0.37	na	na	na	0.56	2.36	0.24	0.83	2.02	0.41	0.95	2.03	0.47	0.83	1.33	0.62	0.33	2.75	0.12	hypothetical protein, conserved
EAH_00047630	1	0.37	0.26	0.7	0.37	na	na	na	na	na	na	na	na	na	na	na	na	na	na	na	hypothetical protein, conserved
EAH_00042170	5	0.37	0.44	1.42	0.31	0.31	2.06	0.15	na	na	na	1.3	1.84	0.71	0.35	1.21	0.29	0.92	2.33	0.39	hypothetical protein, conserved
EAH_00041790	5	0.37	0.96	1.93	0.5	0.81	2.27	0.36	na	na	na	1.21	2.13	0.57	0.19	0.83	0.23	0.48	2.52	0.19	glycosyl transferase, putative
EAH_00041550	2	0.37	0.37	0.89	0.42	na	na	na	na	na	na	NaN	NaN	NaN	na	na	na	0.57	1.77	0.32	hypothetical protein, conserved
EAH_00040100	5	0.37	0.31	0.96	0.32	0.49	1.05	0.46	0.3	0.99	0.3	0.49	1.41	0.34	na	na	na	0.59	1.39	0.43	hypothetical protein, conserved
EAH_00038760	6	0.37	0.32	0.78	0.41	0.29	0.76	0.39	0.22	0.63	0.35	0.41	1.23	0.34	0.32	0.78	0.41	0.39	1.31	0.29	hypothetical protein, conserved
EAH_00038670	6	0.37	0.25	0.73	0.34	0.42	0.88	0.48	0.29	0.73	0.39	0.43	1.4	0.31	0.36	0.93	0.39	0.43	1.35	0.32	cyclin, N-terminal domain-containing protein, putative
EAH_00037990	5	0.37	0.31	0.79	0.39	0.32	0.78	0.42	0.33	0.82	0.41	0.53	1.62	0.33	na	na	na	0.59	1.87	0.32	hypothetical protein, conserved
EAH_00036030	5	0.37	na	na	na	0.31	0.71	0.43	0.28	0.69	0.4	0.41	1.38	0.3	0.43	1.14	0.38	0.44	1.26	0.35	hypothetical protein, conserved
EAH_00033760	1	0.37	0.55	1.48	0.37	na	na	na	na	na	na	NaN	NaN	NaN	na	na	na	NaN	NaN	NaN	hypothetical protein, conserved
EAH_00032620	1	0.37	na	na	na	na	na	na	0.42	1.14	0.37	NaN	NaN	NaN	NaN	NaN	NaN	na	na	na	oligoendopeptidase F, putative
EAH_00031700	1	0.37	na	na	na	na	na	na	0.36	0.97	0.37	na	na	na	na	na	na	na	na	na	hypothetical protein, conserved
EAH_00030110	2	0.37	0.34	0.91	0.38	0.36	0.99	0.36	na	na	na	na	na	na	na	na	na	na	na	na	hypothetical protein, conserved
EAH_00028430	5	0.37	0.45	0.93	0.48	na	na	na	0.41	1.35	0.31	0.86	3.41	0.25	0.4	1.04	0.38	0.78	1.88	0.42	hypothetical protein, conserved
EAH_00027980	3	0.37	0.94	3.17	0.29	0.29	0.85	0.34	na	na	na	na	na	na	0.48	1.03	0.47	na	na	na	hypothetical protein, conserved
EAH_00026340	5	0.37	0.65	1.83	0.36	0.25	2.89	0.09	0.26	1.09	0.24	0.93	1.74	0.53	na	na	na	1.07	1.72	0.62	hypothetical protein, conserved
EAH_00018870	6	0.37	0.36	0.87	0.41	0.39	1.04	0.37	0.62	1.76	0.35	0.54	1.51	0.36	0.29	1.02	0.28	0.56	1.31	0.43	hypothetical protein, conserved
EAH_00016260	4	0.37	0.37	0.97	0.38	na	na	na	na	na	na	0.44	1.17	0.37	0.39	0.97	0.4	0.42	1.35	0.32	hypothetical protein, conserved
EAH_00015570	3	0.37	0.39	1.4	0.28	na	na	na	na	na	na	0.43	1.21	0.36	na	na	na	0.49	1.05	0.47	hypothetical protein, conserved
EAH_00008870	6	0.37	0.32	0.76	0.42	0.39	0.74	0.53	0.32	0.72	0.44	0.44	2.1	0.21	0.24	0.63	0.38	0.43	1.94	0.22	hypothetical protein, conserved
EAH_00006800	1	0.37	na	na	na	na	na	na	na	na	na	na	na	na	0.33	0.88	0.37	na	na	na	sag
EAH_00004840	5	0.37	0.56	1.2	0.47	na	na	na	0.31	0.83	0.37	0.56	2.11	0.27	0.38	0.77	0.5	0.51	2.08	0.25	hypothetical protein, conserved
EAH_00001940	3	0.37	1.01	3.37	0.3	na	na	na	0.98	1.89	0.52	na	na	na	0.58	2.01	0.29	na	na	na	hypothetical protein, conserved
EAH_00000140	6	0.37	0.29	0.61	0.48	0.28	0.57	0.48	0.24	0.6	0.4	0.31	1.45	0.22	0.25	0.55	0.45	0.31	1.61	0.19	ulp1 protease family, C-terminal catalytic domain-containing protein, putative
EAH_00067160	1	0.36	na	na	na	na	na	na	na	na	na	na	na	na	0.32	0.9	0.36	na	na	na	hypothetical protein, conserved
EAH_00060320	2	0.36	na	na	na	na	na	na	0.31	1.39	0.23	na	na	na	0.41	0.85	0.49	na	na	na	hypothetical protein, conserved
EAH_00059460	2	0.36	0.63	1.33	0.48	0.41	1.73	0.24	na	na	na	na	na	na	na	na	na	na	na	na	hypothetical protein, conserved
EAH_00058870	1	0.36	na	na	na	na	na	na	0.25	0.69	0.36	na	na	na	na	na	na	na	na	na	hypothetical protein, conserved
EAH_00055220	1	0.36	na	na	na	na	na	na	na	na	na	NaN	NaN	NaN	0.52	1.47	0.36	NaN	NaN	NaN	TPR domain containing protein, putative
EAH_00053470	6	0.36	0.3	0.54	0.55	0.33	0.92	0.35	0.36	1.02	0.35	0.39	1.86	0.21	0.4	0.86	0.46	0.4	1.84	0.22	hypothetical protein, conserved
EAH_00052780	6	0.36	0.22	0.65	0.33	0.3	0.66	0.45	0.2	0.46	0.44	0.45	1.55	0.29	0.24	0.6	0.4	0.44	1.75	0.25	hypothetical protein, conserved
EAH_00052360	1	0.36	na	na	na	na	na	na	na	na	na	na	na	na	na	na	na	0.42	1.18	0.36	hypothetical protein, conserved
EAH_00050820	5	0.36	0.32	0.94	0.34	0.33	0.84	0.39	na	na	na	0.6	1.65	0.36	0.38	1.04	0.37	0.56	1.55	0.36	hypothetical protein, conserved
EAH_00050140	5	0.36	0.34	0.85	0.4	0.33	0.88	0.38	na	na	na	0.49	1.72	0.28	0.28	0.88	0.32	0.71	1.67	0.42	hypothetical protein, conserved
EAH_00049740	2	0.36	NaN	NaN	NaN	0.39	1.04	0.38	na	na	na	na	na	na	0.43	1.26	0.34	na	na	na	hypothetical protein, conserved
EAH_00047520	2	0.36	NaN	NaN	NaN	na	na	na	na	na	na	0.59	1.52	0.39	na	na	na	0.57	1.72	0.33	hypothetical protein, conserved
EAH_00047060	4	0.36	0.3	0.8	0.38	0.31	1.04	0.3	0.19	0.53	0.36	0.66	1.64	0.4	na	na	na	NaN	NaN	NaN	hypothetical protein, conserved
EAH_00045130	5	0.36	0.32	0.75	0.42	0.36	1.18	0.31	0.34	0.77	0.44	na	na	na	0.26	1.01	0.26	0.58	1.54	0.38	hypothetical protein, conserved
EAH_00044980	5	0.36	0.34	0.92	0.37	0.29	0.84	0.35	0.38	0.86	0.44	0.52	2.33	0.22	0.28	0.64	0.43	na	na	na	kinesin motor domain-containing protein, putative
EAH_00044560	4	0.36	0.18	0.55	0.33	0.22	0.82	0.28	0.84	1.61	0.52	na	na	na	na	na	na	0.35	1.11	0.31	hypothetical protein, conserved
EAH_00044320	3	0.36	0.33	1.02	0.32	na	na	na	0.45	1.12	0.4	na	na	na	0.51	1.46	0.35	na	na	na	hypothetical protein, conserved
EAH_00043410	6	0.36	0.38	0.92	0.41	0.33	1.14	0.29	0.26	0.87	0.3	0.57	1.56	0.36	0.48	1.34	0.36	0.68	1.61	0.42	hypothetical protein, conserved
EAH_00043140	6	0.36	0.38	1.14	0.33	0.43	1.15	0.38	0.43	1.11	0.38	0.48	1.14	0.43	0.39	1.51	0.26	0.42	1.04	0.4	hypothetical protein, conserved
EAH_00042200	1	0.36	na	na	na	na	na	na	na	na	na	na	na	na	0.34	0.93	0.36	na	na	na	hypothetical protein, conserved
EAH_00041380	5	0.36	0.48	0.96	0.5	0.4	1.15	0.35	0.39	0.94	0.42	0.4	1.63	0.24	0.44	1.4	0.31	na	na	na	hypothetical protein, conserved
EAH_00040970	2	0.36	na	na	na	0.35	1.03	0.34	na	na	na	na	na	na	0.39	1.01	0.39	na	na	na	hypothetical protein, conserved
EAH_00040860	3	0.36	0.57	1.63	0.35	na	na	na	0.54	1.15	0.47	0.55	2.04	0.27	na	na	na	na	na	na	hypothetical protein, conserved
EAH_00040340	5	0.36	na	na	na	0.51	1.44	0.35	0.58	1.32	0.44	0.42	1.24	0.34	0.34	1	0.34	0.4	1.17	0.34	hypothetical protein, conserved
EAH_00038680	4	0.36	0.23	0.77	0.3	0.34	0.88	0.39	0.29	0.96	0.3	na	na	na	0.38	0.88	0.43	na	na	na	hypothetical protein, conserved
EAH_00038230	2	0.36	0.56	1.84	0.3	na	na	na	na	na	na	NaN	NaN	NaN	0.59	1.41	0.42	na	na	na	hypothetical protein, conserved
EAH_00037980	5	0.36	0.16	0.42	0.39	0.12	0.78	0.15	0.16	0.53	0.31	0.14	0.65	0.22	na	na	na	0.54	0.75	0.72	hypothetical protein, conserved
EAH_00037530	2	0.36	NaN	NaN	NaN	0.3	1.4	0.22	na	na	na	0.9	1.79	0.5	na	na	na	NaN	NaN	NaN	proteasome PCI domain-containing protein, putative
EAH_00035680	2	0.36	0.34	0.81	0.43	0.37	1.31	0.29	na	na	na	na	na	na	na	na	na	na	na	na	hypothetical protein, conserved
EAH_00035130	3	0.36	0.28	1	0.28	na	na	na	0.3	0.83	0.36	na	na	na	0.36	0.78	0.46	na	na	na	hypothetical protein, conserved
EAH_00034920	4	0.36	0.42	0.83	0.5	na	na	na	0.28	0.7	0.41	0.53	2.26	0.23	na	na	na	0.57	2.03	0.28	hypothetical protein, conserved
EAH_00033920	6	0.36	0.25	0.65	0.38	0.24	0.7	0.35	0.24	0.61	0.4	0.48	1.48	0.32	0.23	0.61	0.37	0.48	1.55	0.31	hypothetical protein, conserved
EAH_00033100	3	0.36	na	na	na	na	na	na	na	na	na	0.61	1.67	0.36	0.49	1.59	0.31	0.54	1.32	0.41	hypothetical protein, conserved
EAH_00032310	5	0.36	0.2	0.6	0.34	0.25	0.63	0.4	0.22	0.54	0.41	0.39	1.72	0.23	0.23	0.58	0.4	na	na	na	hypothetical protein, conserved
EAH_00031080	2	0.36	0.34	0.85	0.4	na	na	na	na	na	na	NaN	NaN	NaN	na	na	na	0.55	1.69	0.33	hypothetical protein, conserved
EAH_00028840	1	0.36	na	na	na	na	na	na	0.36	1.01	0.36	na	na	na	na	na	na	na	na	na	hypothetical protein, conserved
EAH_00028720	2	0.36	0.53	1.59	0.34	na	na	na	0.5	1.27	0.39	NaN	NaN	NaN	na	na	na	NaN	NaN	NaN	hypothetical protein, conserved
EAH_00028150	2	0.36	0.37	0.97	0.38	na	na	na	0.49	1.5	0.33	na	na	na	na	na	na	na	na	na	hypothetical protein, conserved
EAH_00027850	5	0.36	0.28	0.72	0.38	0.21	0.66	0.32	na	na	na	0.44	1.01	0.44	0.22	0.8	0.27	0.4	0.98	0.4	hypothetical protein, conserved
EAH_00025620	3	0.36	0.69	1.97	0.35	0.7	2.3	0.3	0.45	1.06	0.43	na	na	na	NaN	NaN	NaN	na	na	na	hypothetical protein, conserved
EAH_00025270	5	0.36	0.24	0.59	0.4	0.28	0.69	0.41	0.23	0.61	0.38	0.43	1.46	0.29	na	na	na	0.44	1.46	0.3	hypothetical protein, conserved
EAH_00021960	5	0.36	0.49	1.04	0.47	0.39	1.15	0.34	na	na	na	0.62	2.35	0.27	0.39	1.13	0.35	0.67	1.89	0.35	hypothetical protein, conserved
EAH_00017080	5	0.36	0.25	0.85	0.29	na	na	na	0.35	0.66	0.54	0.41	1.54	0.27	0.54	1.38	0.39	0.41	1.38	0.3	zinc finger DHHC domain-containing protein, putative
EAH_00016700	2	0.36	0.28	0.88	0.32	0.3	0.75	0.4	na	na	na	na	na	na	na	na	na	na	na	na	hypothetical protein, conserved
EAH_00016490	5	0.36	0.42	0.95	0.44	0.78	1.9	0.41	0.42	1.06	0.4	NaN	NaN	NaN	0.74	2.65	0.28	0.58	1.97	0.29	hypothetical protein, conserved
EAH_00015650	3	0.36	0.5	1.32	0.38	0.28	0.72	0.4	na	na	na	na	na	na	0.38	1.2	0.32	na	na	na	hypothetical protein, conserved
EAH_00015380	6	0.36	0.32	1.11	0.28	0.3	0.88	0.34	0.28	0.74	0.38	0.41	1.43	0.29	0.41	0.75	0.54	0.47	1.49	0.31	hypothetical protein, conserved
EAH_00013360	4	0.36	0.57	1.61	0.35	0.6	1.49	0.4	0.57	1.54	0.37	na	na	na	1.02	3.22	0.32	na	na	na	hypothetical protein, conserved
EAH_00012210	2	0.36	0.22	0.65	0.34	0.23	0.62	0.37	na	na	na	na	na	na	na	na	na	na	na	na	hypothetical protein, conserved
EAH_00011560	6	0.36	0.24	0.56	0.43	0.33	0.95	0.35	0.35	1.03	0.34	0.48	1.39	0.34	0.27	0.73	0.37	0.46	1.35	0.34	hypothetical protein, conserved
EAH_00010430	6	0.36	0.26	0.7	0.37	0.25	1.15	0.22	0.71	0.89	0.8	0.38	1.31	0.29	0.29	1.25	0.23	0.34	1.25	0.28	hypothetical protein, conserved
EAH_00008940	5	0.36	na	na	na	0.43	0.92	0.47	0.41	1.53	0.27	0.63	2.07	0.31	0.35	0.65	0.54	0.68	3.27	0.21	hypothetical protein, conserved
EAH_00008260	3	0.36	na	na	na	0.23	0.73	0.31	na	na	na	0.71	3.01	0.24	0.38	0.72	0.52	na	na	na	hypothetical protein, conserved
EAH_00007680	3	0.36	na	na	na	na	na	na	0.48	1.17	0.4	0.57	1.55	0.37	na	na	na	0.69	2.16	0.32	hypothetical protein, conserved
EAH_00005180	6	0.36	0.24	1.04	0.23	0.39	0.89	0.44	0.34	0.86	0.4	0.49	1.36	0.36	0.37	0.89	0.42	0.47	1.38	0.34	hypothetical protein, conserved
EAH_00004400	6	0.36	0.23	0.59	0.39	0.27	0.66	0.41	0.25	0.66	0.38	0.45	1.45	0.31	0.23	0.6	0.39	0.43	1.59	0.27	hypothetical protein, conserved
EAH_00004160	4	0.36	0.19	0.55	0.35	0.24	0.68	0.36	0.22	0.52	0.42	NaN	NaN	NaN	0.21	0.7	0.29	NaN	NaN	NaN	hypothetical protein, conserved
EAH_00000020	2	0.36	na	na	na	0.39	2.72	0.14	0.6	1.03	0.58	na	na	na	NaN	NaN	NaN	NaN	NaN	NaN	hypothetical protein, conserved
EAH_00066470	3	0.35	0.35	0.98	0.36	na	na	na	0.23	0.53	0.44	na	na	na	0.2	0.83	0.25	na	na	na	hypothetical protein, conserved
EAH_00065550	6	0.35	0.27	0.67	0.4	0.3	0.76	0.39	0.26	0.59	0.44	0.41	1.53	0.27	0.27	0.74	0.36	0.36	1.48	0.24	hypothetical protein, conserved
EAH_00065340	3	0.35	na	na	na	0.38	1.09	0.35	na	na	na	na	na	na	0.37	0.76	0.48	0.54	2.3	0.23	hypothetical protein, conserved
EAH_00065020	4	0.35	0.38	2.15	0.18	1.19	2.1	0.56	1.01	1.92	0.53	0.5	3.24	0.15	na	na	na	NaN	NaN	NaN	hypothetical protein, conserved
EAH_00062050	4	0.35	0.46	1.67	0.28	0.62	1.51	0.41	0.55	1.5	0.37	na	na	na	0.53	1.59	0.33	na	na	na	hypothetical protein, conserved
EAH_00059810	6	0.35	0.42	1.3	0.33	0.25	1.1	0.23	0.44	0.96	0.46	0.52	1.42	0.37	0.41	1.24	0.33	0.64	1.67	0.38	GATA zinc finger domain-containing protein, putative
EAH_00058480	6	0.35	0.34	1.11	0.31	0.31	0.88	0.36	0.41	1.01	0.41	0.5	1.63	0.31	0.93	2.66	0.35	0.47	1.37	0.34	hypothetical protein, conserved
EAH_00057880	2	0.35	na	na	na	na	na	na	0.26	1.27	0.2	na	na	na	0.52	1.03	0.5	na	na	na	hypothetical protein, conserved
EAH_00051670	2	0.35	0.41	1.31	0.31	na	na	na	na	na	na	0.56	1.45	0.38	na	na	na	na	na	na	hypothetical protein, conserved
EAH_00051340	2	0.35	na	na	na	0.48	1.19	0.41	na	na	na	na	na	na	0.3	1.03	0.29	na	na	na	hypothetical protein, conserved
EAH_00047960	3	0.35	0.39	1.19	0.33	na	na	na	na	na	na	0.61	1.59	0.39	na	na	na	0.57	1.68	0.34	hypothetical protein, conserved
EAH_00047760	6	0.35	0.49	0.82	0.59	0.27	1.7	0.16	0.35	1	0.35	0.47	1.81	0.26	0.35	0.87	0.41	0.85	2.48	0.34	hypothetical protein, conserved
EAH_00047550	2	0.35	0.33	1.15	0.29	NaN	NaN	NaN	na	na	na	NaN	NaN	NaN	0.49	1.19	0.41	na	na	na	Leucine-rich protein, related
EAH_00046190	4	0.35	0.43	0.99	0.43	na	na	na	0.57	1.37	0.42	na	na	na	0.41	1.02	0.4	0.35	2.12	0.17	hypothetical protein, conserved
EAH_00046100	5	0.35	0.26	0.72	0.35	0.35	0.98	0.36	na	na	na	0.44	1.42	0.31	0.38	0.95	0.4	0.46	1.54	0.3	hypothetical protein, conserved
EAH_00045950	2	0.35	0.32	0.76	0.42	na	na	na	0.3	1.1	0.28	na	na	na	na	na	na	NaN	NaN	NaN	hypothetical protein, conserved
EAH_00045410	2	0.35	0.36	1.22	0.29	na	na	na	na	na	na	na	na	na	0.45	1.11	0.4	na	na	na	hypothetical protein, conserved
EAH_00045160	6	0.35	0.27	0.72	0.38	0.28	0.75	0.37	0.24	0.62	0.39	0.56	2.15	0.26	0.27	0.71	0.38	0.59	1.83	0.32	Proteophosphoglycan 5, related
EAH_00042890	4	0.35	na	na	na	0.43	1.18	0.37	0.3	0.57	0.53	na	na	na	0.27	0.92	0.3	0.4	1.88	0.21	hypothetical protein, conserved
EAH_00042610	5	0.35	0.24	3.9	0.06	0.23	1.27	0.18	0.23	1.12	0.21	na	na	na	0.24	1.65	0.15	0.94	0.82	1.14	protamine P1, putative
EAH_00040640	2	0.35	0.41	1.03	0.4	na	na	na	na	na	na	0.49	1.59	0.31	na	na	na	na	na	na	hypothetical protein, conserved
EAH_00040480	5	0.35	0.22	0.64	0.35	0.95	2.48	0.38	0.27	0.7	0.39	0.27	0.95	0.28	0.14	0.37	0.37	na	na	na	hypothetical protein, conserved
EAH_00038730	3	0.35	0.42	1.68	0.25	NaN	NaN	NaN	na	na	na	0.5	2.29	0.22	NaN	NaN	NaN	0.66	1.15	0.58	hypothetical protein, conserved
EAH_00034960	6	0.35	0.44	1.2	0.37	0.37	1.09	0.34	0.3	0.81	0.38	0.51	1.57	0.33	0.3	0.84	0.35	0.51	1.47	0.35	hypothetical protein, conserved
EAH_00034550	3	0.35	na	na	na	na	na	na	0.68	1.59	0.43	0.43	1.19	0.36	na	na	na	0.3	1.07	0.28	NifU-like domain-containing protein, putative
EAH_00033730	6	0.35	0.16	0.61	0.27	0.22	0.6	0.38	0.28	0.41	0.68	0.31	1.46	0.21	0.17	0.55	0.31	0.33	1.46	0.22	hypothetical protein, conserved
EAH_00028490	5	0.35	0.55	1.18	0.47	0.42	1.15	0.36	na	na	na	0.68	2.46	0.28	0.39	1	0.39	0.69	2.59	0.27	hypothetical protein, conserved
EAH_00027900	4	0.35	0.24	1.16	0.2	0.32	1.88	0.17	na	na	na	1.19	1.47	0.81	na	na	na	0.29	1.32	0.22	Heat repeat family protein, related, related
EAH_00027680	5	0.35	0.26	1.46	0.18	0.25	0.85	0.3	na	na	na	0.58	1.1	0.52	0.2	0.48	0.42	0.42	1.18	0.35	hypothetical protein, conserved
EAH_00026600	1	0.35	na	na	na	na	na	na	0.27	0.78	0.35	na	na	na	na	na	na	na	na	na	hypothetical protein, conserved
EAH_00023500	3	0.35	0.33	0.8	0.41	na	na	na	0.42	1.24	0.34	na	na	na	0.3	1	0.3	na	na	na	hypothetical protein, conserved
EAH_00022610	5	0.35	0.38	0.92	0.42	0.35	0.94	0.37	0.29	0.79	0.37	NaN	NaN	NaN	0.4	1.12	0.36	0.72	2.92	0.25	hypothetical protein, conserved
EAH_00022490	6	0.35	0.22	0.68	0.32	0.3	0.76	0.4	0.24	0.57	0.42	0.52	1.89	0.28	0.22	0.63	0.35	0.53	1.7	0.31	hypothetical protein, conserved
EAH_00022140	3	0.35	0.38	0.87	0.44	0.33	0.97	0.34	na	na	na	0.52	1.94	0.27	na	na	na	na	na	na	hypothetical protein, conserved
EAH_00021760	5	0.35	na	na	na	0.58	1.61	0.36	0.61	2.44	0.25	0.57	1.51	0.38	0.58	1.35	0.43	0.61	1.88	0.32	hypothetical protein, conserved
EAH_00017900	4	0.35	0.5	0.97	0.51	NaN	NaN	NaN	0.3	0.83	0.36	0.38	0.97	0.39	0.48	3.08	0.16	na	na	na	hypothetical protein, conserved
EAH_00017430	5	0.35	0.24	0.75	0.32	0.3	0.85	0.35	na	na	na	0.42	1.09	0.39	0.25	0.8	0.32	0.41	1.12	0.37	hypothetical protein, conserved
EAH_00014980	4	0.35	0.47	1.47	0.32	0.46	1.34	0.34	0.56	2.18	0.26	na	na	na	0.39	0.8	0.48	na	na	na	hypothetical protein, conserved
EAH_00013830	4	0.35	na	na	na	0.28	0.71	0.39	na	na	na	0.38	1.42	0.27	0.36	0.86	0.42	0.42	1.33	0.32	hypothetical protein, conserved
EAH_00010680	5	0.35	0.18	0.57	0.31	0.17	0.64	0.27	na	na	na	1.09	2.18	0.5	0.19	0.64	0.3	1.03	2.78	0.37	hypothetical protein, conserved
EAH_00010540	6	0.35	0.35	1.1	0.32	0.42	0.95	0.45	0.35	0.78	0.45	0.57	2.75	0.21	0.34	0.86	0.4	0.63	2.56	0.25	hypothetical protein, conserved
EAH_00010490	6	0.35	0.24	0.72	0.33	0.4	0.8	0.5	0.26	0.67	0.39	0.52	1.83	0.29	0.23	0.68	0.33	0.41	1.7	0.24	hypothetical protein, conserved
EAH_00008500	1	0.35	na	na	na	na	na	na	na	na	na	0.48	1.38	0.35	na	na	na	na	na	na	hypothetical protein, conserved
EAH_00006310	5	0.35	na	na	na	0.58	1.31	0.44	0.46	1.34	0.35	0.54	1.58	0.34	0.49	1.29	0.38	0.51	2.08	0.25	hypothetical protein, conserved
EAH_00004420	6	0.35	0.26	0.76	0.34	0.3	0.78	0.38	0.34	0.66	0.52	0.45	1.62	0.28	0.24	0.68	0.35	0.42	1.98	0.21	hypothetical protein, conserved
EAH_00003640	5	0.35	0.14	0.51	0.28	na	na	na	0.16	0.4	0.41	0.49	1.19	0.41	0.14	0.82	0.17	0.44	0.97	0.46	hypothetical protein, conserved
EAH_00002270	4	0.35	na	na	na	0.5	1.21	0.41	na	na	na	0.63	1.6	0.4	0.48	1.5	0.32	0.6	2.24	0.27	hypothetical protein, conserved
EAH_00001100	6	0.35	0.32	0.93	0.35	0.36	0.74	0.49	0.36	0.73	0.5	0.39	2.53	0.15	0.4	0.88	0.46	0.38	2.43	0.15	hypothetical protein, conserved
EAH_00000030	1	0.35	na	na	na	na	na	na	na	na	na	NaN	NaN	NaN	na	na	na	0.53	1.54	0.35	zinc finger DHHC domain-containing protein, putative
EAH_00065350	3	0.34	na	na	na	na	na	na	0.29	0.67	0.43	na	na	na	0.27	0.74	0.37	0.49	2.07	0.24	transcription factor BTF3, putative
EAH_00063350	2	0.34	0.51	1.99	0.26	na	na	na	0.62	1.49	0.42	na	na	na	na	na	na	na	na	na	hypothetical protein, conserved
EAH_00059450	4	0.34	0.28	1.55	0.18	0.32	1.44	0.22	na	na	na	0.62	1.19	0.52	na	na	na	0.58	1.33	0.44	hypothetical protein, conserved
EAH_00057700	6	0.34	0.39	0.83	0.47	0.27	0.6	0.45	0.25	0.7	0.36	0.31	1.44	0.21	0.37	1.15	0.32	0.29	1.45	0.2	hypothetical protein, conserved
EAH_00055540	1	0.34	na	na	na	na	na	na	na	na	na	NaN	NaN	NaN	na	na	na	0.63	1.83	0.34	hypothetical protein, conserved
EAH_00055180	4	0.34	0.44	0.88	0.49	na	na	na	0.47	1.61	0.29	0.51	2.45	0.21	0.41	1.14	0.36	na	na	na	hypothetical protein, conserved
EAH_00054180	5	0.34	0.98	2.11	0.46	0.4	0.89	0.45	na	na	na	0.64	3.38	0.19	0.89	3.89	0.23	0.62	1.67	0.37	hypothetical protein, conserved
EAH_00051930	1	0.34	na	na	na	na	na	na	na	na	na	NaN	NaN	NaN	0.39	1.14	0.34	NaN	NaN	NaN	hypothetical protein, conserved
EAH_00051570	6	0.34	0.26	0.72	0.36	0.29	0.63	0.47	0.44	1.36	0.33	0.44	1.76	0.25	0.26	0.64	0.4	0.39	1.83	0.22	hypothetical protein, conserved
EAH_00049230	1	0.34	0.79	2.29	0.34	na	na	na	na	na	na	na	na	na	na	na	na	na	na	na	hypothetical protein, conserved
EAH_00048510	1	0.34	na	na	na	na	na	na	na	na	na	na	na	na	0.59	1.71	0.34	na	na	na	hypothetical protein, conserved
EAH_00048410	5	0.34	0.31	0.92	0.34	0.26	1.1	0.23	na	na	na	0.45	1.23	0.37	0.35	0.72	0.49	0.4	1.46	0.27	hypothetical protein, conserved
EAH_00046860	3	0.34	0.23	0.62	0.37	0.29	0.99	0.29	na	na	na	0.41	1.16	0.35	na	na	na	na	na	na	hypothetical protein, conserved
EAH_00045170	3	0.34	0.39	1.13	0.35	na	na	na	0.5	2.31	0.22	na	na	na	0.47	1.04	0.46	na	na	na	PHD-zinc finger (C3HC4 type) protein, putative
EAH_00044790	4	0.34	0.3	0.86	0.36	0.34	1.08	0.32	0.23	0.74	0.32	NaN	NaN	NaN	0.26	0.74	0.35	NaN	NaN	NaN	GM23476, related
EAH_00044440	3	0.34	0.25	1.26	0.2	na	na	na	0.43	1.69	0.25	na	na	na	0.75	1.31	0.57	na	na	na	hypothetical protein, conserved
EAH_00043770	2	0.34	na	na	na	0.4	1.27	0.32	na	na	na	0.59	1.65	0.36	na	na	na	NaN	NaN	NaN	hypothetical protein, conserved
EAH_00043650	4	0.34	0.41	1.08	0.38	0.33	1.03	0.32	na	na	na	0.41	1.94	0.21	0.55	1.22	0.45	na	na	na	hypothetical protein, conserved
EAH_00042020	1	0.34	na	na	na	0.45	1.35	0.34	na	na	na	na	na	na	NaN	NaN	NaN	na	na	na	hypothetical protein, conserved
EAH_00041280	5	0.34	0.22	0.61	0.36	na	na	na	0.23	0.74	0.32	0.35	1.27	0.27	0.2	0.49	0.41	0.37	1.1	0.34	hypothetical protein, conserved
EAH_00041110	5	0.34	na	na	na	0.4	1.17	0.35	0.35	0.97	0.37	0.49	1.35	0.36	0.41	1.35	0.31	0.53	1.63	0.32	hypothetical protein, conserved
EAH_00040940	1	0.34	na	na	na	0.38	1.1	0.34	na	na	na	NaN	NaN	NaN	na	na	na	NaN	NaN	NaN	RNA-binding protein, putative
EAH_00040200	5	0.34	NaN	NaN	NaN	0.47	1.11	0.42	0.3	0.9	0.33	0.41	1.82	0.23	0.88	1.58	0.56	0.34	1.98	0.17	protein kinase, putative
EAH_00040080	3	0.34	na	na	na	0.28	0.66	0.42	na	na	na	0.54	2.08	0.26	0.34	1.05	0.33	NaN	NaN	NaN	hypothetical protein, conserved
EAH_00038740	5	0.34	na	na	na	0.46	1	0.46	0.37	0.81	0.46	0.42	1.88	0.22	0.34	0.92	0.37	0.42	1.96	0.21	protein kinase, putative
EAH_00036500	2	0.34	na	na	na	na	na	na	0.35	1.25	0.28	na	na	na	na	na	na	0.52	1.3	0.4	hypothetical protein, conserved
EAH_00035320	5	0.34	0.47	1.16	0.4	0.44	1.35	0.32	0.43	1.04	0.41	NaN	NaN	NaN	0.36	1.05	0.34	0.59	2.57	0.23	hypothetical protein, conserved
EAH_00035020	5	0.34	0.21	0.49	0.44	0.24	0.61	0.4	na	na	na	0.42	1.64	0.26	0.2	0.55	0.37	0.44	1.76	0.25	hypothetical protein, conserved
EAH_00034680	2	0.34	1.05	2.31	0.45	na	na	na	na	na	na	0.46	2.03	0.22	na	na	na	na	na	na	hypothetical protein, conserved
EAH_00033170	6	0.34	0.27	0.82	0.33	0.37	0.83	0.44	0.53	1.05	0.5	0.31	1.33	0.24	0.26	0.87	0.29	0.29	1.43	0.2	hypothetical protein, conserved
EAH_00031640	5	0.34	0.24	0.69	0.35	0.23	0.88	0.26	0.26	0.66	0.39	0.33	1.04	0.32	0.32	0.88	0.37	na	na	na	hypothetical protein, conserved
EAH_00030490	6	0.34	0.21	0.67	0.32	0.17	0.45	0.37	0.3	0.95	0.31	1.03	4.77	0.22	0.31	0.6	0.51	0.98	3.29	0.3	hypothetical protein, conserved
EAH_00028380	4	0.34	0.39	1.2	0.33	0.5	1.13	0.44	0.34	1.09	0.31	na	na	na	0.44	1.48	0.3	na	na	na	hypothetical protein, conserved
EAH_00027290	2	0.34	0.21	1.71	0.13	0.85	1.51	0.56	na	na	na	na	na	na	na	na	na	NaN	NaN	NaN	WD-40 repeat protein, putative
EAH_00026150	2	0.34	na	na	na	0.63	2.17	0.29	0.47	1.18	0.39	na	na	na	NaN	NaN	NaN	na	na	na	hypothetical protein, conserved
EAH_00026000	2	0.34	NaN	NaN	NaN	0.47	1.09	0.43	na	na	na	0.68	2.8	0.24	na	na	na	na	na	na	hypothetical protein, conserved
EAH_00025210	5	0.34	0.35	0.97	0.37	0.47	1.45	0.32	0.32	1.07	0.3	0.53	1.58	0.33	na	na	na	0.55	1.4	0.4	hypothetical protein, conserved
EAH_00024460	4	0.34	0.18	0.63	0.29	0.18	0.72	0.24	0.41	0.84	0.49	NaN	NaN	NaN	0.25	0.73	0.34	NaN	NaN	NaN	hypothetical protein, conserved
EAH_00024300	4	0.34	0.38	0.85	0.45	0.27	0.97	0.28	0.22	0.68	0.32	na	na	na	0.25	0.85	0.29	na	na	na	SET domain-containing protein, putative
EAH_00024050	6	0.34	0.33	1.11	0.29	0.38	0.76	0.49	0.37	0.83	0.44	0.27	1.59	0.17	0.31	0.64	0.49	0.25	1.87	0.14	hypothetical protein, conserved
EAH_00023630	3	0.34	0.21	1.16	0.18	0.27	1.09	0.25	na	na	na	na	na	na	0.85	1.49	0.57	na	na	na	hypothetical protein, conserved
EAH_00023070	3	0.34	0.48	1.13	0.42	0.27	1.1	0.25	na	na	na	na	na	na	0.42	1.25	0.34	na	na	na	hypothetical protein, conserved
EAH_00021470	5	0.34	0.29	0.85	0.35	0.31	0.93	0.33	na	na	na	0.4	1.28	0.31	0.31	0.71	0.43	0.37	1.31	0.28	hypothetical protein, conserved
EAH_00021240	5	0.34	0.25	0.75	0.34	0.26	0.6	0.43	0.24	0.62	0.38	0.45	2.08	0.22	0.22	0.64	0.35	na	na	na	hypothetical protein, conserved
EAH_00020490	3	0.34	na	na	na	na	na	na	0.13	0.61	0.21	0.51	1.42	0.36	na	na	na	0.46	1.06	0.44	hypothetical protein, conserved
EAH_00015530	6	0.34	0.3	0.91	0.33	0.26	0.84	0.31	0.27	0.8	0.34	0.44	1.71	0.26	0.35	0.68	0.51	0.46	1.72	0.27	hypothetical protein, conserved
EAH_00015250	4	0.34	1.22	1.9	0.64	0.27	0.74	0.37	na	na	na	0.26	2.1	0.12	0.16	0.67	0.23	NaN	NaN	NaN	hypothetical protein, conserved
EAH_00015070	4	0.34	0.43	1.47	0.29	0.58	1.67	0.35	0.34	0.85	0.4	na	na	na	0.29	0.89	0.33	na	na	na	glycerophosphoryl diester phosphodiesterase family domain containing protein, putative
EAH_00013230	5	0.34	0.18	1.02	0.17	0.25	0.45	0.55	na	na	na	0.44	1.33	0.33	0.16	0.43	0.38	0.49	1.75	0.28	hypothetical protein, conserved
EAH_00013140	2	0.34	na	na	na	0.54	1.31	0.41	na	na	na	na	na	na	0.34	1.23	0.27	na	na	na	hypothetical protein, conserved
EAH_00012590	4	0.34	0.41	1.19	0.35	0.48	1.43	0.34	0.45	1.48	0.31	na	na	na	0.41	1.13	0.36	na	na	na	hypothetical protein, conserved
EAH_00008460	5	0.34	0.61	0.85	0.71	0.18	0.88	0.2	0.18	1.16	0.15	0.33	1.02	0.32	0.45	1.52	0.29	na	na	na	hypothetical protein, conserved
EAH_00008020	5	0.34	0.34	1.15	0.29	0.79	1.72	0.46	0.32	0.96	0.34	0.41	1.62	0.25	0.59	1.58	0.37	na	na	na	hypothetical protein, conserved
EAH_00007570	6	0.34	0.19	0.53	0.35	0.26	0.7	0.38	0.19	0.57	0.34	0.47	1.8	0.26	0.23	0.47	0.49	0.49	2.28	0.21	hypothetical protein, conserved
EAH_00006020	5	0.34	na	na	na	0.33	0.99	0.33	0.39	0.9	0.43	0.56	2.2	0.26	0.35	0.89	0.4	0.59	1.96	0.3	hypothetical protein, conserved
EAH_00005980	4	0.34	0.56	2.03	0.28	0.5	1.4	0.35	0.38	0.99	0.38	na	na	na	0.51	1.5	0.34	na	na	na	hypothetical protein, conserved
EAH_00005770	5	0.34	0.41	1.28	0.32	0.61	0.86	0.7	0.4	1.74	0.23	0.33	2.43	0.14	0.36	1.22	0.29	na	na	na	hypothetical protein, conserved
EAH_00003790	6	0.34	0.42	0.96	0.43	0.29	0.68	0.42	0.26	0.68	0.39	0.44	2.39	0.18	0.29	0.78	0.37	0.41	1.51	0.27	hypothetical protein, conserved
EAH_00002040	6	0.34	0.25	0.55	0.45	0.24	0.69	0.35	0.2	0.46	0.43	0.37	1.51	0.25	0.19	0.55	0.34	0.4	1.73	0.23	hypothetical protein, conserved
EAH_00001500	5	0.34	0.37	1	0.37	0.5	1.08	0.46	0.39	0.93	0.42	0.43	1.79	0.24	na	na	na	0.44	2.18	0.2	OTU-like cysteine protease domain-containing protein, putative
EAH_00063520	1	0.33	na	na	na	0.55	1.68	0.33	na	na	na	NaN	NaN	NaN	na	na	na	NaN	NaN	NaN	NOL1/NOP2/sun family domain-containing protein, putative
EAH_00060550	3	0.33	0.59	1.18	0.5	0.34	1.65	0.2	0.33	1.11	0.3	NaN	NaN	NaN	NaN	NaN	NaN	na	na	na	hypothetical protein, conserved
EAH_00060530	4	0.33	0.32	0.78	0.41	na	na	na	0.37	1.18	0.31	0.67	1.69	0.39	0.28	1.35	0.21	na	na	na	hypothetical protein, conserved
EAH_00060300	3	0.33	na	na	na	0.48	1.63	0.3	0.51	1.3	0.39	0.83	2.69	0.31	na	na	na	NaN	NaN	NaN	hypothetical protein, conserved
EAH_00059250	2	0.33	na	na	na	na	na	na	na	na	na	0.34	0.87	0.39	0.9	3.46	0.26	na	na	na	hypothetical protein, conserved
EAH_00056810	2	0.33	na	na	na	na	na	na	na	na	na	0.63	1.91	0.33	na	na	na	0.56	1.75	0.32	hypothetical protein, conserved
EAH_00055200	1	0.33	na	na	na	na	na	na	na	na	na	NaN	NaN	NaN	0.43	1.3	0.33	na	na	na	hypothetical protein, conserved
EAH_00054720	5	0.33	0.52	2.65	0.2	na	na	na	0.53	1.51	0.35	0.67	2.39	0.28	0.66	2.35	0.28	0.98	1.89	0.52	hypothetical protein, conserved
EAH_00054350	1	0.33	na	na	na	na	na	na	0.56	1.67	0.33	NaN	NaN	NaN	na	na	na	NaN	NaN	NaN	hypothetical protein, conserved
EAH_00050950	5	0.33	0.31	0.86	0.36	0.3	0.8	0.38	na	na	na	0.61	2.17	0.28	0.39	1.15	0.34	0.58	2.09	0.28	hypothetical protein, conserved
EAH_00049980	6	0.33	0.27	0.72	0.38	0.26	0.9	0.29	0.5	1.66	0.3	0.4	2.03	0.2	0.44	0.87	0.5	0.46	1.56	0.3	hypothetical protein, conserved
EAH_00049160	3	0.33	0.17	1.83	0.09	na	na	na	na	na	na	0.36	0.82	0.43	0.85	1.83	0.47	na	na	na	hypothetical protein, conserved
EAH_00048470	3	0.33	0.63	1.48	0.43	na	na	na	na	na	na	0.64	1.69	0.38	0.36	1.86	0.2	NaN	NaN	NaN	hypothetical protein, conserved
EAH_00046570	5	0.33	na	na	na	0.29	0.89	0.32	0.26	0.74	0.36	0.4	1.37	0.29	0.33	0.89	0.37	0.39	1.33	0.3	hypothetical protein, conserved
EAH_00046180	2	0.33	0.44	1.18	0.37	na	na	na	na	na	na	na	na	na	0.46	1.63	0.28	na	na	na	hypothetical protein, conserved
EAH_00046140	5	0.33	0.28	0.77	0.36	0.27	0.97	0.28	na	na	na	0.46	1.51	0.31	0.29	0.69	0.42	0.41	1.31	0.31	hypothetical protein, conserved
EAH_00046050	5	0.33	0.29	1.35	0.21	na	na	na	0.33	1.05	0.31	0.48	1.26	0.38	0.38	1.34	0.28	0.51	1.04	0.49	hypothetical protein, conserved
EAH_00045060	4	0.33	0.29	1.05	0.27	0.31	0.81	0.38	na	na	na	0.41	1.2	0.34	0.32	1.03	0.31	na	na	na	hypothetical protein, conserved
EAH_00043620	6	0.33	0.33	1.31	0.25	0.39	1.07	0.36	0.32	1.51	0.21	0.37	0.9	0.41	0.53	1.05	0.51	0.43	1.78	0.24	hypothetical protein, conserved
EAH_00042640	2	0.33	na	na	na	0.29	0.94	0.31	0.55	1.53	0.36	na	na	na	na	na	na	na	na	na	hypothetical protein, conserved
EAH_00041920	6	0.33	0.18	0.62	0.3	0.19	0.64	0.29	0.21	0.54	0.4	0.37	1.24	0.3	0.23	0.65	0.35	0.38	1.19	0.32	hypothetical protein, conserved
EAH_00040620	4	0.33	na	na	na	0.3	1.94	0.15	0.33	0.88	0.38	0.51	0.88	0.58	0.27	1.36	0.2	na	na	na	DNA-directed RNA polymerase alpha chain, putative
EAH_00040610	4	0.33	na	na	na	0.12	1.75	0.07	0.31	1.84	0.17	0.75	1.63	0.46	na	na	na	0.81	1.32	0.61	hypothetical protein, conserved
EAH_00040280	2	0.33	na	na	na	0.1	0.68	0.15	0.4	0.79	0.51	na	na	na	na	na	na	na	na	na	hypothetical protein, conserved
EAH_00037640	6	0.33	0.54	0.84	0.64	0.22	0.82	0.26	0.28	1.01	0.28	0.29	1.11	0.26	0.22	0.66	0.34	0.21	1.03	0.2	hypothetical protein, conserved
EAH_00036700	1	0.33	0.47	1.42	0.33	na	na	na	na	na	na	na	na	na	na	na	na	na	na	na	hypothetical protein, conserved
EAH_00035910	4	0.33	0.29	0.79	0.37	0.32	1.25	0.26	0.39	1.15	0.34	na	na	na	0.41	1.12	0.36	na	na	na	hypothetical protein, conserved
EAH_00035650	6	0.33	0.27	0.66	0.41	0.27	0.69	0.4	0.19	0.73	0.26	0.43	1.77	0.24	0.26	0.71	0.37	0.42	1.33	0.32	hypothetical protein, conserved
EAH_00035630	6	0.33	0.23	0.64	0.35	0.23	0.76	0.3	0.27	0.97	0.28	0.53	1.76	0.3	0.22	0.55	0.41	0.53	1.61	0.33	hypothetical protein, conserved
EAH_00034170	3	0.33	na	na	na	0.28	0.86	0.32	na	na	na	0.46	1.32	0.35	na	na	na	0.42	1.26	0.33	hypothetical protein, conserved
EAH_00033310	3	0.33	0.31	1.41	0.22	na	na	na	0.3	0.78	0.39	na	na	na	0.28	0.72	0.39	NaN	NaN	NaN	hypothetical protein, conserved
EAH_00033280	3	0.33	na	na	na	0.37	0.82	0.45	0.18	0.6	0.31	na	na	na	0.22	0.92	0.24	na	na	na	hypothetical protein, conserved
EAH_00032700	6	0.33	0.34	1.37	0.25	0.38	1.09	0.34	0.46	0.8	0.57	0.54	2.37	0.23	0.53	1.52	0.35	0.56	2.1	0.26	hypothetical protein, conserved
EAH_00032650	6	0.33	0.34	0.76	0.44	0.23	0.78	0.3	0.23	0.8	0.29	0.3	1.29	0.23	0.29	0.69	0.42	0.31	1.06	0.29	hypothetical protein, conserved
EAH_00031040	4	0.33	0.37	1.09	0.34	0.57	1.58	0.36	na	na	na	0.62	4.28	0.14	0.42	0.89	0.47	NaN	NaN	NaN	hypothetical protein, conserved
EAH_00030810	6	0.33	0.16	0.59	0.27	0.28	0.71	0.39	0.24	0.6	0.4	0.42	1.7	0.25	0.24	0.57	0.42	0.43	1.61	0.27	WD domain, G-beta repeat-containing protein, putative
EAH_00029290	4	0.33	0.36	0.85	0.42	0.26	0.81	0.32	0.28	1	0.28	NaN	NaN	NaN	0.19	0.61	0.31	NaN	NaN	NaN	hypothetical protein, conserved
EAH_00027570	4	0.33	0.36	1.32	0.27	0.42	1.24	0.34	na	na	na	na	na	na	0.45	1.43	0.32	0.51	1.3	0.39	hypothetical protein, conserved
EAH_00027140	3	0.33	na	na	na	na	na	na	0.45	1.04	0.44	0.48	1.8	0.27	na	na	na	0.43	1.57	0.27	MIZ zinc finger protein, putative
EAH_00027130	3	0.33	0.31	0.98	0.31	0.3	1.36	0.22	na	na	na	0.96	2.11	0.45	na	na	na	NaN	NaN	NaN	40S ribosomal protein S3, putative
EAH_00024270	4	0.33	0.35	0.98	0.36	na	na	na	0.37	1.11	0.33	na	na	na	0.35	0.95	0.37	0.52	1.88	0.28	hypothetical protein, conserved
EAH_00023910	4	0.33	na	na	na	0.19	0.68	0.28	0.37	0.97	0.38	0.41	1.35	0.31	na	na	na	0.42	1.13	0.37	hypothetical protein, conserved
EAH_00023830	4	0.33	0.22	0.63	0.34	0.24	0.63	0.38	0.18	0.67	0.27	na	na	na	0.18	0.55	0.32	na	na	na	hypothetical protein, conserved
EAH_00023120	6	0.33	0.58	3.52	0.17	0.5	1.06	0.47	0.56	1.54	0.37	0.68	1.92	0.36	0.54	1.73	0.31	0.63	2.14	0.3	hypothetical protein, conserved
EAH_00022970	4	0.33	0.55	1.78	0.31	0.34	1.21	0.28	na	na	na	na	na	na	0.68	1.47	0.46	0.37	1.36	0.27	cation-transporting ATPase, putative
EAH_00022780	6	0.33	0.21	0.62	0.34	0.25	0.74	0.34	0.23	0.55	0.41	0.52	1.83	0.28	0.21	0.64	0.33	0.51	1.88	0.27	hypothetical protein, conserved
EAH_00022230	3	0.33	0.34	2.01	0.17	0.38	0.86	0.45	na	na	na	na	na	na	0.36	0.94	0.38	na	na	na	hypothetical protein, conserved
EAH_00020860	6	0.33	0.23	0.81	0.29	0.23	0.77	0.3	0.21	0.72	0.29	0.46	1.55	0.29	0.27	0.61	0.44	0.5	1.45	0.35	myosin heavy chain, putative
EAH_00020550	3	0.33	0.31	1.69	0.18	na	na	na	na	na	na	0.59	1.75	0.34	na	na	na	0.73	1.57	0.46	hypothetical protein, conserved
EAH_00019730	4	0.33	0.24	0.97	0.25	0.31	0.82	0.38	0.28	0.92	0.31	na	na	na	0.38	1.01	0.38	na	na	na	hypothetical protein, conserved
EAH_00018670	4	0.33	0.45	1.23	0.37	0.37	1.12	0.33	0.42	1.2	0.35	na	na	na	0.42	1.45	0.29	na	na	na	hypothetical protein, conserved
EAH_00018500	6	0.33	0.23	0.63	0.37	0.2	0.54	0.36	0.22	0.67	0.32	0.44	1.54	0.28	0.2	0.5	0.39	0.4	1.48	0.27	hypothetical protein, conserved
EAH_00017930	3	0.33	0.23	0.79	0.3	na	na	na	na	na	na	0.33	0.82	0.41	0.28	0.99	0.28	na	na	na	hypothetical protein, conserved
EAH_00017700	4	0.33	0.24	0.8	0.3	0.36	0.98	0.37	0.33	0.95	0.35	na	na	na	0.24	0.83	0.29	na	na	na	Abhydrolase domain-containing protein, related
EAH_00016390	1	0.33	na	na	na	0.54	1.65	0.33	na	na	na	na	na	na	na	na	na	na	na	na	hypothetical protein, conserved
EAH_00016210	5	0.33	na	na	na	0.2	0.55	0.36	0.11	0.44	0.24	0.36	1.19	0.31	0.2	0.47	0.42	0.35	1.03	0.34	hypothetical protein, conserved
EAH_00016080	6	0.33	0.26	0.76	0.34	0.27	0.77	0.35	0.23	0.67	0.35	0.53	1.78	0.3	0.27	0.71	0.38	0.5	1.84	0.27	hypothetical protein, conserved
EAH_00015540	6	0.33	0.28	0.82	0.34	0.28	0.72	0.39	0.26	0.87	0.3	0.41	1.48	0.28	0.24	0.71	0.34	0.42	1.36	0.31	hypothetical protein, conserved
EAH_00014970	5	0.33	0.19	0.64	0.3	0.2	0.66	0.3	0.24	0.62	0.38	0.41	1.75	0.23	0.3	0.72	0.42	na	na	na	hypothetical protein, conserved
EAH_00014420	4	0.33	0.27	0.77	0.36	0.32	0.83	0.39	na	na	na	0.36	1.31	0.28	na	na	na	0.38	1.29	0.3	hypothetical protein, conserved
EAH_00013540	1	0.33	na	na	na	na	na	na	0.47	1.44	0.33	NaN	NaN	NaN	na	na	na	na	na	na	DnaJ domain-containing protein, putative
EAH_00013330	3	0.33	0.27	1.92	0.14	na	na	na	na	na	na	0.7	1.98	0.35	na	na	na	0.66	1.32	0.5	hypothetical protein, conserved
EAH_00012440	6	0.33	0.18	0.63	0.29	0.23	0.59	0.39	0.22	0.52	0.43	0.42	1.61	0.26	0.18	0.52	0.34	0.47	1.93	0.24	hypothetical protein, conserved
EAH_00011670	1	0.33	na	na	na	na	na	na	na	na	na	0.49	1.49	0.33	na	na	na	na	na	na	sag
EAH_00011330	2	0.33	0.25	1.11	0.23	0.28	0.65	0.43	na	na	na	na	na	na	na	na	na	na	na	na	hypothetical protein, conserved
EAH_00010990	4	0.33	na	na	na	0.38	1.01	0.38	na	na	na	0.71	2.2	0.32	0.35	0.99	0.35	0.64	2.26	0.28	hypothetical protein, conserved
EAH_00010890	3	0.33	na	na	na	0.37	1.06	0.35	0.36	1.3	0.28	na	na	na	0.43	1.16	0.37	NaN	NaN	NaN	hypothetical protein, conserved
EAH_00009830	6	0.33	0.22	0.85	0.26	0.27	0.86	0.32	0.27	0.83	0.32	0.47	1.26	0.38	0.32	1.12	0.29	0.41	1	0.41	hypothetical protein, conserved
EAH_00009760	4	0.33	0.31	0.95	0.32	na	na	na	0.32	1.05	0.3	na	na	na	0.46	1.07	0.43	0.45	1.75	0.26	PIK3R4 kinase-related protein (incomplete catalytic triad), putative
EAH_00008790	6	0.33	0.19	0.5	0.38	0.27	0.87	0.31	0.18	0.63	0.28	0.56	1.79	0.31	0.21	0.54	0.38	0.49	1.59	0.31	hypothetical protein, conserved
EAH_00008360	6	0.33	0.34	1.36	0.25	0.66	1.48	0.45	0.33	1.04	0.31	0.49	1.23	0.4	0.25	0.72	0.34	0.53	2.44	0.22	hypothetical protein, conserved
EAH_00006030	6	0.33	0.26	0.77	0.34	0.26	0.7	0.37	0.24	0.64	0.38	0.48	2.03	0.24	0.23	0.63	0.36	0.53	1.99	0.27	hypothetical protein, conserved
EAH_00002130	5	0.33	0.35	0.79	0.44	0.37	1.1	0.33	0.33	1.27	0.26	0.49	1.68	0.29	0.19	0.59	0.32	na	na	na	hypothetical protein, conserved
EAH_00063600	1	0.32	na	na	na	na	na	na	na	na	na	na	na	na	0.23	0.73	0.32	na	na	na	hypothetical protein, conserved
EAH_00061400	1	0.32	na	na	na	na	na	na	0.37	1.18	0.32	na	na	na	na	na	na	NaN	NaN	NaN	ABC transporter, putative
EAH_00060660	2	0.32	0.51	1.04	0.49	na	na	na	na	na	na	0.41	2.65	0.15	na	na	na	NaN	NaN	NaN	hypothetical protein, conserved
EAH_00060580	4	0.32	0.19	0.96	0.19	0.23	1.21	0.19	na	na	na	0.92	1.44	0.64	0.2	0.79	0.26	na	na	na	hypothetical protein, conserved
EAH_00059640	4	0.32	0.59	1.67	0.35	na	na	na	na	na	na	0.48	1.6	0.3	0.43	1.42	0.3	0.54	1.71	0.32	cation channel family domain-containing protein, putative
EAH_00059310	3	0.32	0.48	1.76	0.27	0.27	0.73	0.36	na	na	na	na	na	na	0.42	1.25	0.33	na	na	na	hypothetical protein, conserved
EAH_00058660	5	0.32	1.09	2.24	0.49	na	na	na	0.22	0.9	0.25	0.85	2.2	0.39	0.25	0.97	0.25	0.31	1.31	0.24	hypothetical protein, conserved
EAH_00057000	5	0.32	0.4	1.45	0.28	0.29	1.47	0.2	na	na	na	1.06	1.92	0.55	0.75	1.99	0.38	0.36	1.71	0.21	hypothetical protein, conserved
EAH_00056520	3	0.32	0.28	2.12	0.13	0.44	1.47	0.3	na	na	na	0.93	1.77	0.53	na	na	na	na	na	na	hypothetical protein, conserved
EAH_00054650	3	0.32	0.88	2.11	0.42	na	na	na	0.24	1.12	0.22	NaN	NaN	NaN	0.48	1.46	0.33	na	na	na	hypothetical protein, conserved
EAH_00053860	6	0.32	0.51	1.79	0.29	0.37	1	0.37	0.55	1.57	0.35	0.53	2.87	0.19	0.4	1.05	0.38	0.64	1.91	0.33	hypothetical protein, conserved
EAH_00052540	1	0.32	na	na	na	na	na	na	0.45	1.41	0.32	na	na	na	na	na	na	na	na	na	hypothetical protein, conserved
EAH_00051990	3	0.32	na	na	na	0.43	1.9	0.23	na	na	na	0.6	1.61	0.37	na	na	na	0.57	1.63	0.35	hypothetical protein, conserved
EAH_00051620	5	0.32	0.41	1.3	0.32	0.36	1.09	0.33	NaN	NaN	NaN	0.44	0.98	0.45	0.36	1.4	0.26	0.48	1.96	0.25	hypothetical protein, conserved
EAH_00051420	4	0.32	0.36	1.21	0.29	0.37	1.25	0.3	0.21	0.87	0.24	na	na	na	0.33	0.72	0.46	na	na	na	hypothetical protein, conserved
EAH_00050910	3	0.32	NaN	NaN	NaN	0.28	0.75	0.37	0.38	1.26	0.3	NaN	NaN	NaN	0.34	1.23	0.28	NaN	NaN	NaN	NMD3 protein, putative
EAH_00050640	1	0.32	na	na	na	na	na	na	0.43	1.33	0.32	NaN	NaN	NaN	na	na	na	NaN	NaN	NaN	hypothetical protein, conserved
EAH_00047160	2	0.32	na	na	na	0.37	1.05	0.36	0.25	0.9	0.28	na	na	na	na	na	na	na	na	na	hypothetical protein, conserved
EAH_00044390	5	0.32	0.54	1.62	0.33	0.32	0.84	0.38	0.49	1.6	0.31	0.68	2.87	0.24	0.32	0.88	0.37	NaN	NaN	NaN	hypothetical protein, conserved
EAH_00043450	5	0.32	na	na	na	0.34	0.78	0.43	0.39	1.2	0.33	0.58	2.21	0.26	0.32	1.4	0.23	0.57	1.59	0.36	hypothetical protein, conserved
EAH_00042820	3	0.32	0.18	0.76	0.24	0.19	0.82	0.23	na	na	na	na	na	na	0.35	0.71	0.49	na	na	na	thiamin pyrophosphokinase, putative
EAH_00041010	4	0.32	0.38	0.92	0.41	0.38	1.01	0.37	0.23	1.03	0.23	na	na	na	na	na	na	0.62	2.39	0.26	hypothetical protein, conserved
EAH_00040670	6	0.32	0.2	0.79	0.26	0.39	0.96	0.41	0.27	1.34	0.21	0.84	1.35	0.62	0.09	0.8	0.11	0.53	1.62	0.33	hypothetical protein, conserved
EAH_00038800	1	0.32	na	na	na	na	na	na	0.3	0.95	0.32	na	na	na	na	na	na	na	na	na	NEK kinase, putative
EAH_00038210	6	0.32	0.42	1.03	0.41	0.43	1.4	0.31	0.33	1.11	0.3	0.46	1.71	0.27	0.35	1.09	0.32	0.49	1.56	0.31	hypothetical protein, conserved
EAH_00035310	1	0.32	na	na	na	na	na	na	na	na	na	na	na	na	0.41	1.28	0.32	na	na	na	hypothetical protein, conserved
EAH_00035070	5	0.32	0.5	1.28	0.39	0.35	1.04	0.34	na	na	na	0.53	2.01	0.26	0.39	1.13	0.34	0.54	2.13	0.25	hypothetical protein, conserved
EAH_00034980	1	0.32	na	na	na	na	na	na	0.21	0.65	0.32	na	na	na	na	na	na	na	na	na	leucine rich repeat protein, putative
EAH_00034770	3	0.32	0.39	1.22	0.32	na	na	na	0.33	0.82	0.4	na	na	na	0.47	1.94	0.24	na	na	na	hypothetical protein, conserved
EAH_00032580	6	0.32	0.25	0.84	0.3	0.27	0.76	0.36	0.29	0.69	0.43	0.45	1.66	0.27	0.26	0.76	0.34	0.44	1.85	0.24	hypothetical protein, conserved
EAH_00030500	4	0.32	0.17	1.19	0.15	na	na	na	na	na	na	0.4	0.74	0.54	0.25	1.06	0.23	0.32	0.86	0.37	hypothetical protein, conserved
EAH_00029990	2	0.32	na	na	na	na	na	na	0.19	0.63	0.3	na	na	na	na	na	na	0.48	1.36	0.35	hypothetical protein, conserved
EAH_00027700	4	0.32	0.59	1.89	0.31	0.6	1.48	0.41	0.53	2.66	0.2	na	na	na	0.58	1.61	0.36	na	na	na	hypothetical protein, conserved
EAH_00027300	4	0.32	0.29	0.93	0.31	na	na	na	0.3	1.09	0.27	0.52	1.34	0.39	na	na	na	0.49	1.58	0.31	hypothetical protein, conserved
EAH_00026850	3	0.32	0.3	0.86	0.35	0.18	0.85	0.21	0.18	0.45	0.4	na	na	na	na	na	na	na	na	na	hypothetical protein, conserved
EAH_00025500	4	0.32	na	na	na	0.22	1.06	0.21	0.33	0.85	0.39	0.48	1.26	0.38	0.35	1.13	0.31	na	na	na	ABC1 domain-containing protein, putative
EAH_00024720	5	0.32	0.31	1.07	0.29	0.26	0.7	0.37	na	na	na	0.45	1.47	0.31	0.36	1.11	0.32	0.44	1.42	0.31	hypothetical protein, conserved
EAH_00022620	6	0.32	0.28	0.72	0.39	0.27	0.7	0.38	0.22	0.65	0.33	0.42	1.86	0.23	0.24	0.66	0.36	0.43	2.1	0.2	hypothetical protein, conserved
EAH_00019120	2	0.32	na	na	na	0.34	1.14	0.3	na	na	na	NaN	NaN	NaN	0.47	1.36	0.35	NaN	NaN	NaN	hypothetical protein, conserved
EAH_00018540	6	0.32	0.17	0.51	0.33	0.22	0.68	0.32	0.16	0.47	0.34	0.45	1.66	0.27	0.17	0.52	0.32	0.41	1.28	0.32	Dpy-30 motif containing protein, putative
EAH_00018200	3	0.32	0.39	1	0.39	na	na	na	0.27	1.57	0.17	na	na	na	0.31	0.78	0.4	na	na	na	hypothetical protein, conserved
EAH_00015890	4	0.32	0.19	0.8	0.24	0.78	1.53	0.51	0.3	1.04	0.29	0.3	1.33	0.23	na	na	na	na	na	na	hypothetical protein, conserved
EAH_00014850	2	0.32	0.35	1	0.34	na	na	na	na	na	na	na	na	na	0.27	0.9	0.3	na	na	na	mannose-1-phosphate guanylyltransferase, putative
EAH_00013790	3	0.32	0.3	1.02	0.3	0.29	0.88	0.33	0.3	0.89	0.34	na	na	na	na	na	na	na	na	na	hypothetical protein, conserved
EAH_00013060	4	0.32	0.33	1.89	0.17	0.36	1.15	0.31	0.36	1.11	0.33	NaN	NaN	NaN	0.45	1	0.45	NaN	NaN	NaN	hypothetical protein, conserved
EAH_00011660	2	0.32	0.22	0.83	0.26	na	na	na	na	na	na	na	na	na	na	na	na	0.48	1.25	0.38	sag
EAH_00010370	1	0.32	0.28	0.87	0.32	na	na	na	na	na	na	na	na	na	na	na	na	na	na	na	hypothetical protein, conserved
EAH_00010150	3	0.32	0.09	2.14	0.04	1.31	1.56	0.84	0.11	1.83	0.06	NaN	NaN	NaN	na	na	na	NaN	NaN	NaN	hypothetical protein, conserved
EAH_00010060	1	0.32	0.21	0.64	0.32	na	na	na	na	na	na	na	na	na	na	na	na	na	na	na	WD domain, G-beta repeat-containing protein, putative
EAH_00009240	1	0.32	na	na	na	na	na	na	na	na	na	na	na	na	na	na	na	0.66	2.04	0.32	hypothetical protein, conserved
EAH_00008610	3	0.32	na	na	na	0.27	0.79	0.34	na	na	na	0.46	1.58	0.29	na	na	na	0.47	1.42	0.33	hypothetical protein, conserved
EAH_00008380	6	0.32	0.29	0.95	0.3	0.39	0.88	0.44	0.25	0.9	0.28	0.49	1.4	0.35	0.28	0.96	0.29	0.41	1.39	0.29	hypothetical protein, conserved
EAH_00007330	4	0.32	0.62	1.61	0.39	0.36	1.23	0.3	0.53	2.72	0.2	NaN	NaN	NaN	0.61	1.5	0.41	NaN	NaN	NaN	hypothetical protein, conserved
EAH_00004720	6	0.32	0.19	0.55	0.35	0.22	0.57	0.38	0.17	0.48	0.35	0.38	1.37	0.28	0.16	0.51	0.31	0.37	1.33	0.28	Proteophosphoglycan 5, related
EAH_00003280	3	0.32	0.43	1.29	0.34	0.24	0.69	0.35	na	na	na	NaN	NaN	NaN	0.2	0.73	0.28	NaN	NaN	NaN	hypothetical protein, conserved
EAH_00003080	6	0.32	0.19	0.54	0.36	0.22	0.61	0.36	0.19	0.52	0.37	0.4	1.62	0.25	0.17	0.57	0.31	0.4	1.53	0.26	hypothetical protein, conserved
EAH_00002020	6	0.32	0.24	0.57	0.43	0.24	0.69	0.34	0.21	0.57	0.36	0.36	1.66	0.22	0.21	0.55	0.38	0.34	1.68	0.2	DEAD/DEAH box helicase, putative
EAH_00001240	6	0.32	0.24	0.7	0.34	0.37	0.88	0.42	0.21	0.52	0.4	0.37	1.87	0.2	0.22	0.61	0.36	0.36	1.71	0.21	hypothetical protein, conserved
EAH_00000090	6	0.32	0.3	0.76	0.39	0.19	0.65	0.29	0.22	0.5	0.43	0.45	2.56	0.17	0.25	0.65	0.39	0.44	1.78	0.25	Microneme protein etmic-2/7h, related
EAH_00065880	2	0.31	0.52	2.04	0.25	0.47	1.3	0.36	na	na	na	NaN	NaN	NaN	na	na	na	NaN	NaN	NaN	hypothetical protein, conserved
EAH_00064770	3	0.31	0.24	0.72	0.33	0.16	0.42	0.37	0.11	0.5	0.22	na	na	na	na	na	na	na	na	na	hypothetical protein, conserved
EAH_00063220	6	0.31	0.22	0.91	0.24	0.26	0.91	0.28	0.24	0.61	0.4	0.44	1.81	0.24	0.29	0.7	0.41	0.44	1.48	0.3	hypothetical protein, conserved
EAH_00061520	3	0.31	0.37	1.29	0.29	0.32	1.07	0.3	na	na	na	NaN	NaN	NaN	na	na	na	0.48	1.38	0.34	hypothetical protein, conserved
EAH_00059900	2	0.31	na	na	na	na	na	na	0.45	1.48	0.31	na	na	na	0.34	1.1	0.31	na	na	na	hypothetical protein, conserved
EAH_00056350	4	0.31	0.32	1.37	0.23	0.38	0.84	0.45	na	na	na	0.67	3.19	0.21	0.44	1.28	0.34	NaN	NaN	NaN	hypothetical protein, conserved
EAH_00054450	3	0.31	0.64	1.32	0.48	na	na	na	na	na	na	0.31	1.89	0.16	0.38	1.42	0.27	na	na	na	DnaJ domain-containing protein, putative
EAH_00053850	5	0.31	na	na	na	0.31	0.92	0.34	0.44	0.85	0.52	0.52	1.97	0.27	0.23	1.36	0.17	0.57	2.17	0.26	hypothetical protein, conserved
EAH_00053790	6	0.31	0.43	2.33	0.18	0.38	1.5	0.25	0.32	0.84	0.38	0.5	1.6	0.32	0.4	1.06	0.38	0.54	1.62	0.34	alpha-galactosidase A, putative
EAH_00053660	6	0.31	0.85	4.54	0.19	0.25	1.87	0.13	1.1	2.1	0.52	0.86	1.32	0.65	0.29	1.71	0.17	0.95	4.23	0.22	hypothetical protein, conserved
EAH_00051410	6	0.31	0.35	0.92	0.37	0.32	1.58	0.21	0.38	1.44	0.26	0.65	2.01	0.32	0.45	1.38	0.33	0.68	1.79	0.38	hypothetical protein, conserved
EAH_00050200	2	0.31	NaN	NaN	NaN	na	na	na	na	na	na	0.34	2.42	0.14	0.86	1.76	0.49	NaN	NaN	NaN	hypothetical protein, conserved
EAH_00049570	3	0.31	0.52	1.91	0.27	0.58	1.87	0.31	0.37	1.01	0.36	na	na	na	na	na	na	na	na	na	indole-3-glycerol phosphate synthase domain containing protein, putative
EAH_00049380	4	0.31	0.28	0.68	0.42	na	na	na	0.19	1.85	0.1	0.5	1.64	0.31	na	na	na	0.5	1.24	0.41	hypothetical protein, conserved
EAH_00049300	3	0.31	0.27	1.08	0.25	0.41	0.99	0.42	0.32	1.13	0.28	na	na	na	na	na	na	na	na	na	hypothetical protein, conserved
EAH_00045940	4	0.31	0.23	0.64	0.36	0.14	0.56	0.25	0.76	2.73	0.28	na	na	na	0.22	0.6	0.36	na	na	na	hypothetical protein, conserved
EAH_00045820	5	0.31	0.21	0.84	0.25	0.28	0.75	0.38	0.28	1	0.28	NaN	NaN	NaN	0.24	0.82	0.3	0.45	1.4	0.32	hypothetical protein, conserved
EAH_00045530	2	0.31	1.19	2.04	0.58	0.19	4.05	0.05	na	na	na	NaN	NaN	NaN	na	na	na	na	na	na	hypothetical protein, conserved
EAH_00045470	2	0.31	na	na	na	0.66	1.47	0.45	na	na	na	0.49	2.83	0.17	na	na	na	na	na	na	hypothetical protein, conserved
EAH_00044960	4	0.31	0.24	1.94	0.12	na	na	na	na	na	na	0.28	1.41	0.2	0.98	1.29	0.76	0.26	1.54	0.17	hypothetical protein, conserved
EAH_00043830	4	0.31	0.3	1.05	0.29	0.34	1.12	0.31	0.23	0.75	0.3	na	na	na	0.63	1.74	0.36	na	na	na	hypothetical protein, conserved
EAH_00042750	3	0.31	na	na	na	na	na	na	0.21	0.57	0.37	na	na	na	0.16	1.11	0.14	0.89	2.14	0.42	hypothetical protein, conserved
EAH_00041040	3	0.31	na	na	na	na	na	na	na	na	na	0.53	2.72	0.19	0.45	1.96	0.23	0.97	1.96	0.49	hypothetical protein, conserved
EAH_00041000	6	0.31	0.35	1.06	0.33	0.28	0.99	0.29	0.22	0.74	0.3	0.47	1.41	0.33	0.37	0.89	0.42	0.35	1.8	0.2	hypothetical protein, conserved
EAH_00040600	3	0.31	na	na	na	0.34	1.07	0.31	na	na	na	0.42	1.41	0.3	0.39	1.22	0.32	na	na	na	hypothetical protein, conserved
EAH_00039050	3	0.31	0.25	1.15	0.22	0.26	0.96	0.27	na	na	na	na	na	na	0.34	0.77	0.44	na	na	na	hypothetical protein, conserved
EAH_00038520	4	0.31	0.41	2.27	0.18	0.34	1.02	0.34	0.35	0.9	0.39	na	na	na	0.31	0.91	0.33	na	na	na	hypothetical protein, conserved
EAH_00037510	3	0.31	0.64	3.58	0.18	na	na	na	na	na	na	0.62	1.81	0.34	na	na	na	0.62	1.46	0.42	hypothetical protein, conserved
EAH_00037260	6	0.31	0.24	0.93	0.26	0.39	1.19	0.33	0.25	0.95	0.26	0.46	1.42	0.33	0.26	0.93	0.28	0.58	1.54	0.38	DNA polymerase I, putative
EAH_00037080	3	0.31	na	na	na	0.46	1.34	0.34	0.66	2.24	0.29	na	na	na	0.47	1.71	0.28	na	na	na	hypothetical protein, conserved
EAH_00037000	4	0.31	0.28	1.03	0.27	na	na	na	0.27	0.84	0.32	na	na	na	0.3	1.3	0.23	0.4	0.91	0.44	hypothetical protein, conserved
EAH_00035330	2	0.31	0.42	1.13	0.37	na	na	na	na	na	na	na	na	na	0.39	1.59	0.25	na	na	na	hypothetical protein, conserved
EAH_00035220	3	0.31	0.27	1.64	0.16	na	na	na	na	na	na	0.49	1.46	0.34	na	na	na	0.67	1.56	0.43	hypothetical protein, conserved
EAH_00034240	4	0.31	0.4	1.14	0.35	0.43	2.07	0.21	NaN	NaN	NaN	0.66	1.46	0.45	0.54	2.36	0.23	na	na	na	sodium-dependent transporter, putative
EAH_00030480	2	0.31	na	na	na	NaN	NaN	NaN	na	na	na	0.55	2.15	0.26	na	na	na	0.58	1.6	0.36	endonuclease/exonuclease/phosphatase domain-containing protein, putative
EAH_00028630	4	0.31	0.29	0.97	0.3	0.3	0.93	0.33	0.28	0.81	0.34	NaN	NaN	NaN	0.25	0.9	0.28	NaN	NaN	NaN	hypothetical protein, conserved
EAH_00027030	5	0.31	0.34	0.91	0.37	na	na	na	0.2	0.8	0.25	0.58	1.61	0.36	0.22	0.72	0.3	0.55	2	0.28	hypothetical protein, conserved
EAH_00026500	6	0.31	0.26	0.75	0.35	0.32	0.95	0.34	0.26	0.93	0.28	0.32	1.13	0.28	0.26	0.76	0.34	0.27	1.08	0.25	hypothetical protein, conserved
EAH_00025360	5	0.31	na	na	na	0.32	0.94	0.34	0.56	1.53	0.37	0.38	0.97	0.39	0.39	1.56	0.25	0.23	1.08	0.21	hypothetical protein, conserved
EAH_00024680	5	0.31	0.24	0.83	0.29	0.28	0.77	0.36	0.29	0.64	0.46	NaN	NaN	NaN	0.26	0.81	0.32	0.58	4.45	0.13	hypothetical protein, conserved
EAH_00023160	6	0.31	0.21	0.63	0.34	0.23	0.55	0.41	0.2	0.93	0.22	0.3	1.06	0.29	0.26	0.76	0.34	0.3	1.2	0.25	hypothetical protein, conserved
EAH_00022960	5	0.31	0.37	1.02	0.36	0.32	0.9	0.35	na	na	na	0.39	2.09	0.19	0.39	0.98	0.4	0.34	1.38	0.24	hypothetical protein, conserved
EAH_00022790	6	0.31	0.32	0.98	0.33	0.3	0.74	0.4	0.33	0.79	0.42	0.42	1.8	0.23	0.23	0.87	0.26	0.37	1.65	0.23	hypothetical protein, conserved
EAH_00022420	4	0.31	0.74	1.02	0.72	na	na	na	na	na	na	0.26	4.67	0.06	0.41	1.29	0.31	0.29	1.87	0.16	hypothetical protein, conserved
EAH_00022270	5	0.31	0.32	0.95	0.34	0.3	0.85	0.36	0.23	0.82	0.29	0.53	2.43	0.22	0.26	0.75	0.35	NaN	NaN	NaN	hypothetical protein, conserved
EAH_00021850	4	0.31	0.33	0.82	0.4	na	na	na	na	na	na	0.53	1.71	0.31	0.24	1.15	0.21	0.56	1.78	0.31	hypothetical protein, conserved
EAH_00019900	4	0.31	0.52	0.9	0.58	na	na	na	0.2	1.12	0.18	0.41	1.34	0.3	na	na	na	0.2	1.01	0.2	hypothetical protein, conserved
EAH_00019770	6	0.31	0.3	0.74	0.41	0.39	1.15	0.34	0.32	1.43	0.22	0.54	1.71	0.32	0.21	0.7	0.3	0.5	2.06	0.24	hypothetical protein, conserved
EAH_00018750	4	0.31	0.28	0.82	0.34	0.23	0.83	0.28	0.23	0.62	0.37	NaN	NaN	NaN	0.16	0.64	0.25	NaN	NaN	NaN	hypothetical protein, conserved
EAH_00017350	6	0.31	0.26	0.73	0.36	0.28	0.77	0.36	0.27	0.9	0.29	0.36	1.38	0.26	0.24	0.69	0.36	0.36	1.54	0.24	hypothetical protein, conserved
EAH_00017230	4	0.31	0.38	0.85	0.45	0.3	0.7	0.43	na	na	na	0.41	3.06	0.13	na	na	na	0.32	1.32	0.24	hypothetical protein, conserved
EAH_00016880	3	0.31	0.39	1.13	0.35	na	na	na	0.36	1.09	0.32	0.47	1.91	0.25	na	na	na	na	na	na	glycogenin-1, putative
EAH_00016870	2	0.31	0.96	2.03	0.47	na	na	na	na	na	na	0.36	2.26	0.16	na	na	na	na	na	na	corA-like Mg2+ transporter domain-containing protein, putative
EAH_00016510	3	0.31	0.34	0.93	0.36	na	na	na	0.25	0.98	0.26	na	na	na	0.28	0.94	0.29	na	na	na	hypothetical protein, conserved
EAH_00016050	6	0.31	0.22	0.58	0.37	0.18	0.71	0.26	0.21	0.51	0.42	0.38	1.8	0.21	0.22	0.58	0.37	0.38	1.82	0.21	hypothetical protein, conserved
EAH_00015990	6	0.31	0.24	0.77	0.3	0.24	0.7	0.34	0.24	0.79	0.3	0.47	1.55	0.3	0.23	0.75	0.31	0.48	1.67	0.29	hypothetical protein, conserved
EAH_00015880	3	0.31	0.19	0.69	0.28	na	na	na	0.18	0.59	0.31	na	na	na	0.2	0.63	0.32	na	na	na	AGAP005082-PA, related, related
EAH_00015370	3	0.31	0.26	0.82	0.32	na	na	na	na	na	na	0.64	2.26	0.28	na	na	na	0.62	1.81	0.34	hypothetical protein, conserved
EAH_00013710	1	0.31	0.44	1.42	0.31	na	na	na	NaN	NaN	NaN	NaN	NaN	NaN	NaN	NaN	NaN	NaN	NaN	NaN	hypothetical protein, conserved
EAH_00013220	6	0.31	0.2	0.79	0.26	0.24	0.89	0.27	0.23	0.69	0.33	0.47	1.59	0.29	0.27	0.61	0.44	0.48	1.76	0.27	hypothetical protein, conserved
EAH_00012990	2	0.31	0.53	1	0.54	na	na	na	0.07	0.94	0.08	na	na	na	na	na	na	na	na	na	hypothetical protein, conserved
EAH_00012810	4	0.31	0.18	0.65	0.28	0.2	0.65	0.31	0.14	0.45	0.31	na	na	na	0.16	0.45	0.35	na	na	na	hypothetical protein, conserved
EAH_00012340	2	0.31	na	na	na	0.31	1.01	0.31	na	na	na	na	na	na	1.18	3.75	0.31	na	na	na	hypothetical protein, conserved
EAH_00012270	5	0.31	na	na	na	0.35	0.91	0.38	0.39	1.11	0.35	0.52	2.18	0.24	0.29	0.91	0.32	0.54	2.08	0.26	hypothetical protein, conserved
EAH_00012240	3	0.31	0.26	0.88	0.29	0.29	1.01	0.29	0.36	1.06	0.34	na	na	na	na	na	na	na	na	na	hypothetical protein, conserved
EAH_00012040	6	0.31	0.24	0.82	0.3	0.23	0.83	0.28	0.18	0.76	0.23	0.46	1.26	0.36	0.23	0.65	0.36	0.41	1.31	0.31	hypothetical protein, conserved
EAH_00011680	4	0.31	0.24	0.81	0.29	0.21	0.78	0.27	0.23	0.75	0.3	na	na	na	0.22	0.6	0.37	na	na	na	sag
EAH_00011450	2	0.31	na	na	na	0.24	0.78	0.31	0.23	0.74	0.32	na	na	na	na	na	na	na	na	na	hypothetical protein, conserved
EAH_00011320	5	0.31	na	na	na	0.53	1.56	0.34	0.4	1.07	0.38	0.43	1.43	0.3	0.39	1.19	0.33	0.4	2.01	0.2	DNA ligase, putative
EAH_00011170	4	0.31	0.55	1.18	0.46	0.25	1.04	0.24	na	na	na	na	na	na	0.35	1.19	0.29	0.33	1.32	0.25	Possible conserved eukaryotic alpha beta hydrolase, related
EAH_00011140	6	0.31	0.28	0.87	0.32	0.24	0.78	0.31	0.21	0.71	0.29	0.41	1.16	0.36	0.2	0.74	0.27	0.4	1.19	0.34	hypothetical protein, conserved
EAH_00011120	4	0.31	0.21	0.94	0.23	0.2	0.83	0.25	0.36	0.61	0.59	na	na	na	0.18	0.99	0.18	na	na	na	hypothetical protein, conserved
EAH_00008820	4	0.31	0.13	0.35	0.37	0.12	0.68	0.18	0.2	0.58	0.35	na	na	na	0.24	0.7	0.34	na	na	na	glycosyl transferase, group 1 domain containing protein, putative
EAH_00007910	3	0.31	na	na	na	na	na	na	0.46	1.19	0.39	0.38	1.58	0.24	0.24	0.82	0.29	NaN	NaN	NaN	hypothetical protein, conserved
EAH_00007900	6	0.31	0.21	0.7	0.29	0.28	0.79	0.35	0.27	0.65	0.42	0.39	1.63	0.24	0.2	0.62	0.33	0.39	1.87	0.21	hypothetical protein, conserved
EAH_00007880	3	0.31	0.17	0.63	0.27	na	na	na	0.17	0.59	0.28	0.46	1.22	0.38	na	na	na	na	na	na	hypothetical protein, conserved
EAH_00007060	6	0.31	0.29	0.96	0.3	0.26	0.77	0.33	0.26	0.86	0.31	0.51	1.62	0.31	0.27	0.73	0.37	0.38	1.56	0.25	hypothetical protein, conserved
EAH_00006720	4	0.31	0.2	0.64	0.32	na	na	na	na	na	na	0.45	1.5	0.3	0.17	0.58	0.3	0.47	1.48	0.32	hypothetical protein, conserved
EAH_00005800	3	0.31	na	na	na	na	na	na	0.12	0.94	0.13	0.74	2.44	0.3	na	na	na	0.88	1.76	0.5	ulp1 protease family, C-terminal catalytic domain-containing protein, putative
EAH_00005110	6	0.31	0.19	0.59	0.33	0.23	0.65	0.36	0.15	0.44	0.33	0.42	1.36	0.31	0.15	0.6	0.25	0.41	1.5	0.27	hypothetical protein, conserved
EAH_00002980	2	0.31	0.22	0.67	0.33	na	na	na	0.17	0.58	0.29	na	na	na	na	na	na	na	na	na	WD domain-containing protein, putative
EAH_00002250	3	0.31	0.36	1.15	0.32	0.3	1.38	0.22	0.47	1.17	0.4	NaN	NaN	NaN	na	na	na	NaN	NaN	NaN	hypothetical protein, conserved
EAH_00001720	5	0.31	na	na	na	0.33	0.81	0.41	0.23	0.59	0.39	0.31	1.49	0.21	0.18	0.53	0.33	0.33	1.47	0.23	hypothetical protein, conserved
EAH_00001650	6	0.31	0.26	0.5	0.52	0.22	0.65	0.33	0.14	0.54	0.27	0.32	1.36	0.23	0.17	0.56	0.3	0.32	1.42	0.22	hypothetical protein, conserved
EAH_00000520	5	0.31	0.23	0.77	0.3	0.23	0.64	0.36	0.42	1.15	0.37	0.38	1.59	0.24	na	na	na	0.41	1.38	0.3	RNA helicase, putative
EAH_00066830	1	0.3	na	na	na	na	na	na	0.28	0.94	0.3	na	na	na	na	na	na	na	na	na	hypothetical protein, conserved
EAH_00065890	3	0.3	0.77	2.28	0.34	0.46	2.82	0.16	na	na	na	na	na	na	0.61	1.49	0.41	na	na	na	hypothetical protein, conserved
EAH_00063730	3	0.3	NaN	NaN	NaN	0.6	1.79	0.33	na	na	na	na	na	na	0.42	1.08	0.39	0.46	2.85	0.16	hypothetical protein, conserved
EAH_00059760	2	0.3	na	na	na	0.51	2.06	0.25	0.44	1.23	0.36	NaN	NaN	NaN	na	na	na	na	na	na	hypothetical protein, conserved
EAH_00059000	1	0.3	na	na	na	0.35	1.18	0.3	na	na	na	NaN	NaN	NaN	na	na	na	na	na	na	hypothetical protein, conserved
EAH_00058840	6	0.3	0.22	0.83	0.26	0.32	0.99	0.32	0.25	0.66	0.38	0.26	1.37	0.19	0.26	0.76	0.34	0.4	1.43	0.28	hypothetical protein, conserved
EAH_00058050	4	0.3	0.42	1.47	0.29	na	na	na	0.5	1.82	0.27	0.55	3.84	0.14	0.45	0.94	0.48	NaN	NaN	NaN	hypothetical protein, conserved
EAH_00057750	6	0.3	0.26	1.46	0.18	0.35	0.95	0.37	0.47	1.02	0.46	0.33	1.52	0.22	0.31	0.8	0.39	0.38	1.87	0.2	hypothetical protein, conserved
EAH_00057480	2	0.3	0.33	1.05	0.31	na	na	na	0.36	1.28	0.28	na	na	na	na	na	na	na	na	na	hypothetical protein, conserved
EAH_00056950	2	0.3	na	na	na	na	na	na	na	na	na	0.45	1.29	0.35	na	na	na	0.46	1.78	0.26	hypothetical protein, conserved
EAH_00056700	6	0.3	0.32	1.58	0.2	0.3	1.19	0.25	0.31	1.27	0.25	0.53	1.17	0.45	0.25	1.29	0.19	0.54	1.23	0.44	hypothetical protein, conserved
EAH_00053150	1	0.3	0.36	1.2	0.3	na	na	na	na	na	na	na	na	na	na	na	na	na	na	na	hypothetical protein, conserved
EAH_00052680	5	0.3	0.29	1.05	0.27	0.27	0.74	0.37	0.18	0.6	0.31	0.34	2.05	0.16	0.21	0.51	0.4	na	na	na	hypothetical protein, conserved
EAH_00049290	5	0.3	0.47	2.17	0.22	0.33	1.92	0.17	0.53	1.66	0.32	0.62	1.7	0.37	na	na	na	0.67	1.57	0.42	hypothetical protein, conserved
EAH_00049100	5	0.3	0.24	0.82	0.3	0.21	0.93	0.22	0.38	0.81	0.46	0.47	1.92	0.25	na	na	na	0.48	1.79	0.27	hypothetical protein, conserved
EAH_00047330	2	0.3	0.5	1.01	0.49	na	na	na	NaN	NaN	NaN	0.29	2.61	0.11	na	na	na	NaN	NaN	NaN	hypothetical protein, conserved
EAH_00047210	5	0.3	0.17	0.6	0.28	0.2	0.57	0.34	na	na	na	0.38	1.31	0.29	0.18	0.64	0.28	0.38	1.33	0.29	hypothetical protein, conserved
EAH_00046420	2	0.3	0.9	1.91	0.47	na	na	na	na	na	na	0.41	3.15	0.13	na	na	na	NaN	NaN	NaN	hypothetical protein, conserved
EAH_00046070	6	0.3	0.28	1.59	0.18	0.32	2.85	0.11	0.24	0.87	0.28	0.76	1.85	0.41	0.71	1.62	0.44	0.43	1.16	0.37	Vacuolar protein sorting-associating protein 4A, related
EAH_00043750	2	0.3	0.42	1.09	0.38	na	na	na	0.28	1.34	0.21	na	na	na	na	na	na	na	na	na	hypothetical protein, conserved
EAH_00042960	3	0.3	0.36	1.18	0.3	0.31	1.17	0.26	na	na	na	na	na	na	0.43	1.32	0.32	na	na	na	hypothetical protein, conserved
EAH_00041990	5	0.3	0.19	0.62	0.31	0.24	0.69	0.35	na	na	na	0.4	1.52	0.27	0.22	0.62	0.35	0.36	1.44	0.25	hypothetical protein, conserved
EAH_00039730	3	0.3	0.39	1.4	0.28	0.47	1.55	0.31	0.32	1.05	0.3	na	na	na	na	na	na	na	na	na	hypothetical protein, conserved
EAH_00038990	4	0.3	0.54	1.91	0.28	na	na	na	na	na	na	0.39	1.45	0.27	0.59	1.61	0.37	0.58	2.18	0.27	hypothetical protein, conserved
EAH_00038950	5	0.3	0.41	1.1	0.37	0.4	1.19	0.34	na	na	na	0.53	2.42	0.22	0.53	1.33	0.4	0.61	3.41	0.18	hypothetical protein, conserved
EAH_00038890	3	0.3	0.42	1.42	0.3	0.37	1.21	0.31	na	na	na	na	na	na	0.33	1.14	0.29	na	na	na	hypothetical protein, conserved
EAH_00038220	4	0.3	na	na	na	0.31	1.12	0.28	NaN	NaN	NaN	0.45	1.83	0.25	0.41	1.15	0.36	0.67	2.1	0.32	hypothetical protein, conserved
EAH_00038020	5	0.3	0.18	1.29	0.14	0.24	0.97	0.25	0.26	0.81	0.32	na	na	na	0.21	0.74	0.29	0.56	1.12	0.5	hypothetical protein, conserved
EAH_00036670	4	0.3	0.34	1.12	0.3	0.42	1.44	0.3	na	na	na	na	na	na	0.43	1.17	0.36	0.42	1.82	0.23	hypothetical protein, conserved
EAH_00035290	4	0.3	na	na	na	0.57	1.46	0.39	0.37	1.29	0.29	0.43	1.59	0.27	na	na	na	0.44	1.86	0.23	hypothetical protein, conserved
EAH_00035180	3	0.3	0.41	2	0.21	0.44	1.1	0.4	0.42	1.49	0.28	na	na	na	na	na	na	na	na	na	hypothetical protein, conserved
EAH_00034730	5	0.3	0.37	0.76	0.48	0.39	1.29	0.3	0.17	1.1	0.16	na	na	na	0.26	1.06	0.25	0.39	1.34	0.29	hypothetical protein, conserved
EAH_00031650	1	0.3	na	na	na	na	na	na	0.48	1.57	0.3	na	na	na	na	na	na	na	na	na	hypothetical protein, conserved
EAH_00031610	6	0.3	0.35	0.89	0.39	0.31	1.03	0.3	0.25	0.98	0.26	0.43	1.33	0.32	0.41	1.35	0.3	0.41	2.04	0.2	leucine rich repeat containing protein / ankyrin repeat containing protein, putative
EAH_00030890	5	0.3	0.25	0.66	0.38	0.23	0.92	0.25	0.19	0.81	0.24	0.35	1.26	0.28	0.31	0.87	0.36	na	na	na	hypothetical protein, conserved
EAH_00030360	4	0.3	0.32	0.95	0.33	0.49	1.45	0.33	na	na	na	0.56	1.74	0.32	na	na	na	0.56	2.8	0.2	hypothetical protein, conserved
EAH_00029770	5	0.3	0.36	1.17	0.31	0.34	1.08	0.32	0.33	0.94	0.35	0.52	1.91	0.27	na	na	na	0.48	1.82	0.27	hypothetical protein, conserved
EAH_00029720	4	0.3	0.48	1.31	0.37	na	na	na	na	na	na	0.56	1.93	0.29	0.38	1.43	0.26	0.52	1.77	0.3	hypothetical protein, conserved
EAH_00028520	3	0.3	0.2	1.38	0.14	na	na	na	0.95	1.49	0.64	na	na	na	0.14	1.19	0.12	na	na	na	WD domain, G-beta repeat-containing protein, putative
EAH_00026690	3	0.3	1.07	1.65	0.65	na	na	na	na	na	na	0.18	1.22	0.15	na	na	na	0.21	2.38	0.09	hypothetical protein, conserved
EAH_00025720	3	0.3	na	na	na	na	na	na	0.14	1.04	0.14	0.41	0.97	0.42	na	na	na	0.34	1	0.34	hypothetical protein, conserved
EAH_00024980	4	0.3	na	na	na	0.28	0.76	0.37	0.29	0.78	0.37	0.41	1.98	0.21	na	na	na	0.43	1.63	0.26	hypothetical protein, conserved
EAH_00024760	6	0.3	0.24	0.91	0.27	0.24	0.61	0.4	0.23	0.53	0.43	0.42	1.8	0.23	0.28	1.19	0.23	0.43	1.93	0.22	hypothetical protein, conserved
EAH_00023980	6	0.3	0.21	0.75	0.29	0.21	0.62	0.34	0.13	0.58	0.23	0.43	1.87	0.23	0.63	1.29	0.49	0.46	1.87	0.25	hypothetical protein, conserved
EAH_00023300	6	0.3	0.41	1.33	0.31	0.4	1.17	0.34	0.61	1.43	0.43	0.53	2.13	0.25	0.61	1.94	0.32	0.58	3.74	0.15	hypothetical protein, conserved
EAH_00023140	6	0.3	0.24	0.9	0.27	0.23	0.86	0.26	0.21	0.7	0.29	0.39	1.5	0.26	0.35	0.75	0.47	0.39	1.5	0.26	hypothetical protein, conserved
EAH_00021500	6	0.3	0.4	1.54	0.26	0.45	2.26	0.2	0.52	1.17	0.44	0.63	2.13	0.3	0.4	1.57	0.25	0.6	1.85	0.32	hypothetical protein, conserved
EAH_00021310	5	0.3	0.36	1.11	0.33	na	na	na	0.46	1.29	0.35	0.31	2.07	0.15	0.5	1.1	0.45	0.34	1.7	0.2	Bud site selection-related protein, related
EAH_00020560	5	0.3	0.44	1.78	0.25	0.23	0.75	0.31	0.19	0.58	0.33	na	na	na	0.19	0.72	0.26	0.62	1.82	0.34	hypothetical protein, conserved
EAH_00020290	6	0.3	0.34	1.49	0.23	0.36	1.21	0.3	0.33	1.31	0.26	0.58	2.08	0.28	0.51	1.11	0.46	0.64	2.18	0.3	Ras family domain-containing protein, putative
EAH_00019630	6	0.3	0.26	1.05	0.25	0.26	0.69	0.39	0.24	0.57	0.41	0.46	2.07	0.22	0.24	0.62	0.38	0.44	2.65	0.16	hypothetical protein, conserved
EAH_00018720	1	0.3	na	na	na	0.28	0.93	0.3	na	na	na	na	na	na	na	na	na	na	na	na	hypothetical protein, conserved
EAH_00018570	2	0.3	na	na	na	na	na	na	0.33	0.8	0.41	na	na	na	0.27	1.35	0.2	na	na	na	hypothetical protein, conserved
EAH_00018450	1	0.3	na	na	na	na	na	na	na	na	na	na	na	na	0.24	0.81	0.3	NaN	NaN	NaN	hypothetical protein, conserved
EAH_00017280	5	0.3	0.29	0.94	0.31	0.3	1.14	0.26	0.26	0.88	0.3	na	na	na	0.32	0.88	0.37	0.47	1.63	0.29	hypothetical protein, conserved
EAH_00017010	1	0.3	na	na	na	0.5	1.7	0.3	na	na	na	na	na	na	na	na	na	na	na	na	DNA/RNA non-specific endonuclease domain-containing protein, putative
EAH_00016570	3	0.3	na	na	na	0.39	1.35	0.29	0.38	1.03	0.37	na	na	na	0.35	1.47	0.24	na	na	na	hypothetical protein, conserved
EAH_00015350	6	0.3	0.27	0.68	0.39	0.23	0.64	0.35	0.18	0.65	0.27	0.37	1.22	0.3	0.19	0.71	0.27	0.35	1.68	0.21	RecF/RecN/SMC domain containing protein, related
EAH_00014950	4	0.3	0.17	0.73	0.23	0.17	0.69	0.24	na	na	na	NaN	NaN	NaN	0.34	0.75	0.46	0.46	1.8	0.25	16S rRNA processing protein RimM, putative
EAH_00014790	5	0.3	0.22	1.1	0.2	0.25	0.78	0.32	na	na	na	0.29	1.58	0.18	0.34	0.62	0.55	0.29	1.09	0.27	hypothetical protein, conserved
EAH_00014740	5	0.3	0.17	0.64	0.27	0.19	0.69	0.27	na	na	na	0.46	1.12	0.41	0.15	0.56	0.26	0.38	1.25	0.31	helicase, putative
EAH_00014450	4	0.3	0.3	0.85	0.35	0.28	0.89	0.32	na	na	na	0.45	1.79	0.25	na	na	na	0.44	1.69	0.26	hypothetical protein, conserved
EAH_00013900	5	0.3	0.2	0.98	0.21	0.34	0.79	0.43	0.3	0.87	0.34	na	na	na	0.29	0.92	0.32	0.27	1.4	0.19	hypothetical protein, conserved
EAH_00011700	4	0.3	0.33	0.91	0.37	0.29	1.04	0.28	0.25	0.99	0.25	na	na	na	0.31	1.03	0.3	na	na	na	sag
EAH_00011080	6	0.3	0.25	0.8	0.31	0.3	0.88	0.34	0.21	0.79	0.27	0.39	1.65	0.24	0.25	0.61	0.4	0.41	1.67	0.25	hypothetical protein, conserved
EAH_00010190	6	0.3	0.17	0.47	0.36	0.18	0.65	0.28	0.16	0.45	0.36	0.33	1.38	0.24	0.14	0.44	0.32	0.33	1.4	0.24	hypothetical protein, conserved
EAH_00009010	5	0.3	0.34	1.29	0.26	0.42	1.31	0.32	na	na	na	0.63	1.86	0.34	0.5	1.66	0.3	0.54	1.84	0.29	hypothetical protein, conserved
EAH_00008680	6	0.3	0.21	0.62	0.34	0.17	0.62	0.28	0.14	0.48	0.28	0.31	1.29	0.24	0.22	0.53	0.41	0.3	1.26	0.24	hypothetical protein, conserved
EAH_00007790	3	0.3	0.18	0.64	0.28	na	na	na	0.19	0.62	0.3	na	na	na	0.18	0.58	0.31	na	na	na	hypothetical protein, conserved
EAH_00007720	3	0.3	0.21	0.76	0.28	0.25	0.8	0.32	0.2	0.65	0.3	na	na	na	na	na	na	na	na	na	peroxisome biogenesis factor 1, putative
EAH_00007280	6	0.3	0.37	1	0.37	0.32	0.93	0.34	0.34	1.03	0.33	0.41	1.78	0.23	0.44	1.56	0.29	0.41	1.88	0.22	hypothetical protein, conserved
EAH_00006870	2	0.3	na	na	na	0.18	1.04	0.17	0.53	1.27	0.42	na	na	na	na	na	na	na	na	na	dense granular protein GRA10, putative
EAH_00005940	5	0.3	0.34	0.83	0.41	na	na	na	0.36	1.37	0.26	0.45	2.29	0.2	0.41	1.17	0.35	0.47	1.78	0.27	hypothetical protein, conserved
EAH_00005890	4	0.3	0.32	0.95	0.34	0.33	1.29	0.26	na	na	na	0.4	1.43	0.28	na	na	na	0.42	1.36	0.31	radical SAM domain containing protein, putative
EAH_00005620	3	0.3	0.36	1.28	0.28	na	na	na	0.32	0.75	0.43	0.53	2.99	0.18	na	na	na	na	na	na	hypothetical protein, conserved
EAH_00004920	6	0.3	0.41	0.94	0.43	0.22	0.77	0.28	0.16	0.71	0.22	0.34	2.05	0.17	0.96	1.89	0.51	0.33	1.82	0.18	hypothetical protein, conserved
EAH_00003690	4	0.3	0.23	0.89	0.26	0.29	0.86	0.33	0.24	0.65	0.37	na	na	na	0.21	0.9	0.24	na	na	na	sag
EAH_00003420	3	0.3	0.2	0.76	0.26	0.3	0.87	0.34	na	na	na	na	na	na	0.25	0.83	0.3	NaN	NaN	NaN	hypothetical protein, conserved
EAH_00003050	6	0.3	0.19	0.54	0.35	0.22	0.6	0.37	0.15	0.51	0.29	0.33	1.42	0.23	0.17	0.51	0.32	0.33	1.44	0.23	hypothetical protein, conserved
EAH_00002580	1	0.3	NaN	NaN	NaN	na	na	na	0.41	1.34	0.3	na	na	na	na	na	na	na	na	na	ribosomal protein L9, N-terminal domain protein, putative
EAH_00002150	4	0.3	na	na	na	0.31	1.33	0.23	0.23	0.99	0.23	0.34	0.89	0.38	na	na	na	0.25	0.73	0.34	hypothetical protein, conserved
EAH_00001270	6	0.3	0.18	0.6	0.31	0.22	0.67	0.32	0.19	0.54	0.35	0.4	1.41	0.29	0.19	0.55	0.34	0.36	1.59	0.23	hypothetical protein, conserved
EAH_00064600	6	0.29	0.27	0.94	0.29	0.18	1.66	0.11	0.34	0.67	0.51	0.39	1.19	0.33	0.37	1.62	0.23	0.37	1.3	0.29	hypothetical protein, conserved
EAH_00062350	1	0.29	na	na	na	na	na	na	na	na	na	na	na	na	0.45	1.54	0.29	na	na	na	hypothetical protein, conserved
EAH_00061310	4	0.29	0.25	0.84	0.3	0.27	0.83	0.32	0.22	0.88	0.26	na	na	na	0.6	2.04	0.3	na	na	na	hypothetical protein, conserved
EAH_00061140	4	0.29	0.63	1.45	0.43	NaN	NaN	NaN	0.45	1.45	0.31	0.37	1.62	0.23	na	na	na	0.39	1.9	0.2	hypothetical protein, conserved
EAH_00061130	4	0.29	0.37	0.9	0.41	0.32	0.67	0.48	na	na	na	0.28	2.24	0.13	na	na	na	0.28	1.81	0.16	hypothetical protein, conserved
EAH_00060630	2	0.29	0.36	1.01	0.35	0.44	1.98	0.22	na	na	na	na	na	na	na	na	na	na	na	na	hypothetical protein, conserved
EAH_00060510	4	0.29	NaN	NaN	NaN	0.28	1.61	0.17	0.42	0.69	0.61	0.36	2.04	0.18	na	na	na	0.38	2.09	0.18	hypothetical protein, conserved
EAH_00058700	2	0.29	na	na	na	na	na	na	na	na	na	0.6	2.2	0.27	na	na	na	0.59	1.86	0.32	hypothetical protein, conserved
EAH_00056220	3	0.29	na	na	na	na	na	na	na	na	na	0.45	1.23	0.36	0.51	1.83	0.28	0.43	1.94	0.22	hypothetical protein, conserved
EAH_00055980	4	0.29	NaN	NaN	NaN	0.39	1.89	0.21	0.97	1.53	0.64	0.38	2	0.19	na	na	na	0.26	1.99	0.13	hypothetical protein, conserved
EAH_00055510	4	0.29	na	na	na	0.33	1.34	0.25	0.35	1.29	0.27	0.41	1.26	0.32	na	na	na	0.51	1.52	0.33	hypothetical protein, conserved
EAH_00055090	1	0.29	na	na	na	na	na	na	0.36	1.23	0.29	na	na	na	na	na	na	na	na	na	hypothetical protein, conserved
EAH_00054970	3	0.29	na	na	na	na	na	na	0.47	0.99	0.48	0.5	2.9	0.17	na	na	na	0.52	2.3	0.23	hypothetical protein, conserved
EAH_00053920	5	0.29	na	na	na	0.35	1.07	0.33	0.3	0.9	0.33	0.4	1.35	0.3	0.38	1.55	0.24	0.43	1.62	0.26	hypothetical protein, conserved
EAH_00053700	1	0.29	0.22	0.76	0.29	na	na	na	na	na	na	na	na	na	na	na	na	na	na	na	hypothetical protein, conserved
EAH_00053560	3	0.29	0.36	1.42	0.26	na	na	na	NaN	NaN	NaN	NaN	NaN	NaN	0.34	1.26	0.27	0.53	1.56	0.34	hypothetical protein, conserved
EAH_00053080	3	0.29	0.26	3.43	0.07	na	na	na	1.01	2.52	0.4	0.62	1.56	0.4	na	na	na	na	na	na	D-3-phosphoglycerate dehydrogenase, putative
EAH_00053000	5	0.29	0.43	0.86	0.5	0.14	0.52	0.27	0.23	1.28	0.18	0.38	1.31	0.29	na	na	na	0.19	0.99	0.19	ubiquitin carboxyl-terminal hydrolase isozyme, putative
EAH_00052300	4	0.29	0.22	0.76	0.29	0.23	0.88	0.26	na	na	na	0.39	1.34	0.29	0.23	0.74	0.3	na	na	na	hypothetical protein, conserved
EAH_00052280	5	0.29	0.28	1.54	0.18	na	na	na	0.96	2.65	0.36	0.34	1.13	0.3	0.37	1.28	0.29	0.38	1.18	0.33	hypothetical protein, conserved
EAH_00051950	4	0.29	0.53	1.35	0.39	0.3	1.18	0.26	0.25	1.11	0.22	NaN	NaN	NaN	0.43	1.39	0.31	NaN	NaN	NaN	hypothetical protein, conserved
EAH_00050830	5	0.29	0.36	1.12	0.32	0.54	1.12	0.48	0.4	1.42	0.28	na	na	na	0.55	2.4	0.23	0.58	4.49	0.13	hypothetical protein, conserved
EAH_00050440	5	0.29	0.34	1.11	0.31	na	na	na	0.33	1.55	0.21	0.51	1.63	0.31	0.37	1.26	0.3	0.49	1.58	0.31	hypothetical protein, conserved
EAH_00050130	1	0.29	na	na	na	na	na	na	na	na	na	NaN	NaN	NaN	na	na	na	0.61	2.09	0.29	hypothetical protein, conserved
EAH_00050120	5	0.29	0.31	1.12	0.28	na	na	na	0.36	0.86	0.42	0.42	2.1	0.2	0.42	1.33	0.32	0.44	1.98	0.22	1-phosphatidylinositol-4-phosphate 5-kinase, putative
EAH_00050100	6	0.29	0.22	0.69	0.32	0.32	0.96	0.33	0.21	0.78	0.27	0.46	1.35	0.34	0.26	1.28	0.21	0.43	1.47	0.29	hypothetical protein, conserved
EAH_00049820	1	0.29	NaN	NaN	NaN	na	na	na	0.43	1.48	0.29	NaN	NaN	NaN	na	na	na	NaN	NaN	NaN	solute carrier family 13, putative
EAH_00048330	5	0.29	0.28	1.11	0.26	na	na	na	0.47	1.75	0.27	0.38	1.34	0.28	0.31	1.03	0.3	0.42	1.26	0.33	hypothetical protein, conserved
EAH_00047990	6	0.29	0.26	0.94	0.28	0.27	0.82	0.33	0.22	0.85	0.26	0.58	1.72	0.34	0.31	1.35	0.23	0.61	2.12	0.29	hypothetical protein, conserved
EAH_00047900	5	0.29	0.61	1.07	0.57	0.34	1.35	0.25	0.48	2.03	0.24	na	na	na	0.3	1.15	0.27	0.32	2.29	0.14	hypothetical protein, conserved
EAH_00047190	4	0.29	0.25	0.89	0.28	na	na	na	0.26	0.9	0.29	0.39	1.12	0.35	na	na	na	0.31	1.2	0.26	hypothetical protein, conserved
EAH_00046220	6	0.29	0.26	0.9	0.29	0.27	1.15	0.23	0.28	1.05	0.26	0.38	0.91	0.42	0.23	1.13	0.2	0.49	1.36	0.36	hypothetical protein, conserved
EAH_00046030	3	0.29	0.31	1.68	0.18	0.32	1.67	0.19	na	na	na	NaN	NaN	NaN	0.38	0.75	0.5	NaN	NaN	NaN	EF hand family protein, related
EAH_00044860	3	0.29	0.48	1.27	0.38	0.34	1.11	0.31	0.22	1.17	0.19	na	na	na	na	na	na	na	na	na	Exonuclease 3'-5' domain-like-containing protein 1, related, related
EAH_00043580	3	0.29	0.33	0.97	0.34	0.37	1.73	0.21	0.29	0.96	0.3	na	na	na	na	na	na	na	na	na	hypothetical protein, conserved
EAH_00043370	2	0.29	na	na	na	0.26	1.22	0.22	na	na	na	na	na	na	0.29	0.78	0.37	na	na	na	dimethyladenosine synthase, putative
EAH_00042970	3	0.29	na	na	na	na	na	na	0.45	2.35	0.19	0.85	1.65	0.52	na	na	na	0.52	3.14	0.16	hypothetical protein, conserved
EAH_00042780	6	0.29	0.38	0.88	0.43	0.49	1.87	0.26	0.4	1.22	0.33	0.33	1.45	0.23	0.34	1.3	0.26	0.42	1.64	0.25	hypothetical protein, conserved
EAH_00042530	3	0.29	0.43	1.16	0.37	na	na	na	0.49	1.52	0.32	NaN	NaN	NaN	0.36	1.96	0.18	na	na	na	sushi domain-containing protein / SCR repeat-containing protein, putative
EAH_00042370	2	0.29	na	na	na	0.44	1.23	0.36	na	na	na	na	na	na	na	na	na	0.43	2.01	0.21	hypothetical protein, conserved
EAH_00042130	1	0.29	na	na	na	NaN	NaN	NaN	na	na	na	na	na	na	0.27	0.93	0.29	na	na	na	hypothetical protein, conserved
EAH_00041780	4	0.29	0.35	1.29	0.27	0.37	1.02	0.36	na	na	na	na	na	na	0.44	2.07	0.21	0.51	1.48	0.34	hypothetical protein, conserved
EAH_00041340	3	0.29	0.46	1.36	0.33	na	na	na	0.24	1.02	0.23	na	na	na	na	na	na	0.57	1.89	0.3	hypothetical protein, conserved
EAH_00041090	1	0.29	na	na	na	na	na	na	na	na	na	na	na	na	0.55	1.94	0.29	na	na	na	hypothetical protein, conserved
EAH_00041060	3	0.29	0.38	1.22	0.31	na	na	na	na	na	na	0.52	2.38	0.22	na	na	na	0.46	1.41	0.33	hypothetical protein, conserved
EAH_00040850	3	0.29	0.37	1.44	0.26	na	na	na	0.44	1.41	0.31	na	na	na	0.44	1.41	0.31	na	na	na	hypothetical protein, conserved
EAH_00039690	3	0.29	0.25	0.74	0.33	0.25	0.94	0.27	na	na	na	0.35	1.3	0.27	na	na	na	na	na	na	hypothetical protein, conserved
EAH_00033520	3	0.29	0.35	1.27	0.28	na	na	na	na	na	na	0.47	1.9	0.25	na	na	na	0.5	1.47	0.34	hypothetical protein, conserved
EAH_00033370	5	0.29	0.2	1.28	0.15	0.26	1.2	0.22	0.2	0.85	0.24	na	na	na	0.51	1.51	0.34	0.83	1.61	0.52	hypothetical protein, conserved
EAH_00033330	6	0.29	0.44	1.18	0.38	0.52	1.46	0.35	0.4	1.39	0.29	0.55	3.24	0.17	0.38	0.99	0.39	0.44	2.28	0.19	hypothetical protein, conserved
EAH_00033320	3	0.29	0.39	1.3	0.3	0.29	1.54	0.19	na	na	na	na	na	na	0.4	1.01	0.39	na	na	na	hypothetical protein, conserved
EAH_00032010	5	0.29	0.15	0.75	0.21	0.21	0.62	0.34	na	na	na	0.42	1.25	0.34	0.14	0.5	0.28	0.37	1.29	0.28	leucine rich repeat protein, putative
EAH_00031870	6	0.29	0.3	1.21	0.25	0.37	1.54	0.24	0.31	1.18	0.26	0.53	1.42	0.37	0.29	1.27	0.23	0.65	1.78	0.37	plasmodium falciparum CPW-WPC domain-containing protein, putative
EAH_00031450	3	0.29	0.4	1.15	0.35	0.41	1.14	0.36	0.42	2.79	0.15	na	na	na	na	na	na	na	na	na	hypothetical protein, conserved
EAH_00030310	4	0.29	0.37	1.64	0.23	0.42	1.77	0.24	0.74	1.61	0.46	na	na	na	0.53	2.36	0.23	na	na	na	hypothetical protein, conserved
EAH_00030290	6	0.29	0.45	1.4	0.32	0.27	1.17	0.23	0.24	0.73	0.33	0.41	1.96	0.21	0.31	0.84	0.37	0.37	1.39	0.27	hypothetical protein, conserved
EAH_00030130	4	0.29	na	na	na	0.31	1.26	0.25	0.26	1.36	0.19	0.33	0.83	0.4	na	na	na	0.26	0.77	0.34	hypothetical protein, conserved
EAH_00030010	5	0.29	na	na	na	0.47	2.09	0.23	0.29	0.87	0.33	0.76	2.34	0.32	0.55	1.76	0.31	0.63	2.52	0.25	hypothetical protein, conserved
EAH_00030000	1	0.29	na	na	na	NaN	NaN	NaN	na	na	na	na	na	na	na	na	na	0.52	1.81	0.29	vacuolar protein sorting-associated protein, putative
EAH_00028710	2	0.29	0.15	1.35	0.11	na	na	na	0.94	2	0.47	NaN	NaN	NaN	na	na	na	NaN	NaN	NaN	cleft lip and palate transmembrane protein 1, putative
EAH_00028270	6	0.29	0.21	0.62	0.34	0.21	0.61	0.34	0.2	0.55	0.35	0.37	1.94	0.19	0.18	0.49	0.36	0.34	1.98	0.17	hypothetical protein, conserved
EAH_00026320	1	0.29	na	na	na	0.69	2.36	0.29	na	na	na	na	na	na	na	na	na	na	na	na	hypothetical protein, conserved
EAH_00026170	2	0.29	na	na	na	0.33	1.33	0.25	0.28	0.85	0.33	na	na	na	na	na	na	na	na	na	hypothetical protein, conserved
EAH_00025470	5	0.29	0.2	0.78	0.26	0.27	0.71	0.38	0.22	0.58	0.38	0.36	1.58	0.23	0.19	0.92	0.2	na	na	na	hypothetical protein, conserved
EAH_00025380	4	0.29	0.5	1.22	0.41	na	na	na	0.39	0.97	0.41	0.34	2.09	0.16	na	na	na	0.37	2.08	0.18	hypothetical protein, conserved
EAH_00025240	5	0.29	0.21	0.77	0.27	0.24	0.69	0.35	0.24	0.67	0.35	0.51	2.29	0.22	na	na	na	0.52	2.2	0.24	hypothetical protein, conserved
EAH_00024100	6	0.29	0.27	1.05	0.26	0.25	0.69	0.36	0.27	0.84	0.32	0.42	1.59	0.26	0.24	0.78	0.3	0.4	1.61	0.25	hypothetical protein, conserved
EAH_00022900	3	0.29	0.45	2.4	0.19	0.51	1.38	0.37	na	na	na	NaN	NaN	NaN	0.43	1.39	0.31	na	na	na	hypothetical protein, conserved
EAH_00022830	4	0.29	0.24	1.42	0.17	na	na	na	0.54	1.67	0.32	na	na	na	0.35	1	0.36	0.58	1.88	0.31	hypothetical protein, conserved
EAH_00022030	4	0.29	na	na	na	0.35	0.83	0.43	na	na	na	0.35	1.84	0.19	0.47	1.17	0.4	0.34	2.26	0.15	hypothetical protein, conserved
EAH_00021840	4	0.29	0.2	0.86	0.23	0.3	0.86	0.35	0.29	1.24	0.23	na	na	na	na	na	na	0.49	1.36	0.36	hypothetical protein, conserved
EAH_00021720	4	0.29	0.49	1.23	0.4	na	na	na	0.43	1.89	0.23	0.43	1.57	0.28	na	na	na	0.46	1.92	0.24	hypothetical protein, conserved
EAH_00020340	5	0.29	0.23	0.76	0.3	0.22	0.67	0.32	na	na	na	0.4	1.59	0.25	0.2	0.55	0.36	0.39	1.9	0.2	hypothetical protein, conserved
EAH_00020220	5	0.29	0.31	0.67	0.47	0.27	1.09	0.25	na	na	na	0.66	2.45	0.27	0.3	0.67	0.45	0.65	26.73	0.02	hypothetical protein, conserved
EAH_00020000	4	0.29	0.32	1.88	0.17	0.37	1.37	0.27	0.27	0.85	0.31	NaN	NaN	NaN	0.34	0.82	0.41	NaN	NaN	NaN	hypothetical protein, conserved
EAH_00019970	2	0.29	0.39	1.48	0.26	0.51	1.58	0.33	na	na	na	NaN	NaN	NaN	na	na	na	NaN	NaN	NaN	gamma-glutamyl phosphate reductase, putative
EAH_00019760	3	0.29	0.24	1.3	0.18	na	na	na	0.49	1.33	0.37	0.36	1.17	0.31	na	na	na	NaN	NaN	NaN	hypothetical protein, conserved
EAH_00019490	6	0.29	0.2	0.7	0.29	0.27	0.87	0.31	0.2	0.62	0.33	0.4	1.75	0.23	0.19	0.62	0.3	0.4	1.59	0.25	hypothetical protein, conserved
EAH_00019270	6	0.29	0.21	0.64	0.33	0.23	0.72	0.32	0.18	0.62	0.29	0.34	1.61	0.21	0.21	0.58	0.36	0.34	1.53	0.22	hypothetical protein, conserved
EAH_00019180	6	0.29	0.18	0.55	0.32	0.19	0.81	0.24	0.15	0.7	0.22	0.36	1.09	0.33	0.15	0.51	0.3	0.36	1.15	0.31	cyclin-dependent kinase, putative
EAH_00018550	4	0.29	0.2	0.72	0.28	0.19	0.63	0.31	0.15	0.52	0.28	NaN	NaN	NaN	0.17	0.62	0.28	NaN	NaN	NaN	hypothetical protein, conserved
EAH_00018340	3	0.29	0.48	1.83	0.26	0.35	1.37	0.26	0.34	0.94	0.36	na	na	na	NaN	NaN	NaN	na	na	na	splicing factor U2AF-associated protein, related, putative
EAH_00017960	3	0.29	na	na	na	na	na	na	0.4	1.01	0.4	0.5	1.97	0.26	na	na	na	0.36	1.76	0.21	patatin-like phospholipase domain-containing protein, putative
EAH_00017870	4	0.29	0.35	1.17	0.29	0.31	1.06	0.29	0.29	1.07	0.27	na	na	na	0.37	1.16	0.32	na	na	na	hypothetical protein, conserved
EAH_00017560	2	0.29	0.26	0.86	0.3	0.23	0.84	0.28	na	na	na	na	na	na	na	na	na	na	na	na	Serine proteinase inhibitor, clade B, member 1, related
EAH_00017290	4	0.29	na	na	na	0.25	0.73	0.34	0.21	0.66	0.32	0.48	2.06	0.23	na	na	na	0.5	1.79	0.28	hypothetical protein, conserved
EAH_00016730	2	0.29	na	na	na	0.34	0.72	0.47	na	na	na	0.42	3.63	0.12	na	na	na	NaN	NaN	NaN	hypothetical protein, conserved
EAH_00016320	2	0.29	na	na	na	0.27	0.98	0.28	0.3	1.02	0.29	na	na	na	na	na	na	na	na	na	hypothetical protein, conserved
EAH_00015860	3	0.29	na	na	na	0.35	1.47	0.24	0.37	0.86	0.43	na	na	na	0.32	1.56	0.21	na	na	na	phosphatidylserine decarboxylase proenzyme, putative
EAH_00015760	4	0.29	0.25	0.92	0.27	0.35	1.14	0.31	0.27	0.96	0.29	na	na	na	0.28	0.87	0.32	na	na	na	ftsJ-like methyltransferase domain-containing protein, putative
EAH_00015520	6	0.29	0.26	0.83	0.31	0.34	0.86	0.4	0.17	0.9	0.19	0.4	1.56	0.26	0.24	0.62	0.39	0.43	1.93	0.22	hypothetical protein, conserved
EAH_00014760	4	0.29	0.15	0.68	0.22	0.19	0.84	0.22	0.17	0.56	0.31	NaN	NaN	NaN	0.13	0.34	0.39	na	na	na	50s ribosomal protein L12, putative
EAH_00014350	6	0.29	0.33	0.96	0.35	0.31	0.98	0.31	0.27	0.88	0.31	0.43	1.74	0.25	0.45	1.45	0.31	0.44	1.74	0.25	hypothetical protein, conserved
EAH_00013100	6	0.29	0.35	1.24	0.28	0.31	1.11	0.28	0.28	0.83	0.34	0.43	1.77	0.24	0.28	0.78	0.36	0.43	1.73	0.25	hypothetical protein, conserved
EAH_00012660	6	0.29	0.27	1.23	0.22	0.34	1.46	0.24	0.3	1.08	0.28	0.56	1.4	0.4	0.41	1.41	0.29	0.54	1.7	0.32	hypothetical protein, conserved
EAH_00012500	5	0.29	0.31	0.73	0.43	0.23	0.83	0.27	na	na	na	0.34	2.02	0.17	0.53	1.42	0.38	0.34	1.56	0.22	poly(ADP-ribose) glycohydrolase, putative
EAH_00012170	6	0.29	0.21	0.93	0.22	0.32	0.84	0.38	0.28	0.88	0.32	0.4	1.82	0.22	0.32	0.85	0.37	0.35	1.41	0.25	hypothetical protein, conserved
EAH_00011950	6	0.29	0.18	0.48	0.37	0.24	0.67	0.35	0.1	0.46	0.21	0.31	1.42	0.22	0.18	0.43	0.42	0.28	1.51	0.18	hypothetical protein, conserved
EAH_00011090	6	0.29	0.22	0.63	0.35	0.18	0.75	0.24	0.22	0.6	0.37	0.29	1.35	0.22	0.19	0.53	0.37	0.29	1.28	0.23	hypothetical protein, conserved
EAH_00010700	4	0.29	0.28	0.96	0.29	0.24	0.72	0.34	na	na	na	0.37	1.35	0.27	na	na	na	0.32	1.23	0.26	hypothetical protein, conserved
EAH_00008800	6	0.29	0.21	0.73	0.29	0.24	0.74	0.32	0.16	0.53	0.31	0.37	1.4	0.27	0.19	0.6	0.31	0.37	1.59	0.23	hypothetical protein, conserved
EAH_00008450	4	0.29	0.3	0.8	0.38	na	na	na	0.23	0.71	0.32	na	na	na	0.27	1.02	0.26	0.42	2.06	0.2	hypothetical protein, conserved
EAH_00008080	4	0.29	1	2.2	0.45	0.18	1.34	0.14	na	na	na	0.29	1.55	0.19	0.34	0.91	0.37	na	na	na	F-box domain containing protein, putative
EAH_00006420	6	0.29	0.15	0.51	0.3	0.19	0.62	0.31	0.14	0.43	0.34	0.33	1.38	0.24	0.15	0.51	0.3	0.33	1.35	0.24	hypothetical protein, conserved
EAH_00006410	4	0.29	0.22	0.56	0.39	0.15	0.88	0.17	0.22	0.54	0.41	na	na	na	0.13	0.76	0.17	na	na	na	hypothetical protein, conserved
EAH_00004770	4	0.29	na	na	na	0.26	0.84	0.31	0.23	0.82	0.28	0.5	1.69	0.3	0.24	0.88	0.27	na	na	na	hypothetical protein, conserved
EAH_00003890	6	0.29	0.2	0.56	0.36	0.19	0.67	0.28	0.25	0.69	0.36	0.37	1.78	0.21	0.21	0.63	0.33	0.37	1.87	0.2	hypothetical protein, conserved
EAH_00003870	3	0.29	0.73	1.96	0.37	na	na	na	0.11	0.68	0.16	0.33	1	0.33	na	na	na	na	na	na	hypothetical protein, conserved
EAH_00003320	5	0.29	0.17	1.03	0.17	0.38	1.36	0.28	0.34	1.06	0.32	0.46	1.64	0.28	0.54	1.41	0.38	na	na	na	hypothetical protein, conserved
EAH_00002180	6	0.29	0.21	0.88	0.24	0.33	1.23	0.27	0.34	0.8	0.42	0.32	1.19	0.27	0.24	0.75	0.32	0.28	1.35	0.21	hypothetical protein, conserved
EAH_00002170	6	0.29	0.22	0.8	0.28	0.35	1.2	0.29	0.54	1.48	0.36	0.41	1.73	0.23	0.24	0.8	0.3	0.38	1.5	0.26	hypothetical protein, conserved
EAH_00001780	5	0.29	0.19	0.63	0.3	na	na	na	0.23	0.61	0.38	0.46	2.32	0.2	0.19	0.62	0.31	0.46	1.84	0.25	hypothetical protein, conserved
EAH_00001380	5	0.29	0.22	0.75	0.29	0.3	0.97	0.31	na	na	na	0.39	1.64	0.24	0.3	0.89	0.34	0.43	1.66	0.26	hypothetical protein, conserved
EAH_00001260	4	0.29	0.26	0.83	0.31	0.19	0.74	0.26	0.22	0.73	0.3	na	na	na	0.27	0.98	0.28	na	na	na	hypothetical protein, conserved
EAH_00001110	5	0.29	na	na	na	0.24	0.74	0.32	0.17	0.65	0.26	0.45	1.54	0.29	0.24	0.79	0.3	0.46	1.77	0.26	GTP-binding conserved hypothetical domain-containing protein, putative
EAH_00000430	2	0.29	0.32	1.5	0.21	0.33	0.93	0.36	na	na	na	na	na	na	na	na	na	na	na	na	hypothetical protein, conserved
EAH_00065130	1	0.28	0.16	0.56	0.28	na	na	na	na	na	na	na	na	na	na	na	na	NaN	NaN	NaN	Cytadherence high molecular weight protein 2, related
EAH_00063960	2	0.28	0.45	1.34	0.34	na	na	na	0.38	1.7	0.23	NaN	NaN	NaN	na	na	na	NaN	NaN	NaN	hypothetical protein, conserved
EAH_00063920	4	0.28	0.71	2.42	0.29	0.15	2.41	0.06	NaN	NaN	NaN	na	na	na	0.88	1.55	0.57	0.35	1.67	0.21	FF domain-containing protein, putative
EAH_00061810	4	0.28	0.47	1.89	0.25	0.66	1.21	0.54	na	na	na	0.55	5.28	0.1	NaN	NaN	NaN	0.47	1.95	0.24	acetyltransferase domain-containing protein, putative
EAH_00060060	1	0.28	na	na	na	na	na	na	na	na	na	na	na	na	0.28	0.98	0.28	na	na	na	hypothetical protein, conserved
EAH_00059390	5	0.28	0.16	0.73	0.21	0.34	0.86	0.4	0.2	0.77	0.25	0.32	1.37	0.23	0.26	0.82	0.32	na	na	na	hypothetical protein, conserved
EAH_00059070	6	0.28	0.27	0.79	0.35	0.18	1	0.18	0.18	0.55	0.33	0.32	1.19	0.27	0.25	0.92	0.27	0.35	1.32	0.26	hypothetical protein, conserved
EAH_00058680	6	0.28	0.25	1.11	0.23	0.23	1.19	0.2	0.45	1.23	0.37	0.4	1.54	0.26	0.23	0.71	0.32	0.61	1.92	0.32	hypothetical protein, conserved
EAH_00057360	5	0.28	0.54	2.38	0.23	0.72	2.64	0.27	0.56	2.09	0.27	0.72	2.25	0.32	na	na	na	0.74	2.29	0.32	hypothetical protein, conserved
EAH_00057300	4	0.28	0.26	0.63	0.42	0.21	1.29	0.16	0.18	0.74	0.24	0.25	0.88	0.29	na	na	na	na	na	na	hypothetical protein, conserved
EAH_00056540	4	0.28	0.29	1.1	0.27	na	na	na	na	na	na	0.44	2.19	0.2	0.56	1.29	0.43	0.42	1.84	0.23	hypothetical protein, conserved
EAH_00051450	6	0.28	0.3	0.85	0.35	0.31	1.32	0.24	0.33	1.26	0.26	0.47	1.78	0.26	0.3	0.94	0.32	0.42	1.56	0.27	kinesin motor domain-containing protein, putative
EAH_00051060	1	0.28	0.4	1.44	0.28	na	na	na	na	na	na	na	na	na	na	na	na	na	na	na	hypothetical protein, conserved
EAH_00049720	6	0.28	0.11	0.62	0.19	0.22	0.71	0.31	0.17	0.54	0.3	0.3	1.12	0.27	0.79	2.37	0.33	0.33	1.27	0.26	hypothetical protein, conserved
EAH_00048460	5	0.28	0.5	1.6	0.31	0.44	1.96	0.22	0.38	1.73	0.22	0.56	1.88	0.3	0.55	1.61	0.34	na	na	na	NLI interacting factor-like phosphatase domain-containing protein, putative
EAH_00046890	4	0.28	0.83	3.13	0.26	na	na	na	0.23	1.42	0.16	0.57	1.93	0.3	na	na	na	0.6	1.56	0.39	hypothetical protein, conserved
EAH_00046300	6	0.28	0.41	1.37	0.29	0.28	1.18	0.24	0.5	1.38	0.36	0.6	2.09	0.29	0.34	1.36	0.25	0.62	2.52	0.25	hypothetical protein, conserved
EAH_00045590	5	0.28	0.34	1.21	0.28	0.24	0.84	0.29	na	na	na	0.34	1.8	0.19	0.34	1.17	0.29	0.38	1	0.38	hypothetical protein, conserved
EAH_00045560	5	0.28	0.43	1.65	0.26	0.48	1.37	0.35	na	na	na	0.54	1.94	0.28	0.47	1.51	0.31	0.49	2.76	0.18	hypothetical protein, conserved
EAH_00043970	5	0.28	0.3	0.96	0.32	na	na	na	0.26	0.86	0.3	0.48	2.01	0.24	0.34	1.15	0.3	0.42	1.76	0.24	hypothetical protein, conserved
EAH_00043490	5	0.28	0.21	1.27	0.16	0.37	1.33	0.28	0.31	1.32	0.23	0.43	1.38	0.31	0.36	0.9	0.4	na	na	na	hypothetical protein, conserved
EAH_00043380	1	0.28	na	na	na	na	na	na	na	na	na	0.35	1.26	0.28	NaN	NaN	NaN	na	na	na	hypothetical protein, conserved
EAH_00042850	4	0.28	0.24	1	0.24	0.27	0.94	0.28	0.23	0.74	0.32	0.35	1.23	0.29	na	na	na	na	na	na	hypothetical protein, conserved
EAH_00042620	1	0.28	na	na	na	na	na	na	0.3	1.07	0.28	na	na	na	na	na	na	na	na	na	hypothetical protein, conserved
EAH_00041710	6	0.28	0.16	0.52	0.31	0.2	0.64	0.31	0.16	0.55	0.28	0.31	1.22	0.25	0.15	0.49	0.31	0.29	1.24	0.23	hypothetical protein, conserved
EAH_00040220	3	0.28	0.41	1.41	0.29	0.35	1.13	0.31	0.21	0.91	0.23	na	na	na	na	na	na	na	na	na	GRAM domain-containing protein, putative
EAH_00039250	4	0.28	na	na	na	0.33	1.05	0.31	na	na	na	0.5	1.88	0.27	0.39	1.34	0.29	0.48	1.9	0.25	hypothetical protein, conserved
EAH_00039200	2	0.28	0.38	1.77	0.22	0.3	0.88	0.34	na	na	na	na	na	na	na	na	na	na	na	na	hypothetical protein, conserved
EAH_00038580	4	0.28	0.28	0.86	0.33	0.25	0.82	0.3	0.18	0.94	0.19	na	na	na	0.31	1.08	0.29	na	na	na	phosphatidylinositol 3- and 4-kinase domain-containing protein, putative
EAH_00037820	4	0.28	0.57	2.76	0.21	na	na	na	0.38	1.28	0.3	0.8	3.01	0.27	0.72	2.04	0.36	na	na	na	hypothetical protein, conserved
EAH_00037200	4	0.28	0.21	0.79	0.26	na	na	na	0.22	0.66	0.33	0.28	1.07	0.26	na	na	na	0.29	1.07	0.27	zinc finger DHHC domain-containing protein, putative
EAH_00035450	6	0.28	0.46	1.58	0.29	0.25	1.55	0.16	0.32	1.5	0.21	0.66	1.89	0.35	0.27	1	0.27	0.51	1.23	0.42	hypothetical protein, conserved
EAH_00034490	5	0.28	na	na	na	0.16	1.13	0.14	0.21	0.73	0.28	0.39	1.09	0.36	0.25	1.05	0.24	0.5	1.38	0.36	hypothetical protein, conserved
EAH_00034450	5	0.28	1.25	1.46	0.85	0.2	0.97	0.21	na	na	na	0.13	1.07	0.12	0.08	1.02	0.08	0.12	0.93	0.13	hypothetical protein, conserved
EAH_00032950	3	0.28	0.3	1.21	0.25	0.3	1.24	0.24	0.58	1.58	0.37	na	na	na	na	na	na	na	na	na	hypothetical protein, conserved
EAH_00032320	6	0.28	0.19	0.67	0.28	0.21	0.63	0.33	0.17	0.58	0.28	0.32	1.3	0.25	0.18	0.58	0.31	0.32	1.44	0.23	ubiquitin-activating enzyme E1, putative
EAH_00031480	5	0.28	0.45	0.97	0.46	0.27	1.45	0.18	0.38	0.99	0.39	0.31	1.21	0.26	0.26	2.35	0.11	na	na	na	Cytidine and deoxycytidylate deaminase zinc-binding domain-containing protein, putative
EAH_00030220	4	0.28	0.31	1.1	0.28	0.29	0.96	0.3	0.28	1.21	0.23	na	na	na	0.27	0.84	0.32	na	na	na	hypothetical protein, conserved
EAH_00029100	5	0.28	0.28	0.82	0.35	0.32	1.08	0.29	0.19	0.73	0.27	0.31	1.78	0.18	0.31	0.94	0.33	na	na	na	hypothetical protein, conserved
EAH_00028090	5	0.28	0.2	0.86	0.23	na	na	na	0.2	0.87	0.23	0.36	1.08	0.33	0.29	1.27	0.23	0.41	1.08	0.38	hypothetical protein, conserved
EAH_00027370	1	0.28	na	na	na	na	na	na	0.35	1.26	0.28	na	na	na	na	na	na	na	na	na	SNF2 super family, related
EAH_00026910	2	0.28	na	na	na	na	na	na	na	na	na	0.44	2.14	0.21	na	na	na	0.47	1.32	0.36	hypothetical protein, conserved
EAH_00026570	4	0.28	na	na	na	0.31	1.59	0.19	0.51	1.19	0.43	NaN	NaN	NaN	0.57	1.83	0.31	0.48	2.86	0.17	hypothetical protein, conserved
EAH_00025870	3	0.28	0.8	2.51	0.32	0.12	0.59	0.2	na	na	na	na	na	na	0.23	0.72	0.32	na	na	na	p60 katanin, putative
EAH_00025780	1	0.28	0.62	2.25	0.28	na	na	na	na	na	na	NaN	NaN	NaN	na	na	na	NaN	NaN	NaN	GDP-fucose transporter 1, putative
EAH_00024940	2	0.28	na	na	na	na	na	na	na	na	na	0.5	1.37	0.36	na	na	na	0.45	2.2	0.21	hypothetical protein, conserved
EAH_00024370	1	0.28	0.25	0.9	0.28	na	na	na	na	na	na	na	na	na	na	na	na	na	na	na	hypothetical protein, conserved
EAH_00023820	6	0.28	0.18	0.56	0.32	0.17	0.63	0.27	0.16	0.52	0.3	0.33	1.26	0.26	0.18	0.58	0.3	0.32	1.31	0.24	hypothetical protein, conserved
EAH_00023730	5	0.28	0.24	1.27	0.19	0.24	0.65	0.37	na	na	na	0.43	1.69	0.25	0.19	0.56	0.34	0.44	1.68	0.26	hypothetical protein, conserved
EAH_00022990	4	0.28	na	na	na	0.3	1.16	0.26	na	na	na	0.5	1.83	0.27	0.26	0.81	0.32	0.39	1.58	0.25	hypothetical protein, conserved
EAH_00022590	4	0.28	0.19	0.76	0.25	0.2	0.5	0.41	0.18	0.72	0.25	NaN	NaN	NaN	0.21	0.95	0.22	NaN	NaN	NaN	hypothetical protein, conserved
EAH_00022200	3	0.28	NaN	NaN	NaN	0.29	1.88	0.15	0.25	1.55	0.16	NaN	NaN	NaN	0.76	1.46	0.52	NaN	NaN	NaN	kelch motif domain-containing protein, putative
EAH_00022170	6	0.28	0.29	1.04	0.28	0.36	1.41	0.25	0.36	1.16	0.31	0.51	2.12	0.24	0.54	1.47	0.36	0.48	2.21	0.22	hypothetical protein, conserved
EAH_00021320	1	0.28	0.55	1.91	0.28	NaN	NaN	NaN	na	na	na	NaN	NaN	NaN	na	na	na	na	na	na	hypothetical protein, conserved
EAH_00020600	2	0.28	NaN	NaN	NaN	0.39	1.31	0.3	na	na	na	na	na	na	0.29	1.11	0.26	na	na	na	hypothetical protein, conserved
EAH_00020390	6	0.28	0.45	2.05	0.22	0.29	1.91	0.15	0.42	1.16	0.36	0.43	1.88	0.23	0.6	1.32	0.46	0.5	1.8	0.28	hypothetical protein, conserved
EAH_00019590	5	0.28	0.22	1.02	0.22	0.38	1.05	0.36	0.32	0.92	0.35	0.27	1.63	0.17	0.4	1.34	0.3	na	na	na	hypothetical protein, conserved
EAH_00019570	5	0.28	0.48	1.43	0.33	0.56	2.26	0.25	na	na	na	0.61	1.92	0.32	0.6	3.57	0.17	0.49	1.43	0.34	hypothetical protein, conserved
EAH_00018560	2	0.28	na	na	na	na	na	na	na	na	na	0.33	1.29	0.26	na	na	na	0.32	1.08	0.3	hypothetical protein, conserved
EAH_00018030	1	0.28	na	na	na	NaN	NaN	NaN	na	na	na	0.5	1.82	0.28	na	na	na	na	na	na	soluble liver antigen/liver pancreas antigen domain-containing protein, putative
EAH_00016580	4	0.28	0.5	2.12	0.24	0.41	1.94	0.21	0.44	1.36	0.32	na	na	na	0.43	1.29	0.34	na	na	na	hypothetical protein, conserved
EAH_00016360	2	0.28	0.34	1.4	0.24	0.24	0.77	0.31	na	na	na	na	na	na	na	na	na	na	na	na	hypothetical protein, conserved
EAH_00016120	2	0.28	na	na	na	na	na	na	0.25	0.81	0.3	na	na	na	0.13	0.53	0.25	na	na	na	hypothetical protein, conserved
EAH_00015670	2	0.28	na	na	na	NaN	NaN	NaN	0.1	1.18	0.09	NaN	NaN	NaN	na	na	na	0.85	1.77	0.48	malate:quinone oxidoreductase, putative
EAH_00015630	5	0.28	0.38	1.75	0.22	0.39	0.95	0.41	0.29	0.95	0.3	0.6	2.94	0.2	0.28	0.98	0.28	NaN	NaN	NaN	hypothetical protein, conserved
EAH_00015270	6	0.28	0.26	0.72	0.36	0.23	0.98	0.23	0.26	0.77	0.34	0.29	1.52	0.19	0.21	0.58	0.36	0.28	1.38	0.2	hypothetical protein, conserved
EAH_00014720	6	0.28	0.22	0.72	0.31	0.21	0.7	0.31	0.2	0.71	0.28	0.36	1.56	0.23	0.16	0.57	0.29	0.36	1.47	0.25	hypothetical protein, conserved
EAH_00014010	2	0.28	0.19	0.61	0.32	0.13	0.53	0.25	na	na	na	na	na	na	na	na	na	na	na	na	tubulin epsilon chain, putative
EAH_00013470	2	0.28	na	na	na	0.3	1.27	0.24	na	na	na	na	na	na	na	na	na	0.67	2.06	0.32	autophagy protein APG9, putative
EAH_00013130	3	0.28	0.31	1.52	0.21	na	na	na	0.34	1.09	0.31	NaN	NaN	NaN	0.46	1.4	0.33	NaN	NaN	NaN	protein kinase, putative
EAH_00012220	3	0.28	0.33	1.15	0.28	0.36	1.34	0.27	0.38	1.36	0.28	na	na	na	na	na	na	NaN	NaN	NaN	SRS47A, putative
EAH_00012150	4	0.28	na	na	na	0.45	1.01	0.44	na	na	na	0.26	2.38	0.11	0.49	0.95	0.51	0.23	3.37	0.07	hypothetical protein, conserved
EAH_00011920	4	0.28	0.57	2.17	0.26	0.48	1.42	0.34	0.5	1.74	0.29	na	na	na	0.51	2.35	0.22	na	na	na	hypothetical protein, conserved
EAH_00011870	6	0.28	0.16	0.61	0.26	0.17	0.64	0.27	0.17	0.53	0.32	0.45	1.68	0.27	0.17	0.53	0.33	0.43	1.8	0.24	isoleucyl-tRNA synthetase, putative
EAH_00010830	6	0.28	0.19	0.61	0.31	0.22	0.61	0.37	0.16	0.47	0.34	0.28	1.49	0.19	0.14	0.51	0.27	0.29	1.35	0.21	hypothetical protein, conserved
EAH_00010630	4	0.28	0.5	2.13	0.23	0.46	1.14	0.41	0.27	2.83	0.1	na	na	na	0.43	1.15	0.38	na	na	na	hypothetical protein, conserved
EAH_00009330	6	0.28	0.66	2.17	0.3	0.23	0.77	0.3	0.24	0.77	0.31	0.31	2.29	0.14	0.71	1.45	0.49	0.3	1.97	0.15	hypothetical protein, conserved
EAH_00009050	4	0.28	0.56	2.63	0.21	0.32	1.24	0.26	0.36	1.17	0.31	na	na	na	0.44	1.35	0.33	NaN	NaN	NaN	zinc finger (C3HC4 type) / FHA domain-containing protein, putative
EAH_00008750	6	0.28	0.18	0.57	0.32	0.24	0.65	0.37	0.16	0.53	0.31	0.33	1.87	0.18	0.17	0.54	0.31	0.31	1.78	0.18	hypothetical protein, conserved
EAH_00008320	6	0.28	0.23	1	0.23	0.32	0.74	0.44	0.33	0.76	0.43	0.31	2.18	0.14	0.2	0.62	0.33	0.3	2.02	0.15	hypothetical protein, conserved
EAH_00008140	6	0.28	0.28	1.11	0.25	0.22	0.82	0.27	0.13	0.72	0.18	0.36	1.1	0.32	0.18	0.65	0.27	0.39	0.98	0.4	hypothetical protein, conserved
EAH_00008050	1	0.28	na	na	na	na	na	na	na	na	na	0.53	1.93	0.28	na	na	na	NaN	NaN	NaN	hypothetical protein, conserved
EAH_00007370	2	0.28	na	na	na	na	na	na	na	na	na	0.37	1.27	0.29	na	na	na	0.35	1.28	0.27	hypothetical protein, conserved
EAH_00007140	6	0.28	0.17	0.51	0.34	0.2	0.61	0.32	0.14	0.54	0.26	0.33	1.28	0.25	0.14	0.5	0.28	0.34	1.42	0.24	dual specificity protein phosphatase, catalytic domain-containing protein, putative
EAH_00007110	6	0.28	0.15	0.47	0.33	0.19	0.55	0.34	0.16	0.49	0.32	0.27	1.46	0.18	0.15	0.42	0.34	0.28	1.48	0.19	hypothetical protein, conserved
EAH_00006840	4	0.28	0.36	1.51	0.24	0.25	0.88	0.29	na	na	na	0.35	1.16	0.3	na	na	na	0.29	1.07	0.28	hypothetical protein, conserved
EAH_00006370	4	0.28	0.21	0.66	0.31	0.21	0.75	0.28	0.16	0.72	0.22	NaN	NaN	NaN	0.19	0.61	0.31	NaN	NaN	NaN	mitochondrial import inner membrane translocase subunit Tim17 domain-contraining protein, putative
EAH_00005730	5	0.28	0.2	0.8	0.25	0.16	0.63	0.25	0.28	0.71	0.39	0.27	1.11	0.24	na	na	na	0.29	1.04	0.28	hypothetical protein, conserved
EAH_00005720	3	0.28	0.2	0.85	0.24	0.28	0.74	0.38	0.24	1.12	0.21	na	na	na	na	na	na	na	na	na	hypothetical protein, conserved
EAH_00005210	3	0.28	0.23	0.93	0.24	na	na	na	0.23	0.71	0.32	na	na	na	0.18	0.64	0.28	na	na	na	MORN repeat-containing protein (EC 2.4.1.5), related
EAH_00004680	6	0.28	0.18	0.7	0.26	0.24	0.67	0.36	0.17	0.65	0.27	0.55	2.06	0.27	0.19	0.79	0.24	0.58	2.01	0.29	zinc finger (C3HC4 RING finger) protein, putative
EAH_00004070	4	0.28	0.24	1.05	0.23	0.35	1.11	0.32	na	na	na	na	na	na	0.46	1.06	0.44	0.39	3.26	0.12	hypothetical protein, conserved
EAH_00003560	6	0.28	0.32	0.97	0.33	0.32	1.1	0.29	0.24	0.9	0.26	0.39	1.56	0.25	0.34	0.98	0.35	0.34	1.75	0.2	hypothetical protein, conserved
EAH_00002390	5	0.28	0.19	0.64	0.29	0.19	0.61	0.31	0.19	0.64	0.3	0.42	1.56	0.27	na	na	na	0.4	1.63	0.24	hypothetical protein, conserved
EAH_00000890	6	0.28	0.17	0.54	0.32	0.21	0.66	0.32	0.16	0.48	0.33	0.38	1.86	0.2	0.16	0.53	0.31	0.33	1.85	0.18	hypothetical protein, conserved
EAH_00000630	6	0.28	0.22	0.64	0.35	0.16	0.59	0.27	0.24	0.49	0.49	0.36	3.53	0.1	0.2	0.73	0.28	0.36	1.9	0.19	hypothetical protein, conserved
EAH_00000130	6	0.28	0.15	0.54	0.27	0.19	0.6	0.31	0.15	0.54	0.28	0.3	1.35	0.22	0.15	0.45	0.34	0.3	1.37	0.22	DNA repair protein, putative
EAH_00066590	5	0.27	na	na	na	0.21	0.75	0.28	0.19	0.65	0.3	0.49	2.2	0.22	0.32	1.05	0.3	0.49	2.07	0.24	hypothetical protein, conserved
EAH_00063950	6	0.27	0.25	1.1	0.22	0.31	1.12	0.28	0.38	1.69	0.23	0.42	1.16	0.37	0.37	1.37	0.27	0.43	1.82	0.23	hypothetical protein, conserved
EAH_00063150	2	0.27	0.49	1.5	0.33	na	na	na	na	na	na	NaN	NaN	NaN	0.43	2.03	0.21	na	na	na	hypothetical protein, conserved
EAH_00061710	1	0.27	0.17	0.63	0.27	na	na	na	na	na	na	na	na	na	na	na	na	na	na	na	hypothetical protein, conserved
EAH_00061390	6	0.27	0.21	0.83	0.26	0.23	0.83	0.28	0.29	0.83	0.34	0.3	1.65	0.18	0.37	0.9	0.41	0.26	1.65	0.16	hypothetical protein, conserved
EAH_00061210	3	0.27	0.38	1.24	0.3	0.34	1.33	0.25	0.48	1.83	0.26	na	na	na	na	na	na	na	na	na	hypothetical protein, conserved
EAH_00060980	1	0.27	na	na	na	na	na	na	na	na	na	0.78	2.94	0.27	na	na	na	NaN	NaN	NaN	glutamine synthetase, putative
EAH_00059800	6	0.27	0.22	0.83	0.26	0.36	1.02	0.36	0.35	1.34	0.26	0.38	2.28	0.16	0.42	1.29	0.33	0.39	1.52	0.26	hypothetical protein, conserved
EAH_00059210	2	0.27	na	na	na	0.48	2.14	0.22	na	na	na	na	na	na	0.49	1.58	0.31	na	na	na	hypothetical protein, conserved
EAH_00058530	5	0.27	0.4	2.31	0.17	0.66	3.71	0.18	0.45	0.95	0.48	NaN	NaN	NaN	0.38	1.26	0.3	0.51	2.54	0.2	hypothetical protein, conserved
EAH_00056170	1	0.27	na	na	na	na	na	na	na	na	na	0.36	1.35	0.27	na	na	na	na	na	na	Serine/threonine-protein phosphatase (EC 3.1.3.16), related
EAH_00056060	4	0.27	0.26	1.55	0.16	0.32	1.11	0.29	0.45	1.3	0.34	na	na	na	0.37	1.41	0.26	na	na	na	transmembrane protein, putative
EAH_00052440	5	0.27	0.41	1.78	0.23	0.39	1.18	0.33	0.32	1.27	0.25	0.55	2.7	0.2	na	na	na	0.69	2.19	0.32	hypothetical protein, conserved
EAH_00052190	3	0.27	0.17	1.68	0.1	na	na	na	0.25	0.76	0.33	0.53	1.4	0.38	na	na	na	na	na	na	B-box zinc finger protein, putative
EAH_00052070	5	0.27	0.2	0.56	0.35	0.22	0.74	0.29	na	na	na	0.34	1.48	0.23	0.16	0.63	0.25	0.34	1.47	0.23	hypothetical protein, conserved
EAH_00051220	3	0.27	0.28	1.25	0.23	na	na	na	0.35	0.9	0.39	na	na	na	0.4	1.96	0.2	na	na	na	hypothetical protein, conserved
EAH_00050900	5	0.27	na	na	na	0.29	1.1	0.27	0.34	1.16	0.29	0.4	1.57	0.26	0.32	1.02	0.32	0.37	1.53	0.24	tRNA synthetase, putative
EAH_00050730	4	0.27	0.19	0.78	0.24	0.23	0.8	0.29	0.16	0.61	0.26	NaN	NaN	NaN	0.18	0.64	0.28	NaN	NaN	NaN	hypothetical protein, conserved
EAH_00049870	3	0.27	0.37	1.95	0.19	na	na	na	na	na	na	0.94	2.95	0.32	na	na	na	0.4	1.38	0.29	hypothetical protein, conserved
EAH_00048480	5	0.27	na	na	na	0.25	1.01	0.24	0.22	0.82	0.28	0.44	1.37	0.32	0.22	0.78	0.28	0.35	1.54	0.23	hypothetical protein, conserved
EAH_00048280	3	0.27	na	na	na	0.31	1.7	0.18	0.47	1.01	0.46	na	na	na	0.27	1.54	0.17	na	na	na	hypothetical protein, conserved
EAH_00047560	3	0.27	0.27	1.01	0.26	na	na	na	na	na	na	na	na	na	0.31	0.98	0.32	0.34	1.47	0.23	hypothetical protein, conserved
EAH_00045700	3	0.27	na	na	na	na	na	na	0.39	1.56	0.25	0.58	2.14	0.27	na	na	na	0.43	1.56	0.27	hypothetical protein, conserved
EAH_00045480	4	0.27	0.47	1.74	0.27	0.55	1.67	0.33	0.63	1.81	0.35	0.6	4.5	0.13	NaN	NaN	NaN	NaN	NaN	NaN	hypothetical protein, conserved
EAH_00045260	5	0.27	na	na	na	0.18	1.61	0.11	0.24	0.81	0.29	0.33	1.57	0.21	0.35	0.86	0.41	0.35	1.19	0.3	hypothetical protein, conserved
EAH_00043480	6	0.27	0.18	0.71	0.25	0.17	0.78	0.22	0.23	0.64	0.36	0.3	1.11	0.27	0.26	0.9	0.29	0.23	1.12	0.2	hypothetical protein, conserved
EAH_00042320	5	0.27	0.29	1.14	0.26	0.32	1.09	0.29	0.24	0.98	0.25	0.36	1.25	0.28	na	na	na	0.34	1.25	0.27	hypothetical protein, conserved
EAH_00041960	5	0.27	0.19	0.74	0.26	0.22	0.72	0.3	0.23	0.79	0.29	0.38	1.39	0.27	0.25	1.14	0.22	na	na	na	hypothetical protein, conserved
EAH_00040960	3	0.27	0.48	1.3	0.37	0.46	1.81	0.26	na	na	na	NaN	NaN	NaN	na	na	na	0.78	4.4	0.18	hypothetical protein, conserved
EAH_00039880	6	0.27	0.22	0.74	0.3	0.2	0.69	0.29	0.27	0.75	0.36	0.42	1.96	0.21	0.18	0.69	0.26	0.41	1.95	0.21	hypothetical protein, conserved
EAH_00039300	3	0.27	0.4	1.18	0.34	na	na	na	0.24	0.65	0.36	NaN	NaN	NaN	0.15	1.29	0.12	NaN	NaN	NaN	hypothetical protein, conserved
EAH_00038660	5	0.27	0.31	0.93	0.33	0.41	1.52	0.27	0.44	1.66	0.27	0.37	1.95	0.19	0.44	1.46	0.3	na	na	na	hypothetical protein, conserved
EAH_00038440	5	0.27	0.41	1.51	0.27	0.39	1.31	0.3	0.29	1.62	0.18	0.34	1.27	0.27	0.48	1.36	0.36	na	na	na	hypothetical protein, conserved
EAH_00038200	6	0.27	0.25	0.83	0.31	0.34	0.99	0.34	0.18	1.13	0.16	0.33	1.76	0.19	0.5	1.47	0.34	0.47	1.8	0.26	hypothetical protein, conserved
EAH_00037850	1	0.27	na	na	na	na	na	na	0.34	1.27	0.27	na	na	na	na	na	na	na	na	na	cGMP-inhibited 3',5'-cyclic phosphodiesterase, putative
EAH_00037740	6	0.27	0.57	2.36	0.24	0.31	1.71	0.18	0.24	1.55	0.15	0.38	1.49	0.26	0.48	0.86	0.56	0.43	2.12	0.2	hypothetical protein, conserved
EAH_00037550	1	0.27	0.26	0.97	0.27	na	na	na	na	na	na	na	na	na	na	na	na	na	na	na	hypothetical protein, conserved
EAH_00037060	6	0.27	0.76	1.67	0.46	0.34	1.18	0.29	0.27	1.07	0.25	0.47	4.49	0.1	0.38	1.13	0.34	0.46	2.46	0.19	hypothetical protein, conserved
EAH_00036460	4	0.27	0.26	1.31	0.19	0.32	1.25	0.26	na	na	na	na	na	na	0.28	1.05	0.26	0.43	1.18	0.36	zinc finger (C3HC4 type RING finger) protein, putative
EAH_00036340	4	0.27	0.19	0.59	0.32	0.5	1.54	0.33	0.3	1.07	0.28	0.25	1.68	0.15	na	na	na	na	na	na	hypothetical protein, conserved
EAH_00035790	3	0.27	0.2	0.95	0.21	0.23	0.8	0.29	na	na	na	na	na	na	0.18	0.6	0.3	na	na	na	WD domain, G-beta repeat-containing protein, putative
EAH_00034970	4	0.27	0.23	0.92	0.25	na	na	na	0.29	1.07	0.27	0.36	1.16	0.31	na	na	na	0.32	1.16	0.28	hypothetical protein, conserved
EAH_00034890	4	0.27	0.34	0.91	0.37	0.47	1.57	0.3	0.2	0.71	0.28	na	na	na	na	na	na	0.45	3.06	0.15	mitochondrial carrier domain-containing protein, putative
EAH_00034850	3	0.27	0.49	1.78	0.28	na	na	na	na	na	na	0.51	1.86	0.27	na	na	na	0.52	2.05	0.26	hypothetical protein, conserved
EAH_00034320	6	0.27	0.23	1.38	0.16	0.29	1.42	0.2	0.22	1.02	0.22	0.37	1.76	0.21	0.5	0.87	0.57	0.45	1.84	0.25	hypothetical protein, conserved
EAH_00033720	6	0.27	0.14	0.55	0.25	0.15	0.57	0.26	0.13	0.43	0.3	0.32	1.32	0.24	0.15	0.48	0.32	0.3	1.32	0.23	hypothetical protein, conserved
EAH_00033600	5	0.27	0.13	0.79	0.17	0.21	0.63	0.33	na	na	na	0.34	1.41	0.24	0.21	0.65	0.33	0.33	1.16	0.28	hypothetical protein, conserved
EAH_00033570	6	0.27	0.22	0.66	0.34	0.15	0.48	0.31	0.19	0.79	0.25	0.27	1.24	0.21	0.15	0.5	0.3	0.29	1.28	0.22	hypothetical protein, conserved
EAH_00033040	6	0.27	0.38	0.9	0.43	0.27	1.08	0.25	0.25	0.92	0.27	0.46	2.21	0.21	0.29	1.24	0.23	0.48	2.05	0.24	hypothetical protein, conserved
EAH_00032020	5	0.27	0.22	0.7	0.32	0.25	0.84	0.29	na	na	na	0.33	1.23	0.27	0.17	0.73	0.24	0.31	1.48	0.21	hypothetical protein, conserved
EAH_00031100	2	0.27	0.16	2.02	0.08	na	na	na	na	na	na	1.03	2.23	0.46	na	na	na	na	na	na	actin-like protein 7, putative
EAH_00030690	4	0.27	0.17	0.67	0.25	0.26	1.07	0.25	na	na	na	na	na	na	0.27	0.87	0.3	0.29	1.01	0.28	hypothetical protein, conserved
EAH_00029460	4	0.27	0.36	1.29	0.28	0.47	1.21	0.39	0.15	3.09	0.05	NaN	NaN	NaN	0.32	0.84	0.38	na	na	na	hypothetical protein, conserved
EAH_00029410	6	0.27	0.23	0.79	0.29	0.26	0.7	0.37	0.24	0.84	0.29	0.43	1.84	0.23	0.21	1.14	0.18	0.42	1.58	0.27	hypothetical protein, conserved
EAH_00027960	3	0.27	na	na	na	na	na	na	0.2	0.6	0.34	0.28	1.37	0.21	na	na	na	0.41	1.58	0.26	hypothetical protein, conserved
EAH_00027230	4	0.27	0.23	1.22	0.19	0.38	1.23	0.31	0.3	1.24	0.24	na	na	na	0.47	1.32	0.35	na	na	na	hypothetical protein, conserved
EAH_00026250	5	0.27	0.47	1.87	0.25	0.38	1.12	0.34	na	na	na	0.43	1.75	0.25	0.39	2.03	0.19	0.55	1.66	0.33	hypothetical protein, conserved
EAH_00025990	5	0.27	0.32	1.2	0.27	0.41	1.39	0.3	na	na	na	0.48	2.17	0.22	0.44	1.32	0.33	0.49	1.89	0.26	hypothetical protein, conserved
EAH_00024390	5	0.27	0.36	1.1	0.33	0.37	1.17	0.32	na	na	na	0.53	2.18	0.24	0.42	2.24	0.19	0.51	2.02	0.25	hypothetical protein, conserved
EAH_00024010	6	0.27	0.33	0.88	0.37	0.26	1.06	0.24	0.28	0.95	0.3	0.46	1.83	0.25	0.26	1.06	0.24	0.44	2.06	0.21	CAM kinase, SNF1 family, putative
EAH_00023790	6	0.27	0.13	0.63	0.21	0.17	0.56	0.3	0.15	0.54	0.28	0.31	1.33	0.23	0.15	0.5	0.31	0.31	1.21	0.26	WD-repeat protein, putative
EAH_00023770	5	0.27	0.17	0.46	0.36	0.15	0.64	0.23	na	na	na	0.46	1.89	0.25	0.13	0.51	0.26	0.49	1.93	0.25	hypothetical protein, conserved
EAH_00022760	5	0.27	0.31	1.13	0.27	0.21	1.32	0.16	0.26	1.63	0.16	na	na	na	0.4	1.4	0.29	0.49	1.09	0.45	hypothetical protein, conserved
EAH_00020910	2	0.27	NaN	NaN	NaN	na	na	na	na	na	na	0.71	2.25	0.32	0.39	1.77	0.22	na	na	na	hypothetical protein, conserved
EAH_00020780	4	0.27	0.22	0.71	0.31	0.23	0.89	0.26	0.2	0.79	0.25	na	na	na	0.33	1.26	0.26	na	na	na	hypothetical protein, conserved
EAH_00020660	6	0.27	0.16	0.53	0.3	0.17	0.54	0.32	0.14	0.44	0.31	0.26	1.29	0.21	0.15	0.55	0.27	0.28	1.35	0.21	hypothetical protein, conserved
EAH_00019960	6	0.27	0.3	0.67	0.45	0.45	1.86	0.24	0.32	0.76	0.42	0.24	1.56	0.15	0.27	1.31	0.21	0.26	1.48	0.17	peptide chain release factor 1, putative
EAH_00019040	6	0.27	0.18	0.66	0.26	0.19	0.64	0.3	0.18	0.59	0.3	0.36	1.73	0.21	0.2	0.54	0.37	0.36	1.89	0.19	hypothetical protein, conserved
EAH_00018080	4	0.27	0.3	1.06	0.29	0.3	1.29	0.23	na	na	na	0.32	1.32	0.24	na	na	na	0.28	0.9	0.31	hypothetical protein, conserved
EAH_00018020	3	0.27	0.29	1.27	0.23	0.47	1.63	0.29	0.46	1.52	0.3	na	na	na	na	na	na	na	na	na	hypothetical protein, conserved
EAH_00017810	4	0.27	0.26	0.87	0.3	0.28	1.15	0.25	na	na	na	0.47	1.64	0.29	na	na	na	0.43	1.78	0.24	hypothetical protein, conserved
EAH_00017690	2	0.27	0.45	1.98	0.23	0.4	1.27	0.31	na	na	na	na	na	na	na	na	na	na	na	na	hypothetical protein, conserved
EAH_00017520	5	0.27	0.3	1.06	0.28	0.21	0.82	0.26	na	na	na	0.43	1.44	0.3	0.24	0.95	0.25	0.41	1.54	0.27	hypothetical protein, conserved
EAH_00017130	6	0.27	0.17	0.66	0.26	0.26	0.85	0.3	0.23	0.73	0.31	0.41	1.75	0.23	0.3	0.89	0.34	0.38	2.12	0.18	hypothetical protein, conserved
EAH_00017060	4	0.27	0.23	0.71	0.33	NaN	NaN	NaN	0.11	0.61	0.18	0.26	0.92	0.29	na	na	na	0.28	0.98	0.28	TBC domain-containing protein, putative
EAH_00016630	6	0.27	0.13	0.91	0.15	0.19	0.73	0.26	0.27	1.22	0.22	0.46	1.34	0.35	0.18	0.75	0.24	0.44	1.16	0.38	hypothetical protein, conserved
EAH_00016200	6	0.27	0.25	0.69	0.36	0.32	1.11	0.29	0.23	0.67	0.34	0.51	3.09	0.17	0.26	0.7	0.37	0.56	5.23	0.11	hypothetical protein, conserved
EAH_00016140	3	0.27	0.29	0.99	0.29	na	na	na	0.3	0.8	0.38	na	na	na	na	na	na	0.46	3.24	0.14	hypothetical protein, conserved
EAH_00015090	2	0.27	na	na	na	na	na	na	na	na	na	0.39	1.48	0.27	na	na	na	0.43	1.57	0.27	sag
EAH_00014940	3	0.27	0.13	0.58	0.23	0.19	0.71	0.27	na	na	na	na	na	na	0.17	0.55	0.31	na	na	na	hypothetical protein, conserved
EAH_00014690	5	0.27	0.3	1.71	0.18	0.24	0.8	0.3	na	na	na	0.46	1.74	0.26	0.2	0.62	0.33	0.48	1.85	0.26	hypothetical protein, conserved
EAH_00014000	4	0.27	0.19	0.8	0.24	na	na	na	0.3	0.8	0.38	0.21	1.3	0.16	0.16	0.55	0.29	na	na	na	NEK kinase, putative
EAH_00013270	6	0.27	0.22	0.87	0.25	0.23	0.78	0.3	0.34	0.89	0.38	0.4	1.47	0.27	0.18	0.84	0.21	0.41	1.83	0.23	hypothetical protein, conserved
EAH_00012920	4	0.27	0.22	0.78	0.28	0.19	0.92	0.2	0.22	0.67	0.34	na	na	na	0.19	0.69	0.27	na	na	na	hypothetical protein, conserved
EAH_00012540	2	0.27	0.51	1.95	0.26	0.52	1.89	0.27	na	na	na	na	na	na	na	na	na	na	na	na	hypothetical protein, conserved
EAH_00012310	5	0.27	0.19	0.71	0.26	0.15	0.65	0.24	na	na	na	0.46	1.87	0.24	0.19	0.6	0.31	0.48	1.62	0.3	hypothetical protein, conserved
EAH_00012200	5	0.27	0.19	0.79	0.25	0.18	0.71	0.26	na	na	na	0.38	1.51	0.25	0.19	0.7	0.27	0.4	1.18	0.34	elongation factor TS, putative
EAH_00011890	6	0.27	0.18	0.65	0.28	0.2	0.69	0.29	0.15	0.54	0.28	0.31	1.45	0.21	0.16	0.47	0.34	0.33	1.6	0.21	OTU-like cysteine protease domain-containing protein, putative
EAH_00011470	5	0.27	0.19	0.82	0.23	0.25	1	0.25	0.27	0.9	0.3	0.33	1.13	0.29	na	na	na	0.31	1.16	0.27	hypothetical protein, conserved
EAH_00010960	4	0.27	0.26	1.3	0.2	0.32	1.06	0.3	0.31	1.08	0.29	0.4	1.35	0.3	na	na	na	na	na	na	hypothetical protein, conserved
EAH_00010690	4	0.27	0.32	0.9	0.36	0.25	0.91	0.28	na	na	na	0.48	2.21	0.22	na	na	na	0.49	2.07	0.24	hypothetical protein, conserved
EAH_00010650	3	0.27	0.39	1.79	0.22	0.35	1.81	0.19	NaN	NaN	NaN	na	na	na	0.23	0.58	0.41	na	na	na	hypothetical protein, conserved
EAH_00010240	6	0.27	0.19	0.68	0.28	0.2	0.6	0.33	0.19	0.75	0.25	0.34	1.82	0.19	0.23	0.62	0.38	0.36	2.02	0.18	hypothetical protein, conserved
EAH_00008760	6	0.27	0.19	0.65	0.29	0.23	0.95	0.25	0.16	0.62	0.26	0.37	1.19	0.31	0.18	0.75	0.24	0.37	1.26	0.3	hypothetical protein, conserved
EAH_00008700	6	0.27	0.33	0.84	0.4	0.76	3.76	0.2	0.19	0.66	0.28	0.51	2.22	0.23	0.14	0.58	0.24	0.4	1.59	0.25	Peptidyl-tRNA hydrolase II, related
EAH_00008540	5	0.27	0.24	0.74	0.33	0.29	0.96	0.3	0.25	0.96	0.26	0.38	2.39	0.16	0.28	0.9	0.32	NaN	NaN	NaN	hypothetical protein, conserved
EAH_00006710	1	0.27	na	na	na	NaN	NaN	NaN	1.12	4.16	0.27	na	na	na	na	na	na	na	na	na	hypothetical protein, conserved
EAH_00006660	6	0.27	0.16	0.59	0.28	0.2	0.75	0.27	0.17	0.63	0.27	0.3	1.42	0.21	0.18	0.53	0.34	0.32	1.33	0.24	hypothetical protein, conserved
EAH_00006240	6	0.27	0.48	1.22	0.39	0.2	1.32	0.15	0.17	0.8	0.22	0.39	1.24	0.31	0.29	1.31	0.22	0.37	1.22	0.3	hypothetical protein, conserved
EAH_00004480	4	0.27	0.3	0.85	0.35	0.24	0.84	0.28	na	na	na	0.46	1.84	0.25	na	na	na	0.49	2.75	0.18	hypothetical protein, conserved
EAH_00003380	5	0.27	0.19	0.64	0.3	0.35	1.02	0.35	na	na	na	0.33	1.8	0.19	0.34	0.99	0.34	0.33	2.06	0.16	hypothetical protein, conserved
EAH_00001210	1	0.27	na	na	na	na	na	na	na	na	na	NaN	NaN	NaN	na	na	na	0.71	2.65	0.27	serine proteinase inhibitor TgPI-2, putative
EAH_00001060	2	0.27	na	na	na	na	na	na	na	na	na	0.53	1.79	0.29	na	na	na	0.37	1.46	0.25	hypothetical protein, conserved
EAH_00000880	6	0.27	0.18	0.55	0.33	0.19	0.8	0.24	0.18	0.58	0.32	0.46	1.64	0.28	0.13	0.57	0.23	0.41	1.84	0.22	hypothetical protein, conserved
EAH_00000800	1	0.27	na	na	na	0.46	1.67	0.27	na	na	na	na	na	na	na	na	na	na	na	na	hypothetical protein, conserved
EAH_00000580	5	0.27	0.19	0.68	0.29	0.21	0.64	0.33	na	na	na	0.34	1.46	0.23	0.18	0.65	0.28	0.34	1.47	0.23	hypothetical protein, conserved
EAH_00064870	4	0.26	na	na	na	na	na	na	0.26	1.1	0.23	0.35	0.84	0.41	0.18	1.32	0.14	0.26	1.02	0.26	3' exoribonuclease family, domain 1 containing protein, putative
EAH_00063420	4	0.26	1.06	2.38	0.45	NaN	NaN	NaN	0.29	1.18	0.25	0.4	1.73	0.23	na	na	na	0.18	1.52	0.12	aspartate aminotransferase, putative
EAH_00061660	6	0.26	0.34	1.24	0.28	0.29	0.61	0.48	0.23	1.46	0.16	0.31	1.6	0.2	0.51	2.12	0.24	0.36	1.68	0.22	hypothetical protein, conserved
EAH_00061450	4	0.26	0.25	1.4	0.18	0.4	1.74	0.23	0.6	1.42	0.42	na	na	na	0.33	1.71	0.19	na	na	na	hypothetical protein, conserved
EAH_00061300	3	0.26	0.52	2.24	0.23	na	na	na	0.43	1.28	0.34	na	na	na	0.32	1.45	0.22	na	na	na	hypothetical protein, conserved
EAH_00061050	4	0.26	0.29	0.78	0.37	na	na	na	0.24	1	0.24	0.23	1.47	0.16	na	na	na	0.26	0.98	0.27	hypothetical protein, conserved
EAH_00060540	1	0.26	na	na	na	na	na	na	na	na	na	0.94	3.64	0.26	na	na	na	NaN	NaN	NaN	Calcium/calmodulin-dependent 3',5'-cyclic nucleotide phosphodiesterase, related
EAH_00060420	2	0.26	0.38	1.77	0.21	0.39	1.32	0.3	na	na	na	NaN	NaN	NaN	na	na	na	NaN	NaN	NaN	hypothetical protein, conserved
EAH_00059700	1	0.26	NaN	NaN	NaN	NaN	NaN	NaN	0.54	2.11	0.26	NaN	NaN	NaN	na	na	na	NaN	NaN	NaN	hypothetical protein, conserved
EAH_00059540	3	0.26	0.26	1.55	0.17	0.4	0.91	0.44	0.31	1.97	0.16	na	na	na	NaN	NaN	NaN	na	na	na	hypothetical protein, conserved
EAH_00058780	3	0.26	na	na	na	0.16	0.85	0.18	0.43	1.37	0.32	na	na	na	0.38	1.42	0.27	na	na	na	hypothetical protein, conserved
EAH_00058110	3	0.26	0.35	1.21	0.28	0.29	1.44	0.2	na	na	na	NaN	NaN	NaN	0.39	1.35	0.29	na	na	na	hypothetical protein, conserved
EAH_00057520	6	0.26	0.34	1.29	0.27	0.23	1.22	0.19	0.31	0.71	0.44	0.27	1.51	0.18	0.29	0.97	0.3	0.28	1.65	0.17	hypothetical protein, conserved
EAH_00057040	3	0.26	0.19	1.31	0.15	na	na	na	0.43	1.13	0.38	0.61	2.46	0.25	na	na	na	na	na	na	hypothetical protein, conserved
EAH_00056440	2	0.26	na	na	na	na	na	na	na	na	na	0.36	1.36	0.26	na	na	na	0.42	1.63	0.26	hypothetical protein, conserved
EAH_00056260	4	0.26	0.24	0.95	0.25	na	na	na	0.3	1.15	0.27	0.39	1.53	0.26	na	na	na	0.45	1.61	0.28	hypothetical protein, conserved
EAH_00055950	4	0.26	na	na	na	0.43	1.3	0.33	0.19	1.21	0.16	0.42	1.78	0.23	0.44	1.46	0.3	na	na	na	hypothetical protein, conserved
EAH_00055910	6	0.26	0.2	1.36	0.14	0.34	1.24	0.28	0.4	1.24	0.32	0.36	1.78	0.2	0.36	1.03	0.35	0.45	1.6	0.28	hypothetical protein, conserved
EAH_00055890	6	0.26	0.21	1.21	0.17	0.34	1.78	0.19	1	1.3	0.77	0.29	4.37	0.07	0.35	1.48	0.24	0.3	2.45	0.12	HIT zinc finger domain-containing protein, putative
EAH_00055780	5	0.26	0.24	0.97	0.25	0.28	1.22	0.23	na	na	na	0.36	1.6	0.23	0.32	0.87	0.37	0.37	1.51	0.24	zinc finger (C3HC4 RING finger) protein, putative
EAH_00054820	1	0.26	0.47	1.85	0.26	na	na	na	na	na	na	na	na	na	na	na	na	na	na	na	hypothetical protein, conserved
EAH_00053650	4	0.26	0.63	0.96	0.65	na	na	na	0.07	0.53	0.13	0.22	1.21	0.18	0.1	1.07	0.09	na	na	na	adenylate kinase, putative
EAH_00052980	2	0.26	na	na	na	0.2	1.26	0.16	0.31	0.84	0.37	NaN	NaN	NaN	na	na	na	NaN	NaN	NaN	hypothetical protein, conserved
EAH_00052910	4	0.26	0.24	0.98	0.25	na	na	na	0.26	0.86	0.3	0.35	1.29	0.27	na	na	na	0.39	1.66	0.23	hypothetical protein, conserved
EAH_00052420	2	0.26	na	na	na	na	na	na	na	na	na	0.58	2.25	0.26	na	na	na	0.55	2.09	0.26	hypothetical protein, conserved
EAH_00052270	2	0.26	NaN	NaN	NaN	0.82	1.69	0.48	0.05	1.44	0.04	NaN	NaN	NaN	na	na	na	NaN	NaN	NaN	ATP synthase beta chain, putative
EAH_00051700	4	0.26	0.54	2.79	0.19	na	na	na	na	na	na	0.49	1.48	0.33	0.5	2.81	0.18	0.52	1.56	0.33	hypothetical protein, conserved
EAH_00051380	6	0.26	0.26	0.77	0.34	0.18	1.11	0.16	0.27	1.01	0.27	0.26	0.97	0.26	0.35	1.17	0.3	0.31	1.23	0.25	hypothetical protein, conserved
EAH_00050650	1	0.26	na	na	na	na	na	na	0.34	1.32	0.26	na	na	na	na	na	na	NaN	NaN	NaN	hypothetical protein, conserved
EAH_00050610	3	0.26	0.51	1.35	0.38	0.27	1.21	0.23	na	na	na	na	na	na	na	na	na	0.37	2.17	0.17	hypothetical protein, conserved
EAH_00050370	3	0.26	0.34	0.91	0.38	0.31	1.74	0.18	0.26	1.18	0.22	NaN	NaN	NaN	na	na	na	NaN	NaN	NaN	hypothetical protein, conserved
EAH_00050310	6	0.26	0.27	1.31	0.21	0.24	1.2	0.2	0.32	1.27	0.26	0.32	1.18	0.27	0.41	1.09	0.38	0.3	1.24	0.24	hypothetical protein, conserved
EAH_00049800	3	0.26	na	na	na	na	na	na	0.12	0.78	0.15	0.4	1.2	0.33	na	na	na	0.34	1.19	0.29	hypothetical protein, conserved
EAH_00049220	3	0.26	0.46	1.86	0.25	na	na	na	0.3	1.61	0.19	NaN	NaN	NaN	0.39	1.12	0.35	NaN	NaN	NaN	hypothetical protein, conserved
EAH_00049180	3	0.26	na	na	na	0.33	1.14	0.29	na	na	na	0.29	1.37	0.22	na	na	na	0.33	1.28	0.26	hypothetical protein, conserved
EAH_00048360	5	0.26	0.21	0.7	0.3	0.43	1.28	0.33	0.34	0.9	0.37	0.29	1.68	0.17	0.42	2.88	0.15	na	na	na	hypothetical protein, conserved
EAH_00048180	1	0.26	NaN	NaN	NaN	NaN	NaN	NaN	na	na	na	0.51	1.98	0.26	NaN	NaN	NaN	NaN	NaN	NaN	hypothetical protein, conserved
EAH_00048050	3	0.26	0.43	1.71	0.25	0.33	1.46	0.23	0.38	1.29	0.3	na	na	na	na	na	na	na	na	na	choline/ethanolamine kinase, putative
EAH_00047870	5	0.26	0.2	0.94	0.22	0.22	1	0.23	na	na	na	0.34	1.16	0.29	0.26	0.87	0.3	0.36	1.46	0.25	zinc finger (C3HC4 RING finger) protein, putative
EAH_00047860	5	0.26	na	na	na	0.3	1.28	0.23	0.83	1.57	0.53	0.52	2.67	0.2	0.27	2.03	0.14	0.48	2.26	0.21	RNA methyltransferase, TrmH family domain-containing protein, putative
EAH_00047480	3	0.26	0.43	1.62	0.26	0.41	1.41	0.29	0.39	1.65	0.24	NaN	NaN	NaN	NaN	NaN	NaN	NaN	NaN	NaN	hypothetical protein, conserved
EAH_00047250	3	0.26	0.31	1.22	0.25	na	na	na	0.36	1.17	0.31	NaN	NaN	NaN	na	na	na	0.5	2.44	0.2	tricarboxylate carrier, putative
EAH_00047230	1	0.26	na	na	na	0.4	1.52	0.26	na	na	na	na	na	na	na	na	na	na	na	na	hypothetical protein, conserved
EAH_00047150	6	0.26	0.25	0.93	0.27	0.25	1.08	0.23	0.26	0.71	0.36	0.24	1.03	0.24	0.22	0.9	0.24	0.24	1.23	0.19	beta-1,4-mannosyltransferase, putative
EAH_00046010	4	0.26	0.19	0.54	0.34	0.25	1.78	0.14	0.26	0.88	0.29	0.35	1.35	0.26	na	na	na	na	na	na	hypothetical protein, conserved
EAH_00045900	3	0.26	0.29	1.11	0.26	na	na	na	0.36	1.27	0.28	NaN	NaN	NaN	0.37	1.46	0.25	na	na	na	ABC1 domain-containing protein, putative
EAH_00045280	1	0.26	na	na	na	na	na	na	0.35	1.35	0.26	na	na	na	na	na	na	na	na	na	nuclease, putative
EAH_00044780	4	0.26	0.16	0.6	0.26	0.28	1.29	0.22	0.17	0.56	0.31	na	na	na	0.19	0.82	0.23	na	na	na	hypothetical protein, conserved
EAH_00043530	5	0.26	0.25	1.16	0.22	0.21	1.17	0.18	0.33	0.82	0.4	0.28	1.13	0.25	na	na	na	0.27	1.14	0.24	hypothetical protein, conserved
EAH_00040030	5	0.26	0.36	1.01	0.35	0.23	0.73	0.31	na	na	na	0.31	1.6	0.19	0.28	1.17	0.24	0.3	1.69	0.18	Peptidase, M20/M25/M40 family protein, related, related
EAH_00038880	4	0.26	0.34	1.72	0.2	0.37	1.19	0.31	0.55	1.8	0.3	0.46	2.18	0.21	na	na	na	NaN	NaN	NaN	hypothetical protein, conserved
EAH_00038060	3	0.26	na	na	na	0.35	1.3	0.27	0.23	0.74	0.3	na	na	na	na	na	na	0.45	2.14	0.21	zinc carboxypeptidase, putative
EAH_00037630	1	0.26	na	na	na	NaN	NaN	NaN	na	na	na	0.76	2.9	0.26	na	na	na	NaN	NaN	NaN	mitochondrial carrier domain-containing protein, putative
EAH_00037040	6	0.26	0.27	1.44	0.19	0.26	1.09	0.24	0.37	1.04	0.36	0.48	1.81	0.26	0.25	0.89	0.28	0.44	1.99	0.22	vacuolar (H+)-ATPase G subunit domain-containing protein, putative
EAH_00036830	4	0.26	0.47	1.64	0.29	0.24	4.87	0.05	0.27	1.17	0.23	na	na	na	na	na	na	0.93	1.98	0.47	hypothetical protein, conserved
EAH_00036420	5	0.26	0.27	1.07	0.25	0.22	1.09	0.2	na	na	na	0.34	1.69	0.2	0.44	0.95	0.46	0.34	1.78	0.19	hypothetical protein, conserved
EAH_00035940	1	0.26	0.34	1.27	0.26	na	na	na	na	na	na	na	na	na	na	na	na	na	na	na	hypothetical protein, conserved
EAH_00034860	5	0.26	0.36	1.07	0.33	0.46	1.47	0.31	na	na	na	0.47	1.9	0.25	0.16	0.92	0.17	0.49	1.96	0.25	hypothetical protein, conserved
EAH_00032350	4	0.26	0.24	0.94	0.26	0.2	0.69	0.29	0.18	0.81	0.22	na	na	na	0.22	0.87	0.26	na	na	na	hypothetical protein, conserved
EAH_00032260	4	0.26	0.19	0.66	0.29	na	na	na	0.13	0.44	0.31	0.25	1.12	0.22	na	na	na	0.22	1.09	0.2	RNA pseudouridylate synthase, putative
EAH_00032240	5	0.26	0.3	2.56	0.12	0.22	0.62	0.35	na	na	na	0.33	1.47	0.23	0.27	0.75	0.36	0.35	1.58	0.22	acyl-CoA-binding protein, putative
EAH_00031680	5	0.26	na	na	na	0.26	1.16	0.23	0.28	0.99	0.28	0.42	1.5	0.28	0.27	0.85	0.32	0.4	2.23	0.18	hypothetical protein, conserved
EAH_00031350	6	0.26	0.32	1.68	0.19	0.2	0.58	0.34	0.26	0.98	0.26	0.39	1.48	0.26	0.16	0.56	0.28	0.37	1.55	0.24	hypothetical protein, conserved
EAH_00031180	3	0.26	0.17	0.7	0.24	0.2	0.8	0.25	na	na	na	0.32	1.09	0.29	na	na	na	na	na	na	hypothetical protein, conserved
EAH_00031150	4	0.26	0.22	0.74	0.29	0.2	0.8	0.25	na	na	na	0.26	1.71	0.15	0.29	0.85	0.34	na	na	na	hypothetical protein, conserved
EAH_00030030	6	0.26	0.2	0.72	0.28	0.07	0.71	0.09	0.33	0.92	0.35	0.52	1.77	0.29	0.12	0.72	0.17	0.46	1.33	0.35	hypothetical protein, conserved
EAH_00028690	3	0.26	0.35	1.21	0.29	na	na	na	na	na	na	0.4	1.53	0.26	na	na	na	0.36	1.72	0.21	hypothetical protein, conserved
EAH_00028680	2	0.26	na	na	na	na	na	na	na	na	na	0.45	1.74	0.26	na	na	na	0.44	1.7	0.26	hypothetical protein, conserved
EAH_00028640	6	0.26	0.25	1.23	0.2	0.22	0.93	0.23	0.22	0.75	0.3	0.39	1.39	0.28	0.21	0.74	0.28	0.43	1.51	0.28	hypothetical protein, conserved
EAH_00028500	6	0.26	0.22	1.02	0.22	0.29	1.12	0.26	0.35	1.46	0.24	0.52	1.91	0.27	0.23	0.94	0.25	0.57	1.91	0.3	hypothetical protein, conserved
EAH_00027880	5	0.26	0.16	0.84	0.19	0.16	1.03	0.16	0.27	0.6	0.45	0.33	1.22	0.27	na	na	na	0.23	1.04	0.22	WD domain, G-beta repeat-containing protein, putative
EAH_00026940	3	0.26	na	na	na	0.32	1.48	0.22	na	na	na	0.44	1.31	0.34	na	na	na	0.39	1.71	0.23	CMGC kinase, putative
EAH_00026330	3	0.26	0.42	1.86	0.23	0.36	1.49	0.24	0.4	1.28	0.31	na	na	na	na	na	na	na	na	na	hypothetical protein, conserved
EAH_00025960	4	0.26	0.46	1.07	0.43	0.55	2.19	0.25	0.25	1.92	0.13	na	na	na	na	na	na	0.37	1.5	0.24	SWIB/MDM2 domain-containing protein, putative
EAH_00025540	2	0.26	na	na	na	0.45	1.32	0.34	NaN	NaN	NaN	0.4	2.1	0.19	na	na	na	na	na	na	IMP-specific 5'-nucleotidase 1 (EC 3.1.3.-), related
EAH_00024780	4	0.26	0.32	1.83	0.17	0.49	1.06	0.46	0.38	1.5	0.25	na	na	na	0.24	1.68	0.14	na	na	na	major facilitator superfamily domain-containing protein, putative
EAH_00024090	6	0.26	0.21	1.03	0.21	0.2	0.64	0.31	0.19	0.86	0.22	0.35	1.28	0.27	0.18	0.62	0.3	0.34	1.28	0.27	hypothetical protein, conserved
EAH_00023040	4	0.26	na	na	na	0.29	0.96	0.3	0.36	0.84	0.43	0.35	2.2	0.16	na	na	na	0.41	2.61	0.16	hypothetical protein, conserved
EAH_00023030	4	0.26	0.33	1.16	0.29	0.4	1.38	0.29	0.45	1.15	0.39	NaN	NaN	NaN	na	na	na	0.42	5.87	0.07	hypothetical protein, conserved
EAH_00022280	5	0.26	0.43	1.5	0.28	0.2	1.02	0.2	0.32	1	0.32	0.59	2.22	0.27	0.3	1.17	0.25	NaN	NaN	NaN	thrombospondin type 1 domain-containing protein, putative
EAH_00022120	4	0.26	0.27	1.11	0.24	0.24	1.12	0.21	0.26	1.18	0.22	na	na	na	0.44	1.27	0.35	na	na	na	hypothetical protein, conserved
EAH_00021930	3	0.26	0.6	2.07	0.29	0.63	3.99	0.16	NaN	NaN	NaN	na	na	na	0.6	1.87	0.32	na	na	na	hypothetical protein, conserved
EAH_00021600	6	0.26	0.19	0.68	0.28	0.18	0.7	0.25	0.2	0.55	0.36	0.31	1.76	0.17	0.19	0.52	0.35	0.3	1.83	0.17	hypothetical protein, conserved
EAH_00020030	4	0.26	0.23	0.78	0.3	0.27	1.13	0.24	0.3	1.07	0.29	na	na	na	0.21	0.94	0.22	NaN	NaN	NaN	hypothetical protein, conserved
EAH_00018760	5	0.26	0.22	0.69	0.32	0.28	0.75	0.38	0.22	0.97	0.23	0.41	4.24	0.1	0.18	0.71	0.26	na	na	na	hypothetical protein, conserved
[truncated: 3,522 more rows]
