# Supplementary material for: Genomic analysis of the causative agents of coccidiosis in domestic chickens
Source: HighWire-hosted journal article supplement (doi:10.1101/gr.168955.113), 2014-07-11
Supplement: Dataset_S3.xlsx [file Dataset_S3.xlsx]

## Sheet: EC assignments
Gene Id	BLAST		DETECT		PRIAM		ToxoDB_orthologs
ETH_00002275	2.4.1.18	1,4-alpha-glucanbranchingenzyme	2.4.1.18	1,4-alpha-glucanbranchingenzyme	2.4.1.18	1,4-alpha-glucanbranchingenzyme	2.4.1.18	1,4-alpha-glucanbranchingenzyme
ETH_00002655	3.6.3.8	Calcium-transportingATPase	3.6.3.8	Calcium-transportingATPase	3.6.3.8	Calcium-transportingATPase	3.6.3.8	Calcium-transportingATPase
ETH_00005270	3.6.3.14	H(+)-transportingtwo-sectorATPase	3.6.3.14	H(+)-transportingtwo-sectorATPase	3.6.3.14	H(+)-transportingtwo-sectorATPase	3.6.3.14	H(+)-transportingtwo-sectorATPase
ETH_00007195	6.2.1.1	Acetate--CoAligase	6.2.1.1	Acetate--CoAligase	6.2.1.1	Acetate--CoAligase	6.2.1.1	Acetate--CoAligase
ETH_00007200	3.6.3.8	Calcium-transportingATPase	3.6.3.8	Calcium-transportingATPase	3.6.3.8	Calcium-transportingATPase	3.6.3.8	Calcium-transportingATPase
ETH_00007780	2.5.1.6	Methionineadenosyltransferase	2.5.1.6	Methionineadenosyltransferase	2.5.1.6	Methionineadenosyltransferase	2.5.1.6	Methionineadenosyltransferase
ETH_00009425	6.1.1.18	Glutamine--tRNAligase	6.1.1.18	Glutamine--tRNAligase	6.1.1.18	Glutamine--tRNAligase	6.1.1.18	Glutamine--tRNAligase
ETH_00012985	3.5.4.6	AMPdeaminase			3.5.4.6	AMPdeaminase	3.5.4.6	AMPdeaminase
ETH_00013045	6.1.1.22	Asparagine--tRNAligase	6.1.1.22	Asparagine--tRNAligase	6.1.1.22	Asparagine--tRNAligase	6.1.1.22	Asparagine--tRNAligase
ETH_00013335					1.3.5.1	Succinatedehydrogenase(ubiquinone)	1.3.5.1	Succinatedehydrogenase(ubiquinone)
ETH_00020300	4.2.1.3	Aconitatehydratase	4.2.1.3	Aconitatehydratase	4.2.1.3	Aconitatehydratase	4.2.1.3	Aconitatehydratase
ETH_00020335	3.6.3.1	Phospholipid-translocatingATPase	3.6.3.1	Phospholipid-translocatingATPase	3.6.3.1	Phospholipid-translocatingATPase	3.6.3.1	Phospholipid-translocatingATPase
ETH_00024080	2.4.1.1	Phosphorylase	2.4.1.1	Phosphorylase	2.4.1.1	Phosphorylase	2.4.1.1	Phosphorylase
ETH_00024910	4.2.1.11	Phosphopyruvatehydratase	4.2.1.11	Phosphopyruvatehydratase	4.2.1.11	Phosphopyruvatehydratase	4.2.1.11	Phosphopyruvatehydratase
ETH_00025665	4.2.1.3	Aconitatehydratase	4.2.1.3	Aconitatehydratase	4.2.1.3	Aconitatehydratase	4.2.1.3	Aconitatehydratase
ETH_00027110	3.3.1.1	Adenosylhomocysteinase	3.3.1.1	Adenosylhomocysteinase	3.3.1.1	Adenosylhomocysteinase	3.3.1.1	Adenosylhomocysteinase
ETH_00028175	1.2.4.2	Oxoglutaratedehydrogenase(succinyl-transferring)			1.2.4.2	Oxoglutaratedehydrogenase(succinyl-transferring)	1.2.4.2	Oxoglutaratedehydrogenase(succinyl-transferring)
ETH_00028700	6.1.1.9	Valine--tRNAligase	6.1.1.9	Valine--tRNAligase	6.1.1.9	Valine--tRNAligase	6.1.1.9	Valine--tRNAligase
ETH_00030005			6.3.5.5	Carbamoyl-phosphatesynthase(glutamine-hydrolyzing)	6.3.4.16	Carbamoyl-phosphatesynthase(ammonia)	6.3.-.-
ETH_00032610	1.17.4.1	Ribonucleoside-diphosphatereductase	1.17.4.1	Ribonucleoside-diphosphatereductase	1.17.4.1	Ribonucleoside-diphosphatereductase	1.17.4.1	Ribonucleoside-diphosphatereductase
ETH_00040515	2.3.3.8	ATPcitratesynthase			2.3.3.8	ATPcitratesynthase	2.3.3.8	ATPcitratesynthase
ETH_00019555	2.3.3.1	Citrate(Si)-synthase			2.3.3.1	Citrate(Si)-synthase	2.3.3.1	Citrate(Si)-synthase
ETH_00020925	3.6.3.14	H(+)-transportingtwo-sectorATPase	3.6.3.14	H(+)-transportingtwo-sectorATPase	3.6.3.15	Sodium-transportingtwo-sectorATPase	3.6.3.14	H(+)-transportingtwo-sectorATPase
ETH_00013105	3.4.11.2	Membranealanylaminopeptidase			3.4.11.2	Membranealanylaminopeptidase	3.4.11.2	Membranealanylaminopeptidase
ETH_00002595	2.3.1.180	Beta-ketoacyl-acyl-carrier-proteinsynthaseIII	2.3.1.180	Beta-ketoacyl-acyl-carrier-proteinsynthaseIII	2.3.1.41	Beta-ketoacyl-acyl-carrier-proteinsynthaseI	2.3.1.180	Beta-ketoacyl-acyl-carrier-proteinsynthaseIII
ETH_00032360	4.1.1.49	Phosphoenolpyruvatecarboxykinase(ATP)			4.1.1.49	Phosphoenolpyruvatecarboxykinase(ATP)	4.1.1.49	Phosphoenolpyruvatecarboxykinase(ATP)
ETH_00000045	6.1.1.15	Proline--tRNAligase	6.1.1.15	Proline--tRNAligase	6.1.1.15	Proline--tRNAligase	6.1.1.15	Proline--tRNAligase
ETH_00005380	2.7.11.24	Mitogen-activatedproteinkinase	2.7.11.24	Mitogen-activatedproteinkinase	2.7.11.24	Mitogen-activatedproteinkinase	2.7.11.24	Mitogen-activatedproteinkinase
ETH_00012475	2.3.1.61	Dihydrolipoyllysine-residuesuccinyltransferase	2.3.1.61	Dihydrolipoyllysine-residuesuccinyltransferase	2.3.1.61	Dihydrolipoyllysine-residuesuccinyltransferase	2.3.1.61	Dihydrolipoyllysine-residuesuccinyltransferase
ETH_00021605	3.1.3.48	Protein-tyrosine-phosphatase	3.1.3.48	Protein-tyrosine-phosphatase	3.1.3.48	Protein-tyrosine-phosphatase
ETH_00004670	2.1.1.62	mRNA(2'-O-methyladenosine-N(6)-)-methyltransferase			2.1.1.62	mRNA(2'-O-methyladenosine-N(6)-)-methyltransferase	2.1.1.62	mRNA(2'-O-methyladenosine-N(6)-)-methyltransferase
ETH_00023295	3.2.1.84	Glucan1,3-alpha-glucosidase			3.2.1.20	Alpha-glucosidase	3.2.1.84	Glucan1,3-alpha-glucosidase
ETH_00025495	1.2.4.4	3-methyl-2-oxobutanoatedehydrogenase(2-methylpropanoyl-transferring)	1.2.4.1	Pyruvatedehydrogenase(acetyl-transferring)	1.2.4.1	Pyruvatedehydrogenase(acetyl-transferring)	1.2.4.4	3-methyl-2-oxobutanoatedehydrogenase(2-methylpropanoyl-transferring)
ETH_00023060	6.3.4.2	CTPsynthase			6.3.4.2	CTPsynthase
ETH_00030080	5.99.1.3	DNAtopoisomerase(ATP-hydrolyzing)	5.99.1.3	DNAtopoisomerase(ATP-hydrolyzing)	5.99.1.3	DNAtopoisomerase(ATP-hydrolyzing)	5.99.1.3	DNAtopoisomerase(ATP-hydrolyzing)
ETH_00035035	3.6.3.43	Peptide-transportingATPase	3.6.3.44	Xenobiotic-transportingATPase	3.6.3.44	Xenobiotic-transportingATPase	3.6.3.44	Xenobiotic-transportingATPase
ETH_00024295	4.1.1.37	Uroporphyrinogendecarboxylase	4.1.1.37	Uroporphyrinogendecarboxylase	4.1.1.37	Uroporphyrinogendecarboxylase	4.1.1.37	Uroporphyrinogendecarboxylase
ETH_00009225	4.2.99.18	DNA-(apurinicorapyrimidinicsite)lyase	3.1.21.2	DeoxyribonucleaseIV(phage-T(4)-induced)	3.1.21.2	DeoxyribonucleaseIV(phage-T(4)-induced)	3.1.21.2	DeoxyribonucleaseIV(phage-T(4)-induced)
ETH_00022465	6.2.1.3	Long-chain-fatty-acid--CoAligase	6.2.1.3	Long-chain-fatty-acid--CoAligase	6.2.1.3	Long-chain-fatty-acid--CoAligase	6.2.1.3	Long-chain-fatty-acid--CoAligase
ETH_00008070	3.4.21.53	EndopeptidaseLa			3.4.21.53	EndopeptidaseLa	3.4.21.53	EndopeptidaseLa
ETH_00006870	3.4.13.9	Xaa-Prodipeptidase	3.4.13.9	Xaa-Prodipeptidase	3.4.13.9	Xaa-Prodipeptidase	3.4.13.9	Xaa-Prodipeptidase
ETH_00018515	5.3.1.9	Glucose-6-phosphateisomerase	5.3.1.9	Glucose-6-phosphateisomerase	5.3.1.9	Glucose-6-phosphateisomerase	5.3.1.9	Glucose-6-phosphateisomerase
ETH_00027740	1.1.1.100	3-oxoacyl-[acyl-carrier-protein]reductase			4.2.1.107	hydratase	1.1.1.35, 4.2.1.107	3-hydroxyacyl-CoAdehydrogenase, hydratase
ETH_00017305	3.4.24.84	Ste24endopeptidase			3.4.24.84	Ste24endopeptidase	3.4.24.84	Ste24endopeptidase
ETH_00014435	2.7.7.4	Sulfateadenylyltransferase	2.7.7.4	Sulfateadenylyltransferase	2.7.7.4	Sulfateadenylyltransferase	2.7.1.25	Adenylyl-sulfatekinase
ETH_00028335	1.1.1.37	Malatedehydrogenase	1.1.1.37	Malatedehydrogenase	1.1.1.37	Malatedehydrogenase	1.1.1.27, 1.1.1.37	L-lactatedehydrogenase, Malatedehydrogenase
ETH_00002905	2.7.12.1	Dual-specificitykinase	2.7.12.1	Dual-specificitykinase	2.7.12.1	Dual-specificitykinase	2.7.12.1	Dual-specificitykinase
ETH_00042040	6.3.4.4	Adenylosuccinatesynthase	6.3.4.4	Adenylosuccinatesynthase	6.3.4.4	Adenylosuccinatesynthase	6.3.4.4	Adenylosuccinatesynthase
ETH_00001175	2.7.11.1	Non-specificserine/threonineproteinkinase			2.7.11.11	cAMP-dependentproteinkinase	2.7.11.11	cAMP-dependentproteinkinase
ETH_00043845	2.3.1.94	6-deoxyerythronolide-Bsynthase			2.3.1.94	6-deoxyerythronolide-Bsynthase	1.1.1.14, 2.3.1.161, 2.3.1.94	L-iditol2-dehydrogenase, Lovastatinnonaketidesynthase, 6-deoxyerythronolide-Bsynthase
ETH_00026690	3.6.3.1	Phospholipid-translocatingATPase			3.6.3.1	Phospholipid-translocatingATPase	3.6.3.1	Phospholipid-translocatingATPase
ETH_00004975	1.3.3.1		1.3.3.1		1.3.3.1		1.3.3.1
ETH_00023100	1.6.1.2	NAD(P)(+)transhydrogenase(AB-specific)			1.6.1.2	NAD(P)(+)transhydrogenase(AB-specific)	1.4.1.1, 1.6.1.2	Alaninedehydrogenase, NAD(P)(+)transhydrogenase(AB-specific)
ETH_00001730	3.4.24.56	Insulysin			3.4.24.56	Insulysin	3.4.24.56	Insulysin
ETH_00006100	2.3.1.168	Dihydrolipoyllysine-residue(2-methylpropanoyl)transferase			2.3.1.168	Dihydrolipoyllysine-residue(2-methylpropanoyl)transferase	2.3.1.168	Dihydrolipoyllysine-residue(2-methylpropanoyl)transferase
ETH_00019090	6.1.1.15	Proline--tRNAligase	6.1.1.15	Proline--tRNAligase	6.1.1.15	Proline--tRNAligase
ETH_00027415	2.7.2.3	Phosphoglyceratekinase	2.7.2.3	Phosphoglyceratekinase	2.7.2.3	Phosphoglyceratekinase	2.7.2.3	Phosphoglyceratekinase
ETH_00033450	3.6.3.4	Copper-exportingATPase	3.6.3.12	Potassium-transportingATPase	3.6.3.4	Copper-exportingATPase	3.6.3.4	Copper-exportingATPase
ETH_00004510	4.2.1.22	Cystathioninebeta-synthase	2.5.1.47	Cysteinesynthase	4.2.1.22	Cystathioninebeta-synthase	4.2.1.22	Cystathioninebeta-synthase
ETH_00032175	6.1.1.17	Glutamate--tRNAligase	6.1.1.17	Glutamate--tRNAligase	6.1.1.17	Glutamate--tRNAligase
ETH_00020325	6.1.1.3	Threonine--tRNAligase	6.1.1.3	Threonine--tRNAligase	6.1.1.3	Threonine--tRNAligase	6.1.1.3	Threonine--tRNAligase
ETH_00013835	1.1.1.100	3-oxoacyl-[acyl-carrier-protein]reductase	1.1.1.100	3-oxoacyl-[acyl-carrier-protein]reductase	1.1.1.100	3-oxoacyl-[acyl-carrier-protein]reductase	1.1.1.100	3-oxoacyl-[acyl-carrier-protein]reductase
ETH_00018890	3.6.3.1	Phospholipid-translocatingATPase	3.6.3.1	Phospholipid-translocatingATPase	3.6.3.1	Phospholipid-translocatingATPase	3.6.3.1	Phospholipid-translocatingATPase
ETH_00021830	6.3.1.2	Glutamate--ammonialigase	6.3.1.2	Glutamate--ammonialigase	6.3.1.2	Glutamate--ammonialigase	6.3.1.2	Glutamate--ammonialigase
ETH_00030905	5.3.1.1	Triose-phosphateisomerase	5.3.1.1	Triose-phosphateisomerase	5.3.1.1	Triose-phosphateisomerase	5.3.1.1	Triose-phosphateisomerase
ETH_00011250	2.7.11.1	Non-specificserine/threonineproteinkinase	2.7.11.17	Calcium/calmodulin-dependentproteinkinase	2.7.11.17	Calcium/calmodulin-dependentproteinkinase	2.7.11.17	Calcium/calmodulin-dependentproteinkinase
ETH_00016095	2.7.11.18	[Myosinlight-chain]kinase			2.7.11.17	Calcium/calmodulin-dependentproteinkinase	2.7.11.17	Calcium/calmodulin-dependentproteinkinase
ETH_00006965	3.6.3.8	Calcium-transportingATPase			3.6.3.8	Calcium-transportingATPase	3.6.3.8	Calcium-transportingATPase
ETH_00026125	2.1.1.45	Thymidylatesynthase	2.1.1.45	Thymidylatesynthase	2.1.1.45	Thymidylatesynthase	1.5.1.3	Dihydrofolatereductase
ETH_00025085	2.7.11.1	Non-specificserine/threonineproteinkinase	2.7.11.17	Calcium/calmodulin-dependentproteinkinase	2.7.11.17	Calcium/calmodulin-dependentproteinkinase	2.7.11.17	Calcium/calmodulin-dependentproteinkinase
ETH_00003915	2.7.1.90	Diphosphate--fructose-6-phosphate1-phosphotransferase			2.7.1.90	Diphosphate--fructose-6-phosphate1-phosphotransferase	2.7.1.90	Diphosphate--fructose-6-phosphate1-phosphotransferase
ETH_00029720	3.1.2.6	Hydroxyacylglutathionehydrolase	3.1.2.6	Hydroxyacylglutathionehydrolase	3.1.2.6	Hydroxyacylglutathionehydrolase	3.1.2.6	Hydroxyacylglutathionehydrolase
ETH_00031570	2.5.1.58	Proteinfarnesyltransferase			2.5.1.58	Proteinfarnesyltransferase	2.5.1.58	Proteinfarnesyltransferase
ETH_00024155	4.4.1.8	Cystathioninebeta-lyase			2.5.1.48	Cystathioninegamma-synthase	4.4.1.1	Cystathioninegamma-lyase
ETH_00006700	1.2.4.1	Pyruvatedehydrogenase(acetyl-transferring)	1.2.4.1	Pyruvatedehydrogenase(acetyl-transferring)	1.2.4.1	Pyruvatedehydrogenase(acetyl-transferring)	1.2.4.1	Pyruvatedehydrogenase(acetyl-transferring)
ETH_00018770	1.1.1.271	GDP-L-fucosesynthase			1.1.1.271	GDP-L-fucosesynthase	1.1.1.271	GDP-L-fucosesynthase
ETH_00024075	1.1.1.42	Isocitratedehydrogenase(NADP(+))	1.1.1.42	Isocitratedehydrogenase(NADP(+))	1.1.1.42	Isocitratedehydrogenase(NADP(+))	1.1.1.42, 1.1.1.87	Isocitratedehydrogenase(NADP(+)), Homoisocitratedehydrogenase
ETH_00015595	3.4.11.2	Membranealanylaminopeptidase			3.4.11.2	Membranealanylaminopeptidase	3.4.11.2	Membranealanylaminopeptidase
ETH_00021990	2.7.11.1	Non-specificserine/threonineproteinkinase			2.7.11.17	Calcium/calmodulin-dependentproteinkinase	2.7.11.17	Calcium/calmodulin-dependentproteinkinase
ETH_00026200	2.4.1.15	Alpha,alpha-trehalose-phosphatesynthase(UDP-forming)			2.4.1.15	Alpha,alpha-trehalose-phosphatesynthase(UDP-forming)
ETH_00028840	2.3.1.48	Histoneacetyltransferase	2.3.1.48	Histoneacetyltransferase	2.3.1.48	Histoneacetyltransferase	2.3.1.48	Histoneacetyltransferase
ETH_00001820	2.1.2.11	3-methyl-2-oxobutanoatehydroxymethyltransferase	2.1.2.11	3-methyl-2-oxobutanoatehydroxymethyltransferase	2.1.2.11	3-methyl-2-oxobutanoatehydroxymethyltransferase
ETH_00003400	2.7.11.22	Cyclin-dependentkinase	2.7.11.22	Cyclin-dependentkinase	2.7.11.22	Cyclin-dependentkinase	2.4.1.244	acetylgalactosaminyltransferase
ETH_00030990	2.7.1.67	1-phosphatidylinositol4-kinase			2.7.1.67	1-phosphatidylinositol4-kinase	2.7.1.67	1-phosphatidylinositol4-kinase
ETH_00027940					2.1.1.61	tRNA(5-methylaminomethyl-2-thiouridylate)-methyltransferase
ETH_00011825	2.2.1.2	Transaldolase	2.2.1.2	Transaldolase	2.2.1.2	Transaldolase	2.2.1.2	Transaldolase
ETH_00032205	2.1.1.98	Diphthinesynthase	2.1.1.98	Diphthinesynthase	2.1.1.98	Diphthinesynthase	2.1.1.98	Diphthinesynthase
ETH_00021120	2.7.7.7	DNA-directedDNApolymerase	2.7.7.7	DNA-directedDNApolymerase	2.7.7.7	DNA-directedDNApolymerase	2.7.7.7	DNA-directedDNApolymerase
ETH_00003655	3.1.4.17	3',5'-cyclic-nucleotidephosphodiesterase			3.1.4.17	3',5'-cyclic-nucleotidephosphodiesterase	3.1.4.17	3',5'-cyclic-nucleotidephosphodiesterase
ETH_00015210	2.7.11.1	Non-specificserine/threonineproteinkinase			2.7.11.11	cAMP-dependentproteinkinase	2.7.11.11	cAMP-dependentproteinkinase
ETH_00024540	2.7.11.1	Non-specificserine/threonineproteinkinase	2.7.11.17	Calcium/calmodulin-dependentproteinkinase	2.7.11.17	Calcium/calmodulin-dependentproteinkinase	2.7.11.17	Calcium/calmodulin-dependentproteinkinase
ETH_00011110	5.2.1.8	Peptidylprolylisomerase	5.2.1.8	Peptidylprolylisomerase	5.2.1.8	Peptidylprolylisomerase	5.2.1.8	Peptidylprolylisomerase
ETH_00013640	1.14.19.1	Stearoyl-CoA9-desaturase			1.14.19.1	Stearoyl-CoA9-desaturase	1.14.19.1	Stearoyl-CoA9-desaturase
ETH_00005300	1.1.1.37	Malatedehydrogenase	1.1.1.37	Malatedehydrogenase	1.1.1.27	L-lactatedehydrogenase	1.1.1.27, 1.1.1.37	L-lactatedehydrogenase, Malatedehydrogenase
ETH_00033315	3.6.1.1	Inorganicdiphosphatase	3.6.1.1	Inorganicdiphosphatase	3.6.1.1	Inorganicdiphosphatase	3.6.1.1	Inorganicdiphosphatase
ETH_00011830	1.15.1.1	Superoxidedismutase	1.15.1.1	Superoxidedismutase	1.15.1.1	Superoxidedismutase	1.15.1.1	Superoxidedismutase
ETH_00004180	2.7.11.24	Mitogen-activatedproteinkinase	2.7.11.24	Mitogen-activatedproteinkinase	2.7.11.24	Mitogen-activatedproteinkinase
ETH_00027640	2.7.1.90	Diphosphate--fructose-6-phosphate1-phosphotransferase			2.7.1.90	Diphosphate--fructose-6-phosphate1-phosphotransferase	2.7.1.90	Diphosphate--fructose-6-phosphate1-phosphotransferase
ETH_00013125	2.5.1.15	Dihydropteroatesynthase	2.5.1.15	Dihydropteroatesynthase	2.5.1.15	Dihydropteroatesynthase	2.5.1.15	Dihydropteroatesynthase
ETH_00019290	2.1.3.2	Aspartatecarbamoyltransferase	2.1.3.2	Aspartatecarbamoyltransferase	2.1.3.2	Aspartatecarbamoyltransferase	2.1.3.2	Aspartatecarbamoyltransferase
ETH_00020725	2.7.11.1	Non-specificserine/threonineproteinkinase			2.7.11.17	Calcium/calmodulin-dependentproteinkinase	2.7.11.17	Calcium/calmodulin-dependentproteinkinase
ETH_00004665	5.3.1.1	Triose-phosphateisomerase	5.3.1.1	Triose-phosphateisomerase	5.3.1.1	Triose-phosphateisomerase	5.3.1.1	Triose-phosphateisomerase
ETH_00013450	4.99.1.1	Ferrochelatase	4.99.1.1	Ferrochelatase	4.99.1.1	Ferrochelatase	4.99.1.1	Ferrochelatase
ETH_00014565	2.7.7.4	Sulfateadenylyltransferase	2.7.7.4	Sulfateadenylyltransferase	2.7.7.4	Sulfateadenylyltransferase
ETH_00033645	1.1.1.44	Phosphogluconatedehydrogenase(decarboxylating)			1.1.1.44	Phosphogluconatedehydrogenase(decarboxylating)	1.1.1.44	Phosphogluconatedehydrogenase(decarboxylating)
ETH_00003770	2.2.1.7	1-deoxy-D-xylulose-5-phosphatesynthase	2.2.1.7	1-deoxy-D-xylulose-5-phosphatesynthase	2.2.1.7	1-deoxy-D-xylulose-5-phosphatesynthase	2.2.1.7	1-deoxy-D-xylulose-5-phosphatesynthase
ETH_00024365	2.7.11.1	Non-specificserine/threonineproteinkinase			2.7.11.17	Calcium/calmodulin-dependentproteinkinase	2.7.11.17	Calcium/calmodulin-dependentproteinkinase
ETH_00003570	3.4.22.16	CathepsinH			3.4.22.1	CathepsinB	3.4.22.1	CathepsinB
ETH_00009385	6.3.5.2	GMPsynthase(glutamine-hydrolyzing)	6.3.5.2	GMPsynthase(glutamine-hydrolyzing)	6.3.5.2	GMPsynthase(glutamine-hydrolyzing)	6.3.5.2	GMPsynthase(glutamine-hydrolyzing)
ETH_00032305	1.11.1.15	Peroxiredoxin	1.11.1.15	Peroxiredoxin	1.11.1.7	Peroxidase	1.11.1.15	Peroxiredoxin
ETH_00019675	6.2.1.3	Long-chain-fatty-acid--CoAligase	6.2.1.3	Long-chain-fatty-acid--CoAligase	6.2.1.3	Long-chain-fatty-acid--CoAligase	6.2.1.3	Long-chain-fatty-acid--CoAligase
ETH_00016690	1.17.4.1	Ribonucleoside-diphosphatereductase	1.17.4.1	Ribonucleoside-diphosphatereductase	1.17.4.1	Ribonucleoside-diphosphatereductase	1.17.4.1	Ribonucleoside-diphosphatereductase
ETH_00000150	2.7.11.1	Non-specificserine/threonineproteinkinase			2.7.12.1	Dual-specificitykinase	2.7.11.24	Mitogen-activatedproteinkinase
ETH_00010685	2.7.11.1	Non-specificserine/threonineproteinkinase			2.7.11.17	Calcium/calmodulin-dependentproteinkinase	2.7.11.17	Calcium/calmodulin-dependentproteinkinase
ETH_00022365	3.6.3.44	Xenobiotic-transportingATPase			3.6.3.44	Xenobiotic-transportingATPase	3.6.3.44	Xenobiotic-transportingATPase
ETH_00026140					3.6.3.14	H(+)-transportingtwo-sectorATPase
ETH_00010290	2.7.7.4	Sulfateadenylyltransferase	2.7.7.4	Sulfateadenylyltransferase	2.7.7.4	Sulfateadenylyltransferase
ETH_00019585	1.10.2.2	Ubiquinol--cytochrome-creductase	1.10.2.2	Ubiquinol--cytochrome-creductase	1.10.2.2	Ubiquinol--cytochrome-creductase	1.10.2.2	Ubiquinol--cytochrome-creductase
ETH_00005865	2.7.4.6	Nucleoside-diphosphatekinase	2.7.4.6	Nucleoside-diphosphatekinase	2.7.4.6	Nucleoside-diphosphatekinase	2.7.4.6	Nucleoside-diphosphatekinase
ETH_00014410	6.1.1.19	Arginine--tRNAligase	6.1.1.19	Arginine--tRNAligase	6.1.1.19	Arginine--tRNAligase	6.1.1.19	Arginine--tRNAligase
ETH_00006260	2.7.11.1	Non-specificserine/threonineproteinkinase			2.7.11.1	Non-specificserine/threonineproteinkinase	2.7.11.17	Calcium/calmodulin-dependentproteinkinase
ETH_00024560	2.7.11.1	Non-specificserine/threonineproteinkinase			2.7.11.17	Calcium/calmodulin-dependentproteinkinase	2.7.11.19	Phosphorylasekinase
ETH_00008460	2.3.1.47	8-amino-7-oxononanoatesynthase			2.3.1.47	8-amino-7-oxononanoatesynthase	2.3.1.50	SerineC-palmitoyltransferase
ETH_00042575	3.4.21.53	EndopeptidaseLa			3.4.21.53	EndopeptidaseLa	3.4.21.53	EndopeptidaseLa
ETH_00008190	2.7.9.5	Phosphoglucan,waterdikinase			2.7.9.5	Phosphoglucan,waterdikinase	3.2.1.60	Glucan1,4-alpha-maltotetraohydrolase
ETH_00027910	2.3.1.179	Beta-ketoacyl-acyl-carrier-proteinsynthaseII			2.3.1.41	Beta-ketoacyl-acyl-carrier-proteinsynthaseI	2.3.1.179	Beta-ketoacyl-acyl-carrier-proteinsynthaseII
ETH_00008195	2.4.1.18	1,4-alpha-glucanbranchingenzyme	2.4.1.18	1,4-alpha-glucanbranchingenzyme	2.4.1.18	1,4-alpha-glucanbranchingenzyme	2.4.1.18	1,4-alpha-glucanbranchingenzyme
ETH_00012720	2.7.4.8	Guanylatekinase	2.7.4.8	Guanylatekinase	2.7.4.8	Guanylatekinase	2.7.4.8	Guanylatekinase
ETH_00017440	1.1.1.267	1-deoxy-D-xylulose-5-phosphatereductoisomerase	1.1.1.267	1-deoxy-D-xylulose-5-phosphatereductoisomerase	1.1.1.267	1-deoxy-D-xylulose-5-phosphatereductoisomerase	1.1.1.267	1-deoxy-D-xylulose-5-phosphatereductoisomerase
ETH_00026715	2.7.11.1	Non-specificserine/threonineproteinkinase			2.7.11.17	Calcium/calmodulin-dependentproteinkinase	2.7.11.17	Calcium/calmodulin-dependentproteinkinase
ETH_00027525	2.7.11.11	cAMP-dependentproteinkinase			2.7.11.11	cAMP-dependentproteinkinase	2.7.11.12	cGMP-dependentproteinkinase
ETH_00005810	5.2.1.8	Peptidylprolylisomerase	5.2.1.8	Peptidylprolylisomerase	5.2.1.8	Peptidylprolylisomerase	5.2.1.8	Peptidylprolylisomerase
ETH_00020530	3.4.24.57		3.4.24.57		3.4.24.57		3.4.24.57
ETH_00013185	6.1.1.4	Leucine--tRNAligase	6.1.1.4	Leucine--tRNAligase	6.1.1.4	Leucine--tRNAligase	6.1.1.4	Leucine--tRNAligase
ETH_00043050	2.6.1.52	Phosphoserinetransaminase	2.6.1.52	Phosphoserinetransaminase	2.6.1.52	Phosphoserinetransaminase	2.6.1.52	Phosphoserinetransaminase
ETH_00000185	1.3.1.9	Enoyl-[acyl-carrier-protein]reductase(NADH)			1.3.1.9	Enoyl-[acyl-carrier-protein]reductase(NADH)	1.3.1.9	Enoyl-[acyl-carrier-protein]reductase(NADH)
ETH_00001715	3.5.2.3	Dihydroorotase	3.5.2.3	Dihydroorotase	3.5.2.3	Dihydroorotase	3.5.2.3	Dihydroorotase
ETH_00022520	1.15.1.1	Superoxidedismutase	1.15.1.1	Superoxidedismutase	1.15.1.1	Superoxidedismutase	1.15.1.1	Superoxidedismutase
ETH_00008525	3.4.23.1	PepsinA			3.4.23.1	PepsinA	3.4.23.1	PepsinA
ETH_00020795	1.17.1.2	4-hydroxy-3-methylbut-2-enyldiphosphatereductase	1.17.1.2	4-hydroxy-3-methylbut-2-enyldiphosphatereductase	1.17.1.2	4-hydroxy-3-methylbut-2-enyldiphosphatereductase	1.17.1.2	4-hydroxy-3-methylbut-2-enyldiphosphatereductase
ETH_00022360	1.1.99.5		1.1.99.5		1.1.3.21	Glycerol-3-phosphateoxidase	1.1.99.5
ETH_00006865	3.1.3.37	Sedoheptulose-bisphosphatase			3.1.3.37	Sedoheptulose-bisphosphatase	3.1.3.-
ETH_00040700	6.1.1.16	Cysteine--tRNAligase	6.1.1.16	Cysteine--tRNAligase	6.1.1.16	Cysteine--tRNAligase	6.1.1.16	Cysteine--tRNAligase
ETH_00041205	1.8.1.4	Dihydrolipoyldehydrogenase	1.8.1.4	Dihydrolipoyldehydrogenase	1.8.1.4	Dihydrolipoyldehydrogenase	1.8.1.4	Dihydrolipoyldehydrogenase
ETH_00033065	2.1.1.103	PhosphoethanolamineN-methyltransferase			2.1.1.103	PhosphoethanolamineN-methyltransferase
ETH_00041360	2.7.11.1	Non-specificserine/threonineproteinkinase			2.7.11.1	Non-specificserine/threonineproteinkinase	2.7.11.1	Non-specificserine/threonineproteinkinase
ETH_00032645	4.2.3.5	Chorismatesynthase	4.2.3.5	Chorismatesynthase	4.2.3.5	Chorismatesynthase	4.2.3.5	Chorismatesynthase
ETH_00011175	3.4.25.1	Proteasomeendopeptidasecomplex	3.4.25.1	Proteasomeendopeptidasecomplex	3.4.25.1	Proteasomeendopeptidasecomplex	3.4.25.1	Proteasomeendopeptidasecomplex
ETH_00030035	2.7.1.137	Phosphatidylinositol3-kinase			2.7.1.137	Phosphatidylinositol3-kinase	2.7.1.137	Phosphatidylinositol3-kinase
ETH_00023000	5.3.1.6	Ribose-5-phosphateisomerase	5.3.1.6	Ribose-5-phosphateisomerase	5.3.1.6	Ribose-5-phosphateisomerase	5.3.1.6	Ribose-5-phosphateisomerase
ETH_00015095	1.4.1.1	Alaninedehydrogenase			1.4.1.1	Alaninedehydrogenase	1.4.1.1	Alaninedehydrogenase
ETH_00000295	2.7.7.7	DNA-directedDNApolymerase	2.7.7.7	DNA-directedDNApolymerase	2.7.7.7	DNA-directedDNApolymerase	2.7.7.7	DNA-directedDNApolymerase
ETH_00020970	6.5.1.2	DNAligase(NAD(+))	6.5.1.2	DNAligase(NAD(+))	6.5.1.2	DNAligase(NAD(+))
ETH_00030695	5.99.1.2	DNAtopoisomerase	5.99.1.2	DNAtopoisomerase	5.99.1.2	DNAtopoisomerase	5.99.1.2	DNAtopoisomerase
ETH_00037295	2.3.1.39	[Acyl-carrier-protein]S-malonyltransferase			2.3.1.39	[Acyl-carrier-protein]S-malonyltransferase	2.3.1.39	[Acyl-carrier-protein]S-malonyltransferase
ETH_00003980	5.2.1.8	Peptidylprolylisomerase	5.2.1.8	Peptidylprolylisomerase	5.2.1.8	Peptidylprolylisomerase	5.2.1.8	Peptidylprolylisomerase
ETH_00008000	2.7.11.1	Non-specificserine/threonineproteinkinase			2.7.11.1	Non-specificserine/threonineproteinkinase	2.7.11.17	Calcium/calmodulin-dependentproteinkinase
ETH_00030635	2.3.1.48	Histoneacetyltransferase	2.3.1.48	Histoneacetyltransferase	2.3.1.48	Histoneacetyltransferase	2.3.1.48	Histoneacetyltransferase
ETH_00018475	2.7.1.68	1-phosphatidylinositol-4-phosphate5-kinase			2.7.1.68	1-phosphatidylinositol-4-phosphate5-kinase	2.7.1.68	1-phosphatidylinositol-4-phosphate5-kinase
ETH_00015150	4.2.3.4	3-dehydroquinatesynthase	4.2.3.4	3-dehydroquinatesynthase	4.2.3.4	3-dehydroquinatesynthase	1.1.1.25	Shikimatedehydrogenase
ETH_00032530	6.1.1.14	Glycine--tRNAligase	6.1.1.14	Glycine--tRNAligase	6.1.1.14	Glycine--tRNAligase	6.1.1.14	Glycine--tRNAligase
ETH_00001040	2.7.11.1	Non-specificserine/threonineproteinkinase			2.7.11.11	cAMP-dependentproteinkinase	2.7.11.11	cAMP-dependentproteinkinase
ETH_00029300	3.4.11.9	Xaa-Proaminopeptidase			3.4.11.9	Xaa-Proaminopeptidase	3.4.11.9	Xaa-Proaminopeptidase
ETH_00016125	2.7.1.33	Pantothenatekinase	2.7.1.33	Pantothenatekinase	2.7.1.33	Pantothenatekinase	2.7.1.33	Pantothenatekinase
ETH_00029190	3.2.1.28	Alpha,alpha-trehalase			3.2.1.28	Alpha,alpha-trehalase
ETH_00030720	3.1.4.17	3',5'-cyclic-nucleotidephosphodiesterase			3.1.4.17	3',5'-cyclic-nucleotidephosphodiesterase	3.1.4.17	3',5'-cyclic-nucleotidephosphodiesterase
ETH_00005965	2.8.1.7	Cysteinedesulfurase	2.8.1.7	Cysteinedesulfurase	2.8.1.7	Cysteinedesulfurase	4.4.1.16	Selenocysteinelyase
ETH_00006065	2.7.7.7	DNA-directedDNApolymerase	2.7.7.7	DNA-directedDNApolymerase	2.7.7.7	DNA-directedDNApolymerase
ETH_00004395	2.4.1.21	Starchsynthase			2.4.1.21	Starchsynthase	2.4.1.21	Starchsynthase
ETH_00014090	1.1.1.133	dTDP-4-dehydrorhamnosereductase			1.1.1.133	dTDP-4-dehydrorhamnosereductase
ETH_00029220	2.7.11.1	Non-specificserine/threonineproteinkinase			2.7.11.1	Non-specificserine/threonineproteinkinase	2.7.11.21	Polokinase
ETH_00030340	3.6.3.44	Xenobiotic-transportingATPase			3.6.3.44	Xenobiotic-transportingATPase	3.6.3.44	Xenobiotic-transportingATPase
ETH_00026890	6.3.2.19	Ubiquitin--proteinligase	6.3.2.19	Ubiquitin--proteinligase	6.3.2.19	Ubiquitin--proteinligase	6.3.2.19	Ubiquitin--proteinligase
ETH_00034495	2.7.1.15	Ribokinase			2.7.1.15	Ribokinase	2.7.1.15	Ribokinase
ETH_00002745	2.7.11.17	Calcium/calmodulin-dependentproteinkinase			2.7.11.17	Calcium/calmodulin-dependentproteinkinase	2.7.11.17	Calcium/calmodulin-dependentproteinkinase
ETH_00034475	5.2.1.8	Peptidylprolylisomerase	5.2.1.8	Peptidylprolylisomerase	5.2.1.8	Peptidylprolylisomerase	5.2.1.8	Peptidylprolylisomerase
ETH_00011900	3.1.4.17	3',5'-cyclic-nucleotidephosphodiesterase			3.1.4.17	3',5'-cyclic-nucleotidephosphodiesterase	3.1.4.17	3',5'-cyclic-nucleotidephosphodiesterase
ETH_00024070	1.1.1.42	Isocitratedehydrogenase(NADP(+))			1.1.1.42	Isocitratedehydrogenase(NADP(+))	1.1.1.42, 1.1.1.87	Isocitratedehydrogenase(NADP(+)), Homoisocitratedehydrogenase
ETH_00014870	3.1.4.11	PhosphoinositidephospholipaseC	3.1.4.11	PhosphoinositidephospholipaseC	3.1.4.11	PhosphoinositidephospholipaseC	3.1.4.11	PhosphoinositidephospholipaseC
ETH_00023130	2.7.1.68	1-phosphatidylinositol-4-phosphate5-kinase			2.7.1.68	1-phosphatidylinositol-4-phosphate5-kinase	2.7.1.68	1-phosphatidylinositol-4-phosphate5-kinase
ETH_00012285	3.6.1.3	Adenosinetriphosphatase			3.6.4.3	Microtubule-severingATPase	3.6.1.3	Adenosinetriphosphatase
ETH_00032835	1.1.1.1	Alcoholdehydrogenase			1.1.1.284	S-(hydroxymethyl)glutathionedehydrogenase	1.1.1.284	S-(hydroxymethyl)glutathionedehydrogenase
ETH_00030795					2.4.1.25	4-alpha-glucanotransferase	2.4.1.25	4-alpha-glucanotransferase
ETH_00032235					2.3.1.26	SterolO-acyltransferase	2.3.1.20, 2.3.1.26	DiacylglycerolO-acyltransferase, SterolO-acyltransferase
ETH_00021285	1.1.1.184	Carbonylreductase(NADPH)			1.1.1.189	Prostaglandin-E(2)9-reductase	1.1.1.189	Prostaglandin-E(2)9-reductase
ETH_00027210	6.1.1.3	Threonine--tRNAligase	6.1.1.3	Threonine--tRNAligase	6.1.1.3	Threonine--tRNAligase	6.1.1.3	Threonine--tRNAligase
ETH_00027335	3.4.25.1	Proteasomeendopeptidasecomplex	3.4.25.1	Proteasomeendopeptidasecomplex	3.4.25.1	Proteasomeendopeptidasecomplex	3.4.25.1	Proteasomeendopeptidasecomplex
ETH_00034895	2.1.1.36				2.1.1.36		2.1.1.36
ETH_00020355	1.1.1.21	Aldehydereductase			1.1.1.274	2,5-didehydrogluconatereductase	1.1.1.274	2,5-didehydrogluconatereductase
ETH_00032635					2.3.1.20	DiacylglycerolO-acyltransferase	2.3.1.20, 2.3.1.26	DiacylglycerolO-acyltransferase, SterolO-acyltransferase
ETH_00015720	2.5.1.58	Proteinfarnesyltransferase			2.5.1.60	ProteingeranylgeranyltransferasetypeII	2.5.1.60	ProteingeranylgeranyltransferasetypeII
ETH_00012515	3.1.4.17	3',5'-cyclic-nucleotidephosphodiesterase			3.1.4.17	3',5'-cyclic-nucleotidephosphodiesterase	3.1.4.17	3',5'-cyclic-nucleotidephosphodiesterase
ETH_00025480					2.7.7.50	mRNAguanylyltransferase	2.7.7.50	mRNAguanylyltransferase
ETH_00031320	2.1.1.64	3-demethylubiquinol3-O-methyltransferase			2.1.1.64	3-demethylubiquinol3-O-methyltransferase	2.1.1.64	3-demethylubiquinol3-O-methyltransferase
ETH_00028270	4.6.1.1	Adenylatecyclase	4.6.1.1	Adenylatecyclase	4.6.1.1	Adenylatecyclase
ETH_00010345	2.4.1.15	Alpha,alpha-trehalose-phosphatesynthase(UDP-forming)			2.4.1.15	Alpha,alpha-trehalose-phosphatesynthase(UDP-forming)	3.1.3.12	Trehalose-phosphatase
ETH_00001880	1.17.4.3		1.17.4.3		1.17.4.3		1.17.7.1	(E)-4-hydroxy-3-methylbut-2-enyl-diphosphatesynthase
ETH_00039635	4.1.1.36	Phosphopantothenoylcysteinedecarboxylase			4.1.1.36	Phosphopantothenoylcysteinedecarboxylase	4.1.1.36	Phosphopantothenoylcysteinedecarboxylase
ETH_00010595	2.7.4.3	Adenylatekinase	2.7.4.3	Adenylatekinase	2.7.4.10	Nucleoside-triphosphate--adenylatekinase	2.7.4.3	Adenylatekinase
ETH_00011410	3.4.25.1	Proteasomeendopeptidasecomplex	3.4.25.1	Proteasomeendopeptidasecomplex	3.4.25.1	Proteasomeendopeptidasecomplex	3.4.25.1	Proteasomeendopeptidasecomplex
ETH_00015510	2.7.11.1	Non-specificserine/threonineproteinkinase			2.7.11.1	Non-specificserine/threonineproteinkinase	2.7.11.21	Polokinase
ETH_00027390					3.1.13.4	Poly(A)-specificribonuclease	3.1.13.4	Poly(A)-specificribonuclease
ETH_00020020	3.4.21.105	Rhomboidprotease	3.4.21.105	Rhomboidprotease	3.4.21.105	Rhomboidprotease	3.4.21.105	Rhomboidprotease
ETH_00031080	6.1.1.1	Tyrosine--tRNAligase	6.1.1.1	Tyrosine--tRNAligase	6.1.1.1	Tyrosine--tRNAligase	6.1.1.1	Tyrosine--tRNAligase
ETH_00040975	6.1.1.21	Histidine--tRNAligase	6.1.1.21	Histidine--tRNAligase	6.1.1.21	Histidine--tRNAligase	6.1.1.21	Histidine--tRNAligase
ETH_00029115	2.4.1.41	PolypeptideN-acetylgalactosaminyltransferase	2.4.1.41	PolypeptideN-acetylgalactosaminyltransferase	2.4.1.41	PolypeptideN-acetylgalactosaminyltransferase	2.4.1.41	PolypeptideN-acetylgalactosaminyltransferase
ETH_00014360	2.3.1.15	Glycerol-3-phosphate1-O-acyltransferase			2.3.1.42	Glycerone-phosphateO-acyltransferase	2.3.1.42	Glycerone-phosphateO-acyltransferase
ETH_00041775	6.2.1.4	Succinate--CoAligase(GDP-forming)			6.2.1.4	Succinate--CoAligase(GDP-forming)	6.2.1.4	Succinate--CoAligase(GDP-forming)
ETH_00011530	3.5.1.1	Asparaginase			3.1.1.5	Lysophospholipase	3.1.1.47	1-alkyl-2-acetylglycerophosphocholineesterase
ETH_00014915	1.8.1.9	Thioredoxin-disulfidereductase			1.8.1.7	Glutathione-disulfidereductase	1.8.1.7	Glutathione-disulfidereductase
ETH_00018005	3.1.3.16	Phosphoproteinphosphatase	3.1.3.16	Phosphoproteinphosphatase	3.1.3.16	Phosphoproteinphosphatase	3.1.3.16	Phosphoproteinphosphatase
ETH_00001340	3.4.25.1	Proteasomeendopeptidasecomplex	3.4.25.1	Proteasomeendopeptidasecomplex	3.4.25.1	Proteasomeendopeptidasecomplex	3.4.25.1	Proteasomeendopeptidasecomplex
ETH_00012945	2.7.11.1	Non-specificserine/threonineproteinkinase			2.7.11.1	Non-specificserine/threonineproteinkinase	2.7.12.2	Mitogen-activatedproteinkinasekinase
ETH_00027260	1.1.1.60	2-hydroxy-3-oxopropionatereductase			1.1.1.60	2-hydroxy-3-oxopropionatereductase	1.1.1.31, 1.1.1.60	3-hydroxyisobutyratedehydrogenase, 2-hydroxy-3-oxopropionatereductase
ETH_00006545	2.1.1.32		2.1.1.32		2.1.1.32		2.1.1.32
ETH_00032210	6.3.2.19	Ubiquitin--proteinligase	6.3.2.19	Ubiquitin--proteinligase	6.3.2.19	Ubiquitin--proteinligase	6.3.2.19	Ubiquitin--proteinligase
ETH_00039290	2.7.11.1	Non-specificserine/threonineproteinkinase			2.7.11.22	Cyclin-dependentkinase	2.7.11.23	[RNA-polymerase]-subunitkinase
ETH_00014365	6.1.1.9	Valine--tRNAligase			6.1.1.9	Valine--tRNAligase	6.1.1.9	Valine--tRNAligase
ETH_00042495	6.3.2.19	Ubiquitin--proteinligase	6.3.2.19	Ubiquitin--proteinligase	6.3.2.19	Ubiquitin--proteinligase	6.3.2.19	Ubiquitin--proteinligase
ETH_00042525	1.11.1.15	Peroxiredoxin	1.11.1.15	Peroxiredoxin	1.11.1.15	Peroxiredoxin	1.11.1.15	Peroxiredoxin
ETH_00004110	4.1.1.19	Argininedecarboxylase	4.1.1.19	Argininedecarboxylase	4.1.1.19	Argininedecarboxylase	4.1.1.19	Argininedecarboxylase
ETH_00028375					2.1.1.125	Histone-arginineN-methyltransferase	2.1.1.125	Histone-arginineN-methyltransferase
ETH_00012925	3.6.1.3	Adenosinetriphosphatase			3.6.4.3	Microtubule-severingATPase	3.6.1.3	Adenosinetriphosphatase
ETH_00028820	3.6.4.3	Microtubule-severingATPase			3.6.4.3	Microtubule-severingATPase	3.6.4.3	Microtubule-severingATPase
ETH_00002270	3.1.4.35	3',5'-cyclic-GMPphosphodiesterase			3.1.4.17	3',5'-cyclic-nucleotidephosphodiesterase	3.1.4.17	3',5'-cyclic-nucleotidephosphodiesterase
ETH_00026020	3.6.1.3	Adenosinetriphosphatase			3.6.4.3	Microtubule-severingATPase	3.6.1.3	Adenosinetriphosphatase
ETH_00023650	2.7.11.22	Cyclin-dependentkinase			2.7.11.22	Cyclin-dependentkinase	2.7.11.23	[RNA-polymerase]-subunitkinase
ETH_00015775	3.6.1.3	Adenosinetriphosphatase			3.6.4.3	Microtubule-severingATPase	3.6.4.3	Microtubule-severingATPase
ETH_00020595	5.2.1.8	Peptidylprolylisomerase	5.2.1.8	Peptidylprolylisomerase	5.2.1.8	Peptidylprolylisomerase	5.2.1.8	Peptidylprolylisomerase
ETH_00024310	5.2.1.8	Peptidylprolylisomerase	5.2.1.8	Peptidylprolylisomerase	5.2.1.8	Peptidylprolylisomerase	5.2.1.8	Peptidylprolylisomerase
ETH_00020095	3.6.4.3	Microtubule-severingATPase			3.6.4.3	Microtubule-severingATPase	3.6.4.3	Microtubule-severingATPase
ETH_00042900	1.15.1.1	Superoxidedismutase	1.15.1.1	Superoxidedismutase	1.15.1.1	Superoxidedismutase	1.15.1.1	Superoxidedismutase
ETH_00001030	2.7.7.4	Sulfateadenylyltransferase			2.7.7.4	Sulfateadenylyltransferase
ETH_00002825	3.5.1.32	Hippuratehydrolase			3.5.1.32	Hippuratehydrolase	3.5.1.32	Hippuratehydrolase
ETH_00006210	5.3.4.1	Proteindisulfide-isomerase	5.3.4.1	Proteindisulfide-isomerase	5.3.4.1	Proteindisulfide-isomerase	2.4.1.119	Dolichyl-diphosphooligosaccharide--proteinglycotransferase
ETH_00038210	6.3.5.4	Asparaginesynthase(glutamine-hydrolyzing)	6.3.5.4	Asparaginesynthase(glutamine-hydrolyzing)	6.3.5.4	Asparaginesynthase(glutamine-hydrolyzing)	6.3.5.4	Asparaginesynthase(glutamine-hydrolyzing)
ETH_00002250	6.3.2.19	Ubiquitin--proteinligase	6.3.2.19	Ubiquitin--proteinligase	6.3.2.19	Ubiquitin--proteinligase	6.3.2.19	Ubiquitin--proteinligase
ETH_00009820					3.4.21.105	Rhomboidprotease	3.4.21.105	Rhomboidprotease
ETH_00035265	3.1.3.16	Phosphoproteinphosphatase	3.1.3.16	Phosphoproteinphosphatase	3.1.3.16	Phosphoproteinphosphatase
ETH_00021510	6.3.2.19	Ubiquitin--proteinligase	6.3.2.19	Ubiquitin--proteinligase	6.3.2.19	Ubiquitin--proteinligase	6.3.2.19	Ubiquitin--proteinligase
ETH_00031940					3.6.3.14	H(+)-transportingtwo-sectorATPase	3.6.3.14	H(+)-transportingtwo-sectorATPase
ETH_00042545	3.6.3.44	Xenobiotic-transportingATPase			3.6.3.44	Xenobiotic-transportingATPase	3.6.3.43	Peptide-transportingATPase
ETH_00021140	5.2.1.8	Peptidylprolylisomerase	5.2.1.8	Peptidylprolylisomerase	5.2.1.8	Peptidylprolylisomerase	5.2.1.8	Peptidylprolylisomerase
ETH_00007865	6.3.2.19	Ubiquitin--proteinligase	6.3.2.19	Ubiquitin--proteinligase	6.3.2.19	Ubiquitin--proteinligase	6.3.2.19	Ubiquitin--proteinligase
ETH_00017990					2.7.7.49	RNA-directedDNApolymerase
ETH_00008155	3.2.1.143	Poly(ADP-ribose)glycohydrolase			3.2.1.143	Poly(ADP-ribose)glycohydrolase	3.2.1.143	Poly(ADP-ribose)glycohydrolase
ETH_00010215	2.3.1.42	Glycerone-phosphateO-acyltransferase	2.3.1.15	Glycerol-3-phosphate1-O-acyltransferase	2.3.1.15	Glycerol-3-phosphate1-O-acyltransferase
ETH_00039335	3.6.3.44	Xenobiotic-transportingATPase			3.6.3.44	Xenobiotic-transportingATPase	3.6.3.27, 3.6.3.42	Phosphate-transportingATPase, Beta-glucan-transportingATPase
ETH_00000830	3.4.25.1	Proteasomeendopeptidasecomplex	3.4.25.1	Proteasomeendopeptidasecomplex	3.4.25.1	Proteasomeendopeptidasecomplex	3.4.25.1	Proteasomeendopeptidasecomplex
ETH_00017270					2.7.7.49	RNA-directedDNApolymerase
ETH_00015865	1.3.3.6	Acyl-CoAoxidase			1.3.99.7	Glutaryl-CoAdehydrogenase	1.3.99.7	Glutaryl-CoAdehydrogenase
ETH_00043935	3.4.11.2	Membranealanylaminopeptidase			3.4.11.2	Membranealanylaminopeptidase	3.4.11.2	Membranealanylaminopeptidase
ETH_00019475					2.5.1.1	Dimethylallyltranstransferase	2.5.1.29	Geranylgeranyldiphosphatesynthase
ETH_00029775	2.1.1.43	Histone-lysineN-methyltransferase	2.1.1.43	Histone-lysineN-methyltransferase	2.1.1.43	Histone-lysineN-methyltransferase	2.1.1.43	Histone-lysineN-methyltransferase
ETH_00030645					2.7.7.49	RNA-directedDNApolymerase
ETH_00000575	2.7.11.1	Non-specificserine/threonineproteinkinase			2.7.11.25	Mitogen-activatedproteinkinasekinasekinase
ETH_00006185	1.8.4.11	Peptide-methionine(S)-S-oxidereductase	1.8.4.11	Peptide-methionine(S)-S-oxidereductase	1.8.4.6		1.8.4.11	Peptide-methionine(S)-S-oxidereductase
ETH_00010985	3.6.1.3	Adenosinetriphosphatase			3.6.4.3	Microtubule-severingATPase	3.6.4.3	Microtubule-severingATPase
ETH_00015250	6.3.2.19	Ubiquitin--proteinligase	6.3.2.19	Ubiquitin--proteinligase	6.3.2.19	Ubiquitin--proteinligase	6.3.2.19	Ubiquitin--proteinligase
ETH_00021530	1.17.4.1	Ribonucleoside-diphosphatereductase	1.17.4.1	Ribonucleoside-diphosphatereductase	1.17.4.1	Ribonucleoside-diphosphatereductase	1.17.4.1	Ribonucleoside-diphosphatereductase
ETH_00030180	4.6.1.12	2-C-methyl-D-erythritol2,4-cyclodiphosphatesynthase	4.6.1.12	2-C-methyl-D-erythritol2,4-cyclodiphosphatesynthase	4.6.1.12	2-C-methyl-D-erythritol2,4-cyclodiphosphatesynthase	4.6.1.12	2-C-methyl-D-erythritol2,4-cyclodiphosphatesynthase
ETH_00007805	2.7.1.67	1-phosphatidylinositol4-kinase			2.7.1.67	1-phosphatidylinositol4-kinase	2.7.1.67	1-phosphatidylinositol4-kinase
ETH_00020030	2.7.11.17	Calcium/calmodulin-dependentproteinkinase			2.7.11.1	Non-specificserine/threonineproteinkinase	2.7.11.17	Calcium/calmodulin-dependentproteinkinase
ETH_00028385	1.4.3.22	Diamineoxidase			1.4.3.6		1.4.3.22	Diamineoxidase
ETH_00009125	1.3.99.2				1.3.99.2		1.3.99.2
ETH_00021745	2.8.1.7	Cysteinedesulfurase	2.8.1.7	Cysteinedesulfurase	2.8.1.7	Cysteinedesulfurase	2.8.1.7	Cysteinedesulfurase
ETH_00021485	3.4.14.5	Dipeptidyl-peptidaseIV			3.4.14.5	Dipeptidyl-peptidaseIV
ETH_00024585					2.7.7.49	RNA-directedDNApolymerase
ETH_00026710	3.1.26.4	RibonucleaseH	3.1.26.4	RibonucleaseH	3.1.26.4	RibonucleaseH	3.1.26.4	RibonucleaseH
ETH_00032875	3.6.1.3	Adenosinetriphosphatase			3.6.4.3	Microtubule-severingATPase	3.6.1.3	Adenosinetriphosphatase
ETH_00005160	4.1.99.3	Deoxyribodipyrimidinephoto-lyase			4.1.99.3	Deoxyribodipyrimidinephoto-lyase	4.1.99.3	Deoxyribodipyrimidinephoto-lyase
ETH_00017800	2.7.11.12	cGMP-dependentproteinkinase			2.7.11.12	cGMP-dependentproteinkinase	2.7.11.12	cGMP-dependentproteinkinase
ETH_00019065					2.7.7.49	RNA-directedDNApolymerase
ETH_00009550	2.7.11.1	Non-specificserine/threonineproteinkinase			2.7.11.25	Mitogen-activatedproteinkinasekinasekinase	2.7.11.25	Mitogen-activatedproteinkinasekinasekinase
ETH_00001555	3.1.2.15		3.1.2.15		3.1.2.15		3.1.2.15
ETH_00003260	3.1.2.15		3.1.2.15		3.1.2.15		3.1.2.15
ETH_00025355	2.7.11.1	Non-specificserine/threonineproteinkinase			2.7.11.1	Non-specificserine/threonineproteinkinase	2.7.11.17, 2.7.11.25, 2.7.12.2	Calcium/calmodulin-dependentproteinkinase, Mitogen-activatedproteinkinasekinasekinase, Mitogen-activatedproteinkinasekinase
ETH_00003665					4.4.1.5	Lactoylglutathionelyase	4.4.1.5	Lactoylglutathionelyase
ETH_00006755	3.1.3.16	Phosphoproteinphosphatase	3.1.3.16	Phosphoproteinphosphatase	3.1.3.16	Phosphoproteinphosphatase	3.1.3.16	Phosphoproteinphosphatase
ETH_00006825	3.4.21.62	Subtilisin			3.4.21.66	Thermitase	3.4.21.66	Thermitase
ETH_00006590	3.6.1.3	Adenosinetriphosphatase			3.6.4.3	Microtubule-severingATPase	3.6.4.3	Microtubule-severingATPase
ETH_00011565	1.11.1.9	Glutathioneperoxidase			1.11.1.9	Glutathioneperoxidase	1.11.1.15	Peroxiredoxin
ETH_00029410					2.7.7.49	RNA-directedDNApolymerase
ETH_00006665	5.2.1.8	Peptidylprolylisomerase	5.2.1.8	Peptidylprolylisomerase	5.2.1.8	Peptidylprolylisomerase	5.2.1.8	Peptidylprolylisomerase
ETH_00032090	3.6.3.14	H(+)-transportingtwo-sectorATPase	3.6.3.14	H(+)-transportingtwo-sectorATPase	3.6.3.15	Sodium-transportingtwo-sectorATPase	3.6.3.14	H(+)-transportingtwo-sectorATPase
ETH_00011590					2.7.7.49	RNA-directedDNApolymerase
ETH_00011005					2.7.7.49	RNA-directedDNApolymerase
ETH_00015320	2.1.1.43	Histone-lysineN-methyltransferase	2.1.1.43	Histone-lysineN-methyltransferase	2.1.1.43	Histone-lysineN-methyltransferase
ETH_00034730					2.7.7.49	RNA-directedDNApolymerase
ETH_00020895	3.4.11.18	Methionylaminopeptidase	3.4.11.18	Methionylaminopeptidase	3.4.11.18	Methionylaminopeptidase	3.4.11.18	Methionylaminopeptidase
ETH_00021675	2.7.11.1	Non-specificserine/threonineproteinkinase			2.7.11.17	Calcium/calmodulin-dependentproteinkinase	2.7.11.17	Calcium/calmodulin-dependentproteinkinase
ETH_00002465	3.6.3.44	Xenobiotic-transportingATPase			3.6.3.44	Xenobiotic-transportingATPase	3.6.3.27, 3.6.3.42	Phosphate-transportingATPase, Beta-glucan-transportingATPase
ETH_00011905	3.1.4.17	3',5'-cyclic-nucleotidephosphodiesterase			3.1.4.17	3',5'-cyclic-nucleotidephosphodiesterase	3.1.4.17	3',5'-cyclic-nucleotidephosphodiesterase
ETH_00016305	2.3.1.9	Acetyl-CoAC-acetyltransferase	2.3.1.16	Acetyl-CoAC-acyltransferase	2.3.1.9	Acetyl-CoAC-acetyltransferase	2.3.1.9	Acetyl-CoAC-acetyltransferase
ETH_00004070	3.1.3.16	Phosphoproteinphosphatase	3.1.3.16	Phosphoproteinphosphatase	3.1.3.16	Phosphoproteinphosphatase	3.1.3.16	Phosphoproteinphosphatase
ETH_00014220	3.4.19.1	Acylaminoacyl-peptidase			3.4.19.1	Acylaminoacyl-peptidase	3.4.19.1	Acylaminoacyl-peptidase
ETH_00009645	3.6.3.4	Copper-exportingATPase	3.6.3.12	Potassium-transportingATPase	3.6.3.4	Copper-exportingATPase	3.6.3.4	Copper-exportingATPase
ETH_00026655	2.3.3.5	2-methylcitratesynthase			2.3.3.5	2-methylcitratesynthase	2.3.3.1, 2.3.3.5	Citrate(Si)-synthase, 2-methylcitratesynthase
ETH_00002795	1.9.3.1	Cytochrome-coxidase	1.9.3.1	Cytochrome-coxidase	1.9.3.1	Cytochrome-coxidase	1.9.3.1	Cytochrome-coxidase
ETH_00020645	2.3.1.15	Glycerol-3-phosphate1-O-acyltransferase			2.3.1.15	Glycerol-3-phosphate1-O-acyltransferase	2.3.1.15	Glycerol-3-phosphate1-O-acyltransferase
ETH_00008785	3.4.25.1	Proteasomeendopeptidasecomplex	3.4.25.1	Proteasomeendopeptidasecomplex	3.4.25.1	Proteasomeendopeptidasecomplex	3.4.25.1	Proteasomeendopeptidasecomplex
ETH_00020280	3.1.4.17	3',5'-cyclic-nucleotidephosphodiesterase			3.1.4.17	3',5'-cyclic-nucleotidephosphodiesterase	3.1.4.17	3',5'-cyclic-nucleotidephosphodiesterase
ETH_00031270					2.7.7.49	RNA-directedDNApolymerase
ETH_00008925	3.1.2.15		3.1.2.15		3.1.2.15		3.1.2.15
ETH_00035175	1.1.99.16				1.1.99.16		1.1.99.16
ETH_00001380	5.4.99.12	tRNApseudouridine(38-40)synthase	5.4.99.12	tRNApseudouridine(38-40)synthase	5.4.99.12	tRNApseudouridine(38-40)synthase	5.4.99.12	tRNApseudouridine(38-40)synthase
ETH_00039715	3.1.4.17	3',5'-cyclic-nucleotidephosphodiesterase			3.1.4.17	3',5'-cyclic-nucleotidephosphodiesterase	3.1.4.17	3',5'-cyclic-nucleotidephosphodiesterase
ETH_00016455	2.7.7.7	DNA-directedDNApolymerase	2.7.7.7	DNA-directedDNApolymerase	2.7.7.7	DNA-directedDNApolymerase
ETH_00016865	3.1.3.16	Phosphoproteinphosphatase	3.1.3.16	Phosphoproteinphosphatase	3.1.3.16	Phosphoproteinphosphatase	3.1.3.16	Phosphoproteinphosphatase
ETH_00022015	2.7.11.1	Non-specificserine/threonineproteinkinase			2.7.11.17	Calcium/calmodulin-dependentproteinkinase	2.7.11.17	Calcium/calmodulin-dependentproteinkinase
ETH_00028870	6.1.1.6	Lysine--tRNAligase	6.1.1.6	Lysine--tRNAligase	6.1.1.6	Lysine--tRNAligase	6.1.1.6	Lysine--tRNAligase
ETH_00032800	3.6.3.44	Xenobiotic-transportingATPase			3.6.3.44	Xenobiotic-transportingATPase	3.6.3.25, 3.6.3.28	Sulfate-transportingATPase, Phosphonate-transportingATPase
ETH_00040480					3.4.21.105	Rhomboidprotease	3.4.21.105	Rhomboidprotease
ETH_00000585	2.7.11.11	cAMP-dependentproteinkinase			2.7.11.11	cAMP-dependentproteinkinase	2.7.11.11	cAMP-dependentproteinkinase
ETH_00013815					2.7.7.49	RNA-directedDNApolymerase
ETH_00003145	2.7.1.35	Pyridoxalkinase	2.7.1.35	Pyridoxalkinase	2.7.1.35	Pyridoxalkinase	2.7.1.35	Pyridoxalkinase
ETH_00034280	1.1.1.267	1-deoxy-D-xylulose-5-phosphatereductoisomerase			1.1.1.267	1-deoxy-D-xylulose-5-phosphatereductoisomerase	1.1.1.267	1-deoxy-D-xylulose-5-phosphatereductoisomerase
ETH_00001615	2.4.2.8	Hypoxanthinephosphoribosyltransferase	2.4.2.8	Hypoxanthinephosphoribosyltransferase	2.4.2.8	Hypoxanthinephosphoribosyltransferase	2.4.2.8	Hypoxanthinephosphoribosyltransferase
ETH_00033320	2.5.1.8		2.5.1.8		2.5.1.8		2.5.1.8
ETH_00007635	2.7.11.25	Mitogen-activatedproteinkinasekinasekinase			2.7.11.25	Mitogen-activatedproteinkinasekinasekinase	2.7.11.25	Mitogen-activatedproteinkinasekinasekinase
ETH_00009100	2.7.7.7	DNA-directedDNApolymerase	2.7.7.7	DNA-directedDNApolymerase	2.7.7.7	DNA-directedDNApolymerase	2.7.7.7	DNA-directedDNApolymerase
ETH_00009675	3.4.25.1	Proteasomeendopeptidasecomplex	3.4.25.1	Proteasomeendopeptidasecomplex	3.4.25.1	Proteasomeendopeptidasecomplex	3.4.25.1	Proteasomeendopeptidasecomplex
ETH_00023040					2.3.1.88	Peptidealpha-N-acetyltransferase	2.3.1.88	Peptidealpha-N-acetyltransferase
ETH_00032050	3.1.3.16	Phosphoproteinphosphatase	3.1.3.16	Phosphoproteinphosphatase	3.1.3.16	Phosphoproteinphosphatase	3.1.3.16	Phosphoproteinphosphatase
ETH_00011940	2.7.11.12	cGMP-dependentproteinkinase			2.7.11.12	cGMP-dependentproteinkinase	2.7.11.12	cGMP-dependentproteinkinase
ETH_00020430					2.7.7.49	RNA-directedDNApolymerase
ETH_00027915	2.3.1.179	Beta-ketoacyl-acyl-carrier-proteinsynthaseII			2.3.1.41	Beta-ketoacyl-acyl-carrier-proteinsynthaseI	2.3.1.179	Beta-ketoacyl-acyl-carrier-proteinsynthaseII
ETH_00029185	3.1.3.16	Phosphoproteinphosphatase			3.1.3.16	Phosphoproteinphosphatase	3.1.3.16	Phosphoproteinphosphatase
ETH_00021045					2.7.7.49	RNA-directedDNApolymerase
ETH_00016960	2.7.7.7	DNA-directedDNApolymerase	2.7.7.7	DNA-directedDNApolymerase	2.7.7.7	DNA-directedDNApolymerase	2.7.7.7	DNA-directedDNApolymerase
ETH_00029770	2.7.11.1	Non-specificserine/threonineproteinkinase			2.7.11.17	Calcium/calmodulin-dependentproteinkinase	2.7.11.1	Non-specificserine/threonineproteinkinase
ETH_00040695	3.6.3.44	Xenobiotic-transportingATPase			3.6.3.44	Xenobiotic-transportingATPase	3.6.3.43	Peptide-transportingATPase
ETH_00017160	2.7.11.1	Non-specificserine/threonineproteinkinase			2.7.11.25	Mitogen-activatedproteinkinasekinasekinase	2.7.11.25	Mitogen-activatedproteinkinasekinasekinase
ETH_00040900	2.7.2.3	Phosphoglyceratekinase			2.7.2.3	Phosphoglyceratekinase	2.7.2.3	Phosphoglyceratekinase
ETH_00027030	2.7.9.3	Selenide,waterdikinase	2.7.9.3	Selenide,waterdikinase	2.7.9.3	Selenide,waterdikinase	2.7.9.3	Selenide,waterdikinase
ETH_00031210	3.4.25.1	Proteasomeendopeptidasecomplex	3.4.25.1	Proteasomeendopeptidasecomplex	3.4.25.1	Proteasomeendopeptidasecomplex	3.4.25.1	Proteasomeendopeptidasecomplex
ETH_00034545					2.7.7.49	RNA-directedDNApolymerase
ETH_00000330	2.4.1.34	1,3-beta-glucansynthase			2.4.1.34	1,3-beta-glucansynthase	2.4.1.34	1,3-beta-glucansynthase
ETH_00020880	2.5.1.61	Hydroxymethylbilanesynthase	2.5.1.61	Hydroxymethylbilanesynthase	2.5.1.61	Hydroxymethylbilanesynthase	2.5.1.61	Hydroxymethylbilanesynthase
ETH_00037035	1.1.1.42	Isocitratedehydrogenase(NADP(+))			1.1.1.42	Isocitratedehydrogenase(NADP(+))	1.1.1.42, 1.1.1.87	Isocitratedehydrogenase(NADP(+)), Homoisocitratedehydrogenase
ETH_00012195					2.7.7.49	RNA-directedDNApolymerase
ETH_00016670	3.4.25.1	Proteasomeendopeptidasecomplex	3.4.25.1	Proteasomeendopeptidasecomplex	3.4.25.1	Proteasomeendopeptidasecomplex	3.4.25.1	Proteasomeendopeptidasecomplex
ETH_00025810					2.7.7.49	RNA-directedDNApolymerase
ETH_00027865	1.11.1.15	Peroxiredoxin	1.11.1.15	Peroxiredoxin	1.11.1.15	Peroxiredoxin	1.11.1.15	Peroxiredoxin
ETH_00022855	3.6.3.8	Calcium-transportingATPase			3.6.3.8	Calcium-transportingATPase	3.6.3.8	Calcium-transportingATPase
ETH_00023685	2.7.7.19	Polynucleotideadenylyltransferase	2.7.7.19	Polynucleotideadenylyltransferase	2.7.7.19	Polynucleotideadenylyltransferase	2.7.7.19	Polynucleotideadenylyltransferase
ETH_00033170	2.7.11.1	Non-specificserine/threonineproteinkinase			2.7.11.1	Non-specificserine/threonineproteinkinase	2.7.11.17	Calcium/calmodulin-dependentproteinkinase
ETH_00001660	3.1.3.4	Phosphatidatephosphatase			3.1.3.4	Phosphatidatephosphatase	3.1.3.4	Phosphatidatephosphatase
ETH_00008875	6.1.1.21	Histidine--tRNAligase	6.1.1.21	Histidine--tRNAligase	6.1.1.21	Histidine--tRNAligase	6.1.1.21	Histidine--tRNAligase
ETH_00014785					2.7.7.49	RNA-directedDNApolymerase
ETH_00040380	6.1.1.12	Aspartate--tRNAligase	6.1.1.12	Aspartate--tRNAligase	6.1.1.12	Aspartate--tRNAligase	6.1.1.12	Aspartate--tRNAligase
ETH_00003650	6.1.1.1	Tyrosine--tRNAligase	6.1.1.1	Tyrosine--tRNAligase	6.1.1.1	Tyrosine--tRNAligase	6.1.1.1	Tyrosine--tRNAligase
ETH_00018660	3.1.3.16	Phosphoproteinphosphatase	3.1.3.16	Phosphoproteinphosphatase	3.1.3.16	Phosphoproteinphosphatase	3.1.3.16	Phosphoproteinphosphatase
ETH_00024565	1.18.1.2	Ferredoxin--NADP(+)reductase	1.18.1.2	Ferredoxin--NADP(+)reductase	1.18.1.2	Ferredoxin--NADP(+)reductase	1.18.1.2	Ferredoxin--NADP(+)reductase
ETH_00002550	1.1.1.102	3-dehydrosphinganinereductase			1.1.1.102	3-dehydrosphinganinereductase	1.1.1.102	3-dehydrosphinganinereductase
ETH_00015855	2.1.1.31				2.1.1.31		2.1.1.31
ETH_00022165	6.1.1.14	Glycine--tRNAligase			6.1.1.14	Glycine--tRNAligase	6.1.1.14	Glycine--tRNAligase
ETH_00025880					2.7.7.49	RNA-directedDNApolymerase
ETH_00037555	2.5.1.31	diphosphatespecific)	2.5.1.31	diphosphatespecific)	2.5.1.31	diphosphatespecific)	2.5.1.31	diphosphatespecific)
ETH_00030760	2.7.11.1	Non-specificserine/threonineproteinkinase			2.7.11.1	Non-specificserine/threonineproteinkinase	2.7.11.17	Calcium/calmodulin-dependentproteinkinase
ETH_00009520					2.7.7.49	RNA-directedDNApolymerase
ETH_00011050	3.4.21.62	Subtilisin			3.4.21.66	Thermitase	3.4.21.66	Thermitase
ETH_00011690					2.7.7.49	RNA-directedDNApolymerase
ETH_00034395	3.1.3.16	Phosphoproteinphosphatase	3.1.3.16	Phosphoproteinphosphatase	3.1.3.16	Phosphoproteinphosphatase	3.1.3.16	Phosphoproteinphosphatase
ETH_00036550	3.6.3.16	Arsenite-transportingATPase			3.6.3.16	Arsenite-transportingATPase	3.6.3.16	Arsenite-transportingATPase
ETH_00001370	2.7.11.1	Non-specificserine/threonineproteinkinase			2.7.11.1	Non-specificserine/threonineproteinkinase	2.7.11.21	Polokinase
ETH_00009480	3.6.3.43	Peptide-transportingATPase			3.6.3.44	Xenobiotic-transportingATPase	3.6.3.42	Beta-glucan-transportingATPase
ETH_00013375	1.1.1.26	Glyoxylatereductase			1.1.1.95	Phosphoglyceratedehydrogenase	1.1.1.-
ETH_00013700	5.3.4.1	Proteindisulfide-isomerase	5.3.4.1	Proteindisulfide-isomerase	5.3.4.1	Proteindisulfide-isomerase	5.3.4.1	Proteindisulfide-isomerase
ETH_00016405	2.7.11.25	Mitogen-activatedproteinkinasekinasekinase			2.7.11.24	Mitogen-activatedproteinkinase
ETH_00011010					2.7.7.49	RNA-directedDNApolymerase
ETH_00019485	1.1.1.184	Carbonylreductase(NADPH)			1.1.1.197	15-hydroxyprostaglandindehydrogenase(NADP(+))	1.1.1.189	Prostaglandin-E(2)9-reductase
ETH_00024460	2.4.2.8	Hypoxanthinephosphoribosyltransferase	2.4.2.8	Hypoxanthinephosphoribosyltransferase	2.4.2.8	Hypoxanthinephosphoribosyltransferase	2.7.1.106	Glucose-1,6-bisphosphatesynthase
ETH_00040785	6.3.2.3	Glutathionesynthase			6.3.2.3	Glutathionesynthase
ETH_00033530	3.4.22.15	CathepsinL			3.4.22.15	CathepsinL
ETH_00032220			3.4.21.105	Rhomboidprotease	3.4.21.105	Rhomboidprotease	3.4.21.105	Rhomboidprotease
ETH_00005720					2.4.1.79	Globotriaosylceramide3-beta-N-acetylgalactosaminyltransferase
ETH_00010590	3.1.3.4	Phosphatidatephosphatase			3.1.3.4	Phosphatidatephosphatase	3.1.3.4	Phosphatidatephosphatase
ETH_00016585	2.7.11.1	Non-specificserine/threonineproteinkinase			2.7.11.1	Non-specificserine/threonineproteinkinase	2.7.11.1	Non-specificserine/threonineproteinkinase
ETH_00033100	2.7.11.1	Non-specificserine/threonineproteinkinase			2.7.10.1	Receptorprotein-tyrosinekinase
ETH_00034160	1.1.1.1	Alcoholdehydrogenase			1.1.1.284	S-(hydroxymethyl)glutathionedehydrogenase	1.1.1.284	S-(hydroxymethyl)glutathionedehydrogenase
ETH_00036125	2.7.11.1	Non-specificserine/threonineproteinkinase			2.7.11.1	Non-specificserine/threonineproteinkinase	2.7.11.17	Calcium/calmodulin-dependentproteinkinase
ETH_00043030	1.6.5.5	NADPH:quinonereductase			1.6.5.5	NADPH:quinonereductase	1.6.5.5	NADPH:quinonereductase
ETH_00006600					2.7.7.49	RNA-directedDNApolymerase
ETH_00031935	2.7.11.1	Non-specificserine/threonineproteinkinase			2.7.11.17	Calcium/calmodulin-dependentproteinkinase	2.7.11.17	Calcium/calmodulin-dependentproteinkinase
ETH_00032260	2.7.2.11	Glutamate5-kinase	2.7.2.11	Glutamate5-kinase	2.7.2.11	Glutamate5-kinase	2.7.2.11	Glutamate5-kinase
ETH_00010960	3.6.3.28	Phosphonate-transportingATPase			3.6.3.28	Phosphonate-transportingATPase	3.6.3.28	Phosphonate-transportingATPase
ETH_00029535	3.6.4.6	Vesicle-fusingATPase			3.6.4.6	Vesicle-fusingATPase	3.6.4.6	Vesicle-fusingATPase
ETH_00010810					2.7.7.49	RNA-directedDNApolymerase
ETH_00034675	3.1.2.15		3.1.2.15		3.1.2.15		3.1.2.15
ETH_00008130	2.1.1.43	Histone-lysineN-methyltransferase	2.1.1.43	Histone-lysineN-methyltransferase	2.1.1.43	Histone-lysineN-methyltransferase	2.1.1.43	Histone-lysineN-methyltransferase
ETH_00016890	3.4.21.62	Subtilisin			3.4.21.66	Thermitase	3.4.21.62	Subtilisin
ETH_00011625	3.6.1.3	Adenosinetriphosphatase			3.6.4.3	Microtubule-severingATPase	3.6.4.3	Microtubule-severingATPase
ETH_00017290					2.7.7.49	RNA-directedDNApolymerase
ETH_00035080	2.7.11.1	Non-specificserine/threonineproteinkinase			2.7.12.1	Dual-specificitykinase	2.7.11.1	Non-specificserine/threonineproteinkinase
ETH_00042285	2.7.11.22	Cyclin-dependentkinase			2.7.11.22	Cyclin-dependentkinase	2.7.11.23	[RNA-polymerase]-subunitkinase
ETH_00005740	2.7.11.1	Non-specificserine/threonineproteinkinase			2.7.12.1	Dual-specificitykinase
ETH_00028160	4.6.1.1	Adenylatecyclase			4.6.1.2	Guanylatecyclase	3.6.3.1	Phospholipid-translocatingATPase
ETH_00000665	2.3.3.1	Citrate(Si)-synthase			2.3.3.1	Citrate(Si)-synthase	2.3.3.1, 2.3.3.5	Citrate(Si)-synthase, 2-methylcitratesynthase
ETH_00001275	1.8.1.2	Sulfitereductase(NADPH)			1.6.2.4	NADPH--hemoproteinreductase	1.6.2.4	NADPH--hemoproteinreductase
ETH_00012930	3.6.3.44	Xenobiotic-transportingATPase	3.6.3.44	Xenobiotic-transportingATPase	3.6.3.44	Xenobiotic-transportingATPase	3.6.3.36	Taurine-transportingATPase
ETH_00025015	3.6.4.3	Microtubule-severingATPase			3.6.4.3	Microtubule-severingATPase	3.6.4.3	Microtubule-severingATPase
ETH_00017240					3.6.3.14	H(+)-transportingtwo-sectorATPase	3.6.3.14	H(+)-transportingtwo-sectorATPase
ETH_00002805	3.5.1.89	N-acetylglucosaminylphosphatidylinositoldeacetylase			3.5.1.89	N-acetylglucosaminylphosphatidylinositoldeacetylase	3.5.1.89	N-acetylglucosaminylphosphatidylinositoldeacetylase
ETH_00000480					3.5.4.12	dCMPdeaminase	3.5.4.12	dCMPdeaminase
ETH_00027050	2.8.1.2	3-mercaptopyruvatesulfurtransferase			2.8.1.2	3-mercaptopyruvatesulfurtransferase	2.8.1.1	Thiosulfatesulfurtransferase
ETH_00043550	3.6.1.1	Inorganicdiphosphatase	3.6.1.1	Inorganicdiphosphatase	3.6.1.1	Inorganicdiphosphatase	3.6.1.1	Inorganicdiphosphatase
ETH_00021765	3.6.3.30	Fe(3+)-transportingATPase			3.6.3.28	Phosphonate-transportingATPase	3.6.3.28	Phosphonate-transportingATPase
ETH_00023850	3.1.13.1	ExoribonucleaseII	3.1.13.1	ExoribonucleaseII	3.1.13.1	ExoribonucleaseII	3.1.13.1	ExoribonucleaseII
ETH_00001015	5.2.1.8	Peptidylprolylisomerase	5.2.1.8	Peptidylprolylisomerase	5.2.1.8	Peptidylprolylisomerase	5.2.1.8	Peptidylprolylisomerase
ETH_00043585	2.7.7.15	Choline-phosphatecytidylyltransferase			2.7.7.15	Choline-phosphatecytidylyltransferase	2.7.7.15	Choline-phosphatecytidylyltransferase
ETH_00026640	6.1.1.5	Isoleucine--tRNAligase			6.1.1.5	Isoleucine--tRNAligase	6.1.1.5	Isoleucine--tRNAligase
ETH_00038820	3.4.11.2	Membranealanylaminopeptidase			3.4.11.2	Membranealanylaminopeptidase	3.4.11.2	Membranealanylaminopeptidase
ETH_00020440					2.7.7.49	RNA-directedDNApolymerase
ETH_00027760	1.1.1.57	Fructuronatereductase			1.1.1.57	Fructuronatereductase
ETH_00025200	2.7.11.12	cGMP-dependentproteinkinase			2.7.11.12	cGMP-dependentproteinkinase	2.7.11.12	cGMP-dependentproteinkinase
ETH_00025210	1.2.1.3	Aldehydedehydrogenase(NAD(+))	1.5.1.12	1-pyrroline-5-carboxylatedehydrogenase	1.2.1.3	Aldehydedehydrogenase(NAD(+))	1.2.1.3	Aldehydedehydrogenase(NAD(+))
ETH_00021935					2.7.7.49	RNA-directedDNApolymerase
ETH_00029355					2.7.7.49	RNA-directedDNApolymerase
ETH_00030465	3.6.3.31	Polyamine-transportingATPase			3.6.3.31	Polyamine-transportingATPase
ETH_00012090	1.1.1.184	Carbonylreductase(NADPH)			1.1.1.189	Prostaglandin-E(2)9-reductase	1.1.1.189	Prostaglandin-E(2)9-reductase
ETH_00029050	6.3.2.19	Ubiquitin--proteinligase	6.3.2.19	Ubiquitin--proteinligase	6.3.2.19	Ubiquitin--proteinligase	6.3.2.19	Ubiquitin--proteinligase
ETH_00003830	2.5.1.54	3-deoxy-7-phosphoheptulonatesynthase			2.5.1.54	3-deoxy-7-phosphoheptulonatesynthase	2.5.1.54	3-deoxy-7-phosphoheptulonatesynthase
ETH_00020890	3.4.11.18	Methionylaminopeptidase			3.4.11.18	Methionylaminopeptidase	3.4.11.18	Methionylaminopeptidase
ETH_00004770	2.7.7.7	DNA-directedDNApolymerase	2.7.7.7	DNA-directedDNApolymerase	2.7.7.7	DNA-directedDNApolymerase	2.7.7.7	DNA-directedDNApolymerase
ETH_00031750	6.3.2.1	Pantoate--beta-alanineligase	6.3.2.1	Pantoate--beta-alanineligase	6.3.2.1	Pantoate--beta-alanineligase	6.3.2.1	Pantoate--beta-alanineligase
ETH_00000560	3.1.3.11	Fructose-bisphosphatase			3.1.3.11	Fructose-bisphosphatase	3.1.3.11	Fructose-bisphosphatase
ETH_00005000			3.1.2.15		3.1.2.15		3.1.2.15
ETH_00012075	3.1.2.15		3.1.2.15		3.1.2.15		3.1.2.15
ETH_00035190	2.1.1.48		2.1.1.48		2.1.1.48		2.1.1.48
ETH_00005725					2.4.1.79	Globotriaosylceramide3-beta-N-acetylgalactosaminyltransferase
ETH_00014950	2.7.11.2	[Pyruvatedehydrogenase(acetyl-transferring)]kinase			2.7.11.2	[Pyruvatedehydrogenase(acetyl-transferring)]kinase	2.7.11.4	[3-methyl-2-oxobutanoatedehydrogenase(acetyl-transferring)]kinase
ETH_00013775	2.7.7.25				2.7.7.25		2.7.7.25
ETH_00001725	3.4.23.15	Renin			3.4.23.5	CathepsinD	3.4.23.34, 3.4.23.5	CathepsinE, CathepsinD
ETH_00035125	2.8.1.7	Cysteinedesulfurase	2.8.1.7	Cysteinedesulfurase	2.8.1.7	Cysteinedesulfurase	2.8.1.7	Cysteinedesulfurase
ETH_00012445					2.7.1.26	Riboflavinkinase	2.7.1.26	Riboflavinkinase
ETH_00014010					2.7.7.49	RNA-directedDNApolymerase
ETH_00025705	5.3.4.1	Proteindisulfide-isomerase	5.3.4.1	Proteindisulfide-isomerase	5.3.4.1	Proteindisulfide-isomerase	1.8.4.9	Adenylyl-sulfatereductase(glutathione)
ETH_00028045	2.1.1.43	Histone-lysineN-methyltransferase	2.1.1.43	Histone-lysineN-methyltransferase	2.1.1.43	Histone-lysineN-methyltransferase	2.1.1.43	Histone-lysineN-methyltransferase
ETH_00030565	2.7.11.1	Non-specificserine/threonineproteinkinase	2.7.10.2	Non-specificprotein-tyrosinekinase	2.7.11.25	Mitogen-activatedproteinkinasekinasekinase	2.7.11.25	Mitogen-activatedproteinkinasekinasekinase
ETH_00034370	1.8.4.12	Peptide-methionine(R)-S-oxidereductase	1.8.4.12	Peptide-methionine(R)-S-oxidereductase	1.8.4.6		1.8.4.12	Peptide-methionine(R)-S-oxidereductase
ETH_00040280	5.1.3.1	Ribulose-phosphate3-epimerase	5.1.3.1	Ribulose-phosphate3-epimerase	5.1.3.1	Ribulose-phosphate3-epimerase	5.1.3.1	Ribulose-phosphate3-epimerase
ETH_00001445	2.7.11.1	Non-specificserine/threonineproteinkinase			2.7.11.1	Non-specificserine/threonineproteinkinase	2.7.11.25	Mitogen-activatedproteinkinasekinasekinase
ETH_00002325	3.1.3.16	Phosphoproteinphosphatase			3.1.3.16	Phosphoproteinphosphatase	3.1.3.16	Phosphoproteinphosphatase
ETH_00022460	3.4.19.9	Gamma-glutamylhydrolase			3.4.19.9	Gamma-glutamylhydrolase
ETH_00036350	3.1.3.16	Phosphoproteinphosphatase	3.1.3.16	Phosphoproteinphosphatase	3.1.3.16	Phosphoproteinphosphatase	3.1.3.16	Phosphoproteinphosphatase
ETH_00006785	3.4.25.1	Proteasomeendopeptidasecomplex	3.4.25.1	Proteasomeendopeptidasecomplex	3.4.25.1	Proteasomeendopeptidasecomplex	3.4.25.1	Proteasomeendopeptidasecomplex
ETH_00011170	3.1.3.48	Protein-tyrosine-phosphatase			3.1.3.16	Phosphoproteinphosphatase	3.1.3.48	Protein-tyrosine-phosphatase
ETH_00043715					3.6.3.14	H(+)-transportingtwo-sectorATPase	3.6.3.14	H(+)-transportingtwo-sectorATPase
ETH_00002255	6.3.2.19	Ubiquitin--proteinligase	6.3.2.19	Ubiquitin--proteinligase	6.3.2.19	Ubiquitin--proteinligase	6.3.2.19	Ubiquitin--proteinligase
ETH_00012965	3.1.3.25	Inositol-phosphatephosphatase			3.1.3.25	Inositol-phosphatephosphatase	3.1.3.25	Inositol-phosphatephosphatase
ETH_00029250	3.5.1.11	Penicillinamidase			3.5.1.11	Penicillinamidase	3.5.1.11	Penicillinamidase
ETH_00009485	3.6.3.44	Xenobiotic-transportingATPase	3.6.3.33	VitaminB12-transportingATPase	3.6.3.44	Xenobiotic-transportingATPase	3.6.3.42	Beta-glucan-transportingATPase
ETH_00031300	2.7.1.107	Diacylglycerolkinase	2.7.1.107	Diacylglycerolkinase	2.7.1.107	Diacylglycerolkinase	2.7.1.107	Diacylglycerolkinase
ETH_00038830	2.7.11.1	Non-specificserine/threonineproteinkinase	2.7.10.2	Non-specificprotein-tyrosinekinase	2.7.11.17	Calcium/calmodulin-dependentproteinkinase	2.3.1.23	1-acylglycerophosphocholineO-acyltransferase
ETH_00039855	2.7.11.1	Non-specificserine/threonineproteinkinase			2.7.11.1	Non-specificserine/threonineproteinkinase	2.7.11.17	Calcium/calmodulin-dependentproteinkinase
ETH_00012715	3.1.26.4	RibonucleaseH	3.1.26.4	RibonucleaseH	3.1.26.4	RibonucleaseH	3.1.26.4	RibonucleaseH
ETH_00030380					3.2.1.33	Amylo-alpha-1,6-glucosidase	2.4.1.25	4-alpha-glucanotransferase
ETH_00031180					2.7.7.49	RNA-directedDNApolymerase
ETH_00016795	3.6.3.44	Xenobiotic-transportingATPase			3.6.3.44	Xenobiotic-transportingATPase	3.6.3.27, 3.6.3.42	Phosphate-transportingATPase, Beta-glucan-transportingATPase
ETH_00021505	2.1.1.100	Protein-S-isoprenylcysteineO-methyltransferase			2.1.1.100	Protein-S-isoprenylcysteineO-methyltransferase	2.3.1.48	Histoneacetyltransferase
ETH_00030480	3.4.21.92	EndopeptidaseClp	3.4.21.92	EndopeptidaseClp	3.4.21.92	EndopeptidaseClp	3.4.21.92	EndopeptidaseClp
ETH_00013395					2.7.7.49	RNA-directedDNApolymerase
ETH_00026820	2.6.1.85	Aminodeoxychorismatesynthase			4.1.3.27	Anthranilatesynthase	4.1.3.27	Anthranilatesynthase
ETH_00019750					3.4.14.1	Dipeptidyl-peptidaseI	3.4.14.1	Dipeptidyl-peptidaseI
ETH_00014560	2.7.7.4	Sulfateadenylyltransferase			2.7.7.4	Sulfateadenylyltransferase
ETH_00021820	3.4.25.1	Proteasomeendopeptidasecomplex	3.4.25.1	Proteasomeendopeptidasecomplex	3.4.25.1	Proteasomeendopeptidasecomplex	3.4.25.1	Proteasomeendopeptidasecomplex
ETH_00025675	2.7.11.1	Non-specificserine/threonineproteinkinase			2.7.11.25	Mitogen-activatedproteinkinasekinasekinase	2.7.11.1	Non-specificserine/threonineproteinkinase
ETH_00013205	6.1.1.19	Arginine--tRNAligase	6.1.1.19	Arginine--tRNAligase	6.1.1.19	Arginine--tRNAligase	6.1.1.19	Arginine--tRNAligase
ETH_00021535	3.4.25.1	Proteasomeendopeptidasecomplex	3.4.25.1	Proteasomeendopeptidasecomplex	3.4.25.1	Proteasomeendopeptidasecomplex	3.4.25.1	Proteasomeendopeptidasecomplex
ETH_00010275	2.7.7.41	Phosphatidatecytidylyltransferase	2.7.7.41	Phosphatidatecytidylyltransferase	2.7.7.41	Phosphatidatecytidylyltransferase	2.7.7.41	Phosphatidatecytidylyltransferase
ETH_00036455	2.7.7.41	Phosphatidatecytidylyltransferase			2.7.7.41	Phosphatidatecytidylyltransferase	2.7.7.41	Phosphatidatecytidylyltransferase
ETH_00003080	4.3.2.2	Adenylosuccinatelyase			4.3.2.2	Adenylosuccinatelyase	4.3.2.2	Adenylosuccinatelyase
ETH_00032805	3.6.3.44	Xenobiotic-transportingATPase			3.6.3.44	Xenobiotic-transportingATPase	3.6.3.25, 3.6.3.28	Sulfate-transportingATPase, Phosphonate-transportingATPase
ETH_00013885	5.3.4.1	Proteindisulfide-isomerase	5.3.4.1	Proteindisulfide-isomerase	5.3.4.1	Proteindisulfide-isomerase	5.3.4.1	Proteindisulfide-isomerase
ETH_00014780					2.7.7.49	RNA-directedDNApolymerase
ETH_00019210	6.3.2.19	Ubiquitin--proteinligase	6.3.2.19	Ubiquitin--proteinligase	6.3.2.19	Ubiquitin--proteinligase	6.3.2.19	Ubiquitin--proteinligase
ETH_00031955	2.7.11.1	Non-specificserine/threonineproteinkinase	2.7.10.2	Non-specificprotein-tyrosinekinase	2.7.11.1	Non-specificserine/threonineproteinkinase
ETH_00042130					2.7.7.49	RNA-directedDNApolymerase
ETH_00022440	3.1.26.11	RibonucleaseZ	3.1.26.11	RibonucleaseZ	3.1.26.11	RibonucleaseZ	3.1.26.11	RibonucleaseZ
ETH_00005975	3.1.4.17	3',5'-cyclic-nucleotidephosphodiesterase			3.1.4.17	3',5'-cyclic-nucleotidephosphodiesterase	3.1.4.17	3',5'-cyclic-nucleotidephosphodiesterase
ETH_00012105	3.1.11.2	ExodeoxyribonucleaseIII			3.1.11.2	ExodeoxyribonucleaseIII	3.1.11.2	ExodeoxyribonucleaseIII
ETH_00018220					2.7.7.49	RNA-directedDNApolymerase
ETH_00012870	1.18.1.2	Ferredoxin--NADP(+)reductase			1.18.1.2	Ferredoxin--NADP(+)reductase	1.18.1.2	Ferredoxin--NADP(+)reductase
ETH_00027075					2.7.7.49	RNA-directedDNApolymerase
ETH_00005055	3.1.4.17	3',5'-cyclic-nucleotidephosphodiesterase			3.1.4.17	3',5'-cyclic-nucleotidephosphodiesterase
ETH_00008445	2.7.11.1	Non-specificserine/threonineproteinkinase	2.7.10.2	Non-specificprotein-tyrosinekinase	2.7.11.1	Non-specificserine/threonineproteinkinase	2.7.11.17, 2.7.11.25, 2.7.12.2	Calcium/calmodulin-dependentproteinkinase, Mitogen-activatedproteinkinasekinasekinase, Mitogen-activatedproteinkinasekinase
ETH_00012160					2.7.7.49	RNA-directedDNApolymerase
ETH_00016605	2.7.7.7	DNA-directedDNApolymerase	2.7.7.7	DNA-directedDNApolymerase	2.7.7.7	DNA-directedDNApolymerase	2.7.7.7	DNA-directedDNApolymerase
ETH_00001065	2.7.4.6	Nucleoside-diphosphatekinase	2.7.4.6	Nucleoside-diphosphatekinase	2.7.4.6	Nucleoside-diphosphatekinase	2.7.4.6	Nucleoside-diphosphatekinase
ETH_00012175					2.7.7.49	RNA-directedDNApolymerase
ETH_00015640	1.1.1.62	Estradiol17-beta-dehydrogenase			1.1.1.62	Estradiol17-beta-dehydrogenase	1.1.1.62	Estradiol17-beta-dehydrogenase
ETH_00000580	2.7.11.11	cAMP-dependentproteinkinase			2.7.11.11	cAMP-dependentproteinkinase	6.3.2.25	Tubulin--tyrosineligase
ETH_00009725	1.2.1.3	Aldehydedehydrogenase(NAD(+))			1.2.1.3	Aldehydedehydrogenase(NAD(+))	1.2.1.8	Betaine-aldehydedehydrogenase
ETH_00024685	5.4.2.1	Phosphoglyceratemutase	5.4.2.1	Phosphoglyceratemutase	5.4.2.1	Phosphoglyceratemutase	5.4.2.1	Phosphoglyceratemutase
ETH_00012295					2.7.11.1	Non-specificserine/threonineproteinkinase	2.7.11.17	Calcium/calmodulin-dependentproteinkinase
ETH_00015625	2.7.7.7	DNA-directedDNApolymerase			2.7.7.7	DNA-directedDNApolymerase	2.7.7.7	DNA-directedDNApolymerase
ETH_00030680	3.6.4.3	Microtubule-severingATPase			3.6.4.3	Microtubule-severingATPase	3.6.4.3	Microtubule-severingATPase
ETH_00031415	2.7.11.1	Non-specificserine/threonineproteinkinase			2.7.11.7	[Myosinheavy-chain]kinase
ETH_00038670	3.6.3.8	Calcium-transportingATPase			3.6.3.8	Calcium-transportingATPase	3.6.3.8	Calcium-transportingATPase
ETH_00003690	2.7.11.7	[Myosinheavy-chain]kinase			2.7.11.7	[Myosinheavy-chain]kinase	2.4.1.37	Fucosylgalactoside3-alpha-galactosyltransferase
ETH_00039620	1.11.1.6	Catalase			1.11.1.6	Catalase	1.11.1.6	Catalase
ETH_00043185	4.2.99.18	DNA-(apurinicorapyrimidinicsite)lyase			4.2.99.18	DNA-(apurinicorapyrimidinicsite)lyase	4.2.99.18	DNA-(apurinicorapyrimidinicsite)lyase
ETH_00026505	3.1.3.48	Protein-tyrosine-phosphatase			3.1.3.48	Protein-tyrosine-phosphatase
ETH_00004185	3.1.3.16	Phosphoproteinphosphatase			3.1.3.16	Phosphoproteinphosphatase	3.1.3.43	[Pyruvatedehydrogenase(acetyl-transferring)]-phosphatase
ETH_00009270	3.4.21.62	Subtilisin			3.4.21.66	Thermitase	3.4.24.35	GelatinaseB
ETH_00025875					2.7.7.49	RNA-directedDNApolymerase
ETH_00020765	1.3.99.5				1.3.99.5		1.3.99.5
ETH_00024730	1.1.1.21	Aldehydereductase			1.1.1.21	Aldehydereductase	1.1.1.274	2,5-didehydrogluconatereductase
ETH_00010675	4.2.1.1	Carbonatedehydratase			4.2.1.1	Carbonatedehydratase	4.2.1.1	Carbonatedehydratase
ETH_00016780	2.7.11.1	Non-specificserine/threonineproteinkinase			2.7.11.11	cAMP-dependentproteinkinase	2.7.11.11	cAMP-dependentproteinkinase
ETH_00026805	2.3.1.51	1-acylglycerol-3-phosphateO-acyltransferase			2.3.1.51	1-acylglycerol-3-phosphateO-acyltransferase	2.3.1.51	1-acylglycerol-3-phosphateO-acyltransferase
ETH_00027670	3.1.1.1	Carboxylesterase			3.1.1.1	Carboxylesterase	3.1.1.1	Carboxylesterase
ETH_00030970	2.3.1.12	Dihydrolipoyllysine-residueacetyltransferase			2.3.1.12	Dihydrolipoyllysine-residueacetyltransferase	4.1.1.70	Glutaconyl-CoAdecarboxylase
ETH_00038780					2.4.1.25	4-alpha-glucanotransferase	2.4.1.25	4-alpha-glucanotransferase
ETH_00007310	3.1.2.15		3.1.2.15		3.1.2.15		3.1.2.15
ETH_00020760	3.1.3.16	Phosphoproteinphosphatase			3.1.3.16	Phosphoproteinphosphatase	3.1.3.16	Phosphoproteinphosphatase
ETH_00021015	2.5.1.58	Proteinfarnesyltransferase			2.5.1.60	ProteingeranylgeranyltransferasetypeII	2.5.1.60	ProteingeranylgeranyltransferasetypeII
ETH_00033740					2.4.1.18	1,4-alpha-glucanbranchingenzyme	2.4.1.18	1,4-alpha-glucanbranchingenzyme
ETH_00029395					2.7.7.49	RNA-directedDNApolymerase
ETH_00032335	4.1.1.23	Orotidine-5'-phosphatedecarboxylase	4.1.1.23	Orotidine-5'-phosphatedecarboxylase	4.1.1.23	Orotidine-5'-phosphatedecarboxylase	2.4.2.10, 4.1.1.23	Orotatephosphoribosyltransferase, Orotidine-5'-phosphatedecarboxylase
ETH_00002590	5.4.2.2	Phosphoglucomutase			5.4.2.8	Phosphomannomutase	2.7.1.106	Glucose-1,6-bisphosphatesynthase
ETH_00011655					2.7.7.49	RNA-directedDNApolymerase
ETH_00022945	5.3.4.1	Proteindisulfide-isomerase	5.3.4.1	Proteindisulfide-isomerase	5.3.4.1	Proteindisulfide-isomerase	2.4.1.119	Dolichyl-diphosphooligosaccharide--proteinglycotransferase
ETH_00005900	2.1.1.37	DNA(cytosine-5-)-methyltransferase	2.1.1.37	DNA(cytosine-5-)-methyltransferase	2.1.1.37	DNA(cytosine-5-)-methyltransferase	2.1.1.29
ETH_00005950	3.4.21.62	Subtilisin			3.4.21.66	Thermitase	3.4.21.66	Thermitase
ETH_00026825	2.6.1.85	Aminodeoxychorismatesynthase			6.3.5.8		4.1.3.27	Anthranilatesynthase
ETH_00028520					1.14.11.2	Procollagen-prolinedioxygenase	1.14.11.2	Procollagen-prolinedioxygenase
ETH_00040965	6.3.2.3	Glutathionesynthase			6.3.2.3	Glutathionesynthase
ETH_00003880					2.7.7.49	RNA-directedDNApolymerase
ETH_00016930					2.7.7.49	RNA-directedDNApolymerase
ETH_00015570	2.1.1.77	Protein-L-isoaspartate(D-aspartate)O-methyltransferase	2.1.1.77	Protein-L-isoaspartate(D-aspartate)O-methyltransferase	2.1.1.77	Protein-L-isoaspartate(D-aspartate)O-methyltransferase	2.1.1.77	Protein-L-isoaspartate(D-aspartate)O-methyltransferase
ETH_00004340	2.7.4.14	UMP/CMPkinase	2.7.4.14	UMP/CMPkinase	2.7.4.3	Adenylatekinase	2.7.4.14	UMP/CMPkinase
ETH_00014395	1.4.1.2	Glutamatedehydrogenase			1.4.1.2	Glutamatedehydrogenase	1.4.1.2	Glutamatedehydrogenase
ETH_00015645	2.1.1.77	Protein-L-isoaspartate(D-aspartate)O-methyltransferase	2.1.1.77	Protein-L-isoaspartate(D-aspartate)O-methyltransferase	2.1.1.77	Protein-L-isoaspartate(D-aspartate)O-methyltransferase	2.1.1.77	Protein-L-isoaspartate(D-aspartate)O-methyltransferase
ETH_00020265	2.7.4.3	Adenylatekinase	2.7.4.3	Adenylatekinase	2.7.4.10	Nucleoside-triphosphate--adenylatekinase	2.7.4.3	Adenylatekinase
ETH_00042895	2.7.11.1	Non-specificserine/threonineproteinkinase			2.7.11.1	Non-specificserine/threonineproteinkinase	2.7.11.17	Calcium/calmodulin-dependentproteinkinase
ETH_00010250	3.1.3.16	Phosphoproteinphosphatase	3.1.3.16	Phosphoproteinphosphatase	3.1.3.16	Phosphoproteinphosphatase	3.1.3.16	Phosphoproteinphosphatase
ETH_00011660					3.1.26.4	RibonucleaseH
ETH_00019070					2.7.7.49	RNA-directedDNApolymerase
ETH_00030430	6.5.1.1	DNAligase(ATP)			6.5.1.1	DNAligase(ATP)	6.5.1.1	DNAligase(ATP)
ETH_00030540	2.7.11.1	Non-specificserine/threonineproteinkinase			2.7.11.1	Non-specificserine/threonineproteinkinase
ETH_00009640	3.6.3.4	Copper-exportingATPase			3.6.3.4	Copper-exportingATPase	3.6.3.4	Copper-exportingATPase
ETH_00013750	3.1.3.16	Phosphoproteinphosphatase			3.1.3.16	Phosphoproteinphosphatase	3.1.3.16	Phosphoproteinphosphatase
ETH_00017250	2.7.4.9	dTMPkinase	2.7.4.9	dTMPkinase	2.7.4.9	dTMPkinase	2.7.4.9	dTMPkinase
ETH_00019195	1.6.5.3	NADH:ubiquinonereductase(H(+)-translocating)			1.6.99.3	NADHdehydrogenase	1.6.5.3	NADH:ubiquinonereductase(H(+)-translocating)
ETH_00019955					3.1.3.16	Phosphoproteinphosphatase	3.1.3.16	Phosphoproteinphosphatase
ETH_00026800	2.1.1.31				2.1.1.31		2.1.1.31
ETH_00028630	2.7.11.1	Non-specificserine/threonineproteinkinase			2.7.12.2	Mitogen-activatedproteinkinasekinase	2.7.12.2	Mitogen-activatedproteinkinasekinase
ETH_00030945	2.4.2.1	Purine-nucleosidephosphorylase			2.4.2.1	Purine-nucleosidephosphorylase	2.4.2.1	Purine-nucleosidephosphorylase
ETH_00032495	2.7.11.1	Non-specificserine/threonineproteinkinase			2.7.11.1	Non-specificserine/threonineproteinkinase
ETH_00020475					2.7.7.49	RNA-directedDNApolymerase
ETH_00034745					2.7.7.49	RNA-directedDNApolymerase
ETH_00022575	2.7.11.1	Non-specificserine/threonineproteinkinase			2.7.11.25	Mitogen-activatedproteinkinasekinasekinase	2.7.11.1	Non-specificserine/threonineproteinkinase
ETH_00025835					2.7.7.49	RNA-directedDNApolymerase
ETH_00041310	1.1.1.44	Phosphogluconatedehydrogenase(decarboxylating)			1.1.1.44	Phosphogluconatedehydrogenase(decarboxylating)	1.1.1.44	Phosphogluconatedehydrogenase(decarboxylating)
ETH_00001745	3.6.3.25	Sulfate-transportingATPase			3.6.3.28	Phosphonate-transportingATPase	3.6.3.28	Phosphonate-transportingATPase
ETH_00017430	2.7.7.7	DNA-directedDNApolymerase			2.7.7.7	DNA-directedDNApolymerase	2.7.7.7	DNA-directedDNApolymerase
ETH_00017170	3.1.3.48	Protein-tyrosine-phosphatase			3.1.3.16	Phosphoproteinphosphatase	3.1.3.48	Protein-tyrosine-phosphatase
ETH_00024235	3.6.1.29	Bis(5'-adenosyl)-triphosphatase			3.6.1.29	Bis(5'-adenosyl)-triphosphatase	3.6.1.29	Bis(5'-adenosyl)-triphosphatase
ETH_00034550					2.7.7.49	RNA-directedDNApolymerase
ETH_00040980	2.7.11.1	Non-specificserine/threonineproteinkinase			2.7.11.22	Cyclin-dependentkinase	2.7.11.23	[RNA-polymerase]-subunitkinase
ETH_00004765	2.7.7.7	DNA-directedDNApolymerase	2.7.7.7	DNA-directedDNApolymerase	2.7.7.7	DNA-directedDNApolymerase	2.7.7.7	DNA-directedDNApolymerase
ETH_00018975	1.7.1.1	Nitratereductase(NADH)			1.7.1.1	Nitratereductase(NADH)	1.7.1.1	Nitratereductase(NADH)
ETH_00034805					2.7.7.49	RNA-directedDNApolymerase
ETH_00029360					2.7.7.49	RNA-directedDNApolymerase
ETH_00004115					2.1.1.125	Histone-arginineN-methyltransferase	2.1.1.125	Histone-arginineN-methyltransferase
ETH_00009790					3.4.21.66	Thermitase	3.4.21.62	Subtilisin
ETH_00020635			3.1.2.15		3.1.2.15		3.1.2.15
ETH_00019830	2.4.2.1	Purine-nucleosidephosphorylase			2.4.2.1	Purine-nucleosidephosphorylase
ETH_00020690	2.7.8.15	N-acetylglucosaminephosphotransferase			2.7.8.15	N-acetylglucosaminephosphotransferase	2.7.8.15	N-acetylglucosaminephosphotransferase
ETH_00005190					2.7.11.1	Non-specificserine/threonineproteinkinase	2.7.12.2	Mitogen-activatedproteinkinasekinase
ETH_00023050	3.4.11.18	Methionylaminopeptidase	3.4.11.18	Methionylaminopeptidase	3.4.11.18	Methionylaminopeptidase	3.4.11.18	Methionylaminopeptidase
ETH_00035075	2.7.11.1	Non-specificserine/threonineproteinkinase			2.7.11.13	ProteinkinaseC	2.7.11.11	cAMP-dependentproteinkinase
ETH_00034815					2.7.7.49	RNA-directedDNApolymerase
ETH_00004780					6.2.1.3	Long-chain-fatty-acid--CoAligase
ETH_00016665	2.7.4.3	Adenylatekinase	2.7.4.3	Adenylatekinase	2.7.4.3	Adenylatekinase	2.7.4.3	Adenylatekinase
ETH_00019825	2.7.8.2	Diacylglycerolcholinephosphotransferase			2.7.8.1	Ethanolaminephosphotransferase	2.7.8.1	Ethanolaminephosphotransferase
ETH_00026495					2.7.11.22	Cyclin-dependentkinase	2.7.10.2	Non-specificprotein-tyrosinekinase
ETH_00030075	1.6.1.2	NAD(P)(+)transhydrogenase(AB-specific)			1.6.1.2	NAD(P)(+)transhydrogenase(AB-specific)	1.4.1.1, 1.6.1.2	Alaninedehydrogenase, NAD(P)(+)transhydrogenase(AB-specific)
ETH_00030295	2.4.1.18	1,4-alpha-glucanbranchingenzyme			2.4.1.21	Starchsynthase	2.4.1.18	1,4-alpha-glucanbranchingenzyme
ETH_00009730	2.4.2.3	Uridinephosphorylase			2.4.2.1	Purine-nucleosidephosphorylase	2.4.2.3	Uridinephosphorylase
ETH_00014245	2.7.8.5	CDP-diacylglycerol--glycerol-3-phosphate3-phosphatidyltransferase	2.7.8.5	CDP-diacylglycerol--glycerol-3-phosphate3-phosphatidyltransferase	2.7.8.5	CDP-diacylglycerol--glycerol-3-phosphate3-phosphatidyltransferase
ETH_00019055					2.7.7.49	RNA-directedDNApolymerase
ETH_00024915	6.1.1.20	Phenylalanine--tRNAligase	6.1.1.20	Phenylalanine--tRNAligase	6.1.1.20	Phenylalanine--tRNAligase	6.1.1.20	Phenylalanine--tRNAligase
ETH_00024980	2.7.1.149	1-phosphatidylinositol-5-phosphate4-kinase			2.7.1.68	1-phosphatidylinositol-4-phosphate5-kinase	2.7.1.149	1-phosphatidylinositol-5-phosphate4-kinase
ETH_00029400					2.7.7.49	RNA-directedDNApolymerase
ETH_00025035					2.7.7.49	RNA-directedDNApolymerase
ETH_00036590	3.6.4.3	Microtubule-severingATPase			3.6.4.3	Microtubule-severingATPase	3.6.4.3	Microtubule-severingATPase
ETH_00005960	3.6.1.17	Bis(5'-nucleosyl)-tetraphosphatase(asymmetrical)			3.6.1.17	Bis(5'-nucleosyl)-tetraphosphatase(asymmetrical)	3.6.1.17	Bis(5'-nucleosyl)-tetraphosphatase(asymmetrical)
ETH_00005540	1.1.1.42	Isocitratedehydrogenase(NADP(+))			1.1.1.42	Isocitratedehydrogenase(NADP(+))	1.1.1.42, 1.1.1.87	Isocitratedehydrogenase(NADP(+)), Homoisocitratedehydrogenase
ETH_00005915	2.3.1.43	Phosphatidylcholine--sterolO-acyltransferase			2.3.1.43	Phosphatidylcholine--sterolO-acyltransferase	2.3.1.43	Phosphatidylcholine--sterolO-acyltransferase
ETH_00034520					3.1.26.4	RibonucleaseH
ETH_00008300	3.6.1.23	dUTPdiphosphatase	3.6.1.23	dUTPdiphosphatase	3.6.1.23	dUTPdiphosphatase	3.6.1.23	dUTPdiphosphatase
ETH_00024345	3.4.25.1	Proteasomeendopeptidasecomplex	3.4.25.1	Proteasomeendopeptidasecomplex	3.4.25.1	Proteasomeendopeptidasecomplex	3.4.25.1	Proteasomeendopeptidasecomplex
ETH_00001515	6.3.2.19	Ubiquitin--proteinligase	6.3.2.19	Ubiquitin--proteinligase	6.3.2.19	Ubiquitin--proteinligase	6.3.2.19	Ubiquitin--proteinligase
ETH_00009510					2.7.7.49	RNA-directedDNApolymerase
ETH_00020840	2.7.11.22	Cyclin-dependentkinase			2.7.11.23	[RNA-polymerase]-subunitkinase
ETH_00022545	3.1.4.17	3',5'-cyclic-nucleotidephosphodiesterase			3.1.4.17	3',5'-cyclic-nucleotidephosphodiesterase	3.1.4.17	3',5'-cyclic-nucleotidephosphodiesterase
ETH_00026145					5.3.3.8	Dodecenoyl-CoAisomerase	4.2.1.17	Enoyl-CoAhydratase
ETH_00041625					6.1.1.10	Methionine--tRNAligase	6.1.1.10	Methionine--tRNAligase
ETH_00014200	2.7.11.12	cGMP-dependentproteinkinase			2.7.11.12	cGMP-dependentproteinkinase	2.7.11.12	cGMP-dependentproteinkinase
ETH_00024900	6.3.2.19	Ubiquitin--proteinligase	6.3.2.19	Ubiquitin--proteinligase	6.3.2.19	Ubiquitin--proteinligase	6.3.2.19	Ubiquitin--proteinligase
ETH_00029430	3.1.3.36	Phosphoinositide5-phosphatase			3.1.3.56	Inositol-polyphosphate5-phosphatase	3.1.3.36, 3.1.3.56	Phosphoinositide5-phosphatase, Inositol-polyphosphate5-phosphatase
ETH_00034605	3.6.3.30	Fe(3+)-transportingATPase			3.6.3.41	Heme-transportingATPase
ETH_00039145	3.6.3.20	Glycerol-3-phosphate-transportingATPase			3.6.3.28	Phosphonate-transportingATPase	3.6.3.25	Sulfate-transportingATPase
ETH_00043570					3.6.3.44	Xenobiotic-transportingATPase	3.6.3.27, 3.6.3.42	Phosphate-transportingATPase, Beta-glucan-transportingATPase
ETH_00005005	3.6.3.44	Xenobiotic-transportingATPase			3.6.3.44	Xenobiotic-transportingATPase	3.6.3.27	Phosphate-transportingATPase
ETH_00010060					2.7.11.2	[Pyruvatedehydrogenase(acetyl-transferring)]kinase	2.7.11.2	[Pyruvatedehydrogenase(acetyl-transferring)]kinase
ETH_00017090					2.7.7.49	RNA-directedDNApolymerase
ETH_00020125			3.6.3.12	Potassium-transportingATPase	3.6.3.1	Phospholipid-translocatingATPase	3.6.3.3	Cadmium-exportingATPase
ETH_00000785	3.1.3.41	4-nitrophenylphosphatase			3.1.3.41	4-nitrophenylphosphatase	3.1.3.18, 3.1.3.41	Phosphoglycolatephosphatase, 4-nitrophenylphosphatase
ETH_00010050	3.6.3.44	Xenobiotic-transportingATPase			3.6.3.44	Xenobiotic-transportingATPase	3.6.3.43	Peptide-transportingATPase
ETH_00012495	6.1.1.10	Methionine--tRNAligase			6.1.1.10	Methionine--tRNAligase
ETH_00013390					2.7.7.49	RNA-directedDNApolymerase
ETH_00017100					2.7.7.49	RNA-directedDNApolymerase
ETH_00034775	1.5.1.2	Pyrroline-5-carboxylatereductase	1.5.1.2	Pyrroline-5-carboxylatereductase	1.5.1.2	Pyrroline-5-carboxylatereductase	1.5.1.2	Pyrroline-5-carboxylatereductase
ETH_00042640	3.4.25.1	Proteasomeendopeptidasecomplex	3.4.25.1	Proteasomeendopeptidasecomplex	3.4.25.1	Proteasomeendopeptidasecomplex	3.4.25.1	Proteasomeendopeptidasecomplex
ETH_00010040					2.7.7.49	RNA-directedDNApolymerase
ETH_00014495	2.7.11.1	Non-specificserine/threonineproteinkinase	2.7.12.1	Dual-specificitykinase	2.7.11.22	Cyclin-dependentkinase	2.7.11.17	Calcium/calmodulin-dependentproteinkinase
ETH_00018160	3.1.4.17	3',5'-cyclic-nucleotidephosphodiesterase			3.1.4.17	3',5'-cyclic-nucleotidephosphodiesterase	3.1.4.17	3',5'-cyclic-nucleotidephosphodiesterase
ETH_00026650	2.7.11.1	Non-specificserine/threonineproteinkinase			2.7.11.7	[Myosinheavy-chain]kinase
ETH_00029870	3.1.3.41	4-nitrophenylphosphatase			3.1.3.41	4-nitrophenylphosphatase	3.1.3.18, 3.1.3.41	Phosphoglycolatephosphatase, 4-nitrophenylphosphatase
ETH_00004465					3.6.3.28	Phosphonate-transportingATPase	3.6.3.28	Phosphonate-transportingATPase
ETH_00005115					2.3.1.61	Dihydrolipoyllysine-residuesuccinyltransferase	2.3.1.61	Dihydrolipoyllysine-residuesuccinyltransferase
ETH_00032865	3.1.26.11	RibonucleaseZ			3.1.26.11	RibonucleaseZ	3.1.26.11	RibonucleaseZ
ETH_00034470	3.1.2.4	3-hydroxyisobutyryl-CoAhydrolase			4.2.1.17	Enoyl-CoAhydratase	3.1.2.4	3-hydroxyisobutyryl-CoAhydrolase
ETH_00002500					2.7.8.7	Holo-[acyl-carrier-protein]synthase	2.7.8.7	Holo-[acyl-carrier-protein]synthase
ETH_00026895	2.7.11.1	Non-specificserine/threonineproteinkinase			3.1.1.4	PhospholipaseA(2)	3.1.4.46	Glycerophosphodiesterphosphodiesterase
ETH_00032365	4.1.1.49	Phosphoenolpyruvatecarboxykinase(ATP)	4.1.1.49	Phosphoenolpyruvatecarboxykinase(ATP)	4.1.1.49	Phosphoenolpyruvatecarboxykinase(ATP)	4.1.1.49	Phosphoenolpyruvatecarboxykinase(ATP)
ETH_00000725					2.7.7.49	RNA-directedDNApolymerase
ETH_00005785	2.3.1.111	Mycocerosatesynthase			2.3.1.111	Mycocerosatesynthase	1.1.1.14, 2.3.1.161, 2.3.1.94	L-iditol2-dehydrogenase, Lovastatinnonaketidesynthase, 6-deoxyerythronolide-Bsynthase
ETH_00016775	1.18.1.1	Rubredoxin--NAD(+)reductase			1.18.1.3	Ferredoxin--NAD(+)reductase	1.18.1.3, 1.6.5.4	Ferredoxin--NAD(+)reductase, Monodehydroascorbatereductase(NADH)
ETH_00004270	2.7.11.1	Non-specificserine/threonineproteinkinase			2.7.11.1	Non-specificserine/threonineproteinkinase	2.7.11.21	Polokinase
ETH_00005335					2.7.11.1	Non-specificserine/threonineproteinkinase
ETH_00005575	4.2.1.17	Enoyl-CoAhydratase			4.2.1.17	Enoyl-CoAhydratase	4.2.1.17	Enoyl-CoAhydratase
ETH_00027700			2.7.10.2	Non-specificprotein-tyrosinekinase	2.7.11.1	Non-specificserine/threonineproteinkinase
ETH_00015835	3.1.1.5	Lysophospholipase			3.1.1.4	PhospholipaseA(2)	3.1.1.5	Lysophospholipase
ETH_00019075					2.7.7.49	RNA-directedDNApolymerase
ETH_00028855					2.7.11.1	Non-specificserine/threonineproteinkinase	2.7.11.13, 2.7.11.17, 2.7.11.21	ProteinkinaseC, Calcium/calmodulin-dependentproteinkinase, Polokinase
ETH_00031400	1.1.99.10	Glucosedehydrogenase(acceptor)			1.1.99.1	Cholinedehydrogenase
ETH_00034695					2.7.7.49	RNA-directedDNApolymerase
ETH_00001560	1.6.5.3	NADH:ubiquinonereductase(H(+)-translocating)			1.6.99.3	NADHdehydrogenase	1.6.5.3	NADH:ubiquinonereductase(H(+)-translocating)
ETH_00009460					2.7.11.2	[Pyruvatedehydrogenase(acetyl-transferring)]kinase	2.7.11.2	[Pyruvatedehydrogenase(acetyl-transferring)]kinase
ETH_00015230	1.3.1.34	2,4-dienoyl-CoAreductase(NADPH)			1.3.1.34	2,4-dienoyl-CoAreductase(NADPH)	1.3.1.34	2,4-dienoyl-CoAreductase(NADPH)
ETH_00021055					2.7.7.49	RNA-directedDNApolymerase
ETH_00022030	1.14.13.7	Phenol2-monooxygenase			1.14.13.50	Pentachlorophenolmonooxygenase	1.14.13.7	Phenol2-monooxygenase
ETH_00023780					2.7.1.107	Diacylglycerolkinase	2.7.1.107	Diacylglycerolkinase
ETH_00025830					2.7.7.49	RNA-directedDNApolymerase
ETH_00037640			3.1.1.29	Aminoacyl-tRNAhydrolase	3.1.1.29	Aminoacyl-tRNAhydrolase	3.1.1.29	Aminoacyl-tRNAhydrolase
ETH_00009690	1.5.1.9	Saccharopinedehydrogenase(NAD(+),L-glutamate-forming)			1.5.1.9	Saccharopinedehydrogenase(NAD(+),L-glutamate-forming)	1.5.1.-
ETH_00011525	3.1.3.16	Phosphoproteinphosphatase			3.1.3.16	Phosphoproteinphosphatase	3.1.3.16	Phosphoproteinphosphatase
ETH_00020585					2.7.11.1	Non-specificserine/threonineproteinkinase	2.7.11.13, 2.7.11.17, 2.7.11.21	ProteinkinaseC, Calcium/calmodulin-dependentproteinkinase, Polokinase
ETH_00034685					2.7.7.49	RNA-directedDNApolymerase
ETH_00004075	3.4.22.52	Calpain-1			3.4.22.52	Calpain-1	3.4.22.53	Calpain-2
ETH_00020655	4.2.1.2	Fumaratehydratase	4.2.1.2	Fumaratehydratase	4.2.1.32	L(+)-tartratedehydratase	4.2.1.2	Fumaratehydratase
ETH_00028615	2.7.11.1	Non-specificserine/threonineproteinkinase			2.7.11.1	Non-specificserine/threonineproteinkinase	2.7.11.1	Non-specificserine/threonineproteinkinase
ETH_00001360					2.7.7.49	RNA-directedDNApolymerase
ETH_00009340	2.4.2.9	Uracilphosphoribosyltransferase	2.4.2.9	Uracilphosphoribosyltransferase	2.4.2.9	Uracilphosphoribosyltransferase	2.4.2.9	Uracilphosphoribosyltransferase
ETH_00031170					2.7.7.49	RNA-directedDNApolymerase
ETH_00000690					2.7.7.49	RNA-directedDNApolymerase
ETH_00018225					2.7.7.49	RNA-directedDNApolymerase
ETH_00027705	2.7.11.1	Non-specificserine/threonineproteinkinase			2.7.11.1	Non-specificserine/threonineproteinkinase	2.7.11.13, 2.7.11.17, 2.7.11.21	ProteinkinaseC, Calcium/calmodulin-dependentproteinkinase, Polokinase
ETH_00005905					2.7.11.13	ProteinkinaseC	2.7.10.2	Non-specificprotein-tyrosinekinase
ETH_00007515					3.6.3.14	H(+)-transportingtwo-sectorATPase	3.6.3.14	H(+)-transportingtwo-sectorATPase
ETH_00010510					2.7.7.49	RNA-directedDNApolymerase
ETH_00017770	2.7.11.1	Non-specificserine/threonineproteinkinase			2.7.11.1	Non-specificserine/threonineproteinkinase	2.7.11.1	Non-specificserine/threonineproteinkinase
ETH_00027695					2.7.11.1	Non-specificserine/threonineproteinkinase
ETH_00000180	2.1.1.29				2.1.1.37	DNA(cytosine-5-)-methyltransferase	3.4.21.66	Thermitase
ETH_00001530					3.1.3.2	Acidphosphatase	3.1.3.2	Acidphosphatase
ETH_00002580	3.4.19.12	Ubiquitinylhydrolase1			3.4.19.12	Ubiquitinylhydrolase1	3.4.19.12	Ubiquitinylhydrolase1
ETH_00009635					3.6.3.4	Copper-exportingATPase	3.6.3.4	Copper-exportingATPase
ETH_00012875					1.18.1.2	Ferredoxin--NADP(+)reductase	1.18.1.2	Ferredoxin--NADP(+)reductase
ETH_00035385					3.1.26.3	RibonucleaseIII
ETH_00039565					2.1.1.48		2.1.1.48
ETH_00005015	1.3.1.38	Trans-2-enoyl-CoAreductase(NADPH)			1.3.99.5		1.3.1.38	Trans-2-enoyl-CoAreductase(NADPH)
ETH_00006025					1.18.1.3	Ferredoxin--NAD(+)reductase	1.18.1.3	Ferredoxin--NAD(+)reductase
ETH_00011685					2.7.7.49	RNA-directedDNApolymerase
ETH_00025725	3.4.23.3	Gastricsin			3.4.23.3	Gastricsin	3.4.23.34	CathepsinE
ETH_00001100					2.7.7.49	RNA-directedDNApolymerase
ETH_00000740					2.7.7.49	RNA-directedDNApolymerase
ETH_00007120	3.1.1.79	Hormone-sensitivelipase			3.1.1.79	Hormone-sensitivelipase	3.1.1.3	Triacylglycerollipase
ETH_00017505					3.5.2.6	Beta-lactamase	3.5.2.6	Beta-lactamase
ETH_00028765					2.7.11.1	Non-specificserine/threonineproteinkinase	2.7.11.13, 2.7.11.17, 2.7.11.21	ProteinkinaseC, Calcium/calmodulin-dependentproteinkinase, Polokinase
ETH_00043890	2.7.7.13	Mannose-1-phosphateguanylyltransferase			2.7.7.13	Mannose-1-phosphateguanylyltransferase	2.7.7.13	Mannose-1-phosphateguanylyltransferase
ETH_00000695					2.7.7.49	RNA-directedDNApolymerase
ETH_00024905					2.7.1.67	1-phosphatidylinositol4-kinase	2.7.1.67	1-phosphatidylinositol4-kinase
ETH_00031640	2.7.8.17	N-acetylglucosaminephosphotransferase			2.7.8.17	N-acetylglucosaminephosphotransferase	2.7.8.17	N-acetylglucosaminephosphotransferase
ETH_00012005					3.6.3.8	Calcium-transportingATPase
ETH_00018685					2.7.1.78	Polynucleotide5'-hydroxyl-kinase	2.7.1.78	Polynucleotide5'-hydroxyl-kinase
ETH_00000805	2.1.1.62	mRNA(2'-O-methyladenosine-N(6)-)-methyltransferase			2.1.1.62	mRNA(2'-O-methyladenosine-N(6)-)-methyltransferase	2.1.1.62	mRNA(2'-O-methyladenosine-N(6)-)-methyltransferase
ETH_00004145					3.1.3.56	Inositol-polyphosphate5-phosphatase	3.1.3.36, 3.1.3.56	Phosphoinositide5-phosphatase, Inositol-polyphosphate5-phosphatase
ETH_00006620					3.1.4.12	Sphingomyelinphosphodiesterase	3.1.4.12	Sphingomyelinphosphodiesterase
ETH_00007685	2.7.11.1	Non-specificserine/threonineproteinkinase			2.7.11.7	[Myosinheavy-chain]kinase
ETH_00010515					2.7.7.49	RNA-directedDNApolymerase
ETH_00012915					1.2.1.5	Aldehydedehydrogenase(NAD(P)(+))	1.2.1.3	Aldehydedehydrogenase(NAD(+))
ETH_00012955	1.3.1.25	1,6-dihydroxycyclohexa-2,4-diene-1-carboxylatedehydrogenase			1.1.1.100	3-oxoacyl-[acyl-carrier-protein]reductase
ETH_00030090	2.7.1.68	1-phosphatidylinositol-4-phosphate5-kinase			2.7.1.68	1-phosphatidylinositol-4-phosphate5-kinase
ETH_00031280					2.7.7.49	RNA-directedDNApolymerase
ETH_00034750					3.1.26.4	RibonucleaseH
ETH_00035050	2.3.1.22	2-acylglycerolO-acyltransferase			2.3.1.20	DiacylglycerolO-acyltransferase	2.3.1.20	DiacylglycerolO-acyltransferase
ETH_00006610					2.7.7.49	RNA-directedDNApolymerase
ETH_00014335	3.1.3.16	Phosphoproteinphosphatase	3.1.3.16	Phosphoproteinphosphatase	3.1.3.16	Phosphoproteinphosphatase	3.1.3.16	Phosphoproteinphosphatase
ETH_00015485					5.1.1.11	Phenylalanineracemase(ATP-hydrolyzing)	1.1.1.14, 2.3.1.161, 2.3.1.94	L-iditol2-dehydrogenase, Lovastatinnonaketidesynthase, 6-deoxyerythronolide-Bsynthase
ETH_00025360					3.6.1.15	Nucleoside-triphosphatase	2.7.7.8	Polyribonucleotidenucleotidyltransferase
ETH_00025420					4.2.1.107	hydratase	1.1.1.35, 4.2.1.107	3-hydroxyacyl-CoAdehydrogenase, hydratase
ETH_00027315					2.4.1.62	Gangliosidegalactosyltransferase
ETH_00038250	2.7.7.14	Ethanolamine-phosphatecytidylyltransferase			2.7.7.14	Ethanolamine-phosphatecytidylyltransferase	2.7.7.39	Glycerol-3-phosphatecytidylyltransferase
ETH_00043280					2.1.1.125	Histone-arginineN-methyltransferase
ETH_00004260					3.4.11.18	Methionylaminopeptidase	3.4.11.18	Methionylaminopeptidase
ETH_00015120	2.5.1.47	Cysteinesynthase			2.5.1.47	Cysteinesynthase	2.5.1.47	Cysteinesynthase
ETH_00028835					2.7.10.2	Non-specificprotein-tyrosinekinase	2.7.11.21	Polokinase
ETH_00035470					2.5.1.29	Geranylgeranyldiphosphatesynthase	2.5.1.30	Heptaprenyldiphosphatesynthase
ETH_00000870					2.7.7.49	RNA-directedDNApolymerase	2.7.7.49	RNA-directedDNApolymerase
ETH_00037120	3.6.4.3	Microtubule-severingATPase			3.6.4.6	Vesicle-fusingATPase	3.6.4.3	Microtubule-severingATPase
ETH_00000935	1.6.2.2	Cytochrome-b5reductase			1.7.1.1	Nitratereductase(NADH)	1.7.1.3	Nitratereductase(NADPH)
ETH_00001350					2.7.7.49	RNA-directedDNApolymerase
ETH_00032320	2.7.11.1	Non-specificserine/threonineproteinkinase			1.6.3.1	NAD(P)Hoxidase	2.3.1.23	1-acylglycerophosphocholineO-acyltransferase
ETH_00011475					3.6.3.8	Calcium-transportingATPase	3.6.3.9	Sodium/potassium-exchangingATPase
ETH_00024290					3.2.1.143	Poly(ADP-ribose)glycohydrolase	3.2.1.143	Poly(ADP-ribose)glycohydrolase
ETH_00034525					2.7.7.49	RNA-directedDNApolymerase
ETH_00000655					3.1.3.46	Fructose-2,6-bisphosphate2-phosphatase	5.4.2.1	Phosphoglyceratemutase
ETH_00033960	3.4.19.12	Ubiquitinylhydrolase1			3.4.19.12	Ubiquitinylhydrolase1	3.4.19.12	Ubiquitinylhydrolase1
ETH_00023135	4.6.1.1	Adenylatecyclase			3.1.3.16	Phosphoproteinphosphatase
ETH_00002360					3.1.3.16	Phosphoproteinphosphatase
ETH_00005415					2.7.11.1	Non-specificserine/threonineproteinkinase	2.7.11.21	Polokinase
ETH_00025715					1.6.3.1	NAD(P)Hoxidase	2.3.1.23	1-acylglycerophosphocholineO-acyltransferase
ETH_00026245					3.1.11.6	ExodeoxyribonucleaseVII
ETH_00027935	2.1.1.104	Caffeoyl-CoAO-methyltransferase			2.1.1.104	Caffeoyl-CoAO-methyltransferase
ETH_00036605					3.1.3.16	Phosphoproteinphosphatase	3.1.3.48	Protein-tyrosine-phosphatase
ETH_00002175	3.4.25.1	Proteasomeendopeptidasecomplex	3.4.25.1	Proteasomeendopeptidasecomplex	3.4.25.1	Proteasomeendopeptidasecomplex	3.4.25.1	Proteasomeendopeptidasecomplex
ETH_00006205	1.17.1.2	4-hydroxy-3-methylbut-2-enyldiphosphatereductase			2.7.7.8	Polyribonucleotidenucleotidyltransferase	2.7.7.8	Polyribonucleotidenucleotidyltransferase
ETH_00009515					3.1.26.4	RibonucleaseH
ETH_00013420	5.99.1.3	DNAtopoisomerase(ATP-hydrolyzing)			5.99.1.3	DNAtopoisomerase(ATP-hydrolyzing)	5.99.1.3	DNAtopoisomerase(ATP-hydrolyzing)
ETH_00015185					2.5.1.59	ProteingeranylgeranyltransferasetypeI
ETH_00025310					2.7.7.18	Nicotinate-nucleotideadenylyltransferase
ETH_00029470					2.7.7.49	RNA-directedDNApolymerase
ETH_00035355	3.6.1.3	Adenosinetriphosphatase			3.6.4.6	Vesicle-fusingATPase	3.6.4.3	Microtubule-severingATPase
ETH_00002315					2.7.11.7	[Myosinheavy-chain]kinase
ETH_00011665					2.7.7.49	RNA-directedDNApolymerase
ETH_00016090	3.4.21.7	Plasmin			3.4.21.7	Plasmin
ETH_00017285					2.7.7.49	RNA-directedDNApolymerase
ETH_00019920	2.7.11.1	Non-specificserine/threonineproteinkinase	2.7.12.1	Dual-specificitykinase	2.7.10.2	Non-specificprotein-tyrosinekinase	2.7.11.23	[RNA-polymerase]-subunitkinase
ETH_00024180	3.6.4.3	Microtubule-severingATPase			3.6.4.3	Microtubule-severingATPase	3.6.4.3	Microtubule-severingATPase
ETH_00031405					1.1.99.1	Cholinedehydrogenase	4.1.2.10	(R)-mandelonitrilelyase
ETH_00037570	2.7.1.82	Ethanolaminekinase			2.7.1.32	Cholinekinase	2.7.1.82	Ethanolaminekinase
ETH_00022325					1.3.99.22	Coproporphyrinogendehydrogenase	1.3.99.22	Coproporphyrinogendehydrogenase
ETH_00014205	2.7.11.12	cGMP-dependentproteinkinase			2.7.11.12	cGMP-dependentproteinkinase	2.7.11.12	cGMP-dependentproteinkinase
ETH_00019185	6.3.2.25	Tubulin--tyrosineligase			6.3.2.25	Tubulin--tyrosineligase	6.3.2.25	Tubulin--tyrosineligase
ETH_00032185					2.7.11.1	Non-specificserine/threonineproteinkinase	2.7.10.2	Non-specificprotein-tyrosinekinase
ETH_00024120					2.7.11.9
ETH_00030020	2.7.11.1	Non-specificserine/threonineproteinkinase			2.7.11.7	[Myosinheavy-chain]kinase
ETH_00010555					3.1.3.16	Phosphoproteinphosphatase
ETH_00004310	2.7.11.22	Cyclin-dependentkinase	2.7.11.22	Cyclin-dependentkinase	2.7.11.22	Cyclin-dependentkinase	2.7.11.23	[RNA-polymerase]-subunitkinase
ETH_00015940	6.1.1.17	Glutamate--tRNAligase	6.1.1.17	Glutamate--tRNAligase	6.1.1.18	Glutamine--tRNAligase	6.1.1.-
ETH_00023010	6.1.1.22	Asparagine--tRNAligase	6.1.1.22	Asparagine--tRNAligase	6.1.1.22	Asparagine--tRNAligase	6.1.1.22	Asparagine--tRNAligase
ETH_00005370	2.4.1.41	PolypeptideN-acetylgalactosaminyltransferase	2.4.1.41	PolypeptideN-acetylgalactosaminyltransferase	2.4.1.41	PolypeptideN-acetylgalactosaminyltransferase	2.4.1.41	PolypeptideN-acetylgalactosaminyltransferase
ETH_00002780	2.4.1.41	PolypeptideN-acetylgalactosaminyltransferase	2.4.1.41	PolypeptideN-acetylgalactosaminyltransferase	2.4.1.41	PolypeptideN-acetylgalactosaminyltransferase	2.4.1.41	PolypeptideN-acetylgalactosaminyltransferase
ETH_00005240	2.7.6.1	Ribose-phosphatediphosphokinase	2.7.6.1	Ribose-phosphatediphosphokinase	2.7.6.1	Ribose-phosphatediphosphokinase	2.7.6.1	Ribose-phosphatediphosphokinase
ETH_00020990	1.2.4.1	Pyruvatedehydrogenase(acetyl-transferring)	1.2.4.1	Pyruvatedehydrogenase(acetyl-transferring)	1.2.4.1	Pyruvatedehydrogenase(acetyl-transferring)	1.2.4.1	Pyruvatedehydrogenase(acetyl-transferring)
ETH_00002785	5.4.2.2	Phosphoglucomutase	5.4.2.2	Phosphoglucomutase	5.4.2.2	Phosphoglucomutase	5.4.2.2	Phosphoglucomutase
ETH_00013840	2.7.1.40	Pyruvatekinase	2.7.1.40	Pyruvatekinase	2.7.1.40	Pyruvatekinase	2.7.1.40	Pyruvatekinase
ETH_00039380	5.4.2.1	Phosphoglyceratemutase	5.4.2.1	Phosphoglyceratemutase	5.4.2.1	Phosphoglyceratemutase	3.1.3.13	Bisphosphoglyceratephosphatase
ETH_00020695	1.3.5.1	Succinatedehydrogenase(ubiquinone)			1.3.5.1	Succinatedehydrogenase(ubiquinone)	1.3.5.1	Succinatedehydrogenase(ubiquinone)
ETH_00024340	3.1.3.11	Fructose-bisphosphatase	3.1.3.11	Fructose-bisphosphatase	3.1.3.11	Fructose-bisphosphatase	3.1.3.11	Fructose-bisphosphatase
ETH_00026685	3.6.3.1	Phospholipid-translocatingATPase	4.6.1.2	Guanylatecyclase	3.6.3.1	Phospholipid-translocatingATPase	3.6.3.1	Phospholipid-translocatingATPase
ETH_00026985	3.4.11.21	Aspartylaminopeptidase			3.4.11.21	Aspartylaminopeptidase	3.4.11.21	Aspartylaminopeptidase
ETH_00032950	3.4.24.64	Mitochondrialprocessingpeptidase			3.4.24.64	Mitochondrialprocessingpeptidase	3.4.24.64	Mitochondrialprocessingpeptidase
ETH_00034505	1.1.1.8	Glycerol-3-phosphatedehydrogenase(NAD(+))	1.1.1.8	Glycerol-3-phosphatedehydrogenase(NAD(+))	1.1.1.8	Glycerol-3-phosphatedehydrogenase(NAD(+))	1.1.1.8	Glycerol-3-phosphatedehydrogenase(NAD(+))
ETH_00028715	2.7.11.1	Non-specificserine/threonineproteinkinase	2.7.11.22	Cyclin-dependentkinase	2.7.11.26	[Tauprotein]kinase	2.7.11.26	[Tauprotein]kinase
ETH_00009955	2.7.1.1	Hexokinase			2.7.1.1	Hexokinase	2.7.1.1	Hexokinase
ETH_00011680	2.7.11.1	Non-specificserine/threonineproteinkinase			2.7.11.13	ProteinkinaseC	2.7.11.13	ProteinkinaseC
ETH_00026645	6.1.1.5	Isoleucine--tRNAligase	6.1.1.5	Isoleucine--tRNAligase	6.1.1.5	Isoleucine--tRNAligase	6.1.1.5	Isoleucine--tRNAligase
ETH_00002830	2.7.12.1	Dual-specificitykinase	2.7.12.1	Dual-specificitykinase	2.7.12.1	Dual-specificitykinase	2.7.12.1	Dual-specificitykinase
ETH_00024490	2.4.2.30	NAD(+)ADP-ribosyltransferase	2.4.2.30	NAD(+)ADP-ribosyltransferase	2.4.2.30	NAD(+)ADP-ribosyltransferase	2.4.2.30	NAD(+)ADP-ribosyltransferase
ETH_00002605	1.4.1.1	Alaninedehydrogenase			1.4.1.1	Alaninedehydrogenase	1.4.1.1, 1.6.1.2	Alaninedehydrogenase, NAD(P)(+)transhydrogenase(AB-specific)
ETH_00028465	5.99.1.3	DNAtopoisomerase(ATP-hydrolyzing)	5.99.1.3	DNAtopoisomerase(ATP-hydrolyzing)	5.99.1.3	DNAtopoisomerase(ATP-hydrolyzing)	5.99.1.3	DNAtopoisomerase(ATP-hydrolyzing)
ETH_00001825	1.1.1.49	Glucose-6-phosphatedehydrogenase	1.1.1.49	Glucose-6-phosphatedehydrogenase	1.1.1.49	Glucose-6-phosphatedehydrogenase	1.1.1.49	Glucose-6-phosphatedehydrogenase
ETH_00015660	5.1.3.2	UDP-glucose4-epimerase	5.1.3.2	UDP-glucose4-epimerase	5.1.3.2	UDP-glucose4-epimerase	5.1.3.2	UDP-glucose4-epimerase
ETH_00021785	6.1.1.5	Isoleucine--tRNAligase	6.1.1.5	Isoleucine--tRNAligase	6.1.1.5	Isoleucine--tRNAligase	6.1.1.5	Isoleucine--tRNAligase
ETH_00025530	2.4.1.15	Alpha,alpha-trehalose-phosphatesynthase(UDP-forming)			2.4.1.15	Alpha,alpha-trehalose-phosphatesynthase(UDP-forming)
ETH_00041590	3.6.3.1	Phospholipid-translocatingATPase	3.6.3.1	Phospholipid-translocatingATPase	3.6.3.1	Phospholipid-translocatingATPase	3.6.3.1	Phospholipid-translocatingATPase
ETH_00012035	1.11.1.6	Catalase	1.11.1.6	Catalase	1.11.1.6	Catalase	1.11.1.6	Catalase
ETH_00002930	6.3.2.2	Glutamate--cysteineligase	6.3.2.2	Glutamate--cysteineligase	6.3.2.2	Glutamate--cysteineligase	6.3.2.2	Glutamate--cysteineligase
ETH_00008600	4.1.2.13	Fructose-bisphosphatealdolase	4.1.2.13	Fructose-bisphosphatealdolase	4.1.2.13	Fructose-bisphosphatealdolase	4.1.2.13	Fructose-bisphosphatealdolase
ETH_00023065					3.6.1.15	Nucleoside-triphosphatase	3.6.1.15	Nucleoside-triphosphatase
ETH_00007350	4.2.1.24	Porphobilinogensynthase	4.2.1.24	Porphobilinogensynthase	4.2.1.24	Porphobilinogensynthase	4.2.1.24	Porphobilinogensynthase
ETH_00011645	6.2.1.3	Long-chain-fatty-acid--CoAligase	6.2.1.3	Long-chain-fatty-acid--CoAligase	6.2.1.3	Long-chain-fatty-acid--CoAligase	6.2.1.3	Long-chain-fatty-acid--CoAligase
ETH_00012950	2.7.11.11	cAMP-dependentproteinkinase			2.7.11.11	cAMP-dependentproteinkinase	2.7.11.11	cAMP-dependentproteinkinase
ETH_00015505	4.1.2.13	Fructose-bisphosphatealdolase	4.1.2.13	Fructose-bisphosphatealdolase	4.1.2.13	Fructose-bisphosphatealdolase	4.1.2.13	Fructose-bisphosphatealdolase
ETH_00005220	5.99.1.2	DNAtopoisomerase	5.99.1.2	DNAtopoisomerase	5.99.1.2	DNAtopoisomerase	5.99.1.2	DNAtopoisomerase
ETH_00008080	2.3.1.16	Acetyl-CoAC-acyltransferase	2.3.1.16	Acetyl-CoAC-acyltransferase	2.3.1.16	Acetyl-CoAC-acyltransferase	2.3.1.16	Acetyl-CoAC-acyltransferase
ETH_00017140	1.1.1.205	IMPdehydrogenase	1.1.1.205	IMPdehydrogenase	1.1.1.205	IMPdehydrogenase	1.1.1.205	IMPdehydrogenase
ETH_00020720	1.1.1.1	Alcoholdehydrogenase	1.1.1.1	Alcoholdehydrogenase	1.1.1.284	S-(hydroxymethyl)glutathionedehydrogenase	1.1.1.284	S-(hydroxymethyl)glutathionedehydrogenase
ETH_00003395	1.8.1.7	Glutathione-disulfidereductase			1.8.1.7	Glutathione-disulfidereductase	1.8.1.7	Glutathione-disulfidereductase
ETH_00012380	3.4.11.1	Leucylaminopeptidase	3.4.11.1	Leucylaminopeptidase	3.4.11.1	Leucylaminopeptidase	3.4.11.1	Leucylaminopeptidase
ETH_00029005	1.2.1.41	Glutamate-5-semialdehydedehydrogenase	1.2.1.41	Glutamate-5-semialdehydedehydrogenase	1.2.1.41	Glutamate-5-semialdehydedehydrogenase	1.2.1.41	Glutamate-5-semialdehydedehydrogenase
ETH_00031475	6.1.1.6	Lysine--tRNAligase	6.1.1.6	Lysine--tRNAligase	6.1.1.6	Lysine--tRNAligase	6.1.1.6	Lysine--tRNAligase
ETH_00023015	2.8.1.7	Cysteinedesulfurase	2.8.1.7	Cysteinedesulfurase	2.8.1.7	Cysteinedesulfurase	2.8.1.7	Cysteinedesulfurase
ETH_00000170	1.2.1.16	Succinate-semialdehydedehydrogenase(NAD(P)(+))			1.2.1.16	Succinate-semialdehydedehydrogenase(NAD(P)(+))	1.2.1.24	Succinate-semialdehydedehydrogenase(NAD(+))
ETH_00005790	2.3.1.94	6-deoxyerythronolide-Bsynthase			2.3.1.94	6-deoxyerythronolide-Bsynthase	1.1.1.14, 2.3.1.161, 2.3.1.94	L-iditol2-dehydrogenase, Lovastatinnonaketidesynthase, 6-deoxyerythronolide-Bsynthase
ETH_00032045	1.3.3.6	Acyl-CoAoxidase	1.3.3.6	Acyl-CoAoxidase	1.9.3.1	Cytochrome-coxidase	1.3.3.6	Acyl-CoAoxidase
ETH_00002570	3.6.3.44	Xenobiotic-transportingATPase	3.6.3.44	Xenobiotic-transportingATPase	3.6.3.44	Xenobiotic-transportingATPase	3.6.3.27, 3.6.3.42	Phosphate-transportingATPase, Beta-glucan-transportingATPase
ETH_00022355	2.6.1.2	Alaninetransaminase			2.6.1.2	Alaninetransaminase	2.6.1.2	Alaninetransaminase
ETH_00035055	2.7.11.24	Mitogen-activatedproteinkinase	2.7.11.24	Mitogen-activatedproteinkinase	2.7.11.24	Mitogen-activatedproteinkinase	2.7.11.24	Mitogen-activatedproteinkinase
ETH_00010025	2.2.1.1	Transketolase	2.2.1.1	Transketolase	2.2.1.3	Formaldehydetransketolase	2.2.1.1	Transketolase
ETH_00001545	4.2.1.47	GDP-mannose4,6-dehydratase			4.2.1.47	GDP-mannose4,6-dehydratase	4.2.1.47	GDP-mannose4,6-dehydratase
ETH_00011835	3.4.24.64	Mitochondrialprocessingpeptidase			3.4.24.64	Mitochondrialprocessingpeptidase	3.4.24.64	Mitochondrialprocessingpeptidase
ETH_00028570	6.1.1.11	Serine--tRNAligase	6.1.1.11	Serine--tRNAligase	6.1.1.11	Serine--tRNAligase	6.1.1.11	Serine--tRNAligase
ETH_00014095	4.2.1.46	dTDP-glucose4,6-dehydratase			4.2.1.46	dTDP-glucose4,6-dehydratase
ETH_00015480	2.3.1.94	6-deoxyerythronolide-Bsynthase			2.3.1.94	6-deoxyerythronolide-Bsynthase	1.1.1.14, 2.3.1.161, 2.3.1.94	L-iditol2-dehydrogenase, Lovastatinnonaketidesynthase, 6-deoxyerythronolide-Bsynthase
ETH_00014310	3.5.4.6	AMPdeaminase			3.5.4.6	AMPdeaminase	3.5.4.6	AMPdeaminase
ETH_00029170	2.7.9.5	Phosphoglucan,waterdikinase			2.7.13.3	Histidinekinase	2.7.9.4	Alpha-glucan,waterdikinase
ETH_00016495	1.2.1.12	Glyceraldehyde-3-phosphatedehydrogenase(phosphorylating)	1.2.1.12	Glyceraldehyde-3-phosphatedehydrogenase(phosphorylating)	1.2.1.12	Glyceraldehyde-3-phosphatedehydrogenase(phosphorylating)	1.2.1.12	Glyceraldehyde-3-phosphatedehydrogenase(phosphorylating)
ETH_00027905	6.1.1.4	Leucine--tRNAligase	6.1.1.4	Leucine--tRNAligase	6.1.1.4	Leucine--tRNAligase	6.1.1.4	Leucine--tRNAligase
ETH_00015140	2.7.2.3	Phosphoglyceratekinase	2.7.2.3	Phosphoglyceratekinase	2.7.2.3	Phosphoglyceratekinase	2.7.2.3	Phosphoglyceratekinase
ETH_00033375	1.4.1.4	Glutamatedehydrogenase(NADP(+))			1.4.1.4	Glutamatedehydrogenase(NADP(+))	1.4.1.4	Glutamatedehydrogenase(NADP(+))
ETH_00026155	3.6.3.14	H(+)-transportingtwo-sectorATPase	3.6.3.14	H(+)-transportingtwo-sectorATPase	3.6.3.14	H(+)-transportingtwo-sectorATPase	3.6.3.14	H(+)-transportingtwo-sectorATPase
ETH_00030245	2.1.2.1	Glycinehydroxymethyltransferase	2.1.2.1	Glycinehydroxymethyltransferase	2.1.2.1	Glycinehydroxymethyltransferase	2.1.2.1	Glycinehydroxymethyltransferase
ETH_00005205	2.6.1.13	Ornithineaminotransferase	2.6.1.11	Acetylornithinetransaminase	2.6.1.13	Ornithineaminotransferase	2.6.1.13	Ornithineaminotransferase
ETH_00020150	2.6.1.1	Aspartatetransaminase	2.6.1.1	Aspartatetransaminase	2.6.1.1	Aspartatetransaminase	2.6.1.1	Aspartatetransaminase
ETH_00008865	1.2.1.12	Glyceraldehyde-3-phosphatedehydrogenase(phosphorylating)	1.2.1.12	Glyceraldehyde-3-phosphatedehydrogenase(phosphorylating)	1.2.1.12	Glyceraldehyde-3-phosphatedehydrogenase(phosphorylating)	1.2.1.12	Glyceraldehyde-3-phosphatedehydrogenase(phosphorylating)
ETH_00017025	3.6.3.6	Proton-exportingATPase	3.6.3.6	Proton-exportingATPase	3.6.3.6	Proton-exportingATPase	3.6.3.6	Proton-exportingATPase
ETH_00031515	6.1.1.7	Alanine--tRNAligase	6.1.1.7	Alanine--tRNAligase	6.1.1.7	Alanine--tRNAligase	6.1.1.7	Alanine--tRNAligase
ETH_00009260	6.4.1.2	Acetyl-CoAcarboxylase			6.3.4.14	Biotincarboxylase	4.1.1.70, 6.4.1.1	Glutaconyl-CoAdecarboxylase, Pyruvatecarboxylase
ETH_00019125	2.6.1.16	Glutamine--fructose-6-phosphatetransaminase(isomerizing)	2.6.1.16	Glutamine--fructose-6-phosphatetransaminase(isomerizing)	2.6.1.16	Glutamine--fructose-6-phosphatetransaminase(isomerizing)	2.6.1.16	Glutamine--fructose-6-phosphatetransaminase(isomerizing)
ETH_00028960					3.4.21.26	Prolyloligopeptidase	3.4.21.26	Prolyloligopeptidase
ETH_00007785	2.5.1.26	Alkylglycerone-phosphatesynthase			2.5.1.26	Alkylglycerone-phosphatesynthase
ETH_00010890	2.5.1.26	Alkylglycerone-phosphatesynthase			2.5.1.26	Alkylglycerone-phosphatesynthase
ETH_00011145	2.7.1.40	Pyruvatekinase	2.7.1.40	Pyruvatekinase	2.7.1.40	Pyruvatekinase	2.7.1.40	Pyruvatekinase
ETH_00028950	1.8.1.4	Dihydrolipoyldehydrogenase	1.8.1.4	Dihydrolipoyldehydrogenase	1.8.1.4	Dihydrolipoyldehydrogenase	1.8.1.4	Dihydrolipoyldehydrogenase
ETH_00007880	2.7.7.6	DNA-directedRNApolymerase					2.7.7.6, 3.5.1.16	DNA-directedRNApolymerase, Acetylornithinedeacetylase
ETH_00011755	2.7.7.6	DNA-directedRNApolymerase					2.7.7.6, 3.5.1.16	DNA-directedRNApolymerase, Acetylornithinedeacetylase
ETH_00013935	2.7.7.6	DNA-directedRNApolymerase					2.7.7.6	DNA-directedRNApolymerase
ETH_00019030	2.7.7.6	DNA-directedRNApolymerase					2.7.7.6	DNA-directedRNApolymerase
ETH_00028265	4.6.1.1	Adenylatecyclase	4.6.1.1	Adenylatecyclase
ETH_00025695	3.6.5.5	DynaminGTPase
ETH_00009370	3.5.1.98	Histonedeacetylase	3.5.1.98	Histonedeacetylase			3.5.1.98	Histonedeacetylase
ETH_00022430	2.7.7.6	DNA-directedRNApolymerase					2.7.7.6	DNA-directedRNApolymerase
ETH_00004055	2.4.1.198	PhosphatidylinositolN-acetylglucosaminyltransferase					2.4.1.198	PhosphatidylinositolN-acetylglucosaminyltransferase
ETH_00030175	2.7.7.6	DNA-directedRNApolymerase					2.7.7.6	DNA-directedRNApolymerase
ETH_00011750	2.7.7.6	DNA-directedRNApolymerase					2.7.7.6, 3.5.1.16	DNA-directedRNApolymerase, Acetylornithinedeacetylase
ETH_00022135	2.7.7.64	UTP-monosaccharide-1-phosphateuridylyltransferase					2.7.7.64	UTP-monosaccharide-1-phosphateuridylyltransferase
ETH_00005940	3.1.3.16	Phosphoproteinphosphatase	3.1.3.16	Phosphoproteinphosphatase			3.1.3.16	Phosphoproteinphosphatase
ETH_00015285	2.3.1.48	Histoneacetyltransferase	2.3.1.48	Histoneacetyltransferase			2.3.1.48	Histoneacetyltransferase
ETH_00015850	2.7.11.1	Non-specificserine/threonineproteinkinase
ETH_00012125	2.7.11.1	Non-specificserine/threonineproteinkinase
ETH_00021495	2.7.11.1	Non-specificserine/threonineproteinkinase
ETH_00017965	2.7.11.1	Non-specificserine/threonineproteinkinase
ETH_00033305	2.1.1.29						2.1.1.29
ETH_00011215	2.7.11.1	Non-specificserine/threonineproteinkinase
ETH_00007235	2.4.1.119	Dolichyl-diphosphooligosaccharide--proteinglycotransferase					2.4.1.119	Dolichyl-diphosphooligosaccharide--proteinglycotransferase
ETH_00024165	2.4.2.11	Nicotinatephosphoribosyltransferase	2.4.2.11	Nicotinatephosphoribosyltransferase			2.4.2.11	Nicotinatephosphoribosyltransferase
ETH_00015900	2.7.11.1	Non-specificserine/threonineproteinkinase
ETH_00022425	2.7.7.6	DNA-directedRNApolymerase					2.7.7.6	DNA-directedRNApolymerase
ETH_00031485	2.3.1.48	Histoneacetyltransferase	2.3.1.48	Histoneacetyltransferase			2.3.1.48	Histoneacetyltransferase
ETH_00014420	1.4.1.2	Glutamatedehydrogenase					1.4.1.2	Glutamatedehydrogenase
ETH_00000290	2.7.7.7	DNA-directedDNApolymerase	2.7.7.7	DNA-directedDNApolymerase			2.7.7.7	DNA-directedDNApolymerase
ETH_00009555	2.7.10.2	Non-specificprotein-tyrosinekinase
ETH_00024815	2.3.1.48	Histoneacetyltransferase	2.3.1.48	Histoneacetyltransferase
ETH_00001810	2.1.1.29						2.1.1.29
ETH_00006285	2.7.7.6	DNA-directedRNApolymerase					2.7.7.6	DNA-directedRNApolymerase
ETH_00004695	3.2.1.1	Alpha-amylase					3.2.1.1	Alpha-amylase
ETH_00008095	3.5.1.98	Histonedeacetylase	3.5.1.98	Histonedeacetylase			3.5.1.98	Histonedeacetylase
ETH_00025940	2.1.1.31		2.1.1.31				2.1.1.31
ETH_00038095	3.1.3.16	Phosphoproteinphosphatase	3.1.3.16	Phosphoproteinphosphatase			3.1.3.16	Phosphoproteinphosphatase
ETH_00035460	2.8.1.8	Lipoylsynthase	2.8.1.8	Lipoylsynthase			2.8.1.8	Lipoylsynthase
ETH_00015760	5.2.1.8	Peptidylprolylisomerase	5.2.1.8	Peptidylprolylisomerase			5.2.1.8	Peptidylprolylisomerase
ETH_00034825	3.1.13.4	Poly(A)-specificribonuclease	3.1.13.4	Poly(A)-specificribonuclease			3.1.13.4	Poly(A)-specificribonuclease
ETH_00019655	3.6.5.5	DynaminGTPase
ETH_00022040	1.5.99.8	Prolinedehydrogenase					1.5.99.8	Prolinedehydrogenase
ETH_00024370	1.8.1.8	Protein-disulfidereductase					1.8.1.8	Protein-disulfidereductase
ETH_00006290	2.7.7.6	DNA-directedRNApolymerase					2.7.7.6	DNA-directedRNApolymerase
ETH_00017660	5.3.1.8	Mannose-6-phosphateisomerase					5.3.1.8	Mannose-6-phosphateisomerase
ETH_00004005	2.7.11.1	Non-specificserine/threonineproteinkinase
ETH_00024275	2.7.11.1	Non-specificserine/threonineproteinkinase
ETH_00013925	2.7.4.3	Adenylatekinase	2.7.4.3	Adenylatekinase			2.7.4.3	Adenylatekinase
ETH_00029155	2.7.10.2	Non-specificprotein-tyrosinekinase
ETH_00000275	2.7.7.23	UDP-N-acetylglucosaminediphosphorylase					2.7.7.23	UDP-N-acetylglucosaminediphosphorylase
ETH_00013220	3.1.1.3	Triacylglycerollipase					3.1.1.3	Triacylglycerollipase
ETH_00037560	6.1.1.20	Phenylalanine--tRNAligase	6.1.1.20	Phenylalanine--tRNAligase			6.1.1.20	Phenylalanine--tRNAligase
ETH_00010180	1.6.5.3	NADH:ubiquinonereductase(H(+)-translocating)					1.6.5.3	NADH:ubiquinonereductase(H(+)-translocating)
ETH_00011990	2.7.11.1	Non-specificserine/threonineproteinkinase
ETH_00021400	3.1.3.48	Protein-tyrosine-phosphatase					3.1.3.48	Protein-tyrosine-phosphatase
ETH_00000210	3.6.1.3	Adenosinetriphosphatase					3.6.1.3	Adenosinetriphosphatase
ETH_00018170	2.1.1.48		2.1.1.48				2.1.1.48
ETH_00024665	2.7.11.1	Non-specificserine/threonineproteinkinase					2.7.11.1	Non-specificserine/threonineproteinkinase
ETH_00005090	4.6.1.1	Adenylatecyclase					4.6.1.1	Adenylatecyclase
ETH_00003515	5.99.1.3	DNAtopoisomerase(ATP-hydrolyzing)	5.99.1.3	DNAtopoisomerase(ATP-hydrolyzing)			5.99.1.3	DNAtopoisomerase(ATP-hydrolyzing)
ETH_00033095	2.7.1.68	1-phosphatidylinositol-4-phosphate5-kinase
ETH_00013240	2.7.1.68	1-phosphatidylinositol-4-phosphate5-kinase					2.7.1.68	1-phosphatidylinositol-4-phosphate5-kinase
ETH_00011310	2.7.1.68	1-phosphatidylinositol-4-phosphate5-kinase
ETH_00022890	2.7.11.1	Non-specificserine/threonineproteinkinase
ETH_00027445	2.1.1.43	Histone-lysineN-methyltransferase
ETH_00029690	2.7.7.19	Polynucleotideadenylyltransferase					2.7.7.7	DNA-directedDNApolymerase
ETH_00021920	3.5.1.98	Histonedeacetylase	3.5.1.98	Histonedeacetylase			3.5.1.98	Histonedeacetylase
ETH_00009380	2.7.7.6	DNA-directedRNApolymerase					2.7.7.6	DNA-directedRNApolymerase
ETH_00012040	2.7.1.68	1-phosphatidylinositol-4-phosphate5-kinase
ETH_00000320	5.2.1.8	Peptidylprolylisomerase	5.2.1.8	Peptidylprolylisomerase			5.2.1.8	Peptidylprolylisomerase
ETH_00002955	6.1.1.10	Methionine--tRNAligase	6.1.1.1	Tyrosine--tRNAligase
ETH_00042995	2.3.1.48	Histoneacetyltransferase
ETH_00006295	2.7.7.6	DNA-directedRNApolymerase					2.7.7.6	DNA-directedRNApolymerase
ETH_00026185	5.2.1.8	Peptidylprolylisomerase	5.2.1.8	Peptidylprolylisomerase
ETH_00036950	2.8.1.8	Lipoylsynthase					2.8.1.8	Lipoylsynthase
ETH_00035810	5.2.1.8	Peptidylprolylisomerase	5.2.1.8	Peptidylprolylisomerase			5.2.1.8	Peptidylprolylisomerase
ETH_00001865	1.14.99.29	Deoxyhypusinemonooxygenase					1.14.99.29	Deoxyhypusinemonooxygenase
ETH_00016035	2.7.7.2	FADsynthetase					2.7.7.2	FADsynthetase
ETH_00010650	2.7.11.1	Non-specificserine/threonineproteinkinase
ETH_00014275	3.4.13.20	Beta-Ala-Hisdipeptidase					3.4.13.20	Beta-Ala-Hisdipeptidase
ETH_00014535	3.1.13.4	Poly(A)-specificribonuclease	3.1.13.4	Poly(A)-specificribonuclease			3.1.13.4	Poly(A)-specificribonuclease
ETH_00042590	2.7.7.6	DNA-directedRNApolymerase					2.7.1.23	NAD(+)kinase
ETH_00025545	3.6.1.3	Adenosinetriphosphatase					3.6.1.3	Adenosinetriphosphatase
ETH_00030495	5.2.1.8	Peptidylprolylisomerase	5.2.1.8	Peptidylprolylisomerase			5.2.1.8	Peptidylprolylisomerase
ETH_00038220	3.5.1.98	Histonedeacetylase					3.5.1.98	Histonedeacetylase
ETH_00021415	2.7.11.1	Non-specificserine/threonineproteinkinase
ETH_00022035	2.7.11.1	Non-specificserine/threonineproteinkinase
ETH_00009420	2.7.11.1	Non-specificserine/threonineproteinkinase					4.1.1.70	Glutaconyl-CoAdecarboxylase
ETH_00001250	5.99.1.3	DNAtopoisomerase(ATP-hydrolyzing)	5.99.1.3	DNAtopoisomerase(ATP-hydrolyzing)			5.99.1.3	DNAtopoisomerase(ATP-hydrolyzing)
ETH_00011605	2.4.1.119	Dolichyl-diphosphooligosaccharide--proteinglycotransferase
ETH_00030810	2.7.11.1	Non-specificserine/threonineproteinkinase
ETH_00039810	4.1.1.65	Phosphatidylserinedecarboxylase	4.1.1.65	Phosphatidylserinedecarboxylase			4.1.1.65	Phosphatidylserinedecarboxylase
ETH_00019295	2.7.1.68	1-phosphatidylinositol-4-phosphate5-kinase
ETH_00026430	2.7.11.1	Non-specificserine/threonineproteinkinase
ETH_00022950	2.7.11.1	Non-specificserine/threonineproteinkinase
ETH_00033350	2.4.2.31	NAD(+)--protein-arginineADP-ribosyltransferase					2.4.2.31	NAD(+)--protein-arginineADP-ribosyltransferase
ETH_00031305	2.7.11.1	Non-specificserine/threonineproteinkinase					1.6.3.1	NAD(P)Hoxidase
ETH_00010625	3.6.1.3	Adenosinetriphosphatase					3.6.1.3	Adenosinetriphosphatase
ETH_00033545	3.4.11.2	Membranealanylaminopeptidase					3.4.11.2	Membranealanylaminopeptidase
ETH_00033190	5.2.1.8	Peptidylprolylisomerase					5.2.1.8	Peptidylprolylisomerase
ETH_00007760	2.7.11.1	Non-specificserine/threonineproteinkinase
ETH_00020950	2.1.1.43	Histone-lysineN-methyltransferase
ETH_00007870	2.7.11.1	Non-specificserine/threonineproteinkinase
ETH_00018260	2.3.1.48	Histoneacetyltransferase
ETH_00032030	5.2.1.8	Peptidylprolylisomerase	5.2.1.8	Peptidylprolylisomerase
ETH_00011870	2.7.7.6	DNA-directedRNApolymerase					2.7.7.6	DNA-directedRNApolymerase
ETH_00027305	3.1.3.16	Phosphoproteinphosphatase					3.1.3.16	Phosphoproteinphosphatase
ETH_00005385	3.1.3.2	Acidphosphatase					3.1.3.2	Acidphosphatase
ETH_00013650	3.1.3.5	5'-nucleotidase	3.1.3.5	5'-nucleotidase			3.1.3.5	5'-nucleotidase
ETH_00008760	2.7.11.1	Non-specificserine/threonineproteinkinase					1.6.3.1	NAD(P)Hoxidase
ETH_00038310	3.1.3.16	Phosphoproteinphosphatase					3.1.3.16	Phosphoproteinphosphatase
ETH_00014910	2.7.1.68	1-phosphatidylinositol-4-phosphate5-kinase					2.7.1.150	1-phosphatidylinositol-3-phosphate5-kinase
ETH_00019510	3.6.1.3	Adenosinetriphosphatase					3.6.1.3	Adenosinetriphosphatase
ETH_00023045	3.4.11.18	Methionylaminopeptidase
ETH_00030065	2.1.1.43	Histone-lysineN-methyltransferase
ETH_00001075	2.7.11.1	Non-specificserine/threonineproteinkinase
ETH_00029995	2.4.1.141	N-acetylglucosaminyldiphosphodolicholN-acetylglucosaminyltransferase					2.4.1.141	N-acetylglucosaminyldiphosphodolicholN-acetylglucosaminyltransferase
ETH_00013195	5.2.1.8	Peptidylprolylisomerase	5.2.1.8	Peptidylprolylisomerase			5.2.1.8	Peptidylprolylisomerase
ETH_00029580	2.7.11.1	Non-specificserine/threonineproteinkinase
ETH_00042945	5.2.1.8	Peptidylprolylisomerase	5.2.1.8	Peptidylprolylisomerase
ETH_00019235	2.7.11.18	[Myosinlight-chain]kinase
ETH_00030620	1.8.1.8	Protein-disulfidereductase					1.8.1.8	Protein-disulfidereductase
ETH_00013660	2.7.11.1	Non-specificserine/threonineproteinkinase					3.1.1.4	PhospholipaseA(2)
ETH_00015885	2.7.7.7	DNA-directedDNApolymerase					2.7.7.7	DNA-directedDNApolymerase
ETH_00015380	2.7.11.1	Non-specificserine/threonineproteinkinase					3.1.4.46	Glycerophosphodiesterphosphodiesterase
ETH_00020090	2.7.11.1	Non-specificserine/threonineproteinkinase
ETH_00034790	3.1.2.4	3-hydroxyisobutyryl-CoAhydrolase					3.1.2.4	3-hydroxyisobutyryl-CoAhydrolase
ETH_00030730	3.1.2.15
ETH_00033080	2.7.11.1	Non-specificserine/threonineproteinkinase
ETH_00000950	2.7.11.1	Non-specificserine/threonineproteinkinase
ETH_00035430	2.7.7.6	DNA-directedRNApolymerase					2.7.7.6	DNA-directedRNApolymerase
ETH_00036265	2.7.7.6	DNA-directedRNApolymerase					2.7.7.6	DNA-directedRNApolymerase
ETH_00000890	2.7.11.1	Non-specificserine/threonineproteinkinase
ETH_00005730	1.14.13.39	Nitric-oxidesynthase					1.14.13.39	Nitric-oxidesynthase
ETH_00007455	2.7.11.1	Non-specificserine/threonineproteinkinase
ETH_00011875	3.5.1.52	Peptide-N(4)-(N-acetyl-beta-glucosaminyl)asparagineamidase					5.3.4.1	Proteindisulfide-isomerase
ETH_00035825	2.3.1.48	Histoneacetyltransferase					2.3.1.48	Histoneacetyltransferase
ETH_00007230	2.4.1.119	Dolichyl-diphosphooligosaccharide--proteinglycotransferase					2.4.1.119	Dolichyl-diphosphooligosaccharide--proteinglycotransferase
ETH_00035330	2.7.7.6	DNA-directedRNApolymerase					2.7.7.6	DNA-directedRNApolymerase
ETH_00033130	3.1.13.5	RibonucleaseD					3.1.13.5	RibonucleaseD
ETH_00029150	2.7.11.1	Non-specificserine/threonineproteinkinase
ETH_00005585	3.1.3.16	Phosphoproteinphosphatase					3.1.3.16	Phosphoproteinphosphatase
ETH_00011710	2.7.11.1	Non-specificserine/threonineproteinkinase					3.1.3.16	Phosphoproteinphosphatase
ETH_00041980	3.1.3.16	Phosphoproteinphosphatase					3.1.3.16	Phosphoproteinphosphatase
ETH_00010095	2.7.11.1	Non-specificserine/threonineproteinkinase
ETH_00019725	3.1.3.2	Acidphosphatase					3.1.3.2	Acidphosphatase
ETH_00026255	4.1.1.23	Orotidine-5'-phosphatedecarboxylase	4.1.1.23	Orotidine-5'-phosphatedecarboxylase			2.4.2.10, 4.1.1.23	Orotatephosphoribosyltransferase, Orotidine-5'-phosphatedecarboxylase
ETH_00000070	2.3.1.48	Histoneacetyltransferase					2.3.1.48	Histoneacetyltransferase
ETH_00011255	3.1.1.1	Carboxylesterase					3.1.1.1	Carboxylesterase
ETH_00025305	2.3.1.48	Histoneacetyltransferase					3.1.1.47	1-alkyl-2-acetylglycerophosphocholineesterase
ETH_00030030	1.8.1.8	Protein-disulfidereductase					1.8.1.8	Protein-disulfidereductase
ETH_00006580	2.7.11.1	Non-specificserine/threonineproteinkinase
ETH_00009985	2.7.11.1	Non-specificserine/threonineproteinkinase
ETH_00021100	3.1.2.15						3.1.2.15
ETH_00036900	2.7.1.68	1-phosphatidylinositol-4-phosphate5-kinase
ETH_00041725	2.1.1.35	tRNA(uracil(54)-C(5))-methyltransferase	2.1.1.35	tRNA(uracil(54)-C(5))-methyltransferase			2.1.1.35	tRNA(uracil(54)-C(5))-methyltransferase
ETH_00010570	2.7.1.68	1-phosphatidylinositol-4-phosphate5-kinase
ETH_00004650	3.4.22.34	Legumain					3.4.22.34	Legumain
ETH_00009280	2.1.1.43	Histone-lysineN-methyltransferase
ETH_00017075	4.6.1.1	Adenylatecyclase					4.6.1.1	Adenylatecyclase
ETH_00031205	2.7.11.1	Non-specificserine/threonineproteinkinase
ETH_00032390	3.1.3.2	Acidphosphatase					3.1.3.2	Acidphosphatase
ETH_00002260	2.7.11.1	Non-specificserine/threonineproteinkinase
ETH_00008770	2.7.11.1	Non-specificserine/threonineproteinkinase
ETH_00024715	2.4.2.30	NAD(+)ADP-ribosyltransferase
ETH_00037585	2.1.1.43	Histone-lysineN-methyltransferase					3.1.1.47	1-alkyl-2-acetylglycerophosphocholineesterase
ETH_00001980	2.3.1.48	Histoneacetyltransferase
ETH_00021635	2.1.1.43	Histone-lysineN-methyltransferase
ETH_00029435	2.7.8.2	Diacylglycerolcholinephosphotransferase					2.7.8.1	Ethanolaminephosphotransferase
ETH_00027200	6.2.1.3	Long-chain-fatty-acid--CoAligase					6.2.1.3	Long-chain-fatty-acid--CoAligase
ETH_00031125	5.2.1.8	Peptidylprolylisomerase					5.2.1.8	Peptidylprolylisomerase
ETH_00004760	2.7.7.7	DNA-directedDNApolymerase					2.7.7.7	DNA-directedDNApolymerase
ETH_00016825	2.3.1.48	Histoneacetyltransferase
ETH_00012120	3.1.13.4	Poly(A)-specificribonuclease					3.1.13.1	ExoribonucleaseII
ETH_00039535			6.1.1.20	Phenylalanine--tRNAligase
ETH_00030160			3.4.19.3	Pyroglutamyl-peptidaseI			2.3.1.48	Histoneacetyltransferase
ETH_00030500			3.6.1.7	Acylphosphatase			3.6.1.7	Acylphosphatase
ETH_00022050			3.1.3.16	Phosphoproteinphosphatase
ETH_00033965			2.7.10.2	Non-specificprotein-tyrosinekinase
ETH_00038535			2.7.12.1	Dual-specificitykinase			2.7.11.22	Cyclin-dependentkinase
ETH_00004545			5.4.2.2	Phosphoglucomutase
ETH_00000025							4.1.1.70	Glutaconyl-CoAdecarboxylase
ETH_00000080							2.7.11.13, 2.7.11.17, 2.7.11.21	ProteinkinaseC, Calcium/calmodulin-dependentproteinkinase, Polokinase
ETH_00000090							2.1.1.29
ETH_00000110							2.7.10.2	Non-specificprotein-tyrosinekinase
ETH_00000130							3.4.21.101	Xanthomonalisin
ETH_00000160							2.3.1.88	Peptidealpha-N-acetyltransferase
ETH_00000165							3.1.13.5	RibonucleaseD
ETH_00000225							1.1.1.91	Aryl-alcoholdehydrogenase(NADP(+))
ETH_00000245							3.4.19.12	Ubiquitinylhydrolase1
ETH_00000395							3.4.21.62	Subtilisin
ETH_00000430							6.1.1.11	Serine--tRNAligase
ETH_00000515							2.4.1.198	PhosphatidylinositolN-acetylglucosaminyltransferase
ETH_00000520							6.2.1.4	Succinate--CoAligase(GDP-forming)
ETH_00000590							4.1.1.70	Glutaconyl-CoAdecarboxylase
ETH_00000680							4.1.1.70	Glutaconyl-CoAdecarboxylase
ETH_00000760							3.5.1.19	Nicotinamidase
ETH_00000925							2.7.7.8	Polyribonucleotidenucleotidyltransferase
ETH_00001135							3.1.2.15
ETH_00001155							1.8.1.8	Protein-disulfidereductase
ETH_00001290							3.1.2.15
ETH_00001440							6.3.3.2	5-formyltetrahydrofolatecyclo-ligase
ETH_00001580							3.4.17.1	CarboxypeptidaseA
ETH_00001590							3.4.14.1	Dipeptidyl-peptidaseI
ETH_00001600							3.4.14.1	Dipeptidyl-peptidaseI
ETH_00001710							2.1.1.36
ETH_00001750							3.1.4.12	Sphingomyelinphosphodiesterase
ETH_00001830							2.7.11.17	Calcium/calmodulin-dependentproteinkinase
ETH_00001895							3.4.21.66	Thermitase
ETH_00002025							2.7.1.160	2'-phosphotransferase
ETH_00002180							2.7.11.23	[RNA-polymerase]-subunitkinase
ETH_00002330							2.5.1.42	Geranylgeranylglycerol-phosphategeranylgeranyltransferase
ETH_00002435							1.14.13.20	2,4-dichlorophenol6-monooxygenase
ETH_00002575							5.3.4.1	Proteindisulfide-isomerase
ETH_00002635							2.4.1.119	Dolichyl-diphosphooligosaccharide--proteinglycotransferase
ETH_00002690							3.1.13.1	ExoribonucleaseII
ETH_00002850							3.1.-.-
ETH_00002875							3.1.-.-
ETH_00002900							4.1.1.70	Glutaconyl-CoAdecarboxylase
ETH_00002910							3.4.22.68	Ulp1peptidase
ETH_00002970							4.1.1.70	Glutaconyl-CoAdecarboxylase
ETH_00003090							2.7.4.21	Inositol-hexakisphosphatekinase
ETH_00003220							2.7.10.2	Non-specificprotein-tyrosinekinase
ETH_00003250							1.14.11.27	[HistoneH3]-lysine-36demethylase
ETH_00003265							3.4.21.84	LimulusclottingfactorC
ETH_00003270							3.4.21.84	LimulusclottingfactorC
ETH_00003530							2.7.11.23	[RNA-polymerase]-subunitkinase
ETH_00003620							3.1.13.1	ExoribonucleaseII
ETH_00003625							3.1.13.1	ExoribonucleaseII
ETH_00003760							3.1.4.46	Glycerophosphodiesterphosphodiesterase
ETH_00003780							4.1.1.70	Glutaconyl-CoAdecarboxylase
ETH_00003970							3.1.26.4	RibonucleaseH
ETH_00004175							4.1.1.70	Glutaconyl-CoAdecarboxylase
ETH_00004420							2.7.7.56	tRNAnucleotidyltransferase
ETH_00004480							3.4.16.2	LysosomalPro-Xaacarboxypeptidase
ETH_00004485							2.5.1.18	Glutathionetransferase
ETH_00004495							5.3.1.9	Glucose-6-phosphateisomerase
ETH_00004505							4.1.1.70	Glutaconyl-CoAdecarboxylase
ETH_00004605							4.1.1.70	Glutaconyl-CoAdecarboxylase
ETH_00004850							2.7.4.3	Adenylatekinase
ETH_00004855							2.7.4.3	Adenylatekinase
ETH_00004970							1.8.3.2	Thioloxidase
ETH_00004990							3.1.2.15
ETH_00005050							3.1.4.17	3',5'-cyclic-nucleotidephosphodiesterase
ETH_00005170							2.7.11.17	Calcium/calmodulin-dependentproteinkinase
ETH_00005320							3.6.4.3	Microtubule-severingATPase
ETH_00005325							6.1.1.20	Phenylalanine--tRNAligase
ETH_00005340							3.1.3.16	Phosphoproteinphosphatase
ETH_00005400							2.7.11.21	Polokinase
ETH_00005405							2.7.11.13, 2.7.11.17, 2.7.11.21	ProteinkinaseC, Calcium/calmodulin-dependentproteinkinase, Polokinase
ETH_00005425							2.7.11.1	Non-specificserine/threonineproteinkinase
ETH_00005605							2.7.4.3	Adenylatekinase
ETH_00005610							6.3.2.25	Tubulin--tyrosineligase
ETH_00005695							5.99.1.3	DNAtopoisomerase(ATP-hydrolyzing)
ETH_00005840							2.7.11.21	Polokinase
ETH_00005995							4.1.1.70	Glutaconyl-CoAdecarboxylase
ETH_00006030							2.7.11.1	Non-specificserine/threonineproteinkinase
ETH_00006040							2.7.11.1	Non-specificserine/threonineproteinkinase
ETH_00006350							2.1.1.17	PhosphatidylethanolamineN-methyltransferase
ETH_00006415							3.4.24.35	GelatinaseB
ETH_00006500							3.4.11.18	Methionylaminopeptidase
ETH_00006680							2.7.1.23	NAD(+)kinase
ETH_00006750							6.1.1.16	Cysteine--tRNAligase
ETH_00006900							3.4.22.68	Ulp1peptidase
ETH_00006975							3.1.4.46	Glycerophosphodiesterphosphodiesterase
ETH_00007055							2.3.1.48	Histoneacetyltransferase
ETH_00007130							3.1.26.4	RibonucleaseH
ETH_00007165							3.4.21.84	LimulusclottingfactorC
ETH_00007170							3.4.21.84	LimulusclottingfactorC
ETH_00007175							3.4.21.84	LimulusclottingfactorC
ETH_00007180							3.4.21.84	LimulusclottingfactorC
ETH_00007345							3.4.24.64	Mitochondrialprocessingpeptidase
ETH_00007425							2.5.1.8
ETH_00007495							4.1.1.70	Glutaconyl-CoAdecarboxylase
ETH_00007680							3.1.13.4	Poly(A)-specificribonuclease
ETH_00007710							3.1.3.18	Phosphoglycolatephosphatase
ETH_00007815							2.7.4.21	Inositol-hexakisphosphatekinase
ETH_00008185							1.2.1.3	Aldehydedehydrogenase(NAD(+))
ETH_00008205							1.12.7.2	Ferredoxinhydrogenase
ETH_00008475							6.1.1.26	Pyrrolysine--tRNA(Pyl)ligase
ETH_00008570							3.5.2.6	Beta-lactamase
ETH_00008585							3.1.4.12	Sphingomyelinphosphodiesterase
ETH_00008885							3.1.3.3	Phosphoserinephosphatase
ETH_00008895							3.5.2.6	Beta-lactamase
ETH_00008985							5.99.1.3	DNAtopoisomerase(ATP-hydrolyzing)
ETH_00009010							2.3.1.51	1-acylglycerol-3-phosphateO-acyltransferase
ETH_00009295							3.1.4.46	Glycerophosphodiesterphosphodiesterase
ETH_00009390							4.1.1.70	Glutaconyl-CoAdecarboxylase
ETH_00009455							3.6.3.9	Sodium/potassium-exchangingATPase
ETH_00009625							6.6.1.1	Magnesiumchelatase
ETH_00009750							3.1.4.17	3',5'-cyclic-nucleotidephosphodiesterase
ETH_00009930							4.1.1.70	Glutaconyl-CoAdecarboxylase
ETH_00010065							5.4.99.12	tRNApseudouridine(38-40)synthase
ETH_00010140							3.4.21.7	Plasmin
ETH_00010285							3.1.1.47	1-alkyl-2-acetylglycerophosphocholineesterase
ETH_00010485							3.1.26.4	RibonucleaseH
ETH_00011035							6.3.2.19	Ubiquitin--proteinligase
ETH_00011165							4.1.1.70	Glutaconyl-CoAdecarboxylase
ETH_00011230							2.1.1.34	tRNA(guanosine(18)-2'-O)-methyltransferase
ETH_00011240							6.3.2.19	Ubiquitin--proteinligase
ETH_00011270							2.7.7.48	RNA-directedRNApolymerase
ETH_00011460							1.9.3.1	Cytochrome-coxidase
ETH_00011500							2.4.1.18	1,4-alpha-glucanbranchingenzyme
ETH_00011600							3.6.1.15	Nucleoside-triphosphatase
ETH_00011760							3.4.14.1	Dipeptidyl-peptidaseI
ETH_00011840							3.1.1.23	Acylglycerollipase
ETH_00011895							3.1.4.17	3',5'-cyclic-nucleotidephosphodiesterase
ETH_00011955							3.6.1.15	Nucleoside-triphosphatase
ETH_00012100							2.7.7.6	DNA-directedRNApolymerase
ETH_00012215							3.4.21.108	HtrA2peptidase
ETH_00012240							2.7.7.6	DNA-directedRNApolymerase
ETH_00012290							3.6.1.29	Bis(5'-adenosyl)-triphosphatase
ETH_00012355							3.6.1.6	Nucleoside-diphosphatase
ETH_00012535							3.4.21.108	HtrA2peptidase
ETH_00012555							3.4.14.11	Xaa-Prodipeptidyl-peptidase
ETH_00012565							1.1.1.62	Estradiol17-beta-dehydrogenase
ETH_00012815							3.4.21.27	CoagulationfactorXIa
ETH_00012835							3.1.3.16	Phosphoproteinphosphatase
ETH_00012910							4.1.1.70	Glutaconyl-CoAdecarboxylase
ETH_00013355							2.7.4.21	Inositol-hexakisphosphatekinase
ETH_00013400							2.7.12.1	Dual-specificitykinase
ETH_00013540							3.1.26.4	RibonucleaseH
ETH_00013570							4.1.1.70	Glutaconyl-CoAdecarboxylase
ETH_00013620							3.1.4.45	N-acetylglucosamine-1-phosphodiesteralpha-N-acetylglucosaminidase
ETH_00013680							4.1.1.70	Glutaconyl-CoAdecarboxylase
ETH_00013740							3.2.1.91	Cellulose1,4-beta-cellobiosidase(non-reducingend)
ETH_00013895							2.5.1.16	Spermidinesynthase
ETH_00014075							6.3.2.17	Tetrahydrofolatesynthase
ETH_00014280							3.4.13.20	Beta-Ala-Hisdipeptidase
ETH_00014305							4.1.1.70	Glutaconyl-CoAdecarboxylase
ETH_00014540							4.1.1.70	Glutaconyl-CoAdecarboxylase
ETH_00014720							3.1.13.4	Poly(A)-specificribonuclease
ETH_00014760							2.3.2.6	Leucyltransferase
ETH_00014830							3.1.3.18	Phosphoglycolatephosphatase
ETH_00014860							3.1.13.1	ExoribonucleaseII
ETH_00014900							3.1.26.11	RibonucleaseZ
ETH_00014940							2.7.11.4	[3-methyl-2-oxobutanoatedehydrogenase(acetyl-transferring)]kinase
ETH_00015060							4.1.1.70	Glutaconyl-CoAdecarboxylase
ETH_00015090							2.7.7.7	DNA-directedDNApolymerase
ETH_00015100							2.5.1.16	Spermidinesynthase
ETH_00015105							4.2.1.79	2-methylcitratedehydratase
ETH_00015180							6.3.2.19	Ubiquitin--proteinligase
ETH_00015245							3.4.21.108	HtrA2peptidase
ETH_00015430							3.1.4.12	Sphingomyelinphosphodiesterase
ETH_00015440							3.4.21.22	CoagulationfactorIXa
ETH_00015460							3.4.24.35	GelatinaseB
ETH_00015615							2.8.1.7	Cysteinedesulfurase
ETH_00015620							3.4.21.7	Plasmin
ETH_00015750							6.3.2.5	Phosphopantothenate--cysteineligase
ETH_00015800							2.5.1.60	ProteingeranylgeranyltransferasetypeII
ETH_00015825							2.1.1.29
ETH_00015960							4.1.1.70	Glutaconyl-CoAdecarboxylase
ETH_00016115							2.7.11.1	Non-specificserine/threonineproteinkinase
ETH_00016395							5.3.4.1	Proteindisulfide-isomerase
ETH_00016505							2.7.11.11	cAMP-dependentproteinkinase
ETH_00016525							2.7.11.1	Non-specificserine/threonineproteinkinase
ETH_00016725							3.1.3.12	Trehalose-phosphatase
ETH_00016770							5.99.1.3	DNAtopoisomerase(ATP-hydrolyzing)
ETH_00016910							2.7.10.2	Non-specificprotein-tyrosinekinase
ETH_00016990							2.7.4.6	Nucleoside-diphosphatekinase
ETH_00017130							2.7.7.27	Glucose-1-phosphateadenylyltransferase
ETH_00017135							2.7.7.3	Pantetheine-phosphateadenylyltransferase
ETH_00017155							3.1.4.12	Sphingomyelinphosphodiesterase
ETH_00017405							2.7.1.150	1-phosphatidylinositol-3-phosphate5-kinase
ETH_00017415							3.1.3.16	Phosphoproteinphosphatase
ETH_00017485							3.4.11.2	Membranealanylaminopeptidase
ETH_00017565							2.1.1.43	Histone-lysineN-methyltransferase
ETH_00017620							1.8.3.2	Thioloxidase
ETH_00017745							4.1.1.70	Glutaconyl-CoAdecarboxylase
ETH_00017895							2.4.1.175	acetylgalactosaminyltransferase
ETH_00018155							3.4.24.56	Insulysin
ETH_00018405							3.1.1.47	1-alkyl-2-acetylglycerophosphocholineesterase
ETH_00018435							3.6.4.3	Microtubule-severingATPase
ETH_00018480							3.6.1.3	Adenosinetriphosphatase
ETH_00018795							2.3.1.168	Dihydrolipoyllysine-residue(2-methylpropanoyl)transferase
ETH_00018825							5.99.1.3	DNAtopoisomerase(ATP-hydrolyzing)
ETH_00019095							4.1.1.70	Glutaconyl-CoAdecarboxylase
ETH_00019390							2.4.2.30	NAD(+)ADP-ribosyltransferase
ETH_00019470							2.7.7.6	DNA-directedRNApolymerase
ETH_00019730							3.1.3.2	Acidphosphatase
ETH_00019755							3.4.14.1	Dipeptidyl-peptidaseI
ETH_00019800							3.4.21.84	LimulusclottingfactorC
ETH_00019810							3.4.21.84	LimulusclottingfactorC
ETH_00019815							3.4.21.84	LimulusclottingfactorC
ETH_00020065							3.4.21.53	EndopeptidaseLa
ETH_00020105							4.1.1.70	Glutaconyl-CoAdecarboxylase
ETH_00020285							3.1.4.17	3',5'-cyclic-nucleotidephosphodiesterase
ETH_00020535							3.6.3.14	H(+)-transportingtwo-sectorATPase
ETH_00020590							2.7.11.13, 2.7.11.17, 2.7.11.21	ProteinkinaseC, Calcium/calmodulin-dependentproteinkinase, Polokinase
ETH_00020610							2.7.11.21	Polokinase
ETH_00020615							2.7.11.21	Polokinase
ETH_00020620							2.7.11.23	[RNA-polymerase]-subunitkinase
ETH_00020640							4.1.1.70	Glutaconyl-CoAdecarboxylase
ETH_00020875							2.4.1.21	Starchsynthase
ETH_00020885							2.7.11.17	Calcium/calmodulin-dependentproteinkinase
ETH_00020945							2.4.1.119	Dolichyl-diphosphooligosaccharide--proteinglycotransferase
ETH_00021125							2.7.1.71	Shikimatekinase
ETH_00021130							2.7.1.71	Shikimatekinase
ETH_00021150							2.7.1.150	1-phosphatidylinositol-3-phosphate5-kinase
ETH_00021195							2.7.11.25	Mitogen-activatedproteinkinasekinasekinase
ETH_00021200							4.1.1.70	Glutaconyl-CoAdecarboxylase
ETH_00021325							2.7.7.8	Polyribonucleotidenucleotidyltransferase
ETH_00021345							3.4.21.22, 3.4.21.6	CoagulationfactorIXa, CoagulationfactorXa
ETH_00021420							3.4.21.53	EndopeptidaseLa
ETH_00021480							2.7.7.7	DNA-directedDNApolymerase
ETH_00021655							3.4.21.27	CoagulationfactorXIa
ETH_00021670							3.1.3.67	Phosphatidylinositol-3,4,5-trisphosphate3-phosphatase
ETH_00021760							4.1.1.70	Glutaconyl-CoAdecarboxylase
ETH_00021810							5.3.4.1	Proteindisulfide-isomerase
ETH_00021865							3.6.3.43	Peptide-transportingATPase
ETH_00022010							5.99.1.2	DNAtopoisomerase
ETH_00022065							4.2.99.18	DNA-(apurinicorapyrimidinicsite)lyase
ETH_00022120							3.4.21.66	Thermitase
ETH_00022125							2.4.2.31	NAD(+)--protein-arginineADP-ribosyltransferase
ETH_00022210							2.5.1.18	Glutathionetransferase
ETH_00022540							4.1.1.70	Glutaconyl-CoAdecarboxylase
ETH_00022625							4.1.1.70	Glutaconyl-CoAdecarboxylase
ETH_00022795							6.1.1.12	Aspartate--tRNAligase
ETH_00022815							2.3.1.24	SphingosineN-acyltransferase
ETH_00022820							2.7.11.1	Non-specificserine/threonineproteinkinase
ETH_00023205							2.7.11.1	Non-specificserine/threonineproteinkinase
ETH_00023385							3.6.3.14	H(+)-transportingtwo-sectorATPase
ETH_00023590							3.4.21.7	Plasmin
ETH_00023595							3.4.21.7	Plasmin
ETH_00023600							3.4.21.7	Plasmin
ETH_00023605							3.4.21.7	Plasmin
ETH_00023610							3.4.21.7	Plasmin
ETH_00023615							3.4.21.7	Plasmin
ETH_00023620							3.4.21.7	Plasmin
ETH_00023625							3.4.21.7	Plasmin
ETH_00023635							3.4.21.7	Plasmin
ETH_00023715							2.3.1.48	Histoneacetyltransferase
ETH_00023770							2.7.1.160	2'-phosphotransferase
ETH_00023885							2.7.11.1	Non-specificserine/threonineproteinkinase
ETH_00023895							2.4.1.119	Dolichyl-diphosphooligosaccharide--proteinglycotransferase
ETH_00023930							4.1.1.70	Glutaconyl-CoAdecarboxylase
ETH_00024050							3.1.1.23	Acylglycerollipase
ETH_00024085							3.4.21.22, 3.4.21.6	CoagulationfactorIXa, CoagulationfactorXa
ETH_00024195							2.7.7.6	DNA-directedRNApolymerase
ETH_00024350							2.7.11.17	Calcium/calmodulin-dependentproteinkinase
ETH_00024450							1.12.7.2	Ferredoxinhydrogenase
ETH_00024695							3.1.3.16	Phosphoproteinphosphatase
ETH_00024720							5.99.1.3	DNAtopoisomerase(ATP-hydrolyzing)
ETH_00024805							2.3.1.48	Histoneacetyltransferase
ETH_00024810							4.1.1.70	Glutaconyl-CoAdecarboxylase
ETH_00024825							3.6.3.14	H(+)-transportingtwo-sectorATPase
ETH_00024850							1.4.3.4	Monoamineoxidase
ETH_00024870							2.3.1.48	Histoneacetyltransferase
ETH_00024920							2.4.1.175	acetylgalactosaminyltransferase
ETH_00025100							3.1.13.-
ETH_00025160							3.4.21.7	Plasmin
ETH_00025370							3.1.13.-
ETH_00025605							3.1.26.4	RibonucleaseH
ETH_00025670							3.4.21.101	Xanthomonalisin
ETH_00025685							2.3.1.24	SphingosineN-acyltransferase
ETH_00025975							2.1.1.31
ETH_00026015							2.7.7.8	Polyribonucleotidenucleotidyltransferase
ETH_00026205							3.4.21.27	CoagulationfactorXIa
ETH_00026230							2.3.1.48	Histoneacetyltransferase
ETH_00026315							2.8.1.7	Cysteinedesulfurase
ETH_00026345							6.6.1.2	Cobaltochelatase
ETH_00026350							1.1.1.91	Aryl-alcoholdehydrogenase(NADP(+))
ETH_00026365							3.4.23.45	Memapsin1
ETH_00026425							2.7.4.21	Inositol-hexakisphosphatekinase
ETH_00026470							3.4.21.101	Xanthomonalisin
ETH_00026625							3.4.24.14	ProcollagenN-endopeptidase
ETH_00026630							3.1.2.15
ETH_00026770							6.3.2.19	Ubiquitin--proteinligase
ETH_00026775							2.7.7.6	DNA-directedRNApolymerase
ETH_00026780							4.1.1.48	Indole-3-glycerol-phosphatesynthase
ETH_00026795							2.7.1.20	Adenosinekinase
ETH_00026815							3.4.17.1	CarboxypeptidaseA
ETH_00026955							4.1.1.70	Glutaconyl-CoAdecarboxylase
ETH_00026970							3.4.24.35	GelatinaseB
ETH_00027015							2.1.1.52
ETH_00027170							3.1.1.3	Triacylglycerollipase
ETH_00027440							6.1.1.2	Tryptophan--tRNAligase
ETH_00027460							3.4.21.27	CoagulationfactorXIa
ETH_00027505							3.1.3.24	Sucrose-phosphatephosphatase
ETH_00027615							3.1.4.17	3',5'-cyclic-nucleotidephosphodiesterase
ETH_00027645							3.1.3.18	Phosphoglycolatephosphatase
ETH_00027810							1.1.1.95	Phosphoglyceratedehydrogenase
ETH_00027955							4.2.1.1	Carbonatedehydratase
ETH_00027970							1.1.1.18	Inositol2-dehydrogenase
ETH_00028220							3.4.24.14	ProcollagenN-endopeptidase
ETH_00028250							1.11.1.8	Iodideperoxidase
ETH_00028345							1.9.3.1	Cytochrome-coxidase
ETH_00028355							3.4.21.108	HtrA2peptidase
ETH_00028530							2.8.1.8	Lipoylsynthase
ETH_00028770							3.1.1.47	1-alkyl-2-acetylglycerophosphocholineesterase
ETH_00029085							2.7.11.12	cGMP-dependentproteinkinase
ETH_00029130							2.1.1.31
ETH_00029320							3.6.3.14	H(+)-transportingtwo-sectorATPase
ETH_00029605							3.4.24.35	GelatinaseB
ETH_00029780							3.6.3.25	Sulfate-transportingATPase
ETH_00029910							4.1.1.65	Phosphatidylserinedecarboxylase
ETH_00029950							3.4.21.22, 3.4.21.6	CoagulationfactorIXa, CoagulationfactorXa
ETH_00030025							6.5.1.4	RNA-3'-phosphatecyclase
ETH_00030150							5.99.1.3	DNAtopoisomerase(ATP-hydrolyzing)
ETH_00030385							2.7.11.1	Non-specificserine/threonineproteinkinase
ETH_00030460							4.1.1.70	Glutaconyl-CoAdecarboxylase
ETH_00030580							4.1.1.70	Glutaconyl-CoAdecarboxylase
ETH_00030785							4.2.99.18	DNA-(apurinicorapyrimidinicsite)lyase
ETH_00030915							2.1.1.31
ETH_00031040							4.1.1.70	Glutaconyl-CoAdecarboxylase
ETH_00031135							2.7.7.8	Polyribonucleotidenucleotidyltransferase
ETH_00031410							1.1.99.1	Cholinedehydrogenase
ETH_00031440							2.1.1.66	rRNA(adenosine-2'-O)-methyltransferase
ETH_00031705							3.4.21.89	SignalpeptidaseI
ETH_00031770							4.1.1.70	Glutaconyl-CoAdecarboxylase
ETH_00031825							3.4.21.7	Plasmin
ETH_00031830							3.4.21.7	Plasmin
ETH_00031845							3.4.21.7	Plasmin
ETH_00031915							2.7.11.17	Calcium/calmodulin-dependentproteinkinase
ETH_00032060							3.4.21.7	Plasmin
ETH_00032080							3.1.26.5	RibonucleaseP
ETH_00032125							3.2.1.14	Chitinase
ETH_00032295							1.5.1.28	Opinedehydrogenase
ETH_00032355							3.1.-.-
ETH_00032480							4.1.1.70	Glutaconyl-CoAdecarboxylase
ETH_00032775							3.1.1.29	Aminoacyl-tRNAhydrolase
ETH_00032880							4.1.1.70	Glutaconyl-CoAdecarboxylase
ETH_00033030							2.7.7.8	Polyribonucleotidenucleotidyltransferase
ETH_00033055							3.4.21.84	LimulusclottingfactorC
ETH_00033070							4.3.3.2	Strictosidinesynthase
ETH_00033105							2.7.7.7	DNA-directedDNApolymerase
ETH_00033165							2.7.7.6	DNA-directedRNApolymerase
ETH_00033360							4.1.2.10	(R)-mandelonitrilelyase
ETH_00033575							3.1.3.36	Phosphoinositide5-phosphatase
ETH_00033600							3.1.26.4	RibonucleaseH
ETH_00033605							3.6.3.8	Calcium-transportingATPase
ETH_00033685							3.5.2.6	Beta-lactamase
ETH_00033705							4.1.1.70	Glutaconyl-CoAdecarboxylase
ETH_00033810							3.6.1.3	Adenosinetriphosphatase
ETH_00033860							4.1.1.70	Glutaconyl-CoAdecarboxylase
ETH_00033870							3.4.21.53	EndopeptidaseLa
ETH_00033895							5.3.4.1	Proteindisulfide-isomerase
ETH_00033925							4.1.1.70, 6.4.1.1	Glutaconyl-CoAdecarboxylase, Pyruvatecarboxylase
ETH_00034130							3.1.26.4	RibonucleaseH
ETH_00034240							4.2.3.12	6-pyruvoyltetrahydropterinsynthase
ETH_00034245							3.1.3.12	Trehalose-phosphatase
ETH_00034255							3.1.1.3	Triacylglycerollipase
ETH_00034320							3.6.4.3	Microtubule-severingATPase
ETH_00034355							3.1.26.4	RibonucleaseH
ETH_00034390							5.3.2.1	Phenylpyruvatetautomerase
ETH_00034420							5.3.4.1	Proteindisulfide-isomerase
ETH_00035225							3.4.25.1	Proteasomeendopeptidasecomplex
ETH_00035290							5.99.1.3	DNAtopoisomerase(ATP-hydrolyzing)
ETH_00035325							3.1.26.4	RibonucleaseH
ETH_00035340							3.1.1.47	1-alkyl-2-acetylglycerophosphocholineesterase
ETH_00035600							2.3.1.23	1-acylglycerophosphocholineO-acyltransferase
ETH_00035660							3.6.1.3	Adenosinetriphosphatase
ETH_00035695							3.6.3.24	Nickel-transportingATPase
ETH_00035740							5.99.1.3	DNAtopoisomerase(ATP-hydrolyzing)
ETH_00035745							3.4.21.7	Plasmin
ETH_00035800							3.4.24.59	Mitochondrialintermediatepeptidase
ETH_00035850							3.1.3.16	Phosphoproteinphosphatase
ETH_00035895							3.4.24.35	GelatinaseB
ETH_00035925							3.1.3.16	Phosphoproteinphosphatase
ETH_00036235							3.6.3.8	Calcium-transportingATPase
ETH_00036260							3.6.3.27	Phosphate-transportingATPase
ETH_00036270							2.7.11.25	Mitogen-activatedproteinkinasekinasekinase
ETH_00036280							2.3.1.48	Histoneacetyltransferase
ETH_00036330							2.7.11.25	Mitogen-activatedproteinkinasekinasekinase
ETH_00036360							2.3.1.48	Histoneacetyltransferase
ETH_00036385							4.1.1.70	Glutaconyl-CoAdecarboxylase
ETH_00036625							2.1.1.31
ETH_00036640							3.5.2.6	Beta-lactamase
ETH_00036665							3.4.21.89	SignalpeptidaseI
ETH_00036910							4.1.1.70	Glutaconyl-CoAdecarboxylase
ETH_00036920							2.7.7.7	DNA-directedDNApolymerase
ETH_00036945							3.1.1.4	PhospholipaseA(2)
ETH_00037075							2.7.11.25	Mitogen-activatedproteinkinasekinasekinase
ETH_00037145							2.5.1.18	Glutathionetransferase
ETH_00037315							2.4.1.173	Sterol3-beta-glucosyltransferase
ETH_00037325							2.4.1.119	Dolichyl-diphosphooligosaccharide--proteinglycotransferase
ETH_00037440							3.5.2.6	Beta-lactamase
ETH_00037475							2.4.1.34	1,3-beta-glucansynthase
ETH_00037480							3.1.1.47	1-alkyl-2-acetylglycerophosphocholineesterase
ETH_00037710							3.1.13.4	Poly(A)-specificribonuclease
ETH_00037970							2.7.11.7	[Myosinheavy-chain]kinase
ETH_00038380							1.14.11.27	[HistoneH3]-lysine-36demethylase
ETH_00038400							2.7.1.82	Ethanolaminekinase
ETH_00038420							4.1.1.70	Glutaconyl-CoAdecarboxylase
ETH_00038545							3.1.3.16	Phosphoproteinphosphatase
ETH_00038560							2.1.2.10	Aminomethyltransferase
ETH_00038625							3.6.3.9	Sodium/potassium-exchangingATPase
ETH_00038655							1.18.1.3, 1.6.5.4	Ferredoxin--NAD(+)reductase, Monodehydroascorbatereductase(NADH)
ETH_00038665							2.7.11.25	Mitogen-activatedproteinkinasekinasekinase
ETH_00038690							3.4.21.7	Plasmin
ETH_00038705							4.1.1.70	Glutaconyl-CoAdecarboxylase
ETH_00038785							3.6.4.3	Microtubule-severingATPase
ETH_00038870							4.1.1.70	Glutaconyl-CoAdecarboxylase
ETH_00039005							2.3.1.48	Histoneacetyltransferase
ETH_00039030							4.1.1.70	Glutaconyl-CoAdecarboxylase
ETH_00039165							2.7.11.23	[RNA-polymerase]-subunitkinase
ETH_00039185							2.7.11.17	Calcium/calmodulin-dependentproteinkinase
ETH_00039195							3.4.21.101	Xanthomonalisin
ETH_00039220							2.7.1.150	1-phosphatidylinositol-3-phosphate5-kinase
ETH_00039610							3.4.24.59	Mitochondrialintermediatepeptidase
ETH_00039780							2.3.1.48	Histoneacetyltransferase
ETH_00039820							3.6.1.15	Nucleoside-triphosphatase
ETH_00039870							1.2.4.2	Oxoglutaratedehydrogenase(succinyl-transferring)
ETH_00039880							5.1.3.1	Ribulose-phosphate3-epimerase
ETH_00040040							2.7.11.23	[RNA-polymerase]-subunitkinase
ETH_00040115							2.7.7.7	DNA-directedDNApolymerase
ETH_00040130							2.4.1.25	4-alpha-glucanotransferase
ETH_00040220							2.3.1.48	Histoneacetyltransferase
ETH_00040255							3.1.13.4	Poly(A)-specificribonuclease
ETH_00040460							3.1.26.4	RibonucleaseH
ETH_00040630							3.2.1.91	Cellulose1,4-beta-cellobiosidase(non-reducingend)
ETH_00040655							2.7.7.49	RNA-directedDNApolymerase
ETH_00040780							2.7.4.21	Inositol-hexakisphosphatekinase
ETH_00040850							2.1.1.31
ETH_00040960							5.3.1.23	S-methyl-5-thioribose-1-phosphateisomerase
ETH_00041085							2.4.2.29	tRNA-guaninetransglycosylase
ETH_00041190							2.4.2.31	NAD(+)--protein-arginineADP-ribosyltransferase
ETH_00041240							4.1.1.70	Glutaconyl-CoAdecarboxylase
ETH_00041415							2.7.7.8	Polyribonucleotidenucleotidyltransferase
ETH_00041560							3.6.3.24	Nickel-transportingATPase
ETH_00041790							2.4.1.18	1,4-alpha-glucanbranchingenzyme
ETH_00041805							4.1.1.65	Phosphatidylserinedecarboxylase
ETH_00041850							2.1.1.35	tRNA(uracil(54)-C(5))-methyltransferase
ETH_00041870							2.4.2.31	NAD(+)--protein-arginineADP-ribosyltransferase
ETH_00041965							2.7.11.1	Non-specificserine/threonineproteinkinase
ETH_00041975							2.4.1.21	Starchsynthase
ETH_00042010							2.7.11.1	Non-specificserine/threonineproteinkinase
ETH_00042050							3.1.4.12	Sphingomyelinphosphodiesterase
ETH_00042070							3.4.24.56	Insulysin
ETH_00042235							3.1.3.16	Phosphoproteinphosphatase
ETH_00042315							3.4.21.22	CoagulationfactorIXa
ETH_00042415							2.7.1.150	1-phosphatidylinositol-3-phosphate5-kinase
ETH_00042450							2.7.11.1	Non-specificserine/threonineproteinkinase
ETH_00042675							3.4.21.62	Subtilisin
ETH_00042680							2.7.11.17	Calcium/calmodulin-dependentproteinkinase
ETH_00042705							2.7.7.13, 2.7.7.27	Mannose-1-phosphateguanylyltransferase, Glucose-1-phosphateadenylyltransferase
ETH_00042715							2.7.11.25	Mitogen-activatedproteinkinasekinasekinase
ETH_00042740							2.7.11.25	Mitogen-activatedproteinkinasekinasekinase
ETH_00042870							5.3.4.1	Proteindisulfide-isomerase
ETH_00042905							3.1.3.16	Phosphoproteinphosphatase
ETH_00043000							2.7.7.7	DNA-directedDNApolymerase
ETH_00043230							3.1.3.16	Phosphoproteinphosphatase
ETH_00043295							4.1.1.70	Glutaconyl-CoAdecarboxylase
ETH_00043390							3.1.1.3	Triacylglycerollipase
ETH_00043495							2.7.11.25	Mitogen-activatedproteinkinasekinasekinase
ETH_00043650							1.1.1.91	Aryl-alcoholdehydrogenase(NADP(+))
ETH_00043670							3.5.2.6	Beta-lactamase
ETH_00043700							2.7.7.7	DNA-directedDNApolymerase
ETH_00043815							4.1.1.70	Glutaconyl-CoAdecarboxylase
ETH_00043875							2.7.4.21	Inositol-hexakisphosphatekinase
