# Supplementary material for: Genomic analysis of the causative agents of coccidiosis in domestic chickens
Source: HighWire-hosted journal article supplement (doi:10.1101/gr.168955.113), 2014-07-11
Supplement: Supplemental_Figures_Tables.docx [file Supplemental_Figures_Tables.docx]

Genomic analysis of the causative agents of coccidiosis in domestic chickens

Supplemental Tables and Figures

Adam J Reid1*, Damer P Blake2,3, Hifzur R Ansari4, Karen Billington3, Hilary P Browne1, Josephine Bryant1, Matt Dunn1, Stacy S Hung5, Fumiya Kawahara6, Diego Miranda-Saavedra7, Tareq B Malas4, Tobias Mourier8, Hardeep Naghra1,9, Mridul Nair4, Thomas D Otto1, Neil D Rawlings10, Pierre Rivailler3,11, Alejandro Sanchez-Flores12, Mandy Sanders1, Chandra Subramaniam3, Yea-Ling Tay13,14, Yong Woo4, Xikun Wu3,15, Bart Barrell1¥¨, Paul H Dear16, Christian Doerig17, Arthur Gruber18, Alasdair C Ivens19, John Parkinson5, Marie-Adèle Rajandream1†, Martin W Shirley20, Kiew-Lian Wan13,14, Matthew Berriman1, Fiona M Tomley2,3*, Arnab Pain4*

Supplemental Tables 3

Supplemental Table S1. Genome assembly statistics for tier 1 and tier 2 *Eimeria* genomes in comparison to the key apicomplexan species *Toxoplasma gondii* and *Plasmodium falciparum*. 3

Supplemental Table S2. Genome assembly stats for tier 3 genomes. 5

Supplemental Table S3. Assignment of optical map scaffolds to chromosomes. 6

Supplemental Table S4. Gene Ontology terms associated with *E. tenella* genes containing Homopolyermic Amino Acid Repeats (HAARs) and those without HAARs. 7

Supplemental Table S5. Putative structural context of 65 Homopolymeric Amino Acid Repeats (HAARS). 9

Supplemental Table S6. Novel gene families of the *Eimeria* genus. 13

Supplemental Table S7. Kinases of Eimeria and related species. 14

Supplemental Table S8. Distribution of LTR retrotransposon copy number across species. 15

Supplemental Table S9. The gene targets and gene-specific primers used in the single parasite RT-PCR screen of SAG transcription. 16

Supplemental Figures 18

Supplemental Figure S1. Density of small tandem repeats across *Eimeria* genomes. 18

Supplemental Figure S2. Structural context of HAARs in homology models. 19

Supplemental Figure S3. *K*a/*K*s ratios for sag, *esf1* and *esf2* gene families. 21

Supplemental Figure S4. Heatmap showing the conservation of individual metabolic pathways for *E. tenella*, *T. gondii*, and *N. caninum*. 22

Supplemental Figure S5. Distribution of the Api-AP2 family of DNA-binding domains and genes across the Apicomplexa. 23

Supplemental Figure S6. Clustering of ApiAP2 domain-containing genes across the Apicomplexa. 25

Supplemental Figure S7. Neighbour-joining phylogeny of Ty3/Gypsy LTR retrotransposon reverse transcriptases. 26

Supplemental Figure S8. Domain structures of chromovirus consensuses. 27

Supplemental Figure S9. Expression pattern for an example LTR retrotransposon from *E. tenella*. 28

Supplemental Datasets 30

Supplemental Dataset S1. Details of gene families of interest. 30

Supplemental Dataset S2. *K*a/*K*s ratios 30

Supplemental Dataset S3. Metabolic annotation for *E. tenella* genes 30

References 31

#

# Supplemental Tables

## Supplemental Table S1. Genome assembly statistics for tier 1 and tier 2 *Eimeria* genomes in comparison to the key apicomplexan species *Toxoplasma gondii* and *Plasmodium falciparum*.

Completeness of the genomes is shown both as a percentage of core eukaryotic genes ([using CEGMA; Parra et al. 2007](#_ENREF_3)) and this same percentage but relative to the well-sequenced coccidian *Toxoplasma gondii* to highlight the common lack of some of these genes in this group. There is a more complete genome sequence for *P. falciparum* but it has an even more reduced genome.† Figure taken from Reid et al. ([2012](#_ENREF_6)).

|  | ***Eimeria tenella* Houghton** | ***E. necatrix* Houghton** | ***E. acervulina* Houghton** | ***E. maxima* Weybridge** | ***Toxoplasma gondii* Me49** | ***Plasmodium falciparum* 3D7** |
| --- | --- | --- | --- | --- | --- | --- |
| **Genome assembly size (Mb)** | 51.8 | 55.2 | 46.1 | 46.2 | 63.0 | 23.3 |
| **Scaffolds** | 4664 | 3707 | 3415 | 3564 | 322 | 14 |
| **N50 (kb)** | 204 | 40 | 33 | 27 | 6401 | 1688 |
| **Chromosomes** | 14 | 14 | 14 | 14 | 14 | 14 |
| **Protein coding genes** | 8603 | 8627 | 6867 | 6057 | 7286 † | 5383 |
| **CEGMA completeness (%)** | 83.1 | 80.6 | 83.5 | 79.0 | 84.7 | 75.8 |
| **Completeness relative to *T. gondii* (%)** | 98.1 | 95.2 | 98.6 | 93.3 | 100 | - |
| **G+C content (%)** | 57.7 | 58.9 | 56.0 | 54.0 | 52.3 | 19.4 |
| **Mean gene length (bp)** | 1569 | 1653 | 2011 | 1997 | 2341 | 2292 |
| **Gene density (genes per kb)** | 0.165 | 0.156 | 0.148 | 0.131 | 0.121 | 0.231 |
| **Percent of genome encoding proteins** | 25.9 | 25.8 | 29.9 | 26.1 | 28.3 | 53.0 |
| **Map size (Mb)** | 51.5 | 60.6 | 49.8 | 47.4 | - | - |
| **No. optical contigs** | 15 | 16 | 15 | 15 | - | - |
| **Mb (%) sequence assembly aligned to optical map** | 23.9 (46) | 20.8 (37.6) | 14.2 (30.7) | 15.7 (34.0) | - | - |

## Supplemental Table S2. Genome assembly stats for tier 3 genomes.

|  | ***Eimeria brunetti* Houghton** | ***E. mitis* Houghton** | ***E. praecox* Houghton** |
| --- | --- | --- | --- |
| **Genome assembly size (Mb)** | 65.6 | 69.5 | 56.7 |
| **Scaffolds (>500bp)** | 5317 | 15978 | 12929 |
| **N50 (kb)** | 34 | 9 | 9 |
| **Protein coding genes** | 8711 | 10077 | 7635 |

## Supplemental Table S3. Assignment of optical map scaffolds to chromosomes.

Where possible we used known markers and pre-existing sequence data to assign our optical scaffolds to previously described chromosomes. The markers described were previously described in ([Lim et al. 2012](#_ENREF_2)).

| **Optical map scaffold** | **Size (Mbp)** | **Chr, assignment** | **Evidence** |
| --- | --- | --- | --- |
| **1** | 0.958 | 1 | Ling et al. (2007) |
| **2** | 1.017 | 2 | Lim et al. ([2012](#_ENREF_2)) |
| **3** | 1.627 | 3 | Etmic3 (chr3) |
| **4** | 1.846 | - | - |
| **5** | 2.679 | 5 | Etmic4 (chr 5) |
| **6** | 3.090 | - | - |
| **7** | 3.338 | 6/7 | Sag15-17 (chr6/7) |
| **8** | 3.683 | - | - |
| **9** | 3.823 | 9 | Etmic5 (chr 9), sag5 (chr 9/10), sag7 (chr 9/10) |
| **10** | 3.808 | - | - |
| **11** | 4.118 | - | - |
| **12** | 4.298 | 11 | Sag1-2 (chr 11) |
| **13** | 4.950 | 13 | Etmic1 (chr 13) |
| **14** | 5.595 | 4 | Sag20 (chr 4) |
| **15** | 6.631 | - | - |

## Supplemental Table S4. Gene Ontology terms associated with *E. tenella* genes containing Homopolyermic Amino Acid Repeats (HAARs) and those without HAARs.

Those genes from *E. tenella* containing HAARs and those which did not contain HAARs were subjected to a Gene Ontology enrichment analysis using GO::TermFinder ([Boyle et al. 2004](#_ENREF_1)). The P value was adjusted for multiple hypothesis testing and a cutoff of 0.001 was used.

| **Ontology** | **Term Id** | **Name** | **P value** |
| --- | --- | --- | --- |
|  | *Genes without repeats* | |  |
| Biological Process | GO:0006412 | Translation | 1.72E-8 |
|  | GO:0006333 | chromatin assembly or disassembly | 1.44E-5 |
|  | GO:0010467 | gene expression | 2.15E-5 |
|  | GO:0006259 | DNA metabolic process | 6.95E-5 |
|  | GO:0006325 | chromatin organization | 2.49E-4 |
|  | GO:0006139 | nucleobase, nucleoside, nucleotide and nucleic acid metabolic process | 1.22E-3 |
|  |  |  |  |
| Molecular Function | GO:0003735 | structural constituent of ribosome | 3.77E-10 |
|  | GO:0003723 | RNA binding | 3.50E-7 |
|  | GO:0034061 | DNA polymerase activity | 2.79E-6 |
|  | GO:0003676 | nucleic acid binding | 3.97E-6 |
|  | GO:0016779 | nucleotidyltransferase activity | 7.55E-5 |
|  | GO:0004190 | aspartic-type endopeptidase activity | 1.18E-4 |
|  | GO:0003682 | chromatin binding |  |
|  |  |  |  |
| Cellular Component | GO:0043228 | non-membrane-bounded organelle | 1.13E-15 |
|  | GO:0032991 | macromolecular complex | 8.57E-13 |
|  | GO:0030529 | ribonucleoprotein complex | 3.76E-11 |
|  | GO:0005840 | ribosome | 1.39E-10 |
|  | GO:0005622 | intracellular | 4.64E-08 |
|  | GO:0044444 | cytoplasmic part | 6.76E-08 |
|  | GO:0044422 | organelle part | 2.25E-07 |
|  | GO:0000785 | chromatin | 1.97E-06 |
|  |  |  |  |
|  | *Genes with repeats* | |  |
|  |  |  |  |
| Biological Process | - | - | - |
| Molecular Function | - | - | - |
| Cellular Component | - | - | - |

## Supplemental Table S5. Putative structural context of 65 Homopolymeric Amino Acid Repeats (HAARS).

Where a HAAR was in an *E. tenella* protein sequence for which we could identify a structurally solved homologue in the Protein DataBank with >40% sequence identity we assessed the likely structural position of that HAAR. Thirty-five repeats were poly-alanine and often represented substitutions rather than insertions, although the longest alanine repeats were insertions which tended to be associated with helical regions of the structure. Poly-alanine tracts of greater than ten residues have been shown to form alpha-helices, while shorter tracts of around seven residues tend to form beta sheets ([Perutz et al. 2002](#_ENREF_5)). Glutamine HAARs were almost always insertions and tended to be longer than alanine HAARs. They were rarely associated with helical structure, preferring mixtures of loops and turns, sometimes involving stranded regions. Poly-glutamine repeats have been shown to form beta sheets ([Perutz et al. 1994](#_ENREF_4)). Serine HAARs also tended to be inserted, also generally in loop or turn regions, usually with medium to high solvent accessibility. The repeat type is described by the amino acid contained therein, in single-letter code. A repeat is described as aligned to sequence if the majority of that repeat is aligned is mostly aligned to residues in the PBD entry.

| **Etenella Id** | **PDB Id** | **Description** | **Identity (%)** | **BLAST E-value** | **Repeat type** | **Length** | **Aligned to sequence?** | **Close to disorder?** | **Secondary structure** | **Surface accessibility** |
| --- | --- | --- | --- | --- | --- | --- | --- | --- | --- | --- |
| ETH_00001015 | 3bo7D | Isomerase | 50.26 | 8.00E-44 | Q | 22 | No | Yes | Unclear | High |
| ETH_00001015 | 3bo7D | “ | 50.26 | 8.00E-44 | S | 8 | No | No | Loop | Low |
| ETH_00002115 | 2xgjA | DOB1 | 40.99 | 8.00E-166 | Q | 8 | No | Yes | Between helices | High |
| ETH_00002115 | 2xgjA | “ | 40.99 | 8.00E-166 | R | 5 | No | Yes | Between helices | High |
| ETH_00002115 | 2xgjA | “ | 40.99 | 8.00E-166 | S | 7 | No | No | Within turn | High |
| ETH_00002830 | 3kvwA | Kinase | 46.39 | 3.00E-69 | S | 5 | Yes | No | T/E | High/Low |
| ETH_00004005 | 1fmwA | Myosin II Heavy chain | 47.03 | 1.00E-44 | S | 12 | No | No | Turn between helices | Low? |
| ETH_00005580 | 2z5oA | Transportin-1 | 40.06 | 8.00E-46 | L | 6 | Yes | No | Helix | Med |
| ETH_00006120 | 3eg9A | Sec23/24 | 46.14 | 9.00E-179 | A | 12 | No | No | Loop | Med |
| ETH_00007745 | 2x2zE | AMA1 | 41.37 | 6.00E-74 | A | 5 | Yes | No | Helix | High |
| ETH_00007745 | 2x2zE | “ | 41.37 | 6.00E-74 | A | 5 | Yes | No | E/S | High |
| ETH_00008600 | 2pc4C | Fructose-bisphosphate aldolase | 63.56 | 4.00E-100 | A | 8 | No | No | B/G | Low/Med |
| ETH_00009385 | 1gpmC | GMP SYNTHETASE | 41.24 | 3.00E-110 | A | 8 | Unclear | No | Unclear | Unclear |
| ETH_00009385 | 1gpmC | “ | 41.24 | 3.00E-110 | A | 7 | Unclear | No | Unclear | Unclear |
| ETH_00009385 | 1gpmC | “ | 41.24 | 3.00E-110 | A | 6 | Unclear | No | Unclear | Unclear |
| ETH_00011755 | 3hkzA | DNA-directed RNA polymerase subunit A' | 44.01 | 8.00E-119 | S | 7 | Unclear | No | Loop | High |
| ETH_00011830 | 2bpiB | FE-superoxide dismutase | 52.66 | 1.00E-58 | A | 6 | Yes | No | Helix | Med |
| ETH_00011965 | 4d8rj | T-complex protein 1 subunit beta | 49.57 | 2.00E-100 | A | 5 | No | No | Within strand | Med |
| ETH_00011965 | 4d8rj | “ | 49.57 | 2.00E-100 | A | 5 | Yes | No | Helix | Med |
| ETH_00011965 | 4d8rj | “ | 49.57 | 2.00E-100 | Q | 5 | Unclear | No | B/E | Med |
| ETH_00012130 | 3cf3C | Transitional endoplasmic reticulum ATPase | 42.41 | 2.00E-43 | S | 6 | No | No | T | Med |
| ETH_00012790 | 1ul1Z | Flap endonuclease | 43.89 | 7.00E-59 | A | 6 | No | No | T | Med |
| ETH_00012790 | 1ul1Z | “ | 43.89 | 7.00E-59 | A | 10 | No | Yes | Helix | High |
| ETH_00012790 | 1ul1Z | “ | 43.89 | 7.00E-59 | L | 5 | Yes | No | Helix | Med |
| ETH_00012790 | 1ul1Z | “ | 43.89 | 7.00E-59 | S | 8 | No | No | T | Med |
| ETH_00013460 | 3lreB | Kinesin-like protein | 45.1 | 3.00E-63 | L | 5 | Yes | No | Helix | Med/High |
| ETH_00015660 | 1hzjB | UDP-galactose 4-epimerase | 48.99 | 7.00E-70 | A | 7 | No | No | S/Loop | Low/Med |
| ETH_00016495 | 1gadP | Phosphate dehydrogenase | 51.2 | 2.00E-82 | A | 5 | Yes | No | Helix | Med |
| ETH_00016495 | 1gadP | “ | 51.2 | 2.00E-82 | S | 8 | No | No | S/T | Med |
| ETH_00017170 | 1ohdA | Phosphatase | 40.18 | 9.00E-75 | S | 9 | No | No | Loop/S | Low |
| ETH_00017345 | 1vfzA | Kinesin | 42.54 | 5.00E-64 | S | 21 | No | No | T/S/Loop | High |
| ETH_00017345 | 1vfzA | “ | 42.54 | 5.00E-64 | S | 14 | No | No | T/Loop | High |
| ETH_00017545 | 2i44C | Phosphatase | 61.07 | 5.00E-85 | A | 5 | No | No | Loop | High |
| ETH_00017545 | 2i44C | “ | 61.07 | 5.00E-85 | A | 6 | Yes | No | Helix | High |
| ETH_00019210 | 1y8xA | Ubiquitin-conjugating enzyme | 49.09 | 3.00E-42 | A | 9 | No | No | Strand | Low/Med |
| ETH_00019555 | 2ctsA | Citrate synthetase | 42.07 | 3.00E-72 | A | 6 | Yes | No | Helix | Low/Med |
| ETH_00020150 | 3pdbD | Aspartate aminotransferase | 47.15 | 2.00E-97 | A | 5 | Yes | No | Helix | Med/High |
| ETH_00021540 | 3dgzA | Thioredoxin reductase 2 | 42.12 | 1.00E-67 | Q | 11 | No | No | T/Loop | Low/Med |
| ETH_00021540 | 3dgzA | “ | 42.12 | 1.00E-67 | S | 21 | No | No | T/Loop | High |
| ETH_00021645 | 1byuB | GTP-binding protein | 74.4 | 1.00E-89 | D | 5 | Yes | No | T/Loop | High |
| ETH_00022315 | 3f9vA | MCM | 42.33 | 3.00E-70 | A | 6 | No | No | E | Med |
| ETH_00022315 | 3f9vA | “ | 42.33 | 3.00E-70 | A | 13 | No | No | E | Med |
| ETH_00023060 | 2v4uA | CTP synthase 2 | 50.43 | 6.00E-56 | A | 5 | Yes | No | H/Loop/E | Low/High |
| ETH_00023685 | 1q79A | Poly(A) polymerase alpha | 40.76 | 2.00E-80 | A | 5 | No | No | S/H | Low/High |
| ETH_00023685 | 1q79A | “ | 40.76 | 2.00E-80 | A | 8 | Unclear | No | H/T/S | High |
| ETH_00024295 | 3gw0A | Uroporphyrinogen decarboxylase | 43.93 | 7.00E-62 | A | 5 | Yes | No | Helix | Low/Med |
| ETH_00025015 | 1iy2A | FtsH | 56.37 | 3.00E-41 | G | 5 | Yes | No | T/Loop | High |
| ETH_00025760 | 2ywhA | GTP-binding protein LepA | 41.84 | 2.00E-66 | A | 5 | Yes | No | S/Loop/E | Med |
| ETH_00025760 | 2ywhA | “ | 41.84 | 2.00E-66 | A | 5 | No | No | Loop | Low/Med |
| ETH_00025760 | 2ywhA | “ | 41.84 | 2.00E-66 | A | 12 | No | No | Loop | Low/Med |
| ETH_00026155 | 1nbmD | F1-ATPase | 66.67 | 1.00E-151 | A | 5 | Yes | No | S/B/Loop | Low/High |
| ETH_00026155 | 1nbmD | “ | 66.67 | 1.00E-151 | Q | 13 | No | No | S | High |
| ETH_00026155 | 1nbmD | “ | 66.67 | 1.00E-151 | Q | 7 | No | No | E/S | Low/Med |
| ETH_00026155 | 1nbmD | “ | 66.67 | 1.00E-151 | Q | 7 | No | No | E/S | Low/Med |
| ETH_00027740 | 1zbqF | Hydroxysteroid Dehydrogenase | 52.52 | 1.00E-75 | A | 13 | No | No | S/Loop | Med |
| ETH_00027740 | 1zbqF | “ | 52.52 | 1.00E-75 | Q | 12 | No | No | S/Loop | Med |
| ETH_00028570 | 3qo8A | Seryl-tRNA synthetase | 47.19 | 8.00E-118 | A | 9 | No | Yes | Loop/B | High |
| ETH_00028570 | 3qo8A | “ | 47.19 | 8.00E-118 | A | 5 | Yes | No | Helix | Med/High |
| ETH_00028570 | 3qo8A | “ | 47.19 | 8.00E-118 | Q | 8 | No | No | E | Med/High |
| ETH_00028715 | 1j1cB | Kinase | 56.42 | 4.00E-104 | S | 11 | No | No | Unclear | Unclear |
| ETH_00031110 | 3f9vA | MCM | 42.36 | 1.00E-61 | Q | 7 | - | - | - | - |
| ETH_00031570 | 3eu5B | Protein farnesyltransferase | 43.75 | 2.00E-63 | A | 5 | Yes | No | Helix | Low |
| ETH_00035190 | 2h1rB | dimethyladenosine transferase | 55.27 | 7.00E-82 | A | 10 | Yes | No | H/T | Med |
| ETH_00040380 | 1aszB | Asp-tRNA synthetase | 51.6 | 4.00E-47 | Q | 6 | Yes | No | Loop/S/T/H | Med/High |
| ETH_00040515 | 3mweB | ATP-citrate synthase | 40.61 | 2.00E-58 | L | 5 | Yes | No | E | Low |
| ETH_00042040 | 1dj3B | Adenylosuccinate synthetase | 42 | 4.00E-45 | A | 6 | Yes | No | H | Low |

## Supplemental Table S6. Novel gene families of the *Eimeria* genus.

We have annotated those orthoMCL clusters which were specific to *Eimeria* species, based on their sequence properties and frequency in each species.

|  | | *esf1* | *esf2* | *esf3* | *esf4* | *esf5* | *esf6* |
| --- | --- | --- | --- | --- | --- | --- | --- |
| Signal peptide | | None | None | None | None | None | None |
| GPI anchor | | None | None | None | None | None | None |
| Trans-membrane domains | | Yes | Yes | None | None | None | None |
| Known domains | | Molybdopterin (Interpro: PS00559) | None | None | None | None | None |
| Tandemly arrayed? | | Maybe | Yes | Yes | Maybe | Maybe | Yes |
| # members | |  |  |  |  |  |  |
|  | *E. tenella* | 42 | 23 | 17 | 9 | 9 | 10 |
|  | *E. necatrix* | 40 | 22 | 0 | 0 | 2 | 7 |
|  | *E. maxima* | 20 | 4 | 0 | 0 | 1 | 6 |
|  | *E. acervulina* | 18 | 2 | 0 | 0 | 1 | 2 |
|  | *E. brunetti* | 50 | 10 | 0 | 0 | 1 | 3 |
|  | *E. mitis* | 30 | 2 | 0 | 0 | 1 | 3 |
|  | *E. praecox* | 25 | 4 | 0 | 0 | 1 | 5 |

## Supplemental Table S7. Kinases of Eimeria and related species.

Numbers marked with an asterisk were derived directly from [Talevich and Kannan (2013](#_ENREF_7)). The frequency of ROPK subfamilies present in *Eimeria* is shown, additional subfamilies present only in *T. gondii* are not.

| **Kinase group** | ***Eimeria tenella*** | ***Eimeria necatrix*** | ***Eimeria maxima*** | ***Eimeria acervulina*** | ***P. falciparum*** | ***T. gondii*** | ***B. bovis*** |
| --- | --- | --- | --- | --- | --- | --- | --- |
| **AGC** | 9 | 11 | 10 | 9 | 6 | 15 | 4 |
| **CAMK** | 21 | 21 | 14 | 20 | 19 | 29 | 7 |
| **CK1** | 2 | 2 | 3 | 3 | 1 | 3 | 1 |
| **CMGC** | 11 | 10 | 10 | 12 | 22 | 20 | 15 |
| **STE** | 2 | 2 | 2 | 3 | 2 | 2 | 1 |
| **TKL** | 3 | 4 | 4 | 5 | 6 | 6 | 0 |
| **NEK** | 1 | 2 | 2 | 4 | 4 | 4 | 1 |
| **FIKK** | 1 | 1 | 1 | 1 | 19 | 1 | 0 |
| **OPK** | 0 | 0 | 0 | 0 | 5 | 1 | 0 |
| **ROP kinases** | 28* | 28 | 13 | 21 | 0 | 55* | 0 |
| (ROP21/27 | 1 | 1 | 1 | 2 | - | 1 | -) |
| (ROP35 | 2 | 2 | 1 | 2 | - | 1 | -) |
| (Eten1 | 3 | 3 | 0 | 3 | 0 | 0 | 0) |
| (Eten2a | 1 | 1 | 0 | 0 | 0 | 0 | 0) |
| (Eten2b | 1 | 1 | 0 | 1 | 0 | 0 | 0) |
| (Eten3 | 7 | 7 | 3 | 4 | 0 | 0 | 0) |
| (Eten4 | 2 | 2 | 2 | 2 | 0 | 0 | 0) |
| (Eten5 | 4 | 4 | 1 | 1 | 0 | 0 | 0) |
| (Eten6 | 1 | 1 | 1 | 1 | 0 | 0 | 0) |
| (Unique | 6 | 6 | 4 | 5 | 0 | 5 | 0) |
| **PDHK** | 1 | 0 | 0 | 1 | 0 | 4 | 0 |
| **PIKK** | 2 | 2 | 2 | 3 | 3 | 8 | 4 |
| **RIO** | 1 | 2 | 2 | 2 | 2 | 2 | 2 |
| **Total** | **82** | **85** | **63** | **84** | **89** | **128** | **35** |

## Supplemental Table S8. Distribution of LTR retrotransposon copy number across species.

Full-length subfamilies are the classifications for full-length copies found in each genome as described in Figure S4. Numbers in brackets are the number of full-length copies of each subfamily.

|  | Full-length copies | Full-length subfamily | Fragmented |
| --- | --- | --- | --- |
| *E. tenella* | 19 | eimten1LTR (19) | 777 |
| *E. necatrix* | 11 | eimten1LTR (11) | 1353 |
| *E. maxima* | 2 | eimmax1LTR (2) | 1061 |
| *E. acervulina* | 0 |  | 1232 |
| *E. praecox* | 1 | eimpra1LTR (1) | 2315 |
| *E. brunetti* | 2 | eimbru1LTR (1),  eimbru2LTR (1) | 2821 |
| *E. mitis* | 4 | eimmit1LTR (1),  eimmit2aLTR (2),  eimmit2cLTR (1) | 2842 |

## Supplemental Table S9. The gene targets and gene-specific primers used in the single parasite RT-PCR screen of SAG transcription.

Primers panels used in multiplex 1 with *Eimeria tenella* sporozoites, multiplex 2 with second generation merozoites.

| Gene | Accession No. | Multiplex | Primer (forwards 5' - 3') | Primer (reverse 5' - 3') | RT concn (µM)* | 1o PCR concn (µM) |
| --- | --- | --- | --- | --- | --- | --- |
| 5S rDNA | AY943287 | 1, 2 | TCATCACCCAAAGGGATT | TTCATACTGCGTCTAATGCAC | 0.05 | 0.005 |
| SAG23 | AJ586547 | 1 | TGACCATGGTCTCAGCAAAACAGCCTCC | AATAGGACAGTTGCGACGCT | 0.2 | 0.015 |
| SAG22 | AJ586551 | 1 | TGACCATGTGCCTGGACACCATAAACAA | ATGGGTGAATGGGATTACGA | 0.2 | 0.015 |
| SAG13 | AJ586543 | 1 | TGACCATGACAAGTAGCAACAGCGCCTT | AGACGCATTGATGAGAGCCT | 0.2 | 0.015 |
| SAG14 | AJ586545 | 1 | TGACCATGGGTCCGACAAAGCTTCATGT | TTTTGTGCTGCTCGATTGTC | 0.2 | 0.015 |
| SAG59 | - | 1 | TGACCATGCCCAATTGCAAGGAAACTGT | AAAGCAGCAGGTGTCGTCTT | 0.2 | 0.015 |
| SAG53 | - | 1 | TGACCATGCCTTGGCAACAGTACCCAGT | CATCCTTGAATGGGCTGTTT | 0.2 | 0.015 |
| SAG1 | AJ586531 | 1 | TGACCATGTTTGCCTACTACCCCGTCAC | ATGGTTGTGACCTTGCTTCC | 0.2 | 0.015 |
| SAG31 | - | 1 | TGACCATGGGTGAGAAAAGCTGCAGGAC | TGAAGGTCTGATTGGGGAAG | 0.2 | 0.015 |
|  |  |  |  |  |  |  |
| SAG19 | AJ586544 | 2 | CAAAACAGCCTCAGCACAAACAT | ACAGAGCATTGTAAAGCTCCGCT | 0.2 | 0.015 |
| SAG20 | AJ586549 | 2 | TGACCATGGTCTCAGCAAAACAGCCTCC | GGAGCTTGTGCAGCATCATA | 0.2 | 0.015 |
| SAG17 | AJ586541 | 2 | TGACCATGGCTCTCCAACCAGAGACAGG | GTCTTCCGGTTTGATTGCAT | 0.2 | 0.015 |
| SAG15 | AJ586550 | 2 | TGACCATGGACCCGGTCTGTTGACTTGT | TTGCGATTTCAAGTGCTGTC | 0.2 | 0.015 |
| SAG7 | AJ586533 | 2 | TGACCATGTGCACTAAAGCCACTGCATC | GCGATGAAGAGTGCACAAAA | 0.2 | 0.015 |
| SAG12 | AJ586534 | 2 | TGACCATGCAGTGCTTCGACGAAATCAA | AATGCCAAAAACAACCAAGC | 0.2 | 0.015 |
| SAG37 | - | 2 | TGACCATGGTAAGGCTTGATTGCTTCGC | TTTTTAACATCCGTGGGGAA | 0.2 | 0.015 |
| SAG3 | AJ586553 | 2 | TGACCATGAAGGACGGGTTTCCTCTGTT | AAAAAGCCCGTAGGGAAAAA | 0.2 | 0.015 |

*Concentration of the reverse (3’) primer used during multiplex target-specific reverse transcription.

#

# Supplemental Figures

## Supplemental Figure S1. Density of small tandem repeats across *Eimeria* genomes.

(A) Repeat density was calculated in 1kbp windows across each genome assembly for tier 1 and 2 genomes. The distributions suggest two distinct subdistributions, one peaking at zero and another peaking at ~0.2-0.3 depending on the genome. Ninety-seven percent of orthologous genes were conserved in being in either R or P regions between *E. tenella* and *E. necatrix*. Between *E. tenella* and *E. acervulina* only 77.8% were conserved and between *E. tenella* and *E. maxima* 81.6% were conserved. The location of the repeat-rich regions therefore changes over evolutionary time and genes appear to be able to move in and out of these regions. (B) The density of short tandem repeats in homologous regions (identity >=50% and length>= 500bp) is greater in *E. necatrix* then *E. tenella*, consistent with a general increase in the density of repeats across the *E. necatrix* genome. Regression was performed using the *lowess* function in the R software environment.


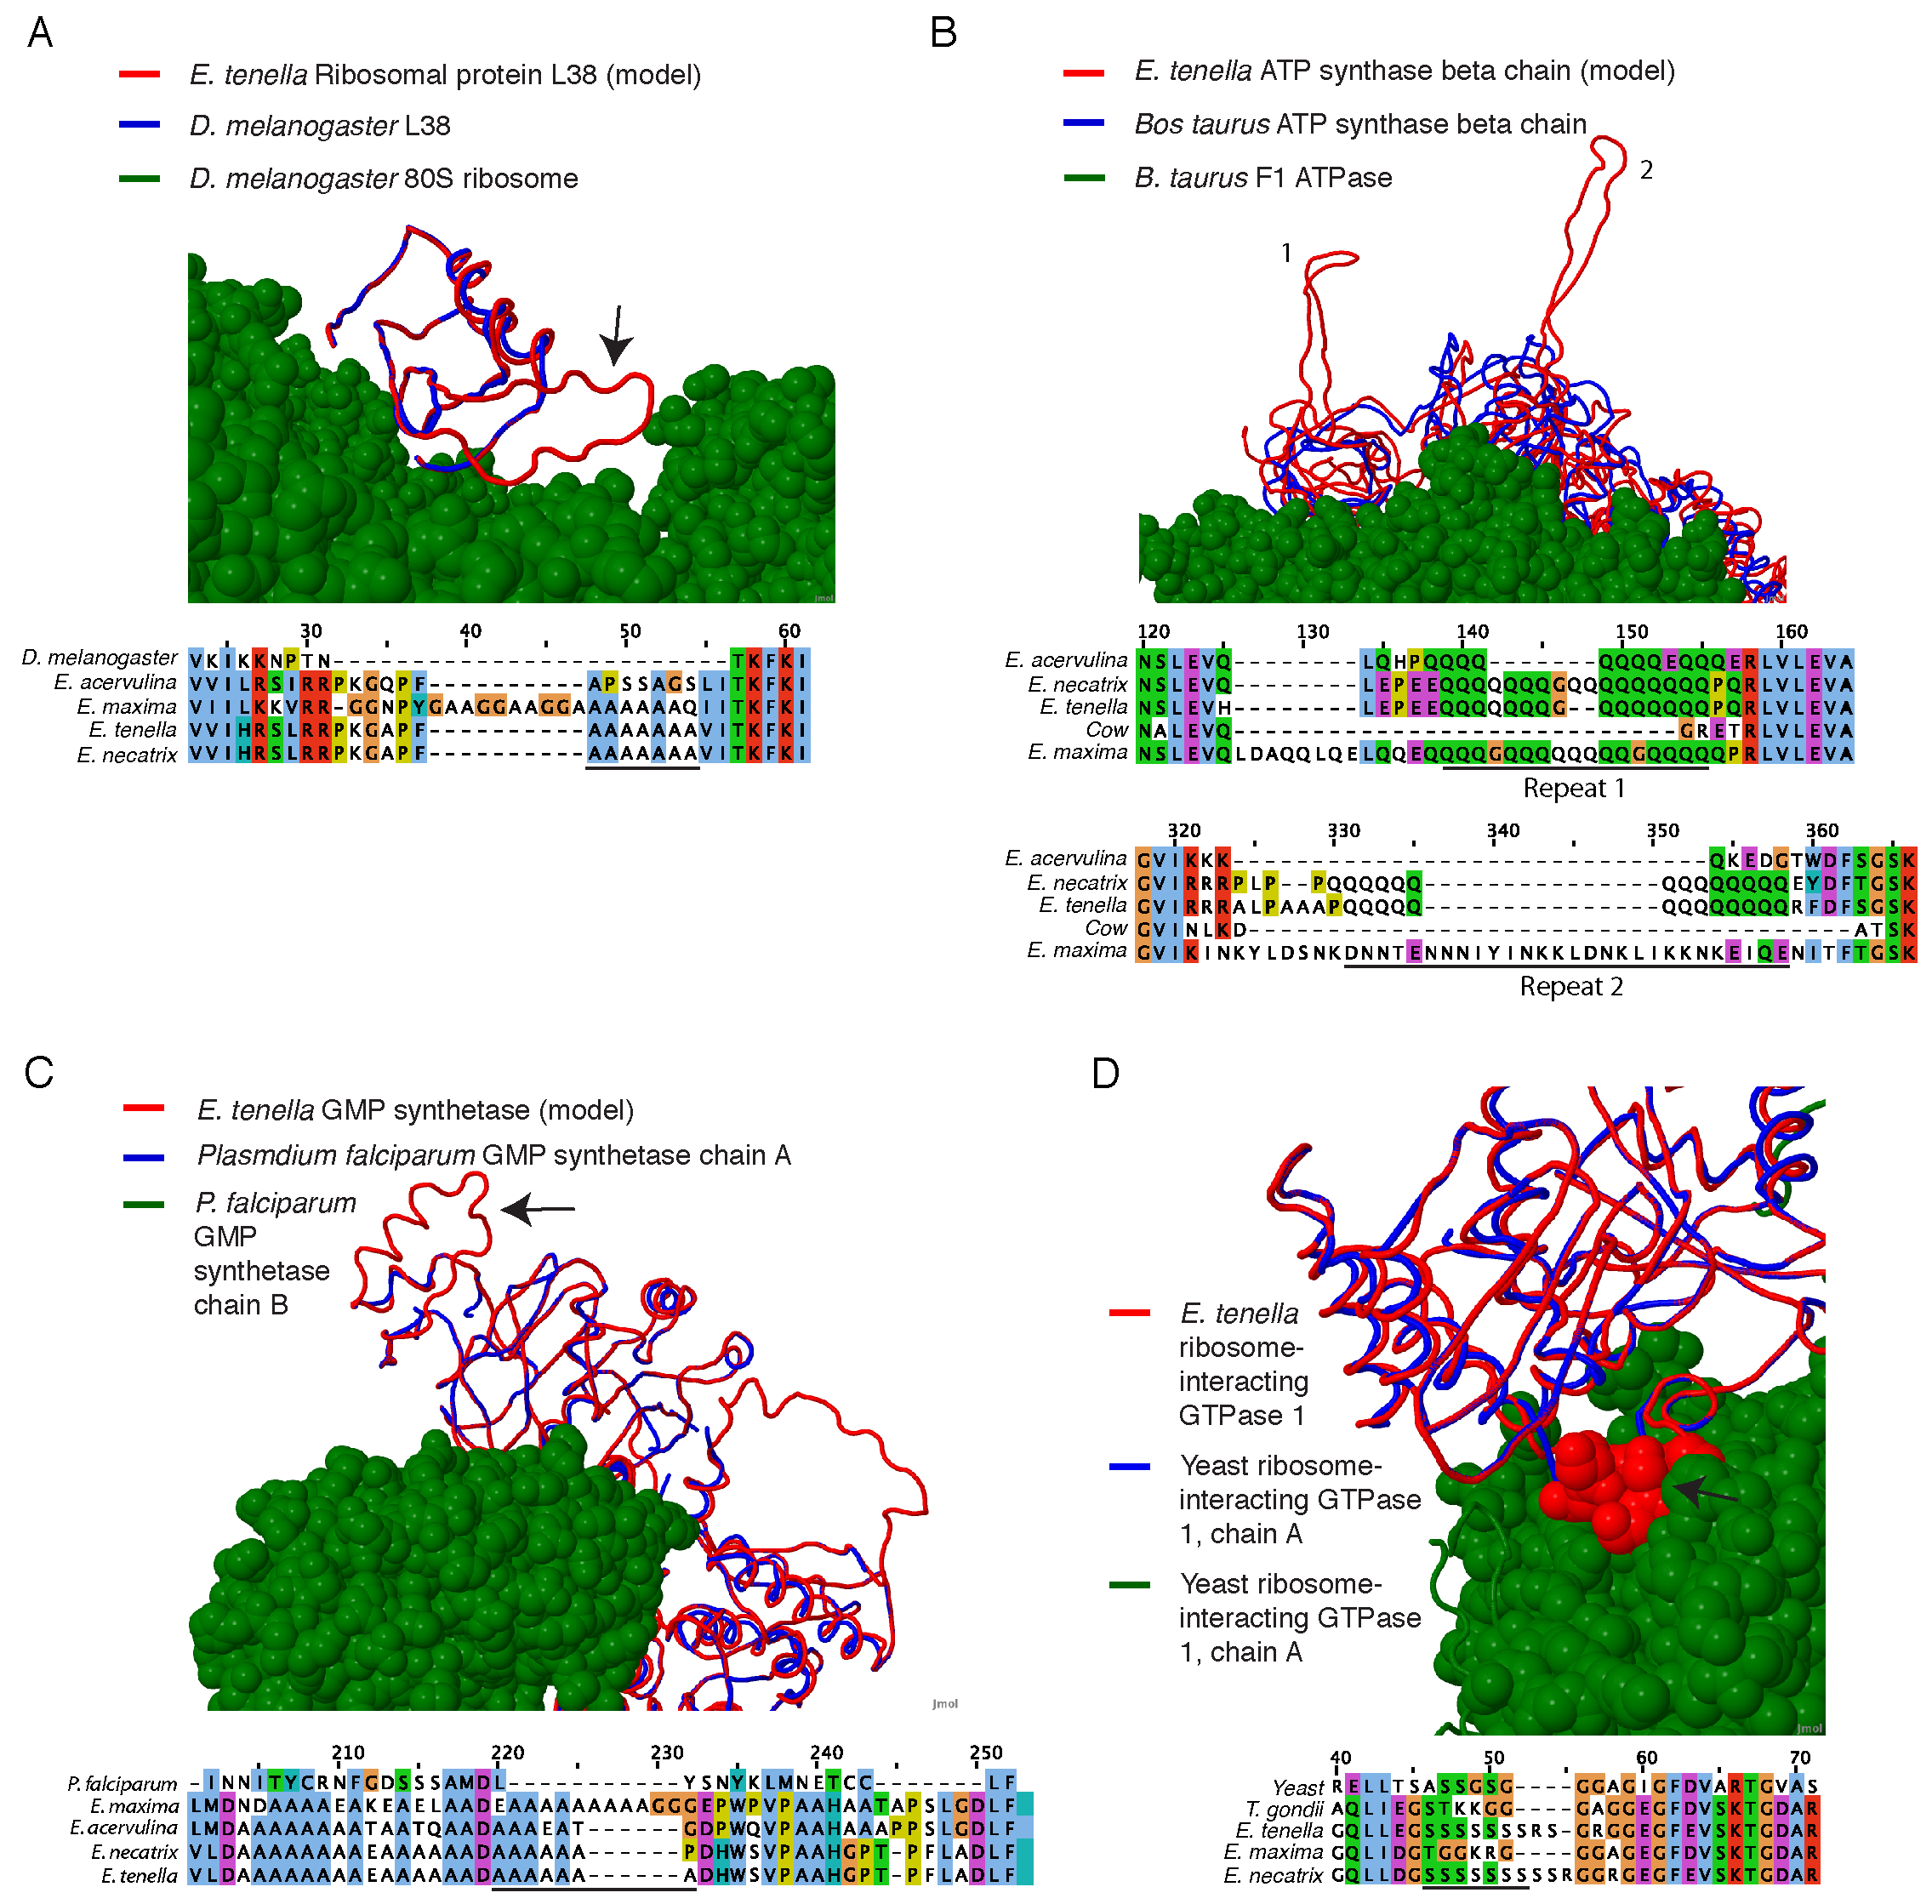


## Supplemental Figure S2. Structural context of HAARs in homology models.

(A) *E. tenella* ribosomal protein L38 (ETH_00013290) was modeled using the Drosophila melanogaster template 3J39k. It shows that the repeat represents an insertion relative to the template which is on the surface of the ribosome. (B) *E. tenella* ATP synthase beta chain (ETH_00026155) was modeled using the bovine template 1h8eE. This sequence has two large HAARs which are insertions relative to the template. These are located on the surface of the ATP synthase. (C) *E. tenella* GMP synthetase was modeled on the *P. falciparum* template 3u0wA. The sequence has a single HAAR which is located in a region at the surface of the template protein which is disordered. (D) *E. tenella* ribosome-interacting GTPase 1 (ETH_00025450; red chain) was modeled on the yeast orthologue template (PDB:4A9A). The model shows a serine HAAR buried at the interface of two domains (blue and green chains). This region is disordered (unobserved) in the yeast crystal structure.


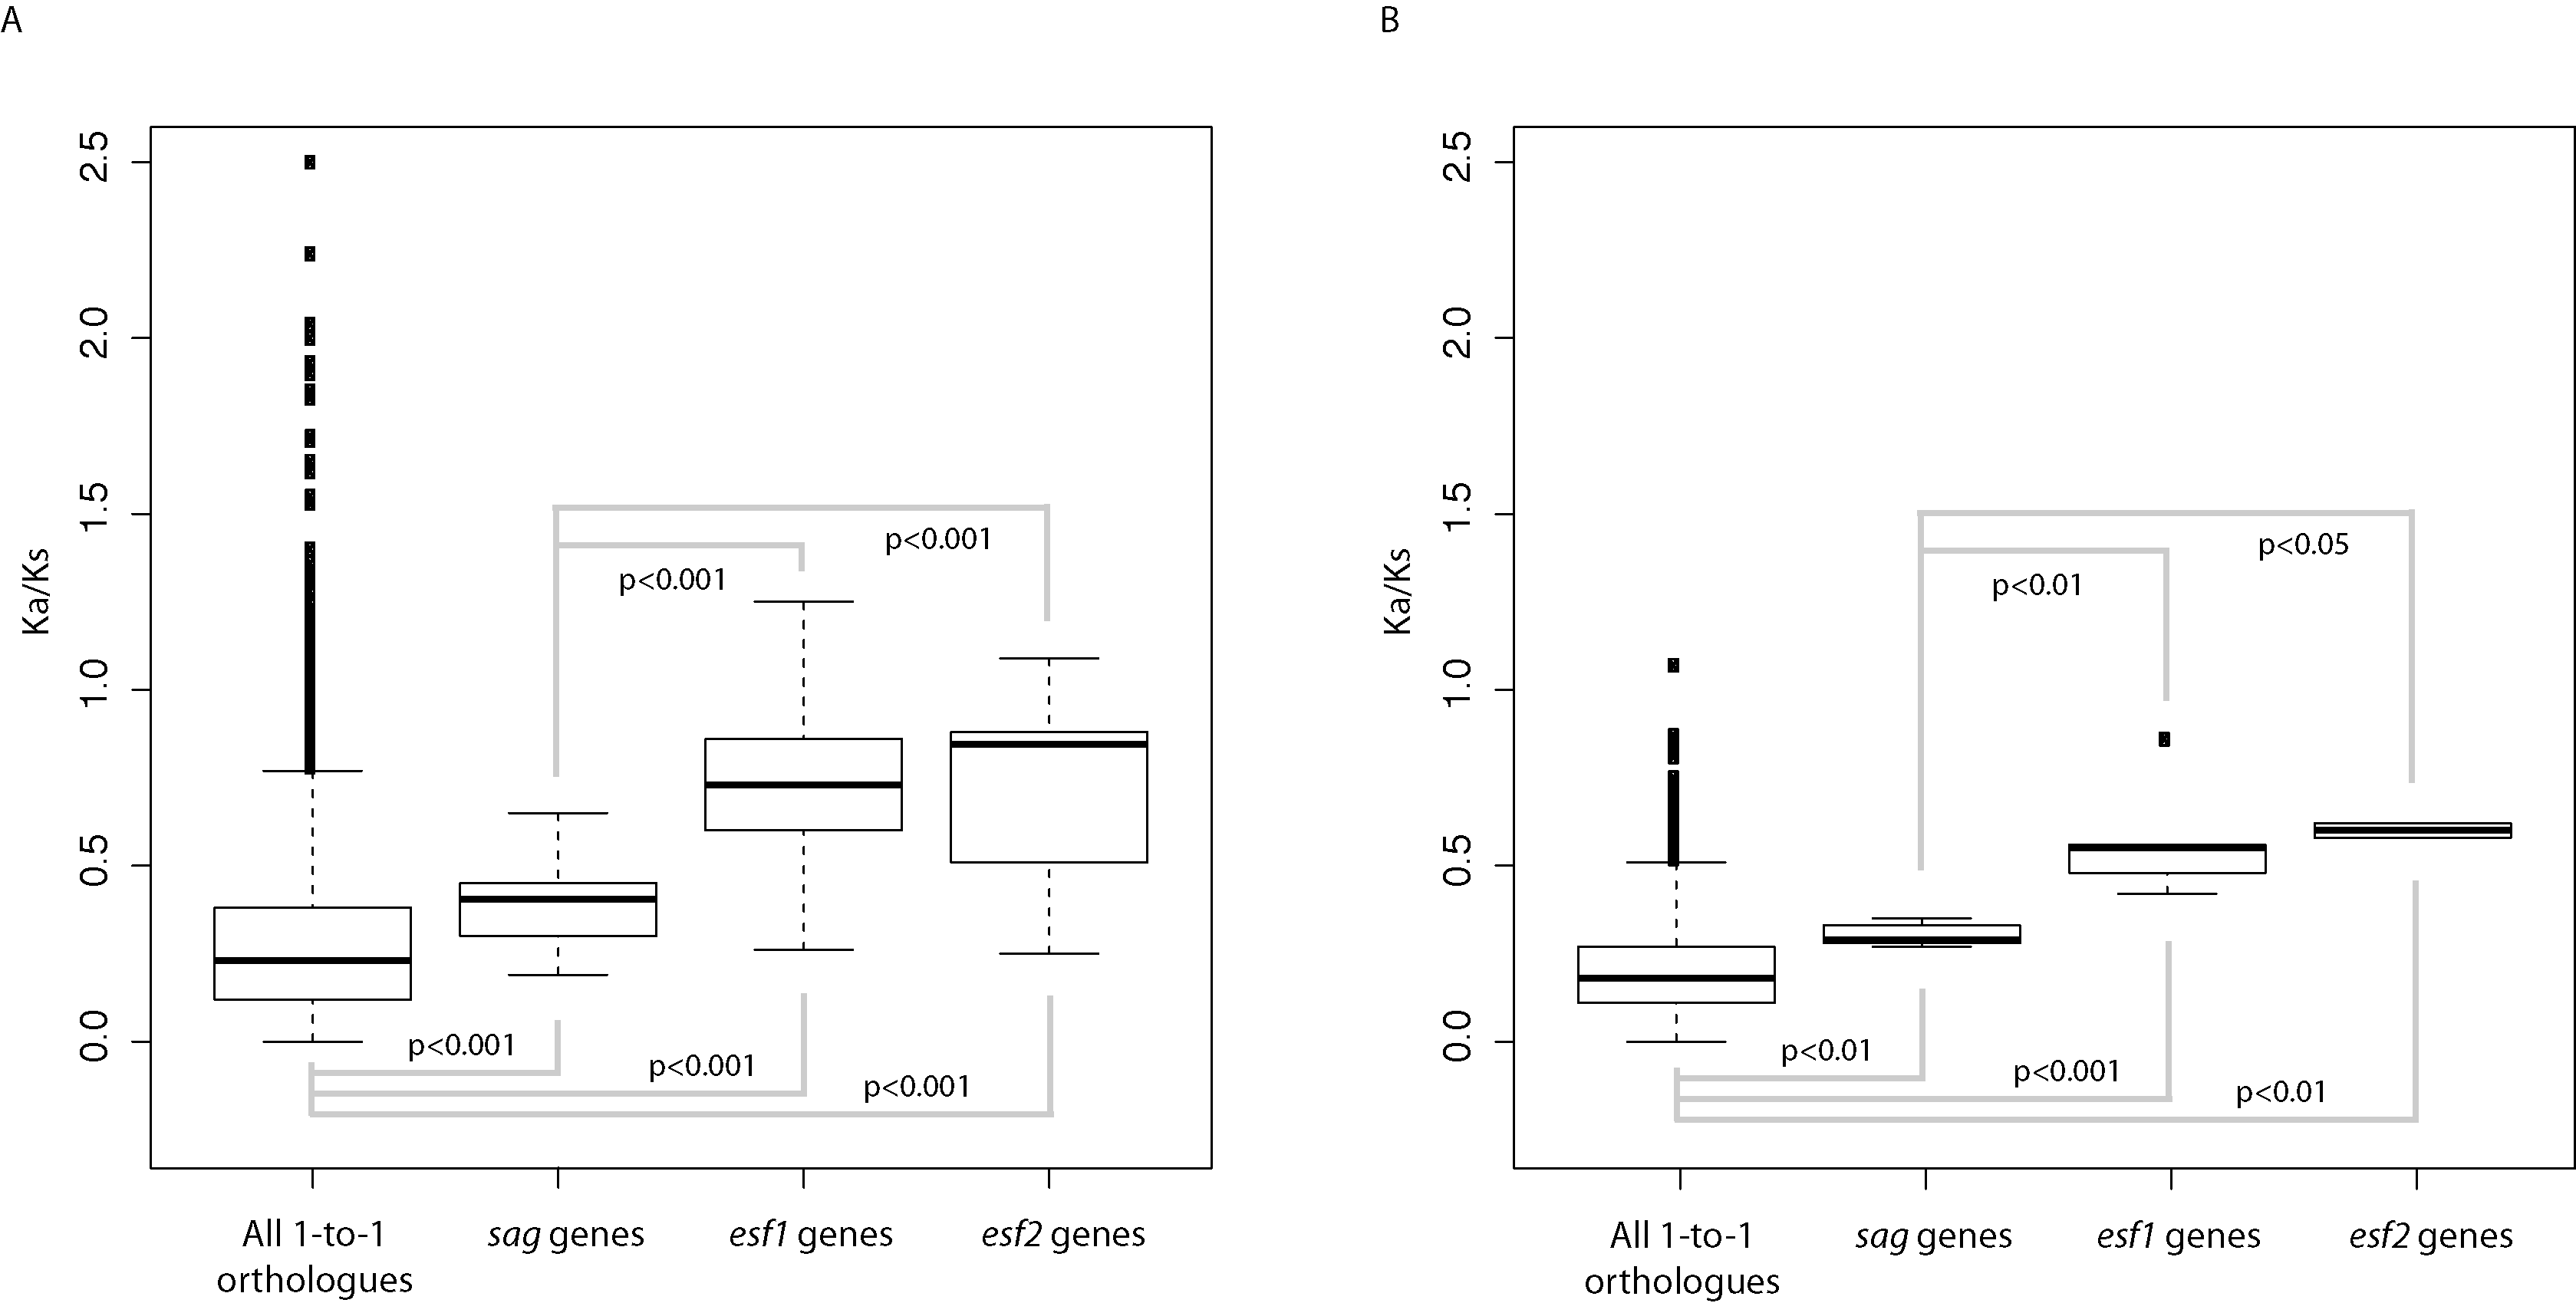


## Supplemental Figure S3. *K*a/*K*s ratios for sag, *esf1* and *esf2* gene families.

(A) Analysis of 1-to-1 orthologues of *E. tenella* and *E. necatrix* show that the *sag*, *esf1* and *esf2* gene families tend to have higher *K*a/*K*s ratios than all genes by the Wilcoxon rank sum test. Furthermore, *esf1* and *esf2* families have significantly higher ratios than *sag* genes. This suggests that esf1 and esf2 are under relaxed selection and is suggestive of a role in host-parasite interactions as they may be diversifying in an arms race with the host. (B) This finding was replicated when calculating *K*a/*K*s between *E. acervulina* and *E. maxima*, showing that these families are under evolving in a similar fashion in both lineages of *Eimeria* infected domestic chickens.


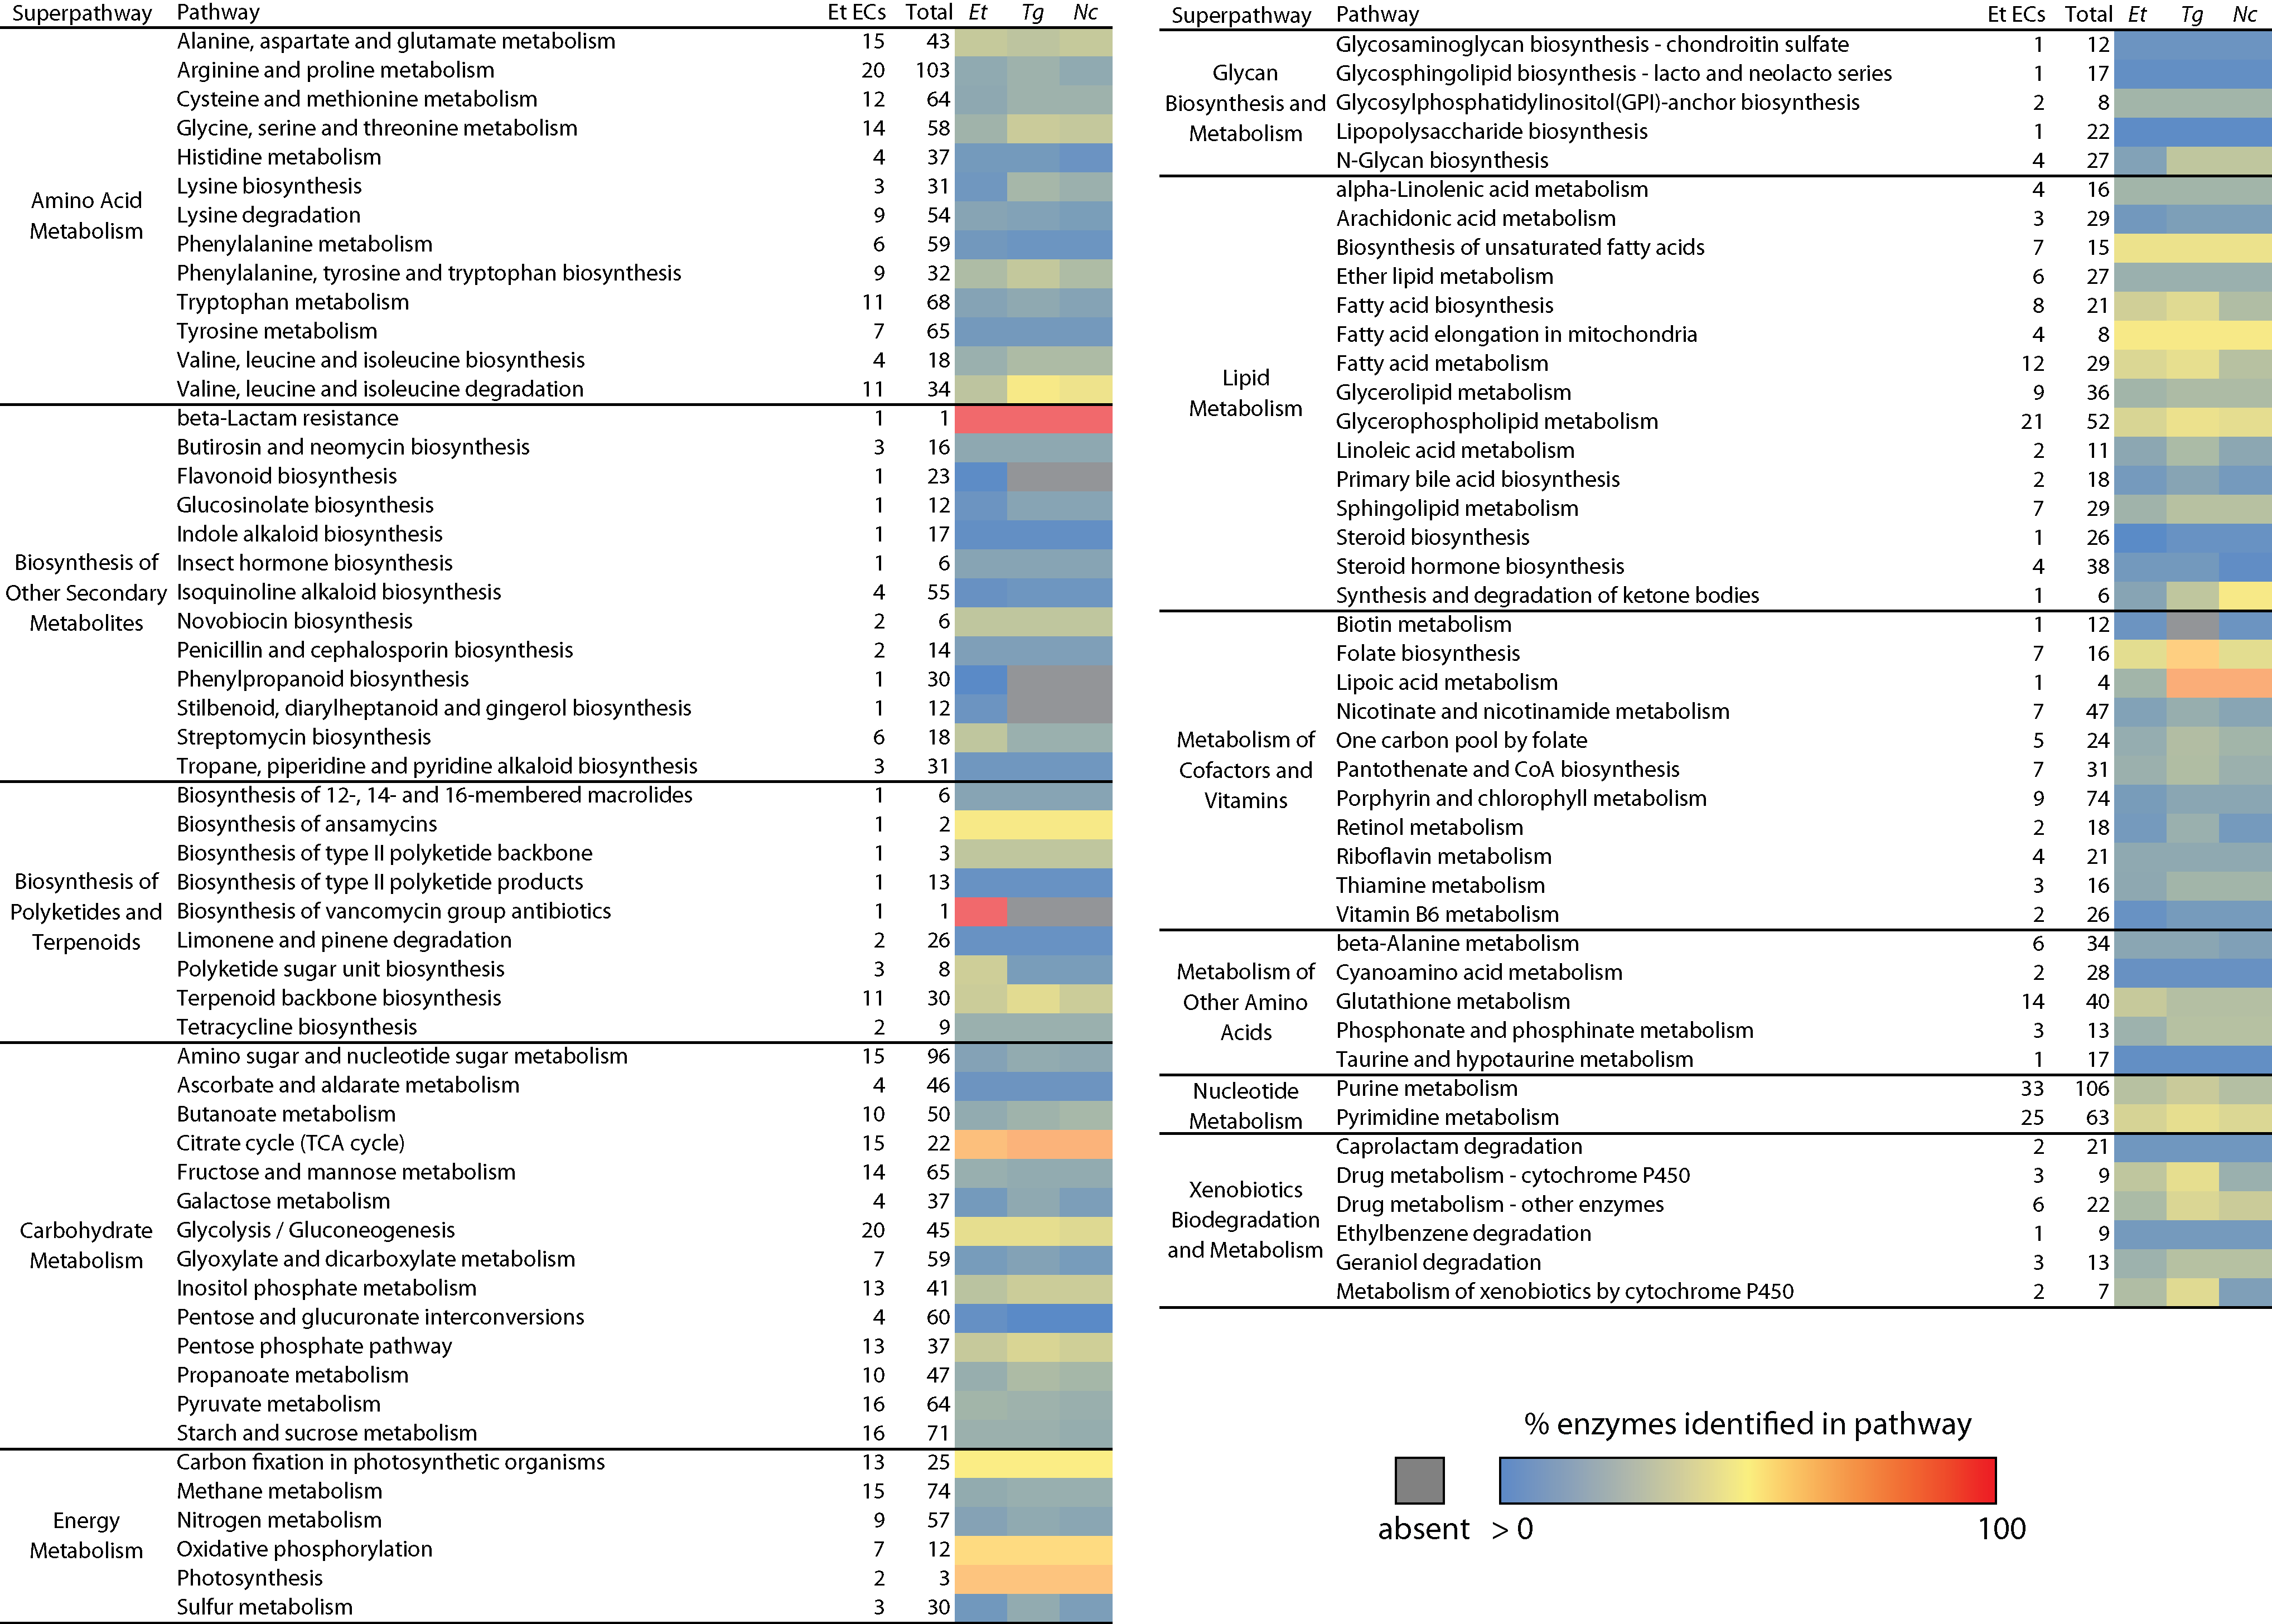


## Supplemental Figure S4. Heatmap showing the conservation of individual metabolic pathways for *E. tenella*, *T. gondii*, and *N. caninum*.

Each row indicates an individual metabolic pathway grouped by their superclass membership (defined by KEGG). Coloured tiles indicate the level of conservation (percentage of enzymes detected) of each pathway within each species. For *T. gondii*, enzymes are based on the integration of BRENDA, ToxoDB, DETECT in addition to those shared by all three of BLAST, PRIAM, and KEGG. A similar integration is performed for identifying *N. caninum* enzymes, but with an additional dataset of the enzymes corresponding to *T. gondii* orthologs.


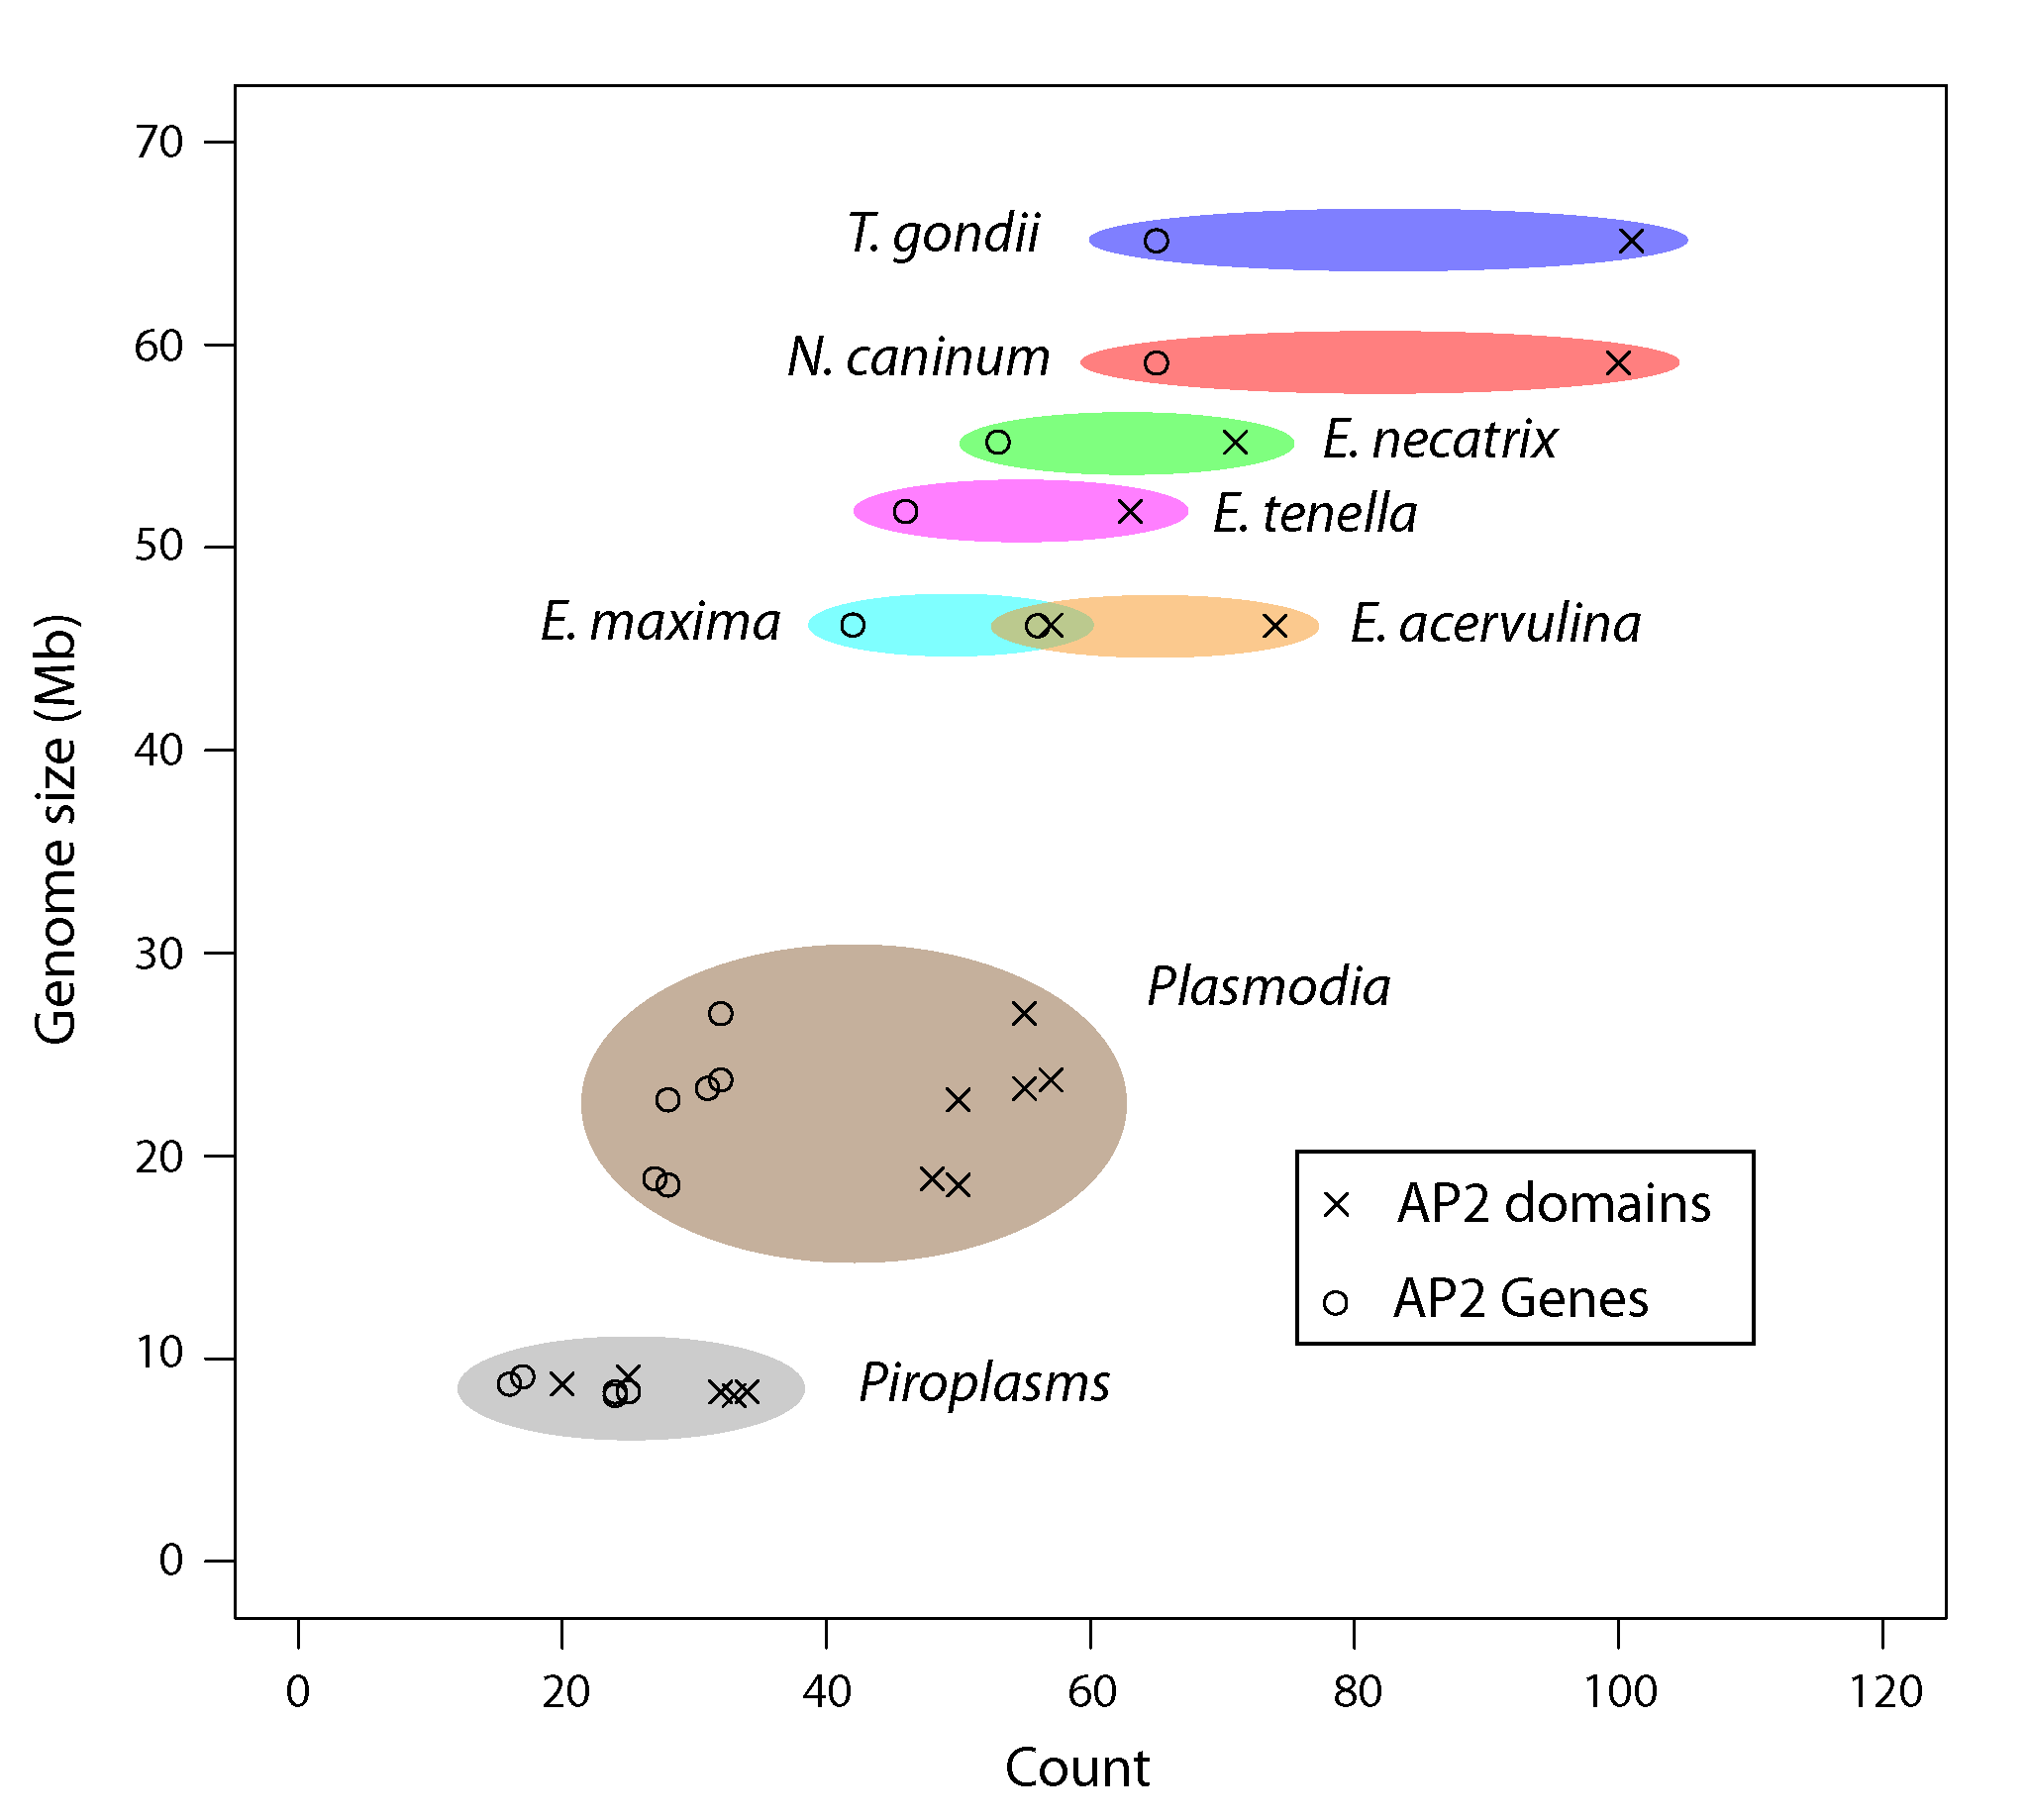


## Supplemental Figure S5. Distribution of the Api-AP2 family of DNA-binding domains and genes across the Apicomplexa.

The number of genes containing AP2 domains is correlated with genome size across the Apicomplexa. We compiled the proteomes from public databases such as EupathDB and NCBI Genome database (http://www.ncbi.nlm.nih.gov/genome). We searched for the presence of AP2 domain (PF00847) in predicted Eimeria proteomes and related species using the ‘pfam_scan.pl’ script (<ftp://ftp.sanger.ac.uk/pub/databases/Pfam/Tools/PfamScan.tar.gz>) with default parameters, which is profiles’s GA gathering cutoff (20.50). The second step was through manual curation using TBLASTN to identify additional Ap2 family orthologues due to missed genes predictions during automated annotation. We used AP2 genes identified through pfam_scan.pl as query and formatted seven *Eimeria* genomes as database with >=70% identity match and e-value of 1e-5 cutoff.


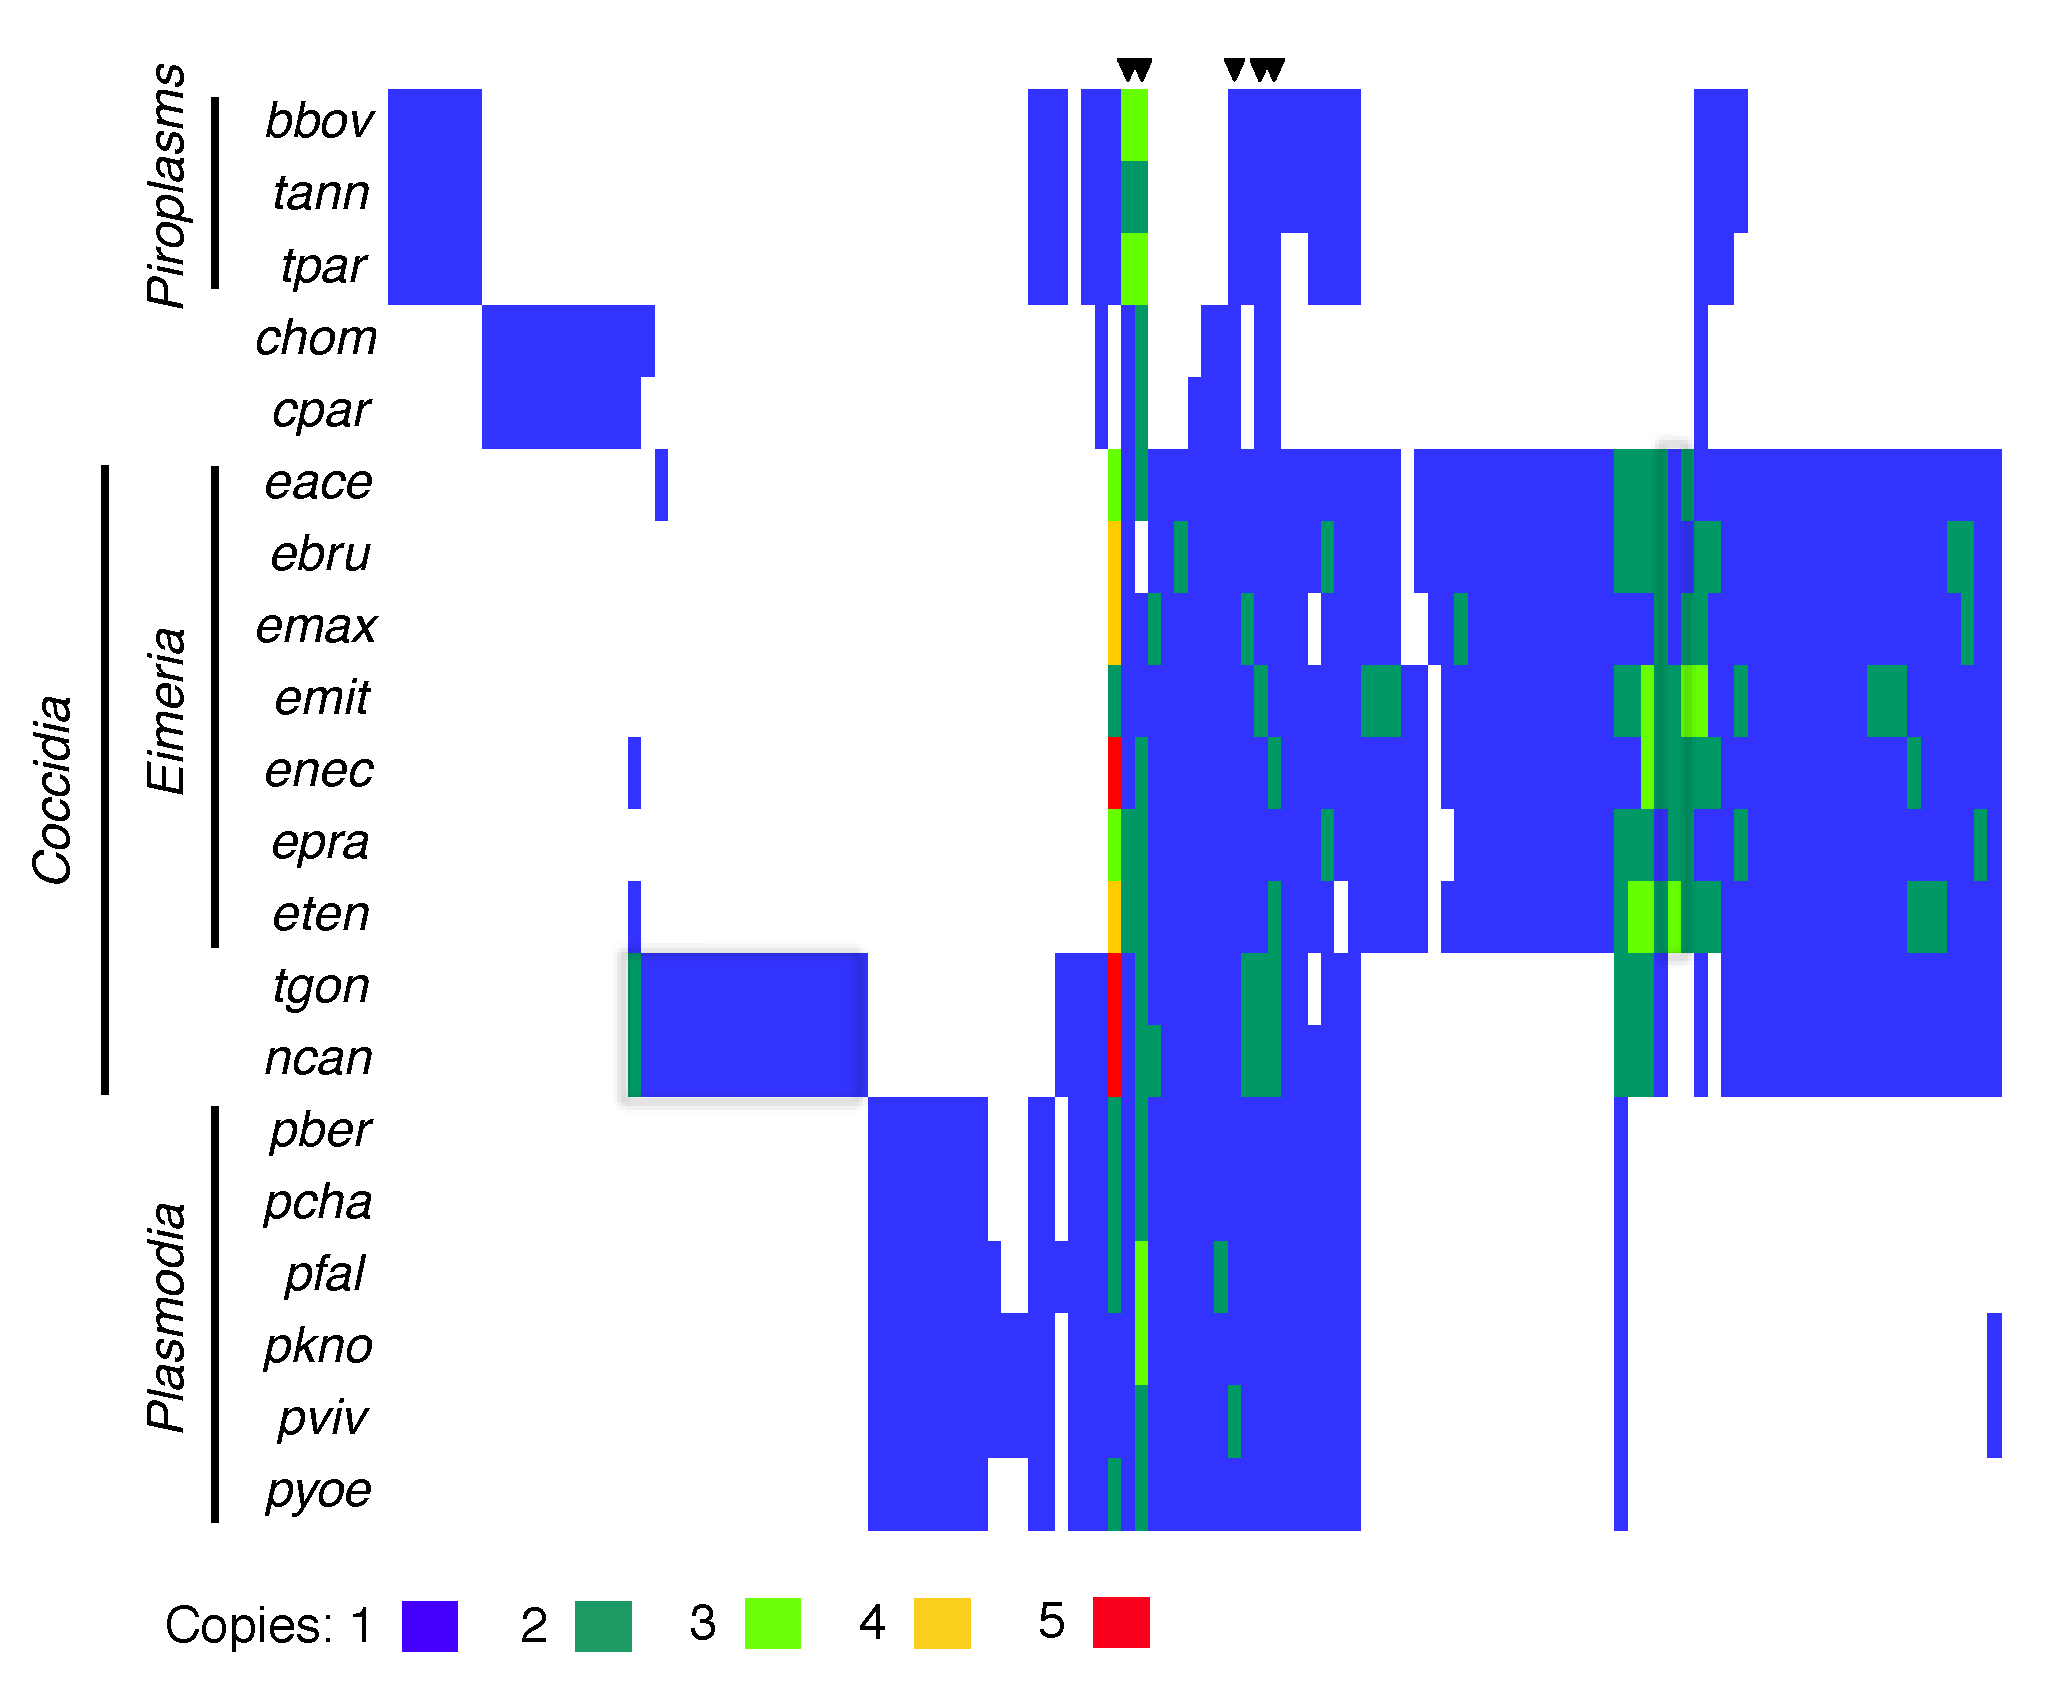


## Supplemental Figure S6. Clustering of ApiAP2 domain-containing genes across the Apicomplexa.

The OrthoMCL groups for apiAP2 genes are plotted as a heatmap. Each column represents a particular orthologous group with the number of genes per species in that group represented by colour. We identified five orthologous groups conserved across the apicomplexa, marked with arrows (in order left to right: apiap2_og_336, apiap2_og _90, apiap2_og _1428, apiap2_og _546, apiap2_og _456)

**
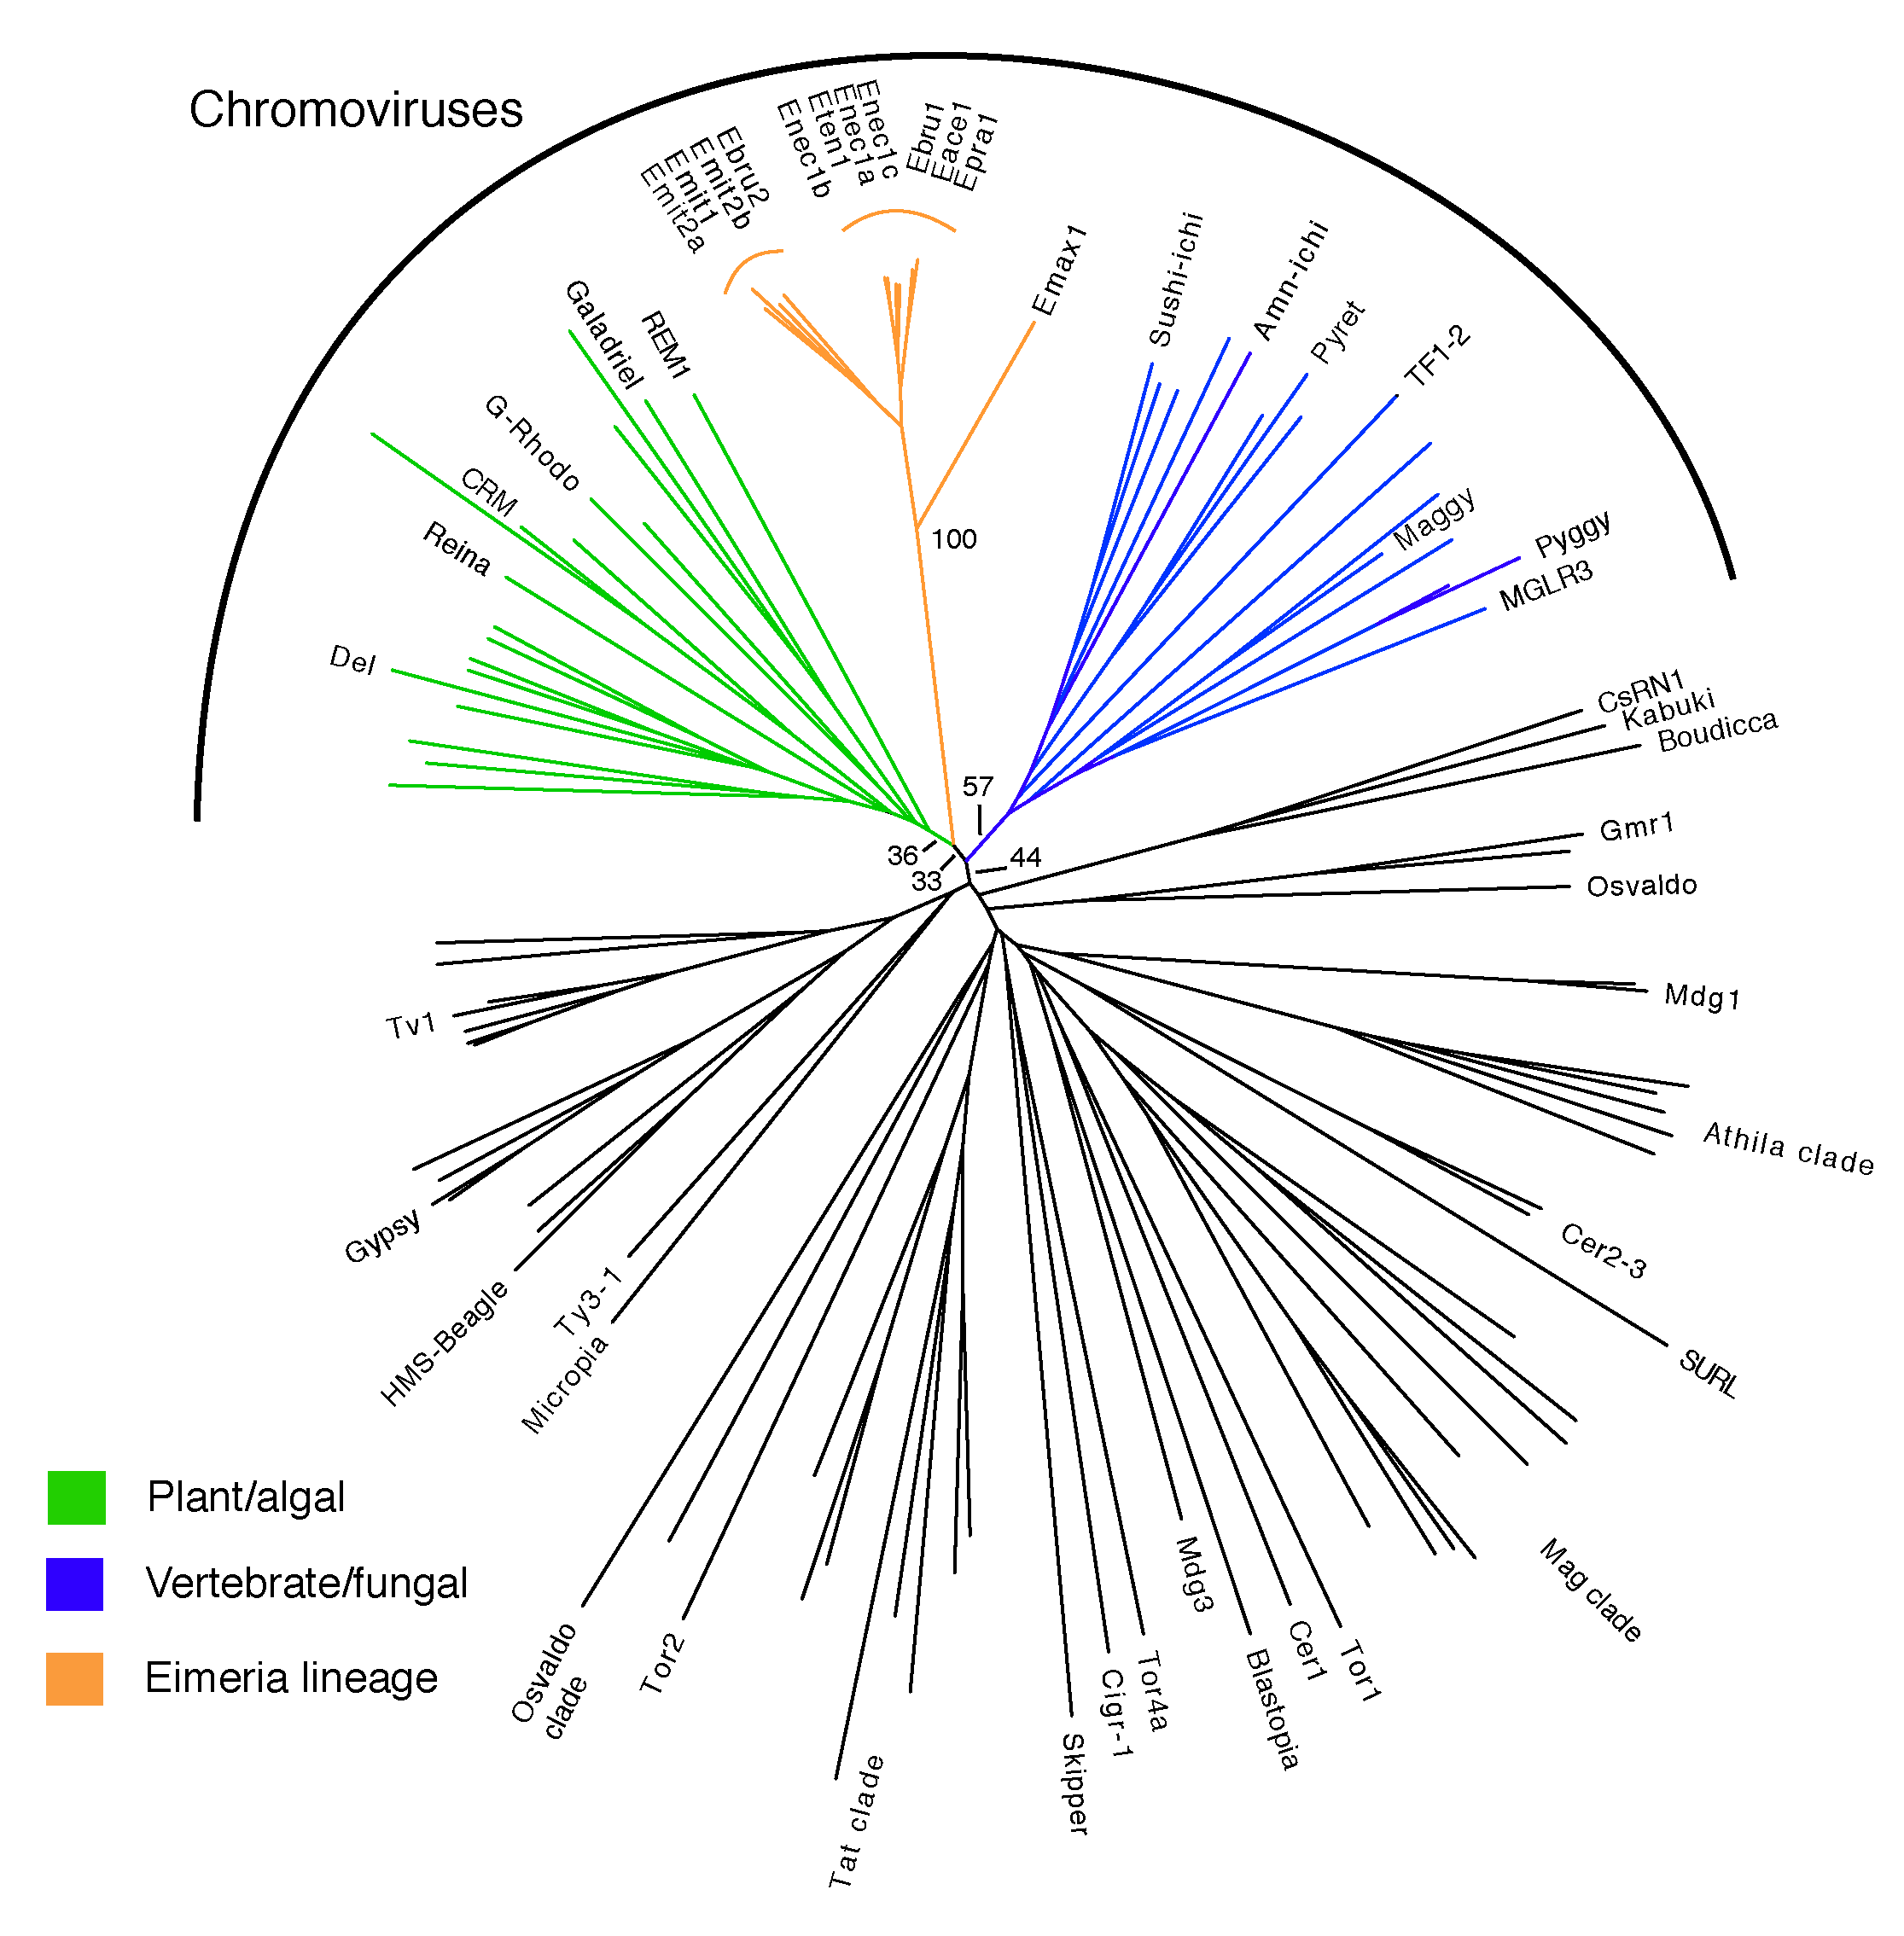
**

## Supplemental Figure S7. Neighbour-joining phylogeny of Ty3/Gypsy LTR retrotransposon reverse transcriptases.

*Eimeria* LTR retrotransposons fall within the chromoviruses and indeed have chromodomains in addition to reverse transcriptases, which typifies this group. Bootstrapping (1000 replicates) shows that it is not clear whether *Eimeria* chromoviruses are most related to the plant/algal or vertegrate/fungal lineages.


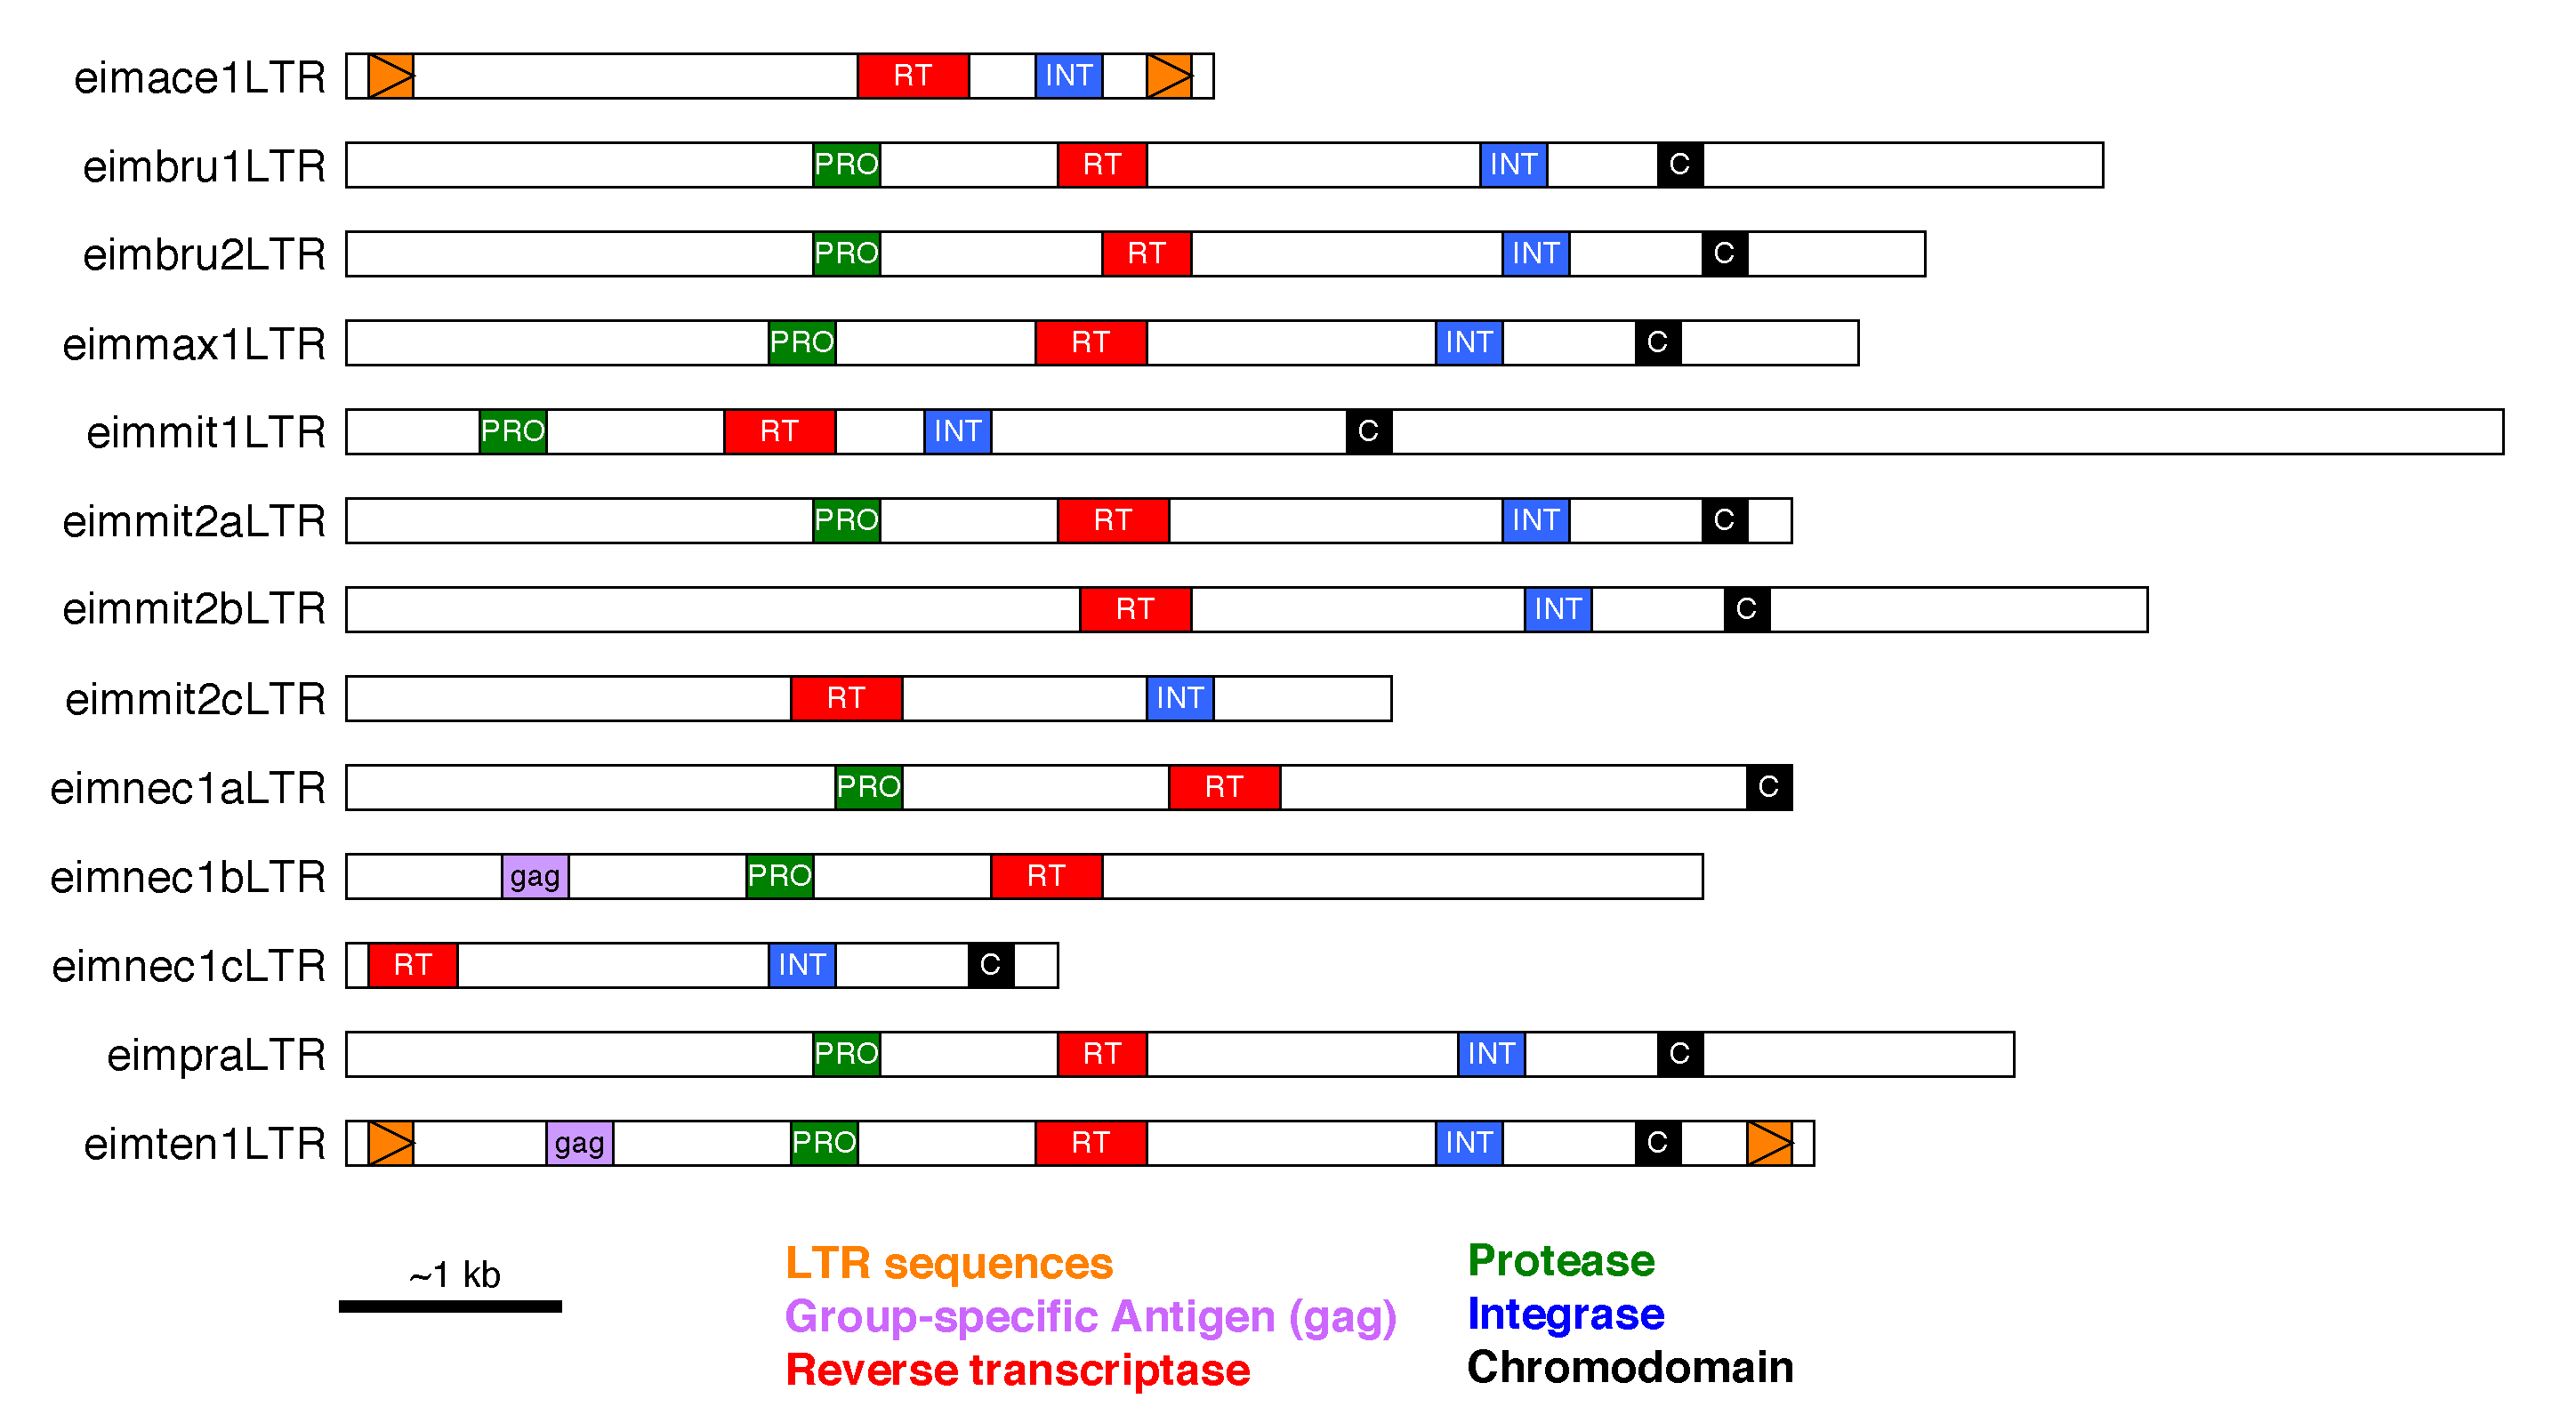


## Supplemental Figure S8. Domain structures of chromovirus consensuses.

Chromovirus sequences were clustered and representative examples extracted from these clusters. Their domain structures were determined using HMMsearch. Full-length copies show homology to gag knuckle, aspartyl protease, reverse transcriptase, integrase and the chromodomain; RNase H was seen in some cases. The *gag* gene is always reduced to the gag knuckle and both *gag* and *pol* open reading frames are always interrupted with stop codons suggesting that the genes are not functional.


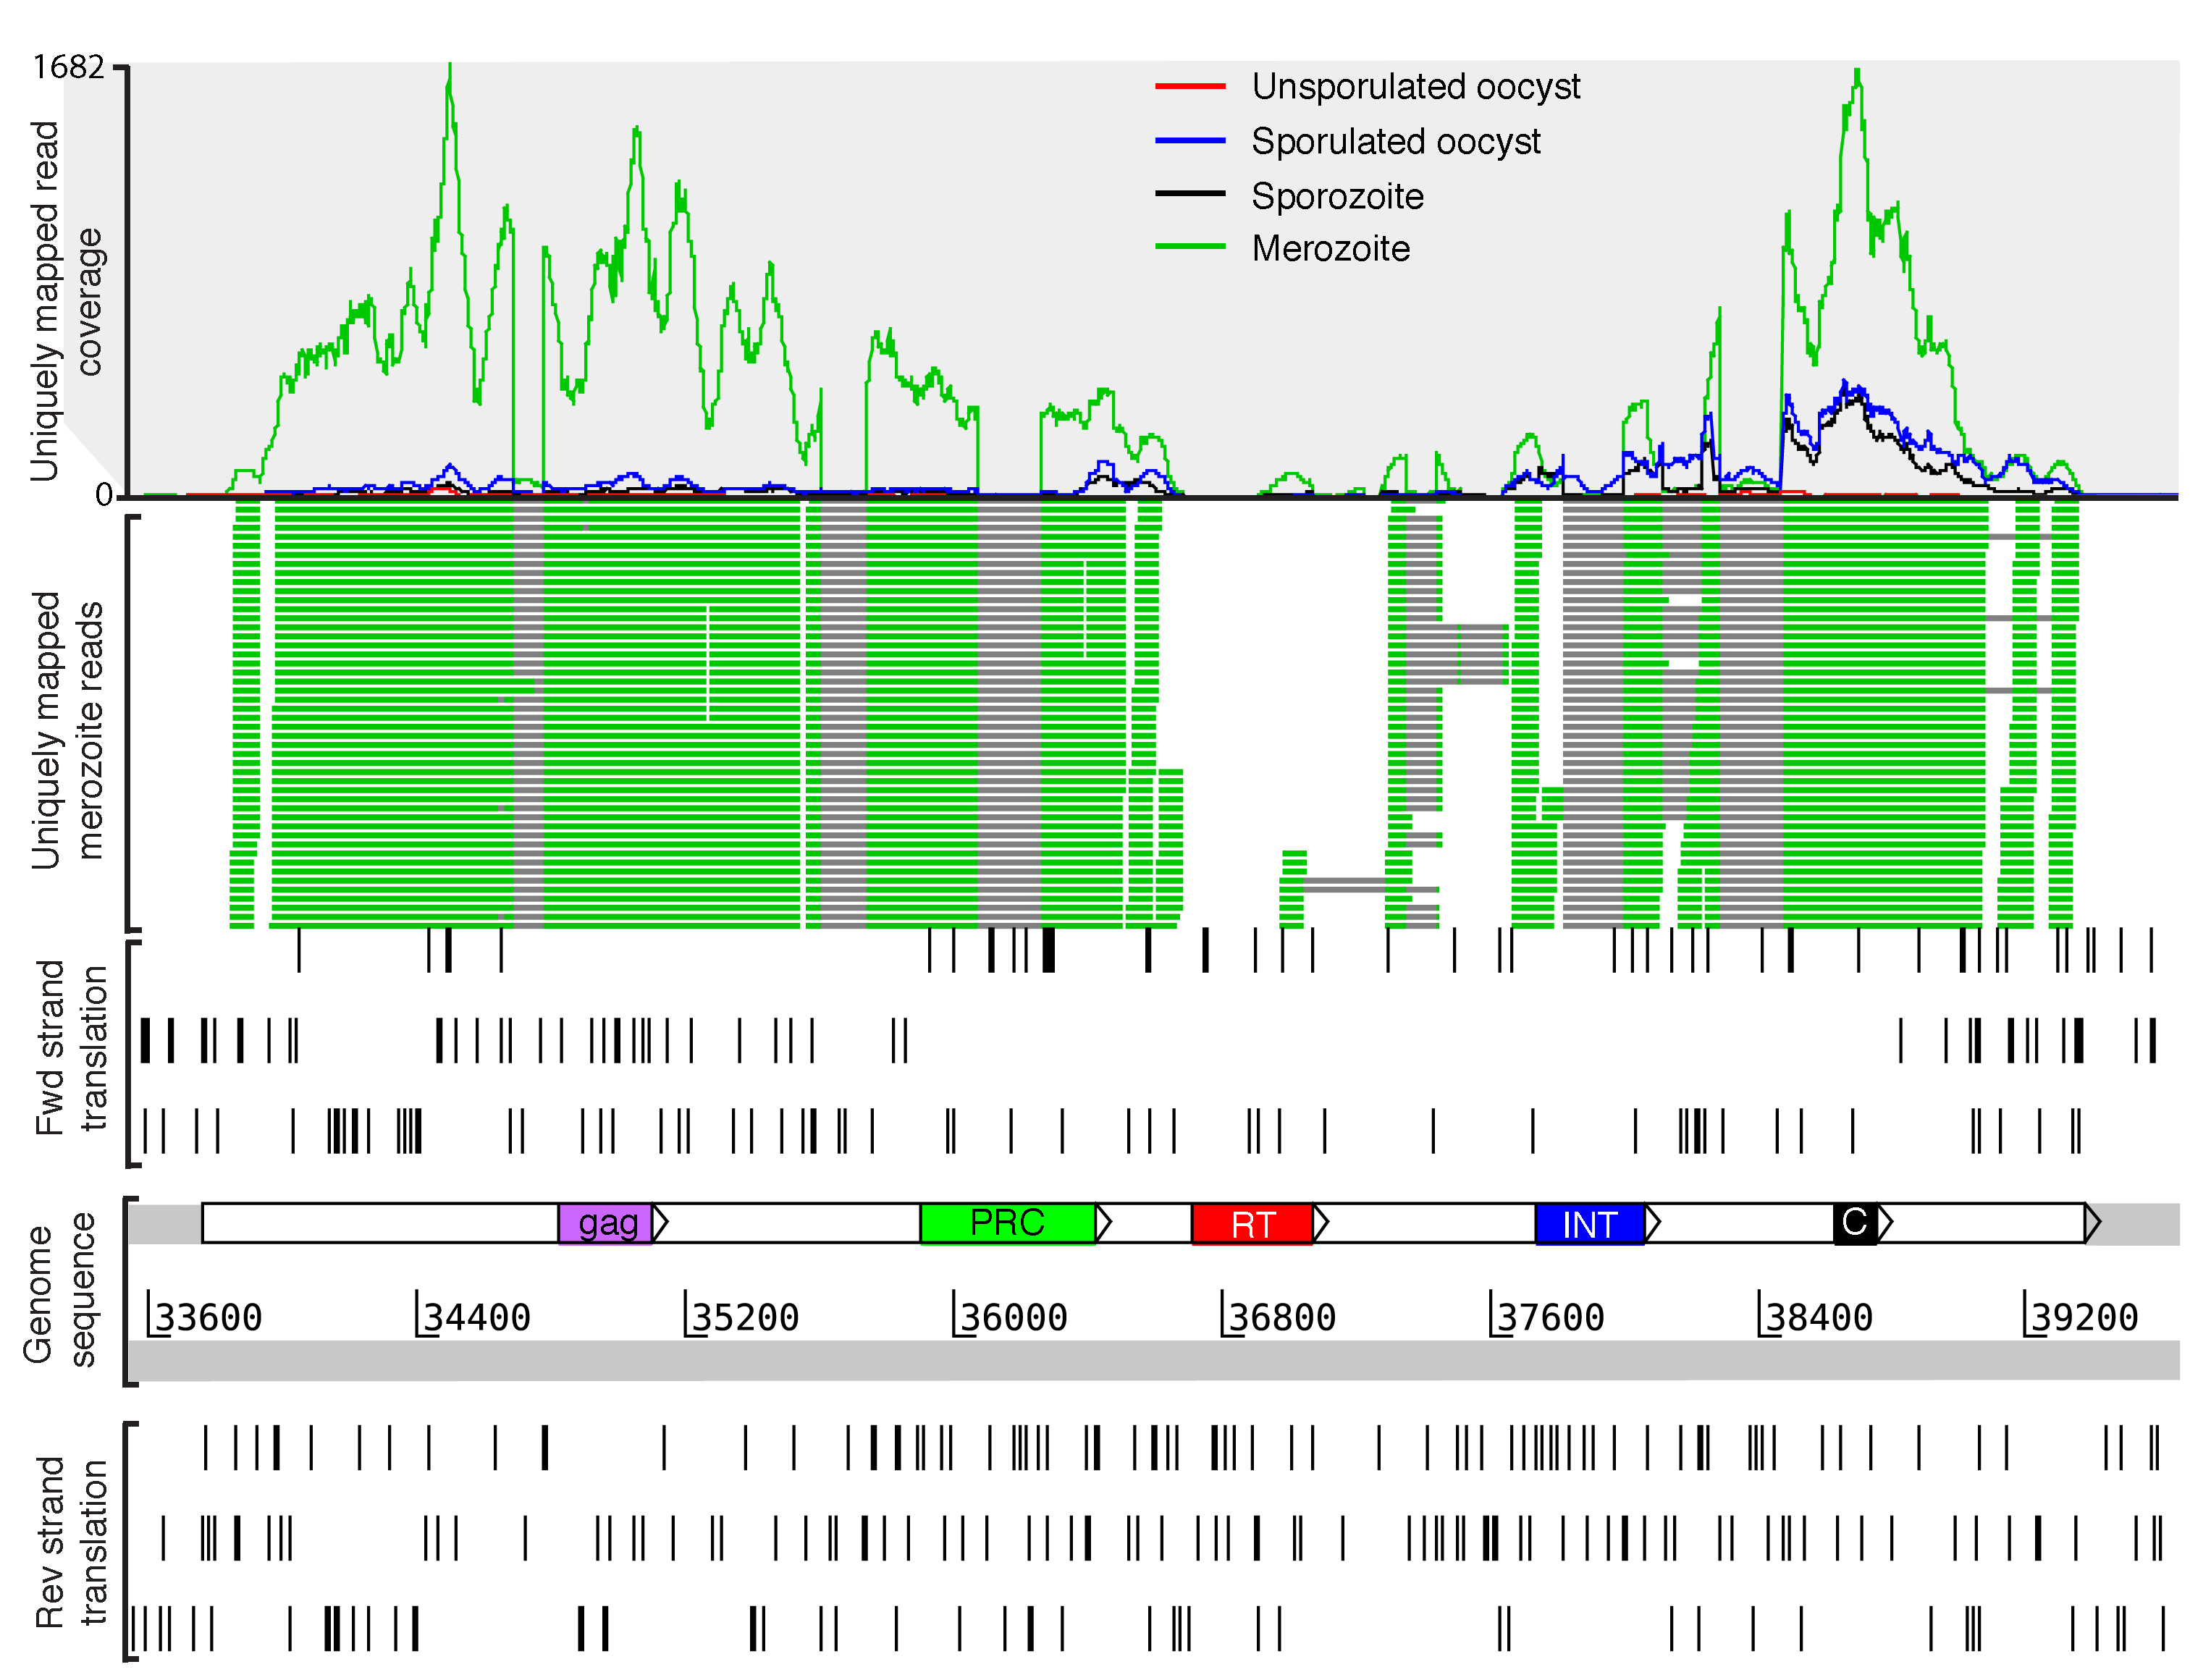


## Supplemental Figure S9. Expression pattern for an example LTR retrotransposon from *E. tenella*.

Transcriptome read coverage from four life stages is shown in the top panel, mapped to ETH_00060060, an example eimten1LTR from *E. tenella*, on scaffold Eth_scaff28. Only reads mapping uniquely to this region of the genome are shown. The dip in coverage in the middle of the element is at least partly due to the reduced uniqueness of the element around the reverse transcriptase, which is the more conserved part of the element. The second panel shows individual reads mapping from the merozoite stage in green and, in grey, where they are broken over putative introns. Note that no reads were identified bridging the two halves of the transposon separated by the putative reverse transcriptase domain (in red), even when including non-uniquely mapping reads, suggesting that there are two transcripts at this locus. This is also suggested by differences in read coverage between the two ends in the sporulated oocyst and sporozoite stages. Nonsense mutations in the forward frame translation suggest that open reading frames expected of an intact retrotransposon are not present and putative splice sites interrupt several of the predicted domains. Canonical donor and acceptor sites around the putative introns are located on the reverse strand suggesting that transcription is of the reverse complement of the sequence, which coded for the ancestral retrotransposon. Between strains of *E. tenella* (Houghton, Wisconsin and Nippon) we find only one transposon that varied in copy number. This suggests that if retrotransposition events do still occur in *E. tenella* they are rare. It is currently unclear whether these transposons are merely degraded or whether their expression and splicing relates to function.

# Supplemental Datasets

## Supplemental Dataset S1. Details of gene families of interest.

This spreadsheet lists genes which we have assigned to different genes families: novel, *Eimeria*-specific families (tab 1), rhoptry kinase families (tab 2), ApiAP2 transcription factors (tab 3), orthologous groups of ApiAP2 transcription factors across *Apicomplexa* (tab 4).

## Supplemental Dataset S2. *K*a/*K*s ratios

*K*a/*K*s ratios for pairwise alignments between one-to-one orthologues are presented in two sheets. Firstly where *E. tenella* genes where compared againsts one-to-one orthologues for from each other genome (tab 1), secondly for *E. acervulina* against each other genome.

## Supplemental Dataset S3. Metabolic annotation for *E. tenella* genes

Enzyme Commission term assignments for each *E. tenella* gene based on BLAST, DETECT, PRIAM and *T. gondii* orthologue information.

# References

Boyle EI, Weng S, Gollub J, Jin H, Botstein D, Cherry JM, Sherlock G. 2004. GO::TermFinder--open source software for accessing Gene Ontology information and finding significantly enriched Gene Ontology terms associated with a list of genes. *Bioinformatics* **20**(18): 3710-3715.

Lim LS, Tay YL, Alias H, Wan KL, Dear PH. 2012. Insights into the genome structure and copy-number variation of Eimeria tenella. *BMC Genomics* **13**: 389.

Parra G, Bradnam K, Korf I. 2007. CEGMA: a pipeline to accurately annotate core genes in eukaryotic genomes. *Bioinformatics* **23**(9): 1061-1067.

Perutz MF, Johnson T, Suzuki M, Finch JT. 1994. Glutamine repeats as polar zippers: their possible role in inherited neurodegenerative diseases. *Proc Natl Acad Sci U S A* **91**(12): 5355-5358.

Perutz MF, Pope BJ, Owen D, Wanker EE, Scherzinger E. 2002. Aggregation of proteins with expanded glutamine and alanine repeats of the glutamine-rich and asparagine-rich domains of Sup35 and of the amyloid beta-peptide of amyloid plaques. *Proc Natl Acad Sci U S A* **99**(8): 5596-5600.

Reid AJ, Vermont SJ, Cotton JA, Harris D, Hill-Cawthorne GA, Konen-Waisman S, Latham SM, Mourier T, Norton R, Quail MA et al. 2012. Comparative genomics of the apicomplexan parasites Toxoplasma gondii and Neospora caninum: Coccidia differing in host range and transmission strategy. *PLoS Pathog* **8**(3): e1002567.

Talevich E, Kannan N. 2013. Structural and evolutionary adaptation of rhoptry kinases and pseudokinases, a family of coccidian virulence factors. *BMC evolutionary biology* **13**: 117.
